# Supplementary material for: Oxygen Regulates Human Pluripotent Stem Cell Metabolic Flux
Source: Hindawi journal article supplement (doi:10.1155/2019/8195614), 2019-05-19
Supplement: f1 [file 8195614.f1.pdf]

710 **Supplementary Figures and Tables**

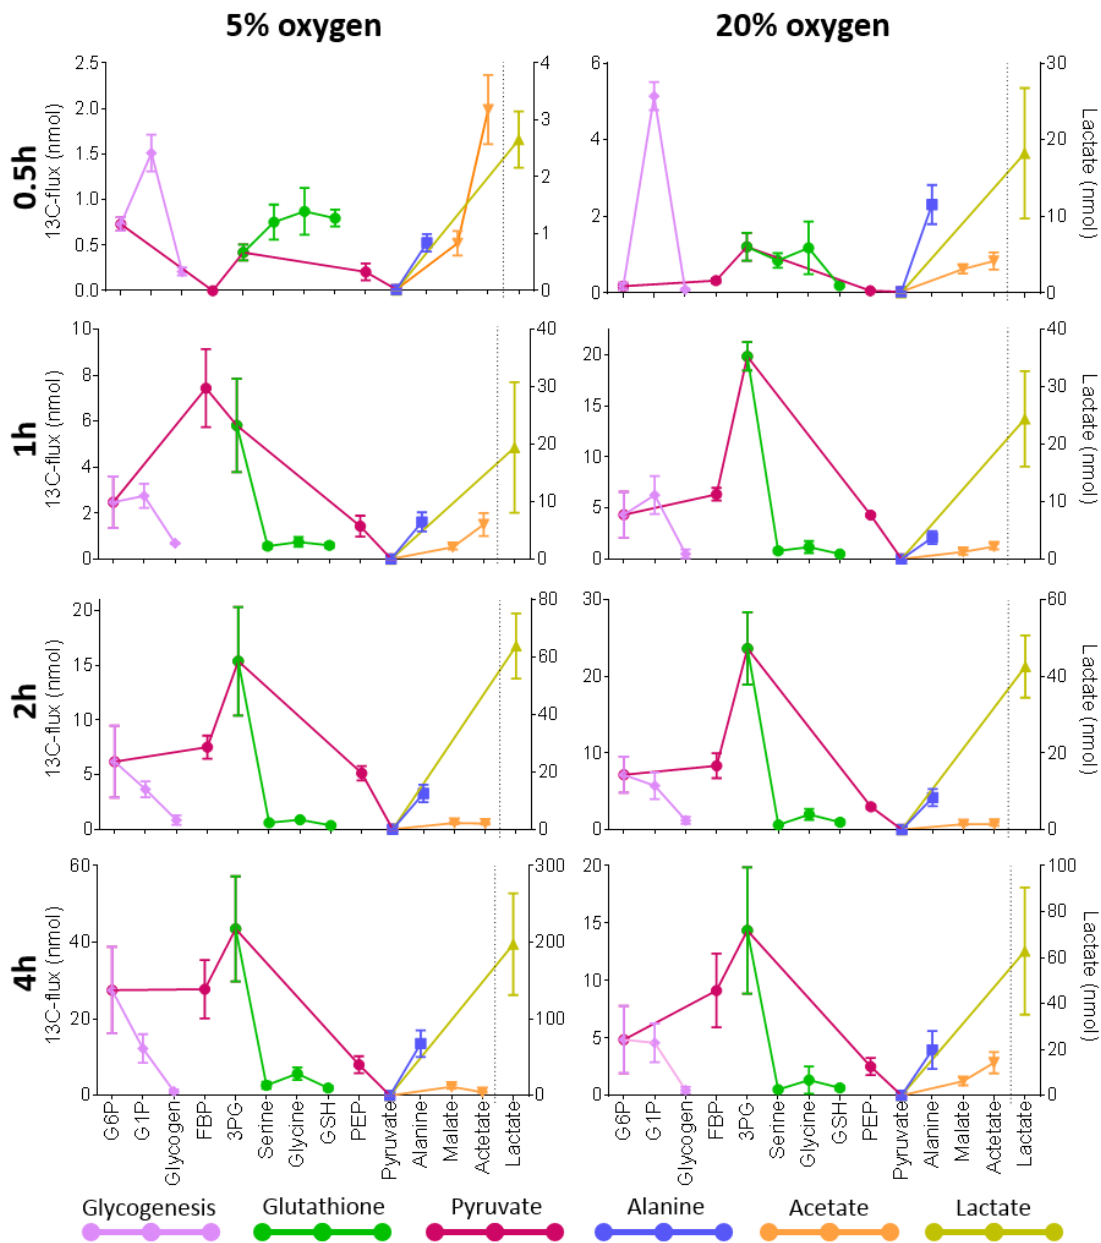

711

712 **Supplementary Figure 1. Carbon tracing through metabolic pathways.** Metabolite  
 713 pathways organised into functional groups contributing to the production of: glycogen,  
 714 glutathione, pyruvate, alanine, acetate, and lactate. Figures show the absolute levels of  
 715 intracellular glucose derivatives in MEL2 hPSC at 0.5, 1, 2 and 4 hours when cultured under  
 716 5% and 20% oxygen. Lactate is plotted on the right y-axes.

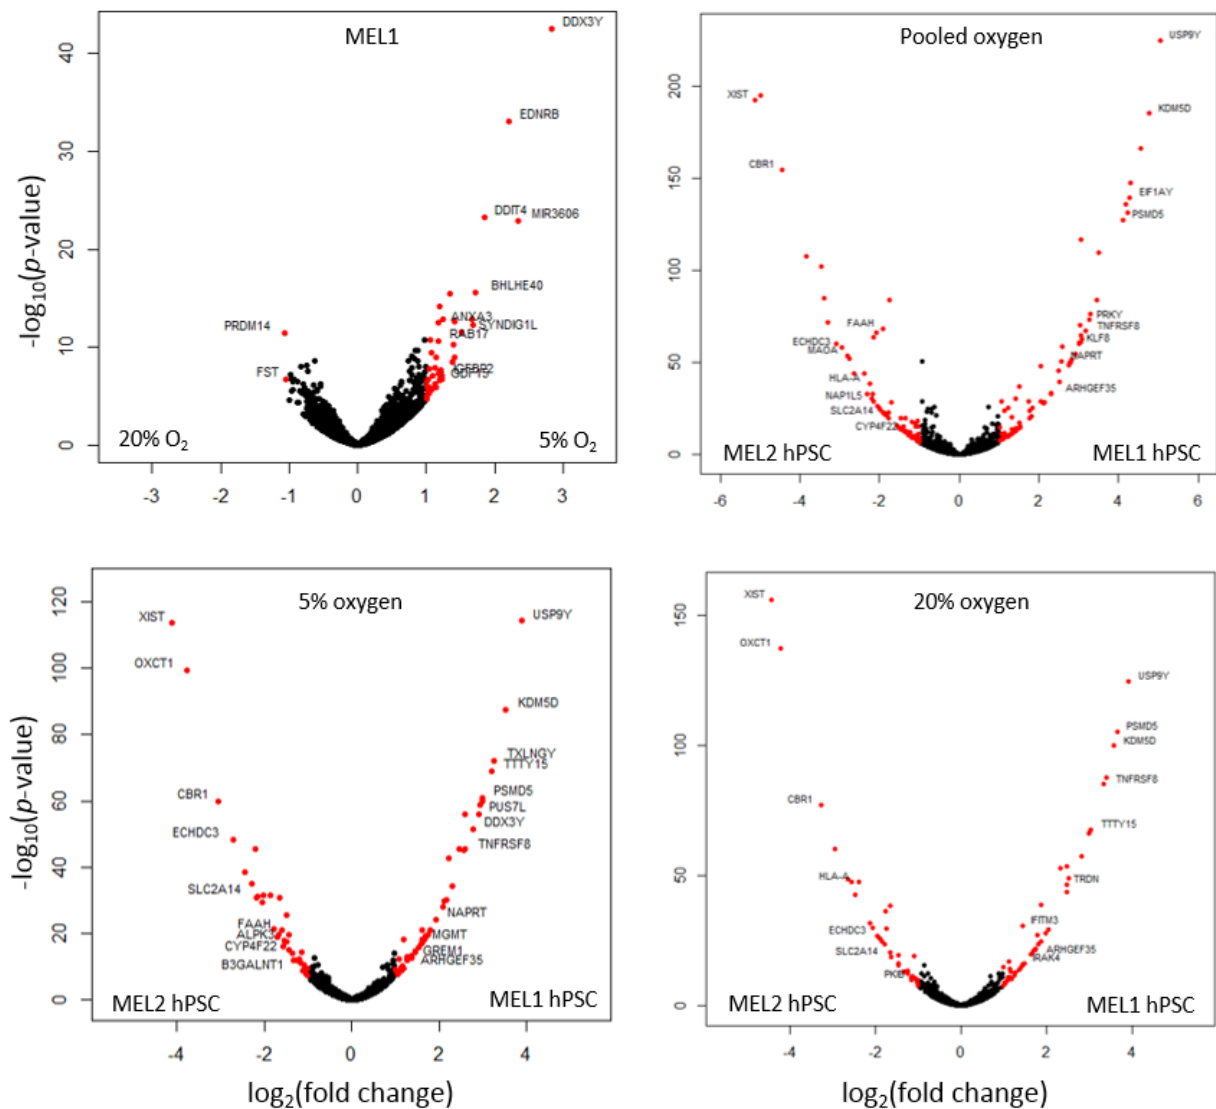

717  
 718 **Supplementary Figure 2. RNA-seq volcano plots of the hPSC response to oxygen.** Plots  
 719 from left to right, top to bottom are: the MEL1 hPSC transcriptional response to 5% and 205  
 720 oxygen, the transcriptional differences between hPSC lines at 5% oxygen, at 20% oxygen, and  
 721 when the oxygen treatments are pooled. Red genes indicate a fold change value greater than 2  
 722 and an adjusted p-value (Benjaminni FDR) less than 0.05.

**GO ANALYSIS**

**KEGG PATHWAY ANALYSIS**

**MEL2**

*Upregulated at 5% oxygen*

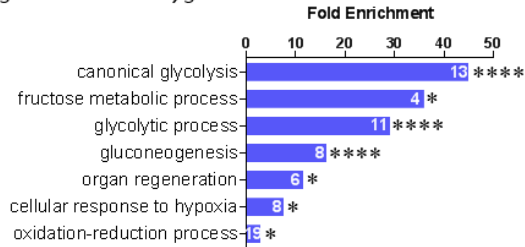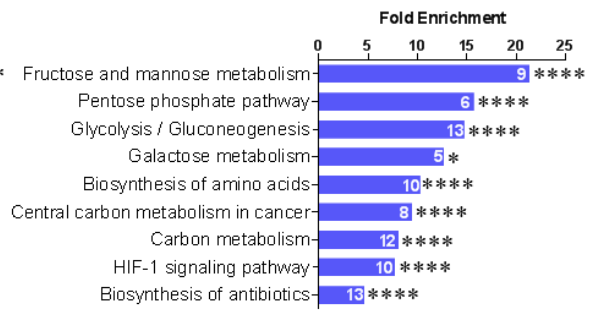

*Upregulated at 20% oxygen*

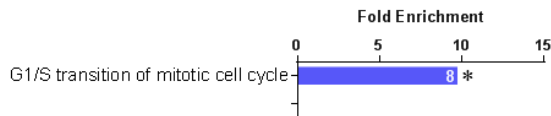

**MEL1**

*Upregulated at 5% oxygen*

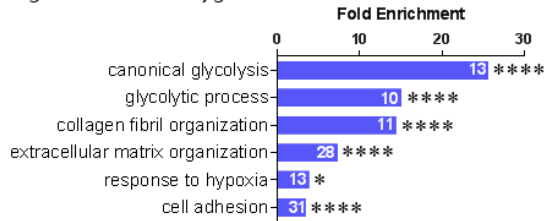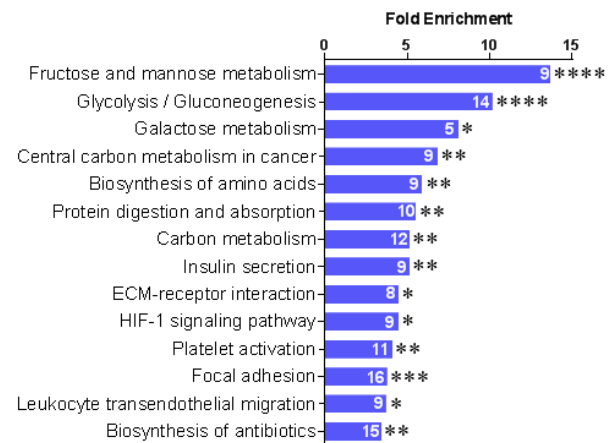

*Upregulated at 20% oxygen*

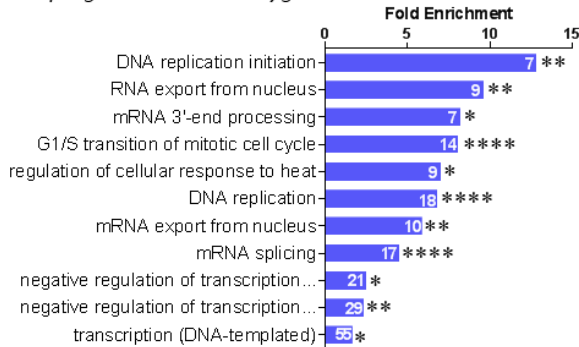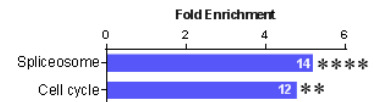

724 **Supplementary Figure 3. Enriched GO and KEGG pathways due to oxygen.** MEL1 and  
725 MEL2 hPSC GO and KEGG pathways upregulated after 5% and 20% oxygen culture. The  
726 contributing number of gene hits for each pathway are given with the ends of each bar. Only  
727 terms with a Benjamini score of  $< 0.05$  ( $p$ -adj) are shown. All assays performed in biological  
728 triplicate. \*\*\*\* $p < 0.0001$ , \*\*\* $p < 0.001$ , \*\* $p < 0.01$ , \* $p < 0.05$  for Benjamini score.

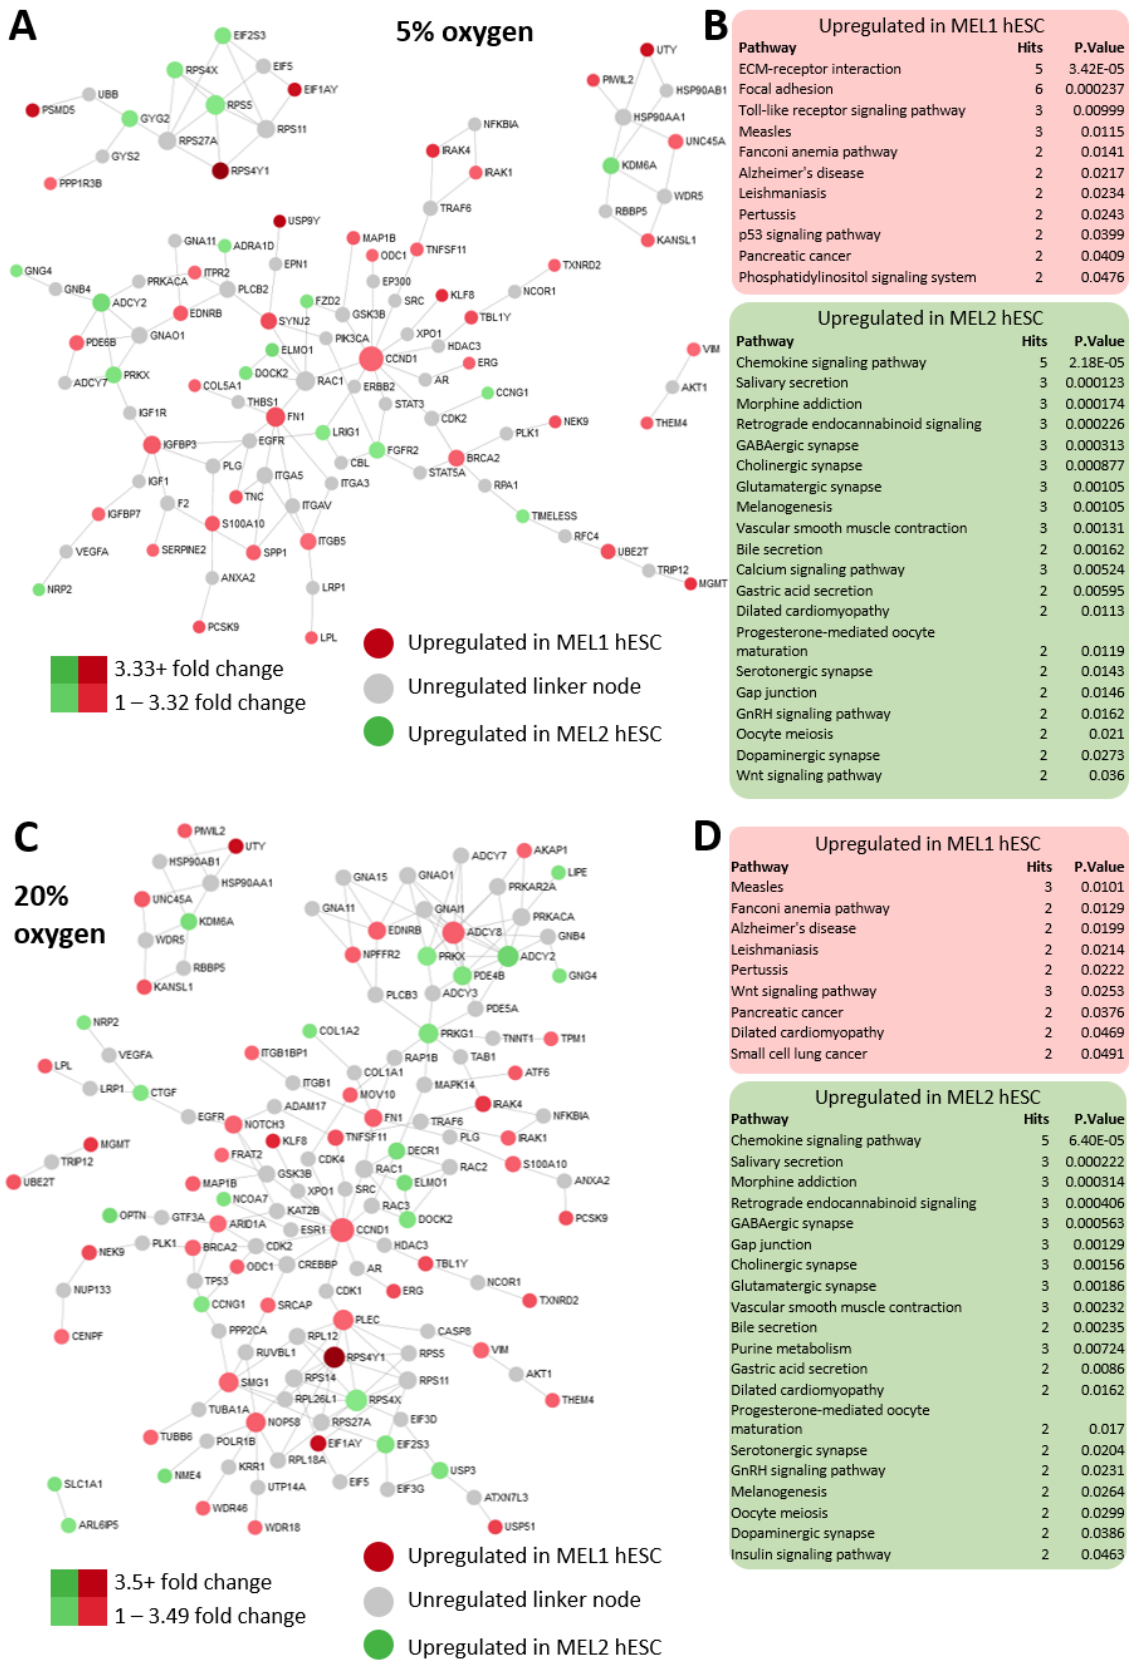

730 **Supplementary Figure 4. RNA-Seq minimum-order networks comparing hPSC lines.** (A)  
731 Differentially expressed genes in hPSC lines (MEL1, MEL2) cultured at 5% oxygen were  
732 connected based on known protein:protein interactions ([www.innatebd.ca](http://www.innatebd.ca)). Red nodes are  
733 upregulated in MEL1 hPSC; green nodes are upregulated in MEL2 hPSC. Grey nodes have  
734 known interactions with the seeds but were not regulated. Green/red intensity indicates the  
735 degree of fold change as indicated in the figure. (B) 5% oxygen cultured KEGG pathways  
736 upregulated in MEL1 and MEL2 hPSC based on the minimum-order network in  
737 Supplementary Fig. 2A. (C) 20% oxygen minimum-order, protein:protein interaction network.  
738 (D) 20% oxygen KEGG pathways upregulated in MEL1 and MEL2 hPSC based on the  
739 minimum-order network in Supplementary Fig. 2C.  
740

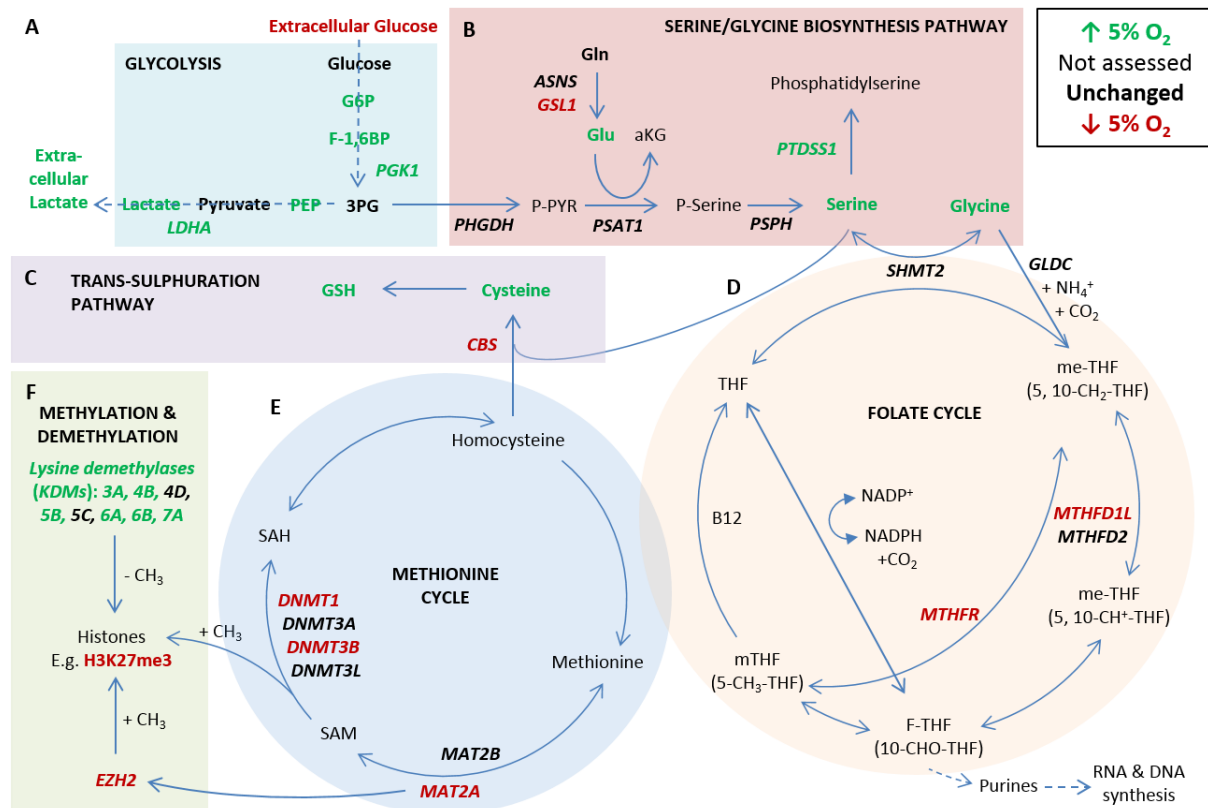

741  
 742 **Supplementary Figure 5. Methyltransferases and lysine demethylases synergistically**  
 743 **reduce methylation at 5% oxygen.** (A) Extracellular and intracellular levels of glycolytic  
 744 metabolites and glycolytic enzymes in hPSC. (B) Intracellular levels of metabolites and  
 745 enzymes in and related to the serine/glycine biosynthesis pathway. (C) Intercellular metabolite  
 746 levels of trans-sulphuration pathway metabolites. (D) Expression of metabolites, and  
 747 transcripts for enzymes, in the folate cycle. (E) Expression of metabolites, and transcripts for  
 748 enzymes, in the methionine cycle. (F) Level of H3K27 trimethylation, and transcripts for lysine  
 749 demethylases and methyltransferases. All contributing assays performed in a minimum of  
 750 biological triplicate. Bolded text indicates a significant increase (green) or decrease (red) in  
 751 hPSC metabolite/transcript/methylation level at 5% relative to 20% oxygen culture. Bolded  
 752 black text indicates a non-significant result for an assessed parameter. Unbolded text indicates  
 753 a parameter that was not assessed.

754 **Supplementary Tables**

755 **Supplementary Table 1** is an attached excel file containing qPCR data relating to  
 756 Supplementary Figure 5, and the 4 comparisons performed on RNA-Seq data comparing MEL1  
 757 hPSC at 5% and 20% oxygen, MEL2 hPSC at 5% and 20% oxygen, MEL1 and MEL2 hPSC  
 758 at 5% oxygen, and MEL1 and MEL2 hPSC at 20% oxygen.

759

760 **Supplementary Table 2.** Related to Experimental Procedures. Human PCR primers for the  
 761 serine/glycine biosynthesis pathway.

| Gene    | Size | Forward                  | Reverse                 |
|---------|------|--------------------------|-------------------------|
| RPLP0   | 106  | GGAGGGTGTCCGCAATGTT      | CAAGGCCAGGACTCGTTTGT    |
| ASNS    | 64   | GCAGCTGAAAGAAGCCCAAGT    | TGTCTCCATGCCAATTGCA     |
| CBS     | 151  | TCATCGTGATGCCAGAGAAG     | TTGGGGATTTCGTTCTTCAG    |
| GLDC    | 173  | AGGGAGCAACACATTCGGAG     | GCTCGCTTGAGACCTTCTGA    |
| GLS1    | 114  | AGGGTCTGTTACCTAGCTTGG    | ACGTTTCGCAATCCTGTAGATTT |
| MAT2A   | 287  | CCACGAGGCGTTCATCGAGG     | AAGTCTTGTAGTCAAAACCT    |
| MAT2B   | 121  | TGGGGAGCACTTGAAAGAG      | CTTAGCGGCAACATGGG       |
| MTHFD1L | 164  | GGGACTCCATCGTCAGAGAA     | G TTCAGACCAGCCTCCTCAG   |
| MTHFD2  | 189  | GCCTCCTTGTTCAAGTTCCT     | TTGGAATGCCAGTTCGCTTG    |
| MTHFR   | 173  | CGGGGAGACCCAATAGGTGA     | AAGTGCTTCAGGTCAGCCTC    |
| PSAT1   | 218  | AGAATCTTGTGCGGGAATTG     | CCCAAGTTTAGGGTGAACGA    |
| PHGDH   | 107  | ATCTCTCACGGGGTGTG        | AGGCTCGCATCAGTGTCC      |
| PTDSS1  | 220  | ATGTGATCACCTGGGAGAGG     | CCATTGCACAACAGGATGTC    |
| SHMT2   | 51   | AGTCTATGCCCTATAAGCTCAACC | GCCGAAAAGTCGAGCAGT      |

762
