# Supplementary material for: Oxygen Regulates Human Pluripotent Stem Cell Metabolic Flux
Source: Stem Cells Int. 2019 May 19;2019:8195614. doi: 10.1155/2019/8195614 (PMC6545818; doi:10.1155/2019/8195614)
Supplement: Supplementary 2 — Supplementary Table 1: an attached excel file containing qPCR data relating to Supplementary Figure 5 and the 4 comparisons performed on RNA-seq data comparing MEL1 hPSC at 5% and 20% oxygen, MEL2 hPSC at 5% and 20% oxygen, MEL1 and MEL2 hPSC at 5% oxygen, and MEL1 and MEL2 hPSC at 20% oxygen. [file 8195614.f2.xlsx]

## Sheet: qPRC data
Gene	Cell line	Fold change at 5% O2	SEM	P-value
ASNS	MEL1	1.2	0.086	0.151
ASNS	MEL2	1	0.048	0.803
CBS	MEL1	0.5	0.078	0.001
CBS	MEL2	0.2	0.124	0.004
GLDC	MEL1	2.2	0.811	0.201
GLDC	MEL2	0.7	0.169	0.099
GSL1	MEL1	1	0.066	0.905
GSL1	MEL2	0.6	0.122	0.022
MAT2A	MEL1	0.5	0.059	0
MAT2A	MEL2	0.5	0.071	0
MAT2B	MEL1	1	0.047	0.733
MAT2B	MEL2	1	0.101	0.66
MTHFD1L	MEL1	0.7	0.038	0.011
MTHFD1L	MEL2	0.4	0.082	0.001
MTHFD2	MEL1	1.2	0.149	0.19
MTHFD2	MEL2	0.9	0.084	0.472
MTHFR	MEL1	3	1.168	0.02
MTHFR	MEL2	0.3	0.119	0.016
PHGDH	MEL1	1.1	0.039	0.003
PHGDH	MEL2	1	0.029	0.308
PSAT1	MEL1	1.3	0.029	0.001
PSAT1	MEL2	0.6	0.093	0.068
SHMT2	MEL1	1.6	0.49	0.256
SHMT2	MEL2	0.8	0.115	0.174
PTDSS1	MEL1	2	0.725	0.023
PTDSS1	MEL2	1.9	0.408	0.017

## Sheet: MEL2 hPSC 5v20% O2
Gene ID	Base Mean	Log2(FC)	StdErr	Wald Stats	P value	Padj value
ENSG00000104327	185.739	-1.12911	0.199808	-5.651	1.6e-08	4.1e-06
ENSG00000166342	130.222	-1.04489	0.20727	-5.0412	4.63e-07	8.35e-05
ENSG00000177511	107.112	-1.01168	0.216374	-4.67561	2.93e-06	0.000418005
ENSG00000124160	337.984	-0.992227	0.196492	-5.0497	4.43e-07	8.11e-05
ENSG00000180573	117.914	-0.950489	0.225141	-4.22174	2.42e-05	0.00243102
ENSG00000135549	85.6669	-0.94712	0.222783	-4.25131	2.13e-05	0.00221785
ENSG00000107562	427.203	-0.882348	0.156386	-5.64211	1.68e-08	4.15e-06
ENSG00000102271	408.303	-0.873788	0.188785	-4.62848	3.68e-06	0.000501303
ENSG00000132294	604.651	-0.871945	0.154437	-5.64597	1.64e-08	4.13e-06
ENSG00000133863	219.963	-0.8514	0.187685	-4.53631	5.72e-06	0.00070912
ENSG00000134954	509.438	-0.840978	0.164983	-5.09736	3.44e-07	6.5e-05
ENSG00000120694	2331.81	-0.828477	0.153566	-5.39493	6.86e-08	1.42e-05
ENSG00000153993	37.8106	-0.810968	0.231717	-3.49981	0.000465584	0.0231637
ENSG00000171208	125.6	-0.808954	0.211988	-3.81603	0.000135614	0.00906637
ENSG00000038427	3702.41	-0.803776	0.11614	-6.92076	4.49e-12	2.14e-09
ENSG00000166105	610.538	-0.791758	0.171854	-4.60717	4.08e-06	0.000542502
ENSG00000156697	229.293	-0.784501	0.20296	-3.8653	0.000110951	0.00800093
ENSG00000169432	73.6032	-0.78115	0.225707	-3.46091	0.000538356	0.0254615
ENSG00000173930	69.1424	-0.780652	0.227437	-3.43239	0.000598284	0.0269459
ENSG00000204466	240.706	-0.779773	0.185037	-4.21414	2.51e-05	0.00245677
ENSG00000104112	757.782	-0.769997	0.162431	-4.74047	2.13e-06	0.000325825
ENSG00000240563	7029.9	-0.766663	0.14111	-5.43309	5.54e-08	1.2e-05
ENSG00000048540	222.64	-0.755944	0.183337	-4.12324	3.74e-05	0.00335333
ENSG00000171451	121.499	-0.75417	0.211609	-3.56398	0.000365273	0.0194203
ENSG00000100413	203.192	-0.752132	0.199117	-3.77734	0.000158515	0.0102831
ENSG00000188191	411.006	-0.746378	0.175903	-4.24312	2.2e-05	0.00226357
ENSG00000086061	2565.27	-0.743686	0.1548	-4.80418	1.55e-06	0.000246236
ENSG00000271430	40.6026	-0.741656	0.232443	-3.1907	0.00141928	0.048581
ENSG00000179546	107.278	-0.7343	0.212124	-3.46165	0.000536872	0.0254615
ENSG00000253507	105.665	-0.727435	0.215308	-3.37857	0.000728629	0.0303659
ENSG00000011677	141.148	-0.727313	0.202329	-3.5947	0.000324761	0.0175153
ENSG00000112146	264.358	-0.725921	0.186679	-3.88861	0.000100822	0.00748063
ENSG00000018236	239.939	-0.724721	0.179143	-4.0455	5.22e-05	0.00424176
ENSG00000144043	245.254	-0.722172	0.193886	-3.72473	0.000195527	0.0119513
ENSG00000011332	67.6073	-0.720282	0.230086	-3.1305	0.00174511	0.0562818
ENSG00000083799	163.917	-0.718054	0.197443	-3.63676	0.000276084	0.0154752
ENSG00000163873	37.3125	-0.71772	0.232462	-3.08747	0.00201866	0.0606955
ENSG00000198464	331.184	-0.715602	0.19713	-3.6301	0.000283311	0.0158112
ENSG00000103044	629.433	-0.710374	0.168257	-4.22195	2.42e-05	0.00243102
ENSG00000147231	58.9867	-0.708027	0.230503	-3.07166	0.00212874	0.0626244
ENSG00000121207	237.575	-0.702135	0.204839	-3.42775	0.000608614	0.0271256
ENSG00000116560	5167.59	-0.701688	0.144634	-4.85146	1.23e-06	0.00019913
ENSG00000132773	153.83	-0.698687	0.216543	-3.22654	0.00125295	0.0449242
ENSG00000162490	391.519	-0.697907	0.172697	-4.04123	5.32e-05	0.00429259
ENSG00000228592	535.242	-0.696334	0.166533	-4.18136	2.9e-05	0.00273489
ENSG00000129173	136.416	-0.691598	0.206334	-3.35184	0.000802777	0.0328104
ENSG00000260804	39.1256	-0.690705	0.232827	-2.9666	0.00301113	0.0761252
ENSG00000147601	5062.45	-0.690308	0.11651	-5.9249	3.12e-09	9.55e-07
ENSG00000165521	55.8289	-0.690044	0.230685	-2.99128	0.00277809	0.0725526
ENSG00000204381	61.3462	-0.689983	0.229306	-3.009	0.0026211	0.0700927
ENSG00000169258	164.446	-0.685403	0.206646	-3.3168	0.000910563	0.036074
ENSG00000168906	1564.63	-0.683755	0.229689	-2.97687	0.00291208	0.0746096
ENSG00000136450	3697.2	-0.681249	0.155052	-4.39368	1.11e-05	0.00127728
ENSG00000128191	310.965	-0.681167	0.186077	-3.66067	0.000251554	0.0144313
ENSG00000163389	208.995	-0.677745	0.197938	-3.42403	0.000616999	0.0273097
ENSG00000173673	114.769	-0.677291	0.21356	-3.17143	0.00151689	0.0507641
ENSG00000100479	239.811	-0.675965	0.19243	-3.51278	0.000443436	0.0221477
ENSG00000196922	183.834	-0.672088	0.203871	-3.29664	0.000978505	0.037605
ENSG00000184384	52.9598	-0.669971	0.231192	-2.8979	0.00375668	0.0879584
ENSG00000011198	153.738	-0.669816	0.20207	-3.31476	0.000917204	0.0362253
ENSG00000181938	187.615	-0.667984	0.19404	-3.4425	0.000576356	0.0264218
ENSG00000110172	780.06	-0.667363	0.150896	-4.42266	9.75e-06	0.00113763
ENSG00000176834	690.888	-0.665456	0.146806	-4.5329	5.82e-06	0.000711226
ENSG00000102924	59.3704	-0.663057	0.22938	-2.89064	0.00384453	0.0890766
ENSG00000084073	616.275	-0.661097	0.17271	-3.82779	0.000129299	0.00882811
ENSG00000102383	52.8754	-0.660197	0.23174	-2.84887	0.00438743	0.0974343
ENSG00000008735	39.0827	-0.656675	0.232696	-2.82203	0.00477202	0.10175
ENSG00000198604	272.461	-0.654752	0.184068	-3.55712	0.000374947	0.019552
ENSG00000021826	125.869	-0.654677	0.210687	-3.10735	0.00188775	0.0589361
ENSG00000135829	4940.68	-0.652962	0.147602	-4.4238	9.7e-06	0.00113763
ENSG00000182551	524.789	-0.647637	0.161712	-4.00489	6.2e-05	0.00494675
ENSG00000101868	713.41	-0.647548	0.163311	-3.96513	7.34e-05	0.00574152
ENSG00000132801	72.0607	-0.64308	0.227154	-2.83104	0.00463972	0.0999401
ENSG00000146376	106.384	-0.639757	0.213437	-2.99741	0.00272287	0.0715866
ENSG00000119906	316.228	-0.635798	0.17543	-3.62423	0.00028982	0.0161044
ENSG00000123505	3147.34	-0.635647	0.147902	-4.29775	1.73e-05	0.00184564
ENSG00000155755	384.363	-0.635535	0.172324	-3.68802	0.000226005	0.0134305
ENSG00000040531	128.232	-0.634171	0.205422	-3.08717	0.00202074	0.0606955
ENSG00000080709	163.597	-0.629013	0.196544	-3.20036	0.00137255	0.0474881
ENSG00000189057	150.255	-0.625856	0.222326	-2.81504	0.00487708	0.102964
ENSG00000118007	299.051	-0.625337	0.183458	-3.4086	0.000652964	0.0283157
ENSG00000088305	14856.5	-0.624655	0.112238	-5.56547	2.61e-08	6.1e-06
ENSG00000256294	52.4785	-0.622815	0.23136	-2.69197	0.00710311	0.128597
ENSG00000133636	99.2333	-0.619655	0.215469	-2.87585	0.00402944	0.0916277
ENSG00000115419	649.671	-0.619346	0.161193	-3.84225	0.000121909	0.00850261
ENSG00000163584	938.311	-0.619336	0.161244	-3.84098	0.000122545	0.00850261
ENSG00000130254	296.279	-0.619243	0.187578	-3.30125	0.00096254	0.0371123
ENSG00000043143	396.801	-0.618937	0.169346	-3.65487	0.000257308	0.0146142
ENSG00000079134	451.18	-0.618684	0.175679	-3.52167	0.000428843	0.0215868
ENSG00000226361	225.996	-0.616894	0.182301	-3.38394	0.000714541	0.0299425
ENSG00000171848	2056.86	-0.616131	0.223244	-2.7599	0.00578191	0.115065
ENSG00000196776	153.918	-0.615175	0.205907	-2.98764	0.00281145	0.0730521
ENSG00000141736	5489.83	-0.614023	0.146273	-4.19777	2.7e-05	0.0026015
ENSG00000152193	156.524	-0.613449	0.205259	-2.98866	0.00280201	0.0729546
ENSG00000128872	66.5762	-0.612838	0.22709	-2.69865	0.00696208	0.126939
ENSG00000181472	305.045	-0.611626	0.188898	-3.23787	0.00120425	0.0439142
ENSG00000142408	116.17	-0.611194	0.209024	-2.92404	0.00345521	0.0832103
ENSG00000164128	69.1913	-0.609934	0.22746	-2.68149	0.00732944	0.131195
ENSG00000229091	71.6995	-0.608379	0.231098	-2.63256	0.00847434	0.141164
ENSG00000167840	258.796	-0.607144	0.19456	-3.1206	0.00180482	0.0576285
ENSG00000029363	2643.81	-0.606768	0.151399	-4.00773	6.13e-05	0.00491823
ENSG00000161048	99.417	-0.605601	0.215474	-2.81055	0.00494569	0.103984
ENSG00000177058	360.247	-0.605291	0.164293	-3.68423	0.000229399	0.0135694
ENSG00000141141	673.883	-0.604475	0.167482	-3.60919	0.00030716	0.0167775
ENSG00000127720	52.1293	-0.604157	0.232941	-2.59361	0.00949749	0.149255
ENSG00000169288	186.708	-0.602438	0.198501	-3.03494	0.00240581	0.0672788
ENSG00000101180	38.7405	-0.601612	0.232836	-2.58385	0.00977057	0.150836
ENSG00000149294	79.9457	-0.601196	0.223011	-2.69581	0.00702172	0.127845
ENSG00000165156	42.9502	-0.600551	0.23294	-2.57813	0.00993369	0.150898
ENSG00000145246	50.6471	-0.598253	0.232281	-2.57555	0.010008	0.151127
ENSG00000271524	42.6827	-0.597402	0.232939	-2.56463	0.0103286	0.154161
ENSG00000087087	1657.66	-0.596142	0.151767	-3.92801	8.57e-05	0.00658341
ENSG00000040633	623.023	-0.593436	0.160545	-3.69638	0.000218699	0.0131794
ENSG00000113732	489.703	-0.593243	0.166595	-3.561	0.000369447	0.0194353
ENSG00000131467	2347.14	-0.589373	0.156935	-3.75553	0.000172977	0.010884
ENSG00000198157	329.829	-0.58807	0.173101	-3.39726	0.000680639	0.0292197
ENSG00000134508	208.68	-0.587684	0.18762	-3.13232	0.00173433	0.0560753
ENSG00000248329	715.432	-0.587303	0.15031	-3.90728	9.33e-05	0.00704782
ENSG00000150594	52.7015	-0.585948	0.231819	-2.52761	0.0114841	0.165073
ENSG00000092439	754.394	-0.584043	0.14401	-4.05557	5e-05	0.00417831
ENSG00000173041	22.6143	-0.582693	0.223354	-2.60883	0.00908515	NA
ENSG00000145362	310.58	-0.582425	0.173806	-3.35101	0.000805178	0.0328104
ENSG00000137713	1037.98	-0.582155	0.152308	-3.82222	0.000132258	0.00888826
ENSG00000184886	261.676	-0.581991	0.193992	-3.00008	0.00269909	0.0712871
ENSG00000198000	305.115	-0.581605	0.173534	-3.35153	0.000803662	0.0328104
ENSG00000136098	195.728	-0.581524	0.18737	-3.10362	0.00191169	0.0591289
ENSG00000017483	288.526	-0.580773	0.192648	-3.01469	0.00257241	0.0692233
ENSG00000013503	223.253	-0.579035	0.206317	-2.80654	0.00500773	0.10486
ENSG00000184481	394.89	-0.578121	0.166573	-3.47066	0.000519172	0.025053
ENSG00000128000	103.451	-0.576841	0.216235	-2.66766	0.00763807	0.134611
ENSG00000044574	6578.92	-0.576722	0.14622	-3.94421	8.01e-05	0.00622834
ENSG00000037897	132.468	-0.575068	0.208208	-2.76199	0.00574508	0.114509
ENSG00000129255	557.761	-0.575055	0.152282	-3.77626	0.000159201	0.0102831
ENSG00000174718	1210.59	-0.573971	0.132958	-4.31692	1.58e-05	0.00172113
ENSG00000067369	1164.24	-0.573085	0.151546	-3.7816	0.000155824	0.0102572
ENSG00000162231	503.008	-0.572803	0.174047	-3.29108	0.000998025	0.0379744
ENSG00000196247	285.966	-0.572593	0.183223	-3.12511	0.00177737	0.0568936
ENSG00000138778	608.613	-0.572564	0.153601	-3.72761	0.000193301	0.0118841
ENSG00000139116	730.453	-0.571608	0.152738	-3.74241	0.000182262	0.0114123
ENSG00000146674	72.3924	-0.569999	0.225206	-2.53101	0.0113734	0.164402
ENSG00000175093	164.015	-0.569016	0.198249	-2.87021	0.00410199	0.0929069
ENSG00000142149	180.986	-0.567367	0.196843	-2.88233	0.00394743	0.0906274
ENSG00000167114	239.68	-0.566943	0.193089	-2.93617	0.00332292	0.0805701
ENSG00000113407	4231.9	-0.566255	0.148445	-3.81458	0.000136416	0.0090727
ENSG00000168646	160.382	-0.56553	0.196668	-2.87556	0.00403316	0.0916277
ENSG00000108312	1406.82	-0.563558	0.134699	-4.18382	2.87e-05	0.00272547
ENSG00000007062	920.512	-0.562939	0.136284	-4.13063	3.62e-05	0.00327017
ENSG00000213341	303.858	-0.562898	0.180562	-3.11747	0.00182411	0.0578178
ENSG00000168806	128.092	-0.55959	0.213097	-2.62598	0.00863991	0.142731
ENSG00000141314	240.013	-0.55909	0.183786	-3.04206	0.00234962	0.0661398
ENSG00000132286	346.248	-0.558012	0.172634	-3.23234	0.0012278	0.0442696
ENSG00000142686	127.176	-0.557744	0.208554	-2.67434	0.0074877	0.133119
ENSG00000269404	24.9579	-0.557699	0.215567	-2.58713	0.00967787	0.150394
ENSG00000135315	105.831	-0.557658	0.214595	-2.59865	0.00935899	0.147946
ENSG00000265579	25.9745	-0.555839	0.227104	-2.44751	0.0143849	0.183409
ENSG00000128951	1001.72	-0.55487	0.142953	-3.88148	0.000103822	0.00765678
ENSG00000163735	69.8354	-0.554483	0.227148	-2.44107	0.0146439	0.185374
ENSG00000165259	92.1739	-0.554281	0.223784	-2.47685	0.0132546	0.176124
ENSG00000158966	905.894	-0.553096	0.142658	-3.87707	0.00010572	0.00771037
ENSG00000128833	302.672	-0.551604	0.178103	-3.09711	0.00195415	0.0598652
ENSG00000185432	217.363	-0.55156	0.193916	-2.84432	0.00445064	0.0979914
ENSG00000063176	290.36	-0.551489	0.181975	-3.03057	0.00244092	0.0676708
ENSG00000120800	1217	-0.551093	0.143577	-3.83831	0.000123885	0.00854941
ENSG00000055130	1296.26	-0.550595	0.15042	-3.66038	0.000251839	0.0144313
ENSG00000023041	284.88	-0.549091	0.189487	-2.89778	0.00375811	0.0879584
ENSG00000109971	22192	-0.548784	0.217255	-2.52599	0.0115372	0.165498
ENSG00000165338	191.338	-0.548671	0.20201	-2.71605	0.00660651	0.123257
ENSG00000130193	47.8277	-0.548457	0.232305	-2.36093	0.0182292	0.207322
ENSG00000171724	1424.85	-0.547853	0.149165	-3.6728	0.000239909	0.0140148
ENSG00000155886	79.4887	-0.547664	0.225216	-2.43173	0.015027	0.188182
ENSG00000122483	118.586	-0.543614	0.208058	-2.61281	0.00898025	0.14536
ENSG00000256304	53.3006	-0.543145	0.23099	-2.35138	0.0187038	0.209313
ENSG00000112031	69.2635	-0.541397	0.228761	-2.36664	0.0179502	0.205641
ENSG00000158882	118.16	-0.539975	0.21457	-2.51655	0.011851	0.166615
ENSG00000163214	560.645	-0.539129	0.157665	-3.41947	0.000627432	0.0275812
ENSG00000119812	1154.59	-0.535222	0.152147	-3.5178	0.000435141	0.0218183
ENSG00000154080	100.289	-0.535135	0.217735	-2.45774	0.0139815	0.18055
ENSG00000138821	306.019	-0.534727	0.171555	-3.11694	0.00182738	0.0578178
ENSG00000115568	273.12	-0.534561	0.174729	-3.05938	0.00221799	0.0635494
ENSG00000102786	372.251	-0.533826	0.169041	-3.15797	0.0015887	0.0522885
ENSG00000112149	68.1454	-0.533357	0.228494	-2.33423	0.0195838	0.213831
ENSG00000110721	378.21	-0.532805	0.19478	-2.73542	0.00623015	0.119358
ENSG00000187955	597.957	-0.532218	0.14599	-3.64559	0.000266784	0.0150856
ENSG00000184178	127.475	-0.53121	0.207869	-2.55551	0.0106033	0.156983
ENSG00000181019	304.626	-0.530191	0.187147	-2.83302	0.00461107	0.0999401
ENSG00000085491	541.046	-0.530031	0.154184	-3.43766	0.000586766	0.0266139
ENSG00000128606	30.9893	-0.530006	0.227403	-2.33069	0.0197699	0.214692
ENSG00000198846	160.999	-0.529201	0.19608	-2.6989	0.00695693	0.126939
ENSG00000135547	139.087	-0.528178	0.201288	-2.62399	0.00869058	0.143128
ENSG00000153071	74.3896	-0.528044	0.225297	-2.34377	0.01909	0.211059
ENSG00000166411	132.613	-0.527491	0.220415	-2.39317	0.0167036	0.198852
ENSG00000111371	4632.12	-0.52682	0.139729	-3.77031	0.000163045	0.0104378
ENSG00000081803	329.293	-0.526347	0.174094	-3.02336	0.00249988	0.0687118
ENSG00000143028	23.2733	-0.526273	0.224151	-2.34784	0.0188824	NA
ENSG00000163714	2140.83	-0.526138	0.159152	-3.30588	0.000946778	0.0370514
ENSG00000152795	3411.44	-0.525982	0.139299	-3.77591	0.000159421	0.0102831
ENSG00000269837	119.512	-0.525855	0.210077	-2.50316	0.0123091	0.168748
ENSG00000152518	670.779	-0.52522	0.143015	-3.67249	0.000240203	0.0140148
ENSG00000228716	753.477	-0.52509	0.162938	-3.22263	0.00127021	0.0451647
ENSG00000197498	793.53	-0.525014	0.150603	-3.48607	0.000490169	0.0240145
ENSG00000136859	136.075	-0.52439	0.202104	-2.59466	0.00946855	0.14915
ENSG00000142875	482.324	-0.523499	0.170616	-3.06829	0.00215286	0.0626928
ENSG00000166106	55.8727	-0.522909	0.230378	-2.26979	0.0232206	0.233406
ENSG00000234420	71.6771	-0.521862	0.229967	-2.26928	0.023251	0.233529
ENSG00000169490	433.966	-0.521589	0.168274	-3.09965	0.00193752	0.0596404
ENSG00000086712	1049.6	-0.521445	0.155533	-3.35263	0.000800486	0.0328104
ENSG00000037474	1220.3	-0.521232	0.155879	-3.34383	0.000826294	0.0333532
ENSG00000263002	71.919	-0.521121	0.224874	-2.31739	0.0204826	0.218577
ENSG00000183527	569.916	-0.520043	0.175851	-2.9573	0.00310344	0.0778042
ENSG00000178343	15.4345	-0.519483	0.204476	-2.54056	0.0110676	NA
ENSG00000176204	78.1831	-0.519434	0.223182	-2.3274	0.019944	0.21544
ENSG00000148297	697.91	-0.518579	0.150785	-3.4392	0.000583427	0.0265563
ENSG00000117593	469.788	-0.516666	0.167676	-3.08133	0.00206081	0.0613749
ENSG00000169116	101.555	-0.515821	0.214891	-2.40038	0.016378	0.197101
ENSG00000164082	49.8497	-0.515818	0.232697	-2.2167	0.0266437	0.251554
ENSG00000075461	38.0935	-0.515404	0.232772	-2.2142	0.026815	0.252106
ENSG00000198890	438.391	-0.514843	0.174755	-2.94608	0.00321826	0.0790248
ENSG00000267383	61.6353	-0.514283	0.228666	-2.24906	0.0245086	0.241817
ENSG00000101198	28.0242	-0.513769	0.22905	-2.24304	0.0248943	0.24374
ENSG00000177519	31.2132	-0.512773	0.230852	-2.22123	0.0263357	0.250033
ENSG00000105792	33.2413	-0.512251	0.231004	-2.2175	0.0265888	0.251506
ENSG00000138074	1320.72	-0.511928	0.145068	-3.52887	0.000417336	0.0212576
ENSG00000247498	35.0738	-0.511503	0.232039	-2.20439	0.0274972	0.253014
ENSG00000257621	121.164	-0.511439	0.20998	-2.43566	0.0148646	0.187798
ENSG00000211455	817.97	-0.509307	0.137572	-3.70212	0.000213808	0.0130068
ENSG00000184164	171.597	-0.509212	0.19514	-2.60947	0.00906824	0.145542
ENSG00000171503	87.1223	-0.509198	0.222808	-2.28537	0.0222912	0.228356
ENSG00000109184	549.421	-0.509077	0.1764	-2.88593	0.00390261	0.0899351
ENSG00000198814	43.3568	-0.508832	0.232868	-2.18507	0.028884	0.258907
ENSG00000143493	405.421	-0.508756	0.167033	-3.04585	0.00232025	0.0654567
ENSG00000189050	30.1996	-0.508135	0.230548	-2.20404	0.0275219	0.253059
ENSG00000178295	225.345	-0.507997	0.187612	-2.70771	0.00677501	0.12459
ENSG00000170836	225.238	-0.507245	0.182092	-2.78565	0.00534211	0.10953
ENSG00000113273	301.723	-0.506878	0.179153	-2.8293	0.00466493	0.100132
ENSG00000196417	133.175	-0.506496	0.209855	-2.41356	0.0157977	0.192968
ENSG00000145348	188.121	-0.506348	0.19327	-2.6199	0.0087956	0.144005
ENSG00000169598	77.1766	-0.505919	0.224885	-2.24968	0.0244692	0.241817
ENSG00000137776	1454.73	-0.505309	0.232934	-2.16932	0.0300584	0.26235
ENSG00000090612	237.815	-0.505111	0.18911	-2.67099	0.00756279	0.133898
ENSG00000000460	276.819	-0.504841	0.1837	-2.74818	0.0059928	0.116925
ENSG00000141179	188.284	-0.50408	0.191412	-2.63349	0.00845135	0.141068
ENSG00000143624	846.236	-0.502992	0.141725	-3.54906	0.000386608	0.0200101
ENSG00000142002	357.681	-0.502977	0.168913	-2.97773	0.00290389	0.074578
ENSG00000184500	39.008	-0.502429	0.232864	-2.15761	0.0309581	0.265273
ENSG00000111145	107.455	-0.501801	0.214729	-2.3369	0.0194443	0.212958
ENSG00000169851	69.8459	-0.501578	0.228985	-2.19044	0.0284922	0.258177
ENSG00000164209	266.648	-0.501252	0.17995	-2.7855	0.00534446	0.10953
ENSG00000105173	396.37	-0.500024	0.172304	-2.90198	0.00370811	0.0877499
ENSG00000111731	794.204	-0.499894	0.146581	-3.41037	0.000648754	0.0282285
ENSG00000145087	80.1526	-0.499527	0.228457	-2.18653	0.028777	0.258671
ENSG00000164815	281.187	-0.499242	0.180469	-2.76636	0.00566854	0.113159
ENSG00000116455	448.58	-0.498232	0.165474	-3.01093	0.00260447	0.0699393
ENSG00000109066	264.425	-0.498225	0.174881	-2.84895	0.00438644	0.0974343
ENSG00000130177	990.755	-0.498212	0.14531	-3.42862	0.000606654	0.0271256
ENSG00000198440	33.1827	-0.497669	0.228643	-2.17662	0.0295092	0.260509
ENSG00000160072	244.224	-0.497421	0.181911	-2.73442	0.00624907	0.119543
ENSG00000101846	38.8781	-0.497263	0.231226	-2.15055	0.0315114	0.268579
ENSG00000166801	269.049	-0.497182	0.18114	-2.74474	0.00605583	0.116925
ENSG00000111077	48.0611	-0.496887	0.232279	-2.13918	0.0324207	0.273107
ENSG00000124787	121.096	-0.495486	0.21799	-2.27298	0.0230273	0.232543
ENSG00000263606	38.3662	-0.493999	0.232487	-2.12485	0.0335994	0.277347
ENSG00000183833	34.2187	-0.493459	0.231976	-2.1272	0.0334036	0.276269
ENSG00000092068	2596.39	-0.492934	0.127815	-3.85661	0.000114971	0.00819873
ENSG00000184012	114.706	-0.492772	0.210524	-2.3407	0.0192479	0.211684
ENSG00000057252	70.2322	-0.49228	0.226817	-2.17038	0.0299781	0.262303
ENSG00000123136	784.505	-0.491088	0.151392	-3.24381	0.00117944	0.0436709
ENSG00000081138	14.7242	-0.491062	0.207665	-2.36469	0.0180454	NA
ENSG00000151461	727.093	-0.490697	0.141732	-3.46215	0.000535872	0.0254615
ENSG00000196584	342.887	-0.490453	0.197502	-2.48328	0.0130178	0.174605
ENSG00000197256	365.169	-0.490257	0.16223	-3.02199	0.00251115	0.0687794
ENSG00000104218	149.691	-0.49012	0.20415	-2.40079	0.0163599	0.197101
ENSG00000066279	1133.62	-0.489993	0.132734	-3.69154	0.000222901	0.0133077
ENSG00000086827	394.195	-0.489881	0.172648	-2.83745	0.0045475	0.0989352
ENSG00000103047	244.812	-0.489825	0.187748	-2.60894	0.00908221	0.145542
ENSG00000176920	61.8954	-0.489805	0.230546	-2.12455	0.0336244	0.277347
ENSG00000101265	206.874	-0.489769	0.185329	-2.6427	0.00822488	0.139119
ENSG00000234964	73.4902	-0.489685	0.226789	-2.1592	0.0308343	0.265218
ENSG00000171791	38.6164	-0.489457	0.232804	-2.10244	0.0355145	0.283804
ENSG00000171497	570.168	-0.489441	0.158985	-3.07854	0.00208016	0.0616649
ENSG00000117318	1163.87	-0.488782	0.152451	-3.20615	0.00134525	0.0467957
ENSG00000213976	65.7553	-0.488628	0.228307	-2.14022	0.0323367	0.273075
ENSG00000089057	378.053	-0.488183	0.171074	-2.85363	0.00432225	0.0964876
ENSG00000085999	502.134	-0.488018	0.156835	-3.11167	0.00186033	0.0585275
ENSG00000139998	802.104	-0.487981	0.160629	-3.03793	0.00238207	0.0667605
ENSG00000269962	61.9171	-0.487738	0.231784	-2.10428	0.0353541	0.283804
ENSG00000136492	463.027	-0.487674	0.158307	-3.08056	0.00206615	0.0613913
ENSG00000184408	137.457	-0.487225	0.204138	-2.38674	0.0169984	0.199809
ENSG00000104611	52.5305	-0.487168	0.231414	-2.10518	0.0352759	0.283728
ENSG00000101442	140.273	-0.486872	0.203054	-2.39775	0.016496	0.197705
ENSG00000249459	42.0416	-0.486747	0.232925	-2.08972	0.0366433	0.285676
ENSG00000168890	146.885	-0.486182	0.19885	-2.44497	0.0144865	0.184108
ENSG00000186638	88.2299	-0.485916	0.21896	-2.2192	0.0264732	0.250782
ENSG00000184378	32.0399	-0.485617	0.231446	-2.09818	0.0358888	0.283804
ENSG00000149970	212.775	-0.485555	0.187219	-2.59352	0.00949994	0.149255
ENSG00000160193	264.71	-0.485365	0.176357	-2.75217	0.00592025	0.116196
ENSG00000007392	536.589	-0.484938	0.152788	-3.17392	0.00150396	0.0507632
ENSG00000219682	36.9937	-0.484732	0.232672	-2.08333	0.0372215	0.287431
ENSG00000132434	163.454	-0.484637	0.203486	-2.38167	0.0172345	0.201294
ENSG00000167799	22.6684	-0.483575	0.224269	-2.15623	0.0310656	NA
ENSG00000183023	32.159	-0.48312	0.229652	-2.1037	0.0354047	0.283804
ENSG00000162664	565.736	-0.482262	0.160919	-2.99693	0.00272716	0.0715866
ENSG00000034063	254.617	-0.481671	0.197268	-2.44171	0.0146179	0.185228
ENSG00000164251	349.85	-0.481364	0.163883	-2.93724	0.00331151	0.0805047
ENSG00000122965	474.487	-0.481093	0.168985	-2.84696	0.00441392	0.0978533
ENSG00000156398	164.678	-0.481031	0.208176	-2.31069	0.0208498	0.220089
ENSG00000143315	134.104	-0.480329	0.20834	-2.30551	0.021138	0.221492
ENSG00000134569	307.554	-0.480328	0.168016	-2.85883	0.00425203	0.0950855
ENSG00000107262	327.814	-0.480225	0.187755	-2.55772	0.0105361	0.156711
ENSG00000182010	453.44	-0.479951	0.174746	-2.74657	0.00602228	0.116925
ENSG00000110104	383.802	-0.479723	0.159102	-3.01518	0.00256825	0.0692233
ENSG00000155115	452.722	-0.478812	0.158794	-3.0153	0.00256724	0.0692233
ENSG00000110442	224.664	-0.478547	0.192842	-2.48155	0.0130813	0.175238
ENSG00000184809	106.93	-0.478439	0.212451	-2.25199	0.0243227	0.2409
ENSG00000173406	159.913	-0.478186	0.19608	-2.43874	0.0147387	0.18639
ENSG00000141076	1109.29	-0.478132	0.150907	-3.1684	0.00153282	0.0508406
ENSG00000168066	2910.68	-0.477926	0.12498	-3.82403	0.000131289	0.00888826
ENSG00000130558	412.287	-0.477513	0.157508	-3.03167	0.00243201	0.0675699
ENSG00000115840	111.521	-0.477399	0.216683	-2.20322	0.0275795	0.253407
ENSG00000136824	742.109	-0.477333	0.157355	-3.03348	0.00241753	0.0674597
ENSG00000139209	200.343	-0.476802	0.188178	-2.53378	0.011284	0.163847
ENSG00000109956	364.902	-0.476328	0.168982	-2.81881	0.00482028	0.101933
ENSG00000159720	408.954	-0.476208	0.170024	-2.80083	0.0050972	0.106387
ENSG00000083812	39.7531	-0.476171	0.232937	-2.04421	0.0409331	0.300859
ENSG00000141522	750.615	-0.476124	0.149958	-3.17505	0.00149811	0.0507379
ENSG00000124193	1526.72	-0.476008	0.225434	-2.11152	0.0347274	0.281821
ENSG00000134294	5785.17	-0.475892	0.129453	-3.67617	0.000236762	0.0139407
ENSG00000177108	560.026	-0.475657	0.148937	-3.19368	0.0014047	0.0482104
ENSG00000267161	22.4464	-0.475286	0.220835	-2.15223	0.0313795	NA
ENSG00000111087	160.467	-0.475075	0.196713	-2.41507	0.0157322	0.19269
ENSG00000110092	1044.24	-0.474089	0.139865	-3.38962	0.000699889	0.0296494
ENSG00000187325	558.149	-0.473823	0.16084	-2.94593	0.00321985	0.0790248
ENSG00000145833	1741.16	-0.473682	0.132427	-3.57691	0.000347673	0.0185947
ENSG00000149798	158.577	-0.473513	0.200471	-2.362	0.0181768	0.207209
ENSG00000168259	1000.57	-0.472855	0.159417	-2.96614	0.00301562	0.0761252
ENSG00000185298	344.73	-0.472738	0.17334	-2.72723	0.00638693	0.120716
ENSG00000099783	4288.77	-0.472148	0.222804	-2.11912	0.0340805	0.279595
ENSG00000106993	254.283	-0.471719	0.180223	-2.61742	0.00885981	0.144526
ENSG00000130935	1228.09	-0.471684	0.154457	-3.05381	0.00225954	0.0640254
ENSG00000140157	578.231	-0.471529	0.150371	-3.13578	0.00171397	0.0556069
ENSG00000129646	19.4202	-0.470013	0.218095	-2.15508	0.0311555	NA
ENSG00000163507	538.797	-0.469888	0.179664	-2.61537	0.00891298	0.145187
ENSG00000114867	6019.84	-0.469441	0.124702	-3.76451	0.000166874	0.0106039
ENSG00000101347	669.467	-0.469422	0.156946	-2.99097	0.00278092	0.0725526
ENSG00000173914	242.488	-0.468563	0.181077	-2.58765	0.00966333	0.15035
ENSG00000104267	49.3578	-0.4675	0.232083	-2.01436	0.0439714	0.313217
ENSG00000213190	507.812	-0.467497	0.153791	-3.03981	0.00236725	0.0664901
ENSG00000163481	178.008	-0.467449	0.193777	-2.41231	0.0158517	0.193048
ENSG00000231607	15.4921	-0.467413	0.210164	-2.22404	0.0261456	NA
ENSG00000105993	1470.5	-0.467177	0.141417	-3.30355	0.000954691	0.0371123
ENSG00000175283	198.897	-0.466656	0.201804	-2.31243	0.0207542	0.219803
ENSG00000078269	167.693	-0.466048	0.197761	-2.35662	0.018442	0.208382
ENSG00000163104	1213.4	-0.465997	0.150853	-3.08908	0.00200776	0.0606955
ENSG00000188227	115.354	-0.465991	0.213614	-2.18147	0.029149	0.260012
ENSG00000081087	256.584	-0.46553	0.176848	-2.63237	0.00847905	0.141164
ENSG00000197136	545.728	-0.465334	0.146941	-3.1668	0.00154125	0.0509884
ENSG00000114805	282.222	-0.465074	0.173049	-2.68752	0.00719849	0.129635
ENSG00000164591	242.047	-0.464782	0.185694	-2.50294	0.0123166	0.168748
ENSG00000169282	31.0825	-0.464661	0.230439	-2.01642	0.0437562	0.312726
ENSG00000139974	45.0063	-0.464431	0.232751	-1.9954	0.045999	0.320197
ENSG00000139531	255.279	-0.464392	0.174869	-2.65566	0.00791527	0.135643
ENSG00000133794	92.2109	-0.464291	0.222412	-2.08753	0.0368403	0.286249
ENSG00000186019	8.31508	-0.464199	0.173444	-2.67636	0.00744262	NA
ENSG00000148019	490.6	-0.463695	0.166157	-2.79071	0.00525927	0.108884
ENSG00000004866	171.646	-0.463596	0.195288	-2.3739	0.0176011	0.202808
ENSG00000198885	139.074	-0.463547	0.211065	-2.19623	0.0280758	0.255557
ENSG00000132646	2778.78	-0.463247	0.1391	-3.33032	0.000867472	0.0345803
ENSG00000184307	118.872	-0.463049	0.208438	-2.22152	0.0263155	0.250033
ENSG00000067533	548.841	-0.462554	0.162812	-2.84104	0.0044967	0.0981013
ENSG00000198131	467.555	-0.461882	0.169417	-2.7263	0.0064048	0.120723
ENSG00000122952	796.318	-0.46156	0.15282	-3.02028	0.00252543	0.0688248
ENSG00000075292	1758.54	-0.461203	0.135379	-3.40676	0.000657385	0.0284114
ENSG00000184588	153.949	-0.46109	0.206224	-2.23587	0.02536	0.245451
ENSG00000053770	454.723	-0.460882	0.172938	-2.66502	0.00769845	0.134611
ENSG00000186792	27.7356	-0.460226	0.224208	-2.05267	0.0401045	0.299094
ENSG00000256463	157.889	-0.459924	0.195759	-2.34944	0.0188014	0.209674
ENSG00000185070	66.1284	-0.459054	0.226871	-2.02342	0.0430303	0.308741
ENSG00000087269	509.912	-0.458586	0.168556	-2.72068	0.00651474	0.1219
ENSG00000085552	295.482	-0.458153	0.173085	-2.64698	0.00812141	0.138626
ENSG00000118922	207.833	-0.458033	0.192363	-2.38109	0.0172615	0.201426
ENSG00000196700	358.772	-0.457926	0.164706	-2.78027	0.00543144	0.109965
ENSG00000173705	69.6634	-0.457341	0.225704	-2.02628	0.0427357	0.307816
ENSG00000213593	713.833	-0.456175	0.143888	-3.17034	0.00152261	0.0507641
ENSG00000206190	34.9517	-0.454916	0.231144	-1.9681	0.049056	0.332111
ENSG00000218418	42.8768	-0.454831	0.23285	-1.95332	0.0507818	0.336866
ENSG00000172348	130.827	-0.454763	0.211954	-2.14557	0.0319073	0.271054
ENSG00000185818	306.607	-0.454301	0.173961	-2.61151	0.00901435	0.145362
ENSG00000114529	133.332	-0.454268	0.20784	-2.18566	0.0288408	0.2587
ENSG00000187231	448.318	-0.454241	0.157698	-2.88044	0.00397118	0.0908628
ENSG00000164576	171.963	-0.454111	0.195187	-2.32654	0.0199898	0.21544
ENSG00000075702	574.515	-0.454058	0.152735	-2.97284	0.00295061	0.075147
ENSG00000107242	51.5108	-0.454051	0.232054	-1.95666	0.0503879	0.336279
ENSG00000240225	208.845	-0.453533	0.185146	-2.4496	0.0143014	0.182841
ENSG00000144736	338.932	-0.453245	0.170349	-2.66068	0.00779829	0.134904
ENSG00000179218	7240.88	-0.453039	0.133434	-3.39522	0.000685747	0.0293408
ENSG00000177370	321.19	-0.452965	0.170032	-2.66399	0.00772192	0.134611
ENSG00000113648	984.463	-0.452861	0.146655	-3.08793	0.00201556	0.0606955
ENSG00000136527	2865.47	-0.452661	0.137386	-3.29482	0.000984849	0.0376236
ENSG00000114812	58.005	-0.451384	0.229752	-1.96465	0.0494542	0.333751
ENSG00000179021	366.18	-0.451374	0.178391	-2.53025	0.0113982	0.164576
ENSG00000131398	42.643	-0.451027	0.232879	-1.93675	0.0527765	0.343023
ENSG00000165501	241.665	-0.450896	0.189616	-2.37794	0.0174098	0.201949
ENSG00000180626	112.033	-0.450873	0.211354	-2.13326	0.0329033	0.274933
ENSG00000143942	111.619	-0.450315	0.228726	-1.9688	0.0489763	0.331942
ENSG00000104299	244.5	-0.450061	0.189822	-2.37096	0.0177418	0.204062
ENSG00000173193	281.972	-0.449982	0.171505	-2.62372	0.00869742	0.143128
ENSG00000081692	36.6663	-0.449925	0.23268	-1.93367	0.0531541	0.344068
ENSG00000003096	215.62	-0.449274	0.183379	-2.44998	0.0142864	0.182832
ENSG00000198105	109.491	-0.448846	0.211	-2.12723	0.0334006	0.276269
ENSG00000137486	67.2818	-0.448821	0.229494	-1.9557	0.0505011	0.336279
ENSG00000169604	810.162	-0.448595	0.141244	-3.17602	0.00149312	0.0507029
ENSG00000123609	35.8392	-0.448241	0.231556	-1.93578	0.0528953	0.343354
ENSG00000176248	192.701	-0.447804	0.196096	-2.2836	0.0223953	0.228874
ENSG00000183171	62.0445	-0.445264	0.230951	-1.92796	0.0538603	0.346396
ENSG00000114491	557.413	-0.445032	0.161941	-2.74811	0.00599399	0.116925
ENSG00000100664	2885.25	-0.444552	0.231528	-1.92008	0.0548479	0.349715
ENSG00000162086	126.282	-0.444022	0.206992	-2.14512	0.0319433	0.27118
ENSG00000165675	135.263	-0.443936	0.209389	-2.12015	0.0339936	0.279348
ENSG00000185813	271.9	-0.443534	0.190179	-2.33219	0.0196907	0.214558
ENSG00000164344	144.513	-0.443204	0.203768	-2.17504	0.029627	0.26101
ENSG00000137814	336.102	-0.442855	0.171766	-2.57824	0.00993052	0.150898
ENSG00000171320	289.123	-0.442723	0.190558	-2.32329	0.0201634	0.216947
ENSG00000089091	89.6505	-0.44241	0.21828	-2.0268	0.0426828	0.307796
ENSG00000077616	55.9953	-0.442376	0.231136	-1.91393	0.0556296	0.351779
ENSG00000177082	160.359	-0.442296	0.201204	-2.19825	0.0279313	0.254906
ENSG00000225648	92.7255	-0.441984	0.218173	-2.02584	0.0427816	0.307816
ENSG00000101311	219.808	-0.441975	0.18389	-2.40347	0.0162404	0.196292
ENSG00000143502	41.5977	-0.441437	0.232931	-1.89514	0.0580738	0.359553
ENSG00000129295	21.8332	-0.441317	0.222148	-1.98659	0.0469676	NA
ENSG00000100591	1347.09	-0.441132	0.133628	-3.30118	0.000962791	0.0371123
ENSG00000187189	373.171	-0.440474	0.181666	-2.42463	0.0153238	0.189862
ENSG00000185515	312.5	-0.440254	0.183421	-2.40024	0.0163842	0.197101
ENSG00000171824	790.627	-0.439926	0.158226	-2.78036	0.00542987	0.109965
ENSG00000100023	326.035	-0.439904	0.168313	-2.6136	0.00895929	0.14536
ENSG00000007376	209.577	-0.439673	0.188808	-2.32868	0.0198759	0.215297
ENSG00000184677	285.538	-0.439295	0.171874	-2.55591	0.0105911	0.156983
ENSG00000136122	183.034	-0.439243	0.192791	-2.27834	0.0227063	0.231132
ENSG00000175029	2308.37	-0.439165	0.129127	-3.40103	0.000671322	0.0289164
ENSG00000177352	255.624	-0.438279	0.185547	-2.36208	0.0181725	0.207209
ENSG00000066382	49.4793	-0.438144	0.231826	-1.88997	0.0587624	0.360036
ENSG00000211445	305.648	-0.437921	0.175326	-2.49775	0.0124986	0.170109
ENSG00000133313	2204.64	-0.437751	0.13548	-3.23111	0.0012331	0.0443362
ENSG00000174327	34.5684	-0.437748	0.230482	-1.89927	0.0575286	0.357597
ENSG00000156256	263.861	-0.437395	0.183967	-2.37757	0.017427	0.201949
ENSG00000124459	194.161	-0.437356	0.195996	-2.23145	0.0256511	0.245898
ENSG00000163618	93.0631	-0.437247	0.218243	-2.00349	0.0451251	0.31721
ENSG00000117461	304.776	-0.437021	0.174292	-2.5074	0.0121622	0.168383
ENSG00000106462	485.675	-0.437014	0.179638	-2.43275	0.0149846	0.188018
ENSG00000171033	286.07	-0.436723	0.17605	-2.48068	0.0131132	0.175238
ENSG00000080824	23598.7	-0.436061	0.126738	-3.44066	0.000580298	0.0265079
ENSG00000172201	73.3921	-0.435767	0.224942	-1.93724	0.052716	0.343023
ENSG00000164172	167.064	-0.435651	0.198387	-2.19596	0.0280947	0.255557
ENSG00000105976	245.221	-0.435513	0.176613	-2.46592	0.0136662	0.179254
ENSG00000152457	58.2074	-0.434831	0.23093	-1.88296	0.0597061	0.362701
ENSG00000114988	252.269	-0.43464	0.176285	-2.46556	0.01368	0.179254
ENSG00000112079	310.419	-0.43436	0.175215	-2.47901	0.0131746	0.175642
ENSG00000167112	446.467	-0.434268	0.161539	-2.68831	0.0071814	0.129635
ENSG00000145982	125.638	-0.434213	0.211303	-2.05493	0.0398862	0.298182
ENSG00000076650	124.411	-0.434194	0.211582	-2.05213	0.0401571	0.299162
ENSG00000117280	192.984	-0.433435	0.188388	-2.30075	0.0214055	0.223096
ENSG00000151576	646.768	-0.432546	0.15616	-2.7699	0.00560736	0.112287
ENSG00000164961	734.376	-0.432419	0.146362	-2.95444	0.00313234	0.0781244
ENSG00000173085	217.528	-0.432149	0.183838	-2.35071	0.0187376	0.20948
ENSG00000229544	35.4386	-0.432138	0.23238	-1.85962	0.0629395	0.371012
ENSG00000102096	1687.48	-0.432057	0.123795	-3.49011	0.000482829	0.0237456
ENSG00000170681	73.7858	-0.431941	0.225796	-1.91297	0.0557517	0.351779
ENSG00000105676	732.092	-0.431906	0.155434	-2.7787	0.00545764	0.110322
ENSG00000118762	575.676	-0.431276	0.162491	-2.65416	0.00795071	0.135893
ENSG00000165730	36.6347	-0.431216	0.232632	-1.85364	0.0637904	0.372638
ENSG00000115993	254.056	-0.431129	0.197355	-2.18454	0.0289225	0.259072
ENSG00000118894	144.617	-0.431092	0.201714	-2.13715	0.0325859	0.273757
ENSG00000104142	410.368	-0.431086	0.169121	-2.54899	0.0108036	0.158667
ENSG00000171307	427.081	-0.43028	0.166239	-2.58833	0.00964431	0.150236
ENSG00000198805	548.684	-0.43011	0.159674	-2.69368	0.00706685	0.128485
ENSG00000119328	133.715	-0.429831	0.205552	-2.09111	0.0365182	0.285452
ENSG00000179051	6582.16	-0.429808	0.11185	-3.84273	0.000121675	0.00850261
ENSG00000139163	779.581	-0.429743	0.139324	-3.08449	0.002039	0.0610084
ENSG00000196517	236.965	-0.429595	0.19619	-2.18968	0.0285471	0.258177
ENSG00000100101	145.977	-0.429274	0.204555	-2.09858	0.0358543	0.283804
ENSG00000134851	646.652	-0.428873	0.164316	-2.61005	0.00905278	0.145542
ENSG00000062370	33.3871	-0.428596	0.230692	-1.85788	0.0631866	0.371536
ENSG00000116120	953.783	-0.428189	0.1627	-2.63177	0.00849421	0.141233
ENSG00000147596	545.606	-0.428069	0.151818	-2.81961	0.00480819	0.101873
ENSG00000135905	9.47123	-0.427741	0.181934	-2.35108	0.0187192	NA
ENSG00000100297	2713.84	-0.42772	0.12979	-3.29546	0.000982599	0.0376236
ENSG00000162734	960.631	-0.427549	0.145291	-2.94271	0.00325357	0.0793137
ENSG00000185220	54.5887	-0.427502	0.23058	-1.85403	0.0637355	0.372638
ENSG00000224411	916.387	-0.427479	0.150424	-2.84184	0.00448545	0.0981013
ENSG00000076003	2505.62	-0.426848	0.139306	-3.0641	0.00218325	0.0629713
ENSG00000253636	34.7081	-0.426824	0.232314	-1.83727	0.0661695	0.377994
ENSG00000108296	140.565	-0.426707	0.202092	-2.11145	0.0347336	0.281821
ENSG00000163482	254.952	-0.426676	0.192494	-2.21657	0.0266527	0.251554
ENSG00000176410	46.7924	-0.426594	0.232365	-1.83588	0.0663756	0.378666
ENSG00000196693	295.14	-0.426338	0.171527	-2.48554	0.0129356	0.173865
ENSG00000134262	65.0015	-0.426295	0.228935	-1.86208	0.0625921	0.370087
ENSG00000124875	55.7964	-0.42629	0.230508	-1.84935	0.0644068	0.374084
ENSG00000150756	66.8888	-0.42577	0.22976	-1.8531	0.0638674	0.372638
ENSG00000035141	1181.19	-0.425748	0.15036	-2.83152	0.00463273	0.0999401
ENSG00000178538	39.8366	-0.425526	0.232866	-1.82734	0.0676485	0.382995
ENSG00000143633	89.9706	-0.423392	0.219532	-1.92862	0.0537786	0.346396
ENSG00000117597	267.404	-0.423166	0.190429	-2.22218	0.0262713	0.250033
ENSG00000113643	1198.04	-0.423103	0.147697	-2.86466	0.00417452	0.0940071
ENSG00000188859	18.2257	-0.42261	0.217166	-1.94602	0.0516519	NA
ENSG00000198176	1189.3	-0.421428	0.160395	-2.62744	0.00860309	0.142306
ENSG00000111206	1343.85	-0.420857	0.135683	-3.10178	0.00192362	0.0593547
ENSG00000133169	440.335	-0.420789	0.163385	-2.57544	0.0100111	0.151127
ENSG00000072756	365.647	-0.420612	0.161202	-2.60922	0.00907482	0.145542
ENSG00000023572	35.8423	-0.420067	0.232207	-1.80902	0.0704481	0.387209
ENSG00000157470	10.4013	-0.419881	0.189124	-2.22014	0.0264093	NA
ENSG00000110107	1759.25	-0.4197	0.142024	-2.95513	0.00312541	0.0781244
ENSG00000084676	302.244	-0.41962	0.169836	-2.47073	0.0134838	0.177698
ENSG00000196659	53.1182	-0.419535	0.232327	-1.80579	0.0709507	0.388368
ENSG00000118412	451.973	-0.419281	0.161311	-2.59921	0.00934383	0.147946
ENSG00000145354	302.093	-0.419077	0.190076	-2.20478	0.0274692	0.252938
ENSG00000133943	223.076	-0.418944	0.185025	-2.26425	0.0235586	0.235275
ENSG00000181274	650.553	-0.41817	0.143323	-2.91767	0.00352655	0.0844529
ENSG00000187123	205.411	-0.417949	0.188159	-2.22126	0.0263334	0.250033
ENSG00000206538	203.928	-0.4179	0.191142	-2.18633	0.0287911	0.258671
ENSG00000092853	347.881	-0.417802	0.166306	-2.51225	0.0119963	0.167375
ENSG00000166669	180.447	-0.417329	0.195529	-2.13436	0.0328136	0.274752
ENSG00000164002	34.57	-0.417126	0.231859	-1.79905	0.072011	0.391501
ENSG00000241015	95.0752	-0.416799	0.223286	-1.86666	0.0619491	0.368757
ENSG00000143819	495.096	-0.416393	0.152889	-2.7235	0.00645938	0.121395
ENSG00000139174	141.544	-0.416057	0.201611	-2.06366	0.0390501	0.294187
ENSG00000101463	37.2915	-0.415872	0.232807	-1.78634	0.0740443	0.397288
ENSG00000160190	294.708	-0.415869	0.173973	-2.39043	0.0168289	0.199024
ENSG00000267640	24.1038	-0.415761	0.226006	-1.83961	0.0658262	NA
ENSG00000169418	159.936	-0.415229	0.199835	-2.07786	0.037722	0.289493
ENSG00000119927	357.418	-0.414911	0.162748	-2.54941	0.0107905	0.158667
ENSG00000004864	1220.83	-0.414648	0.133855	-3.09773	0.00195006	0.0598652
ENSG00000196267	62.1276	-0.41461	0.229116	-1.80961	0.0703569	0.387209
ENSG00000125968	360.857	-0.414602	0.180213	-2.30063	0.0214128	0.223096
ENSG00000163704	80.9916	-0.413985	0.221584	-1.8683	0.0617205	0.368225
ENSG00000124635	22.5279	-0.413966	0.222361	-1.86168	0.0626481	NA
ENSG00000215102	52.8802	-0.413946	0.231842	-1.78547	0.0741852	0.397288
ENSG00000104691	62.1431	-0.413725	0.231224	-1.78928	0.0735702	0.396227
ENSG00000161526	563.084	-0.413481	0.146185	-2.82847	0.00467708	0.100225
ENSG00000184524	38.9905	-0.41348	0.232348	-1.77957	0.075146	0.398914
ENSG00000185480	369.131	-0.413324	0.182967	-2.25901	0.0238826	0.237641
ENSG00000128656	430.663	-0.413215	0.174226	-2.37171	0.0177058	0.203831
ENSG00000124614	95.7022	-0.412757	0.21969	-1.87881	0.06027	0.364402
ENSG00000161547	2265.19	-0.412186	0.23224	-1.77483	0.0759268	0.401339
ENSG00000064651	213.363	-0.412088	0.190224	-2.16633	0.030286	0.262847
ENSG00000134363	171.947	-0.411694	0.196754	-2.09243	0.0363999	0.285236
ENSG00000228217	23.7301	-0.411575	0.220664	-1.86516	0.0621584	NA
ENSG00000145681	12.0447	-0.411396	0.197594	-2.08203	0.0373402	NA
ENSG00000177842	151.999	-0.4112	0.199675	-2.05934	0.0394615	0.296735
ENSG00000145623	55.38	-0.411124	0.231623	-1.77497	0.0759026	0.401339
ENSG00000136937	1305.97	-0.411041	0.139416	-2.94831	0.00319519	0.0787207
ENSG00000080503	96.4296	-0.41075	0.216438	-1.89777	0.057726	0.358303
ENSG00000177646	270.059	-0.410205	0.173557	-2.36351	0.0181026	0.20673
ENSG00000215251	394.13	-0.409409	0.159882	-2.5607	0.0104461	0.155733
ENSG00000178187	25.2057	-0.409255	0.226883	-1.80382	0.0712599	0.389562
ENSG00000117395	788.013	-0.409087	0.15848	-2.58132	0.00984235	0.150836
ENSG00000104205	25.8205	-0.409022	0.227641	-1.79679	0.0723694	0.392618
ENSG00000170962	81.9484	-0.408839	0.221931	-1.84219	0.0654473	0.376722
ENSG00000198768	39.622	-0.408794	0.23289	-1.75531	0.0792064	0.408475
ENSG00000169184	153.749	-0.408385	0.20192	-2.02251	0.0431241	0.309241
ENSG00000141655	99.3752	-0.407948	0.227264	-1.79504	0.0726475	0.393627
ENSG00000180440	14.6132	-0.407675	0.204516	-1.99336	0.0462221	NA
ENSG00000138231	215.439	-0.407289	0.186519	-2.18363	0.0289892	0.25941
ENSG00000162929	154.768	-0.407241	0.209353	-1.94524	0.0517462	0.340452
ENSG00000110429	323.413	-0.407127	0.179045	-2.27388	0.0229734	0.232194
ENSG00000121931	211.433	-0.407107	0.18395	-2.21315	0.0268876	0.252106
ENSG00000129347	407.243	-0.407102	0.175591	-2.31846	0.0204244	0.218473
ENSG00000120458	110.593	-0.407044	0.220488	-1.8461	0.0648776	0.37529
ENSG00000064989	32.1102	-0.406851	0.230277	-1.76679	0.0772633	0.404402
ENSG00000146409	398.568	-0.406531	0.16152	-2.51691	0.0118391	0.166615
ENSG00000163710	118.966	-0.405827	0.208626	-1.94523	0.0517467	0.340452
ENSG00000232677	905.387	-0.405728	0.147217	-2.75598	0.00585166	0.115553
ENSG00000063244	2331.15	-0.405617	0.139267	-2.91252	0.00358523	0.0856984
ENSG00000162227	130.634	-0.405284	0.210735	-1.9232	0.0544555	0.348624
ENSG00000069702	53.092	-0.405113	0.230968	-1.75398	0.0794342	0.40887
ENSG00000138670	17.1519	-0.405055	0.211703	-1.91331	0.055708	NA
ENSG00000136104	279.879	-0.404341	0.182898	-2.21075	0.0270533	0.252429
ENSG00000116544	99.0944	-0.4039	0.21446	-1.88333	0.059655	0.362701
ENSG00000103042	353.706	-0.403763	0.169272	-2.38529	0.0170654	0.20031
ENSG00000213949	105.576	-0.403687	0.215209	-1.87579	0.0606847	0.365749
ENSG00000108264	175.432	-0.403663	0.195277	-2.06713	0.0387224	0.292721
ENSG00000153037	148.445	-0.403644	0.200674	-2.01144	0.0442788	0.314233
ENSG00000012048	516.917	-0.403633	0.16123	-2.50345	0.0122988	0.168748
ENSG00000213694	91.1997	-0.403572	0.217454	-1.8559	0.0634678	0.371827
ENSG00000138134	54.2812	-0.4035	0.230631	-1.74955	0.0801966	0.410479
ENSG00000169621	62.5545	-0.403492	0.22805	-1.76931	0.0768414	0.403736
ENSG00000172020	155.032	-0.403306	0.196344	-2.05408	0.039968	0.29862
ENSG00000182645	18.5633	-0.40327	0.216614	-1.8617	0.0626451	NA
ENSG00000105926	715.533	-0.403065	0.155474	-2.5925	0.00952819	0.149516
ENSG00000254093	168.096	-0.403034	0.201774	-1.99745	0.045776	0.319495
ENSG00000112312	824.002	-0.402877	0.153682	-2.6215	0.00875438	0.143791
ENSG00000111802	704.225	-0.402714	0.154848	-2.60071	0.00930302	0.147756
ENSG00000261762	20.6758	-0.402627	0.218142	-1.84571	0.0649345	NA
ENSG00000072274	1937.48	-0.402586	0.160197	-2.51307	0.0119687	0.167261
ENSG00000176273	115.747	-0.401759	0.210097	-1.91226	0.0558433	0.351893
ENSG00000105953	1369	-0.401438	0.127288	-3.15377	0.00161176	0.0529117
ENSG00000204611	432.339	-0.400989	0.162445	-2.46846	0.0135694	0.17846
ENSG00000174607	451.52	-0.400723	0.155133	-2.5831	0.00979178	0.150836
ENSG00000138162	446.912	-0.399932	0.169755	-2.35595	0.0184756	0.208578
ENSG00000272711	53.4401	-0.399774	0.232325	-1.72075	0.0852963	0.421263
ENSG00000145604	1131.94	-0.399592	0.157958	-2.52974	0.0114146	0.164593
ENSG00000060762	62.8939	-0.399423	0.230264	-1.73463	0.0828056	0.417067
ENSG00000163939	969.512	-0.399117	0.149407	-2.67134	0.00755492	0.133898
ENSG00000055732	21.939	-0.399103	0.22355	-1.78529	0.0742135	NA
ENSG00000168661	70.701	-0.399087	0.225233	-1.77189	0.0764136	0.402977
ENSG00000133740	420.066	-0.398704	0.175906	-2.26657	0.0234164	0.234274
ENSG00000178409	613.53	-0.398689	0.144731	-2.75469	0.00587486	0.115553
ENSG00000156966	656.489	-0.398647	0.163773	-2.43415	0.0149267	0.187867
ENSG00000162065	104.844	-0.398002	0.219446	-1.81366	0.0697296	0.386866
ENSG00000139687	369.089	-0.397904	0.170456	-2.33435	0.0195773	0.213831
ENSG00000106443	719.423	-0.397901	0.148698	-2.67589	0.007453	0.13287
ENSG00000132394	148.751	-0.39784	0.199247	-1.99672	0.0458561	0.319495
ENSG00000101773	589.324	-0.397822	0.161768	-2.45921	0.0139244	0.18055
ENSG00000157181	200.504	-0.397703	0.193164	-2.05889	0.0395043	0.296884
ENSG00000070413	1007.9	-0.397505	0.148114	-2.68378	0.00727952	0.130868
ENSG00000153187	7867.29	-0.396854	0.123594	-3.21096	0.00132294	0.0463968
ENSG00000118418	1005.02	-0.396697	0.137105	-2.89339	0.00381112	0.088462
ENSG00000206527	734.805	-0.396557	0.153688	-2.58028	0.00987205	0.150898
ENSG00000141279	1060.64	-0.396221	0.143747	-2.75637	0.00584467	0.115553
ENSG00000155100	434.098	-0.396099	0.164384	-2.4096	0.0159702	0.193939
ENSG00000105011	383.176	-0.396034	0.170031	-2.3292	0.0198487	0.215192
ENSG00000033050	914.879	-0.395975	0.153903	-2.57289	0.0100852	0.151418
ENSG00000234241	144.114	-0.39594	0.204438	-1.93672	0.052779	0.343023
ENSG00000104522	435.497	-0.395483	0.172025	-2.29898	0.0215059	0.223703
ENSG00000067840	1304.43	-0.395422	0.133326	-2.96583	0.00301868	0.0761252
ENSG00000128708	890.938	-0.395416	0.151983	-2.60171	0.00927598	0.147756
ENSG00000053900	351.579	-0.395089	0.170239	-2.32079	0.020298	0.217847
ENSG00000070961	651.996	-0.395057	0.152424	-2.59183	0.0095466	0.149533
ENSG00000139364	1326.23	-0.394753	0.128536	-3.07116	0.00213231	0.0626244
ENSG00000228589	177.816	-0.394628	0.197919	-1.99388	0.0461647	0.320829
ENSG00000138246	704.504	-0.394335	0.142324	-2.77069	0.00559373	0.112189
ENSG00000232702	46.8793	-0.39432	0.232941	-1.69279	0.0904957	0.430367
ENSG00000203666	89.2603	-0.393931	0.22192	-1.7751	0.0758815	0.401339
ENSG00000172115	2464.73	-0.39324	0.141249	-2.78402	0.00536903	0.10953
ENSG00000060339	1300.88	-0.39298	0.160017	-2.45587	0.0140546	0.181178
ENSG00000176087	858.04	-0.392752	0.140999	-2.7855	0.00534453	0.10953
ENSG00000168297	80.9022	-0.392572	0.224196	-1.75102	0.0799421	0.410185
ENSG00000183864	848.285	-0.392558	0.135136	-2.90491	0.00367363	0.0871621
ENSG00000048162	313.148	-0.392527	0.185454	-2.11657	0.0342963	0.279924
ENSG00000143368	1206.54	-0.392357	0.142386	-2.7556	0.00585854	0.115553
ENSG00000167384	86.3567	-0.392262	0.222143	-1.76581	0.0774283	0.404656
ENSG00000133958	38.0301	-0.392238	0.232184	-1.68934	0.0911541	0.430678
ENSG00000174442	1073.01	-0.391791	0.156791	-2.49881	0.0124611	0.170109
ENSG00000177192	363.742	-0.391558	0.170999	-2.28984	0.0220308	0.226775
ENSG00000241127	165.498	-0.391419	0.21867	-1.78999	0.0734549	0.39583
ENSG00000132388	1831.11	-0.391323	0.120647	-3.24353	0.00118057	0.0436709
ENSG00000196663	285.953	-0.391306	0.173126	-2.26024	0.0238062	0.237433
ENSG00000153914	555.534	-0.391221	0.158519	-2.46797	0.0135882	0.178524
ENSG00000033100	210.957	-0.391139	0.19235	-2.03348	0.0420044	0.305273
ENSG00000178381	67.0167	-0.390918	0.228159	-1.71336	0.0866463	0.424501
ENSG00000184831	185.386	-0.390579	0.192429	-2.02972	0.0423845	0.306506
ENSG00000148082	27.067	-0.390556	0.228772	-1.70718	0.0877877	0.42624
ENSG00000100461	476.332	-0.39055	0.162809	-2.39882	0.0164479	0.197487
ENSG00000112739	1147.32	-0.390389	0.146635	-2.66232	0.00776036	0.134611
ENSG00000177855	319.651	-0.38993	0.178297	-2.18697	0.0287445	0.258671
ENSG00000198168	137.709	-0.389836	0.207322	-1.88034	0.0600614	0.363655
ENSG00000108654	4747.02	-0.389736	0.147961	-2.63404	0.00843745	0.141029
ENSG00000090316	752.196	-0.389627	0.148862	-2.61736	0.00886117	0.144526
ENSG00000183605	171.436	-0.389396	0.202637	-1.92165	0.0546504	0.349175
ENSG00000129493	225.867	-0.389331	0.185611	-2.09756	0.0359437	0.283804
ENSG00000243004	31.7854	-0.389257	0.223349	-1.74282	0.0813651	0.413625
ENSG00000116161	1200.9	-0.38909	0.147664	-2.63498	0.00841422	0.141029
ENSG00000119888	1871.19	-0.389061	0.126218	-3.08245	0.00205302	0.0612849
ENSG00000187240	222.711	-0.388947	0.180766	-2.15167	0.0314236	0.268154
ENSG00000273290	215.585	-0.388827	0.198183	-1.96196	0.0497676	0.334985
ENSG00000135899	72.0742	-0.388488	0.225481	-1.72293	0.0849008	0.420767
ENSG00000255725	49.0514	-0.388263	0.23233	-1.67117	0.0946875	0.437758
ENSG00000153246	20.1985	-0.388104	0.219201	-1.77054	0.0766365	NA
ENSG00000183908	31.7737	-0.38792	0.227478	-1.70531	0.0881375	0.42624
ENSG00000112685	891.948	-0.387813	0.137372	-2.82309	0.00475638	0.101586
ENSG00000105983	707.76	-0.3878	0.150606	-2.57493	0.010026	0.151127
ENSG00000108064	1330.53	-0.387745	0.141874	-2.73303	0.00627543	0.119868
ENSG00000248966	20.7372	-0.387606	0.21948	-1.76602	0.077392	NA
ENSG00000243709	15.107	-0.387457	0.205216	-1.88804	0.0590199	NA
ENSG00000103540	225.467	-0.387298	0.183662	-2.10876	0.0349656	0.282453
ENSG00000132846	112.617	-0.387108	0.212662	-1.8203	0.0687137	0.384795
ENSG00000131203	852.841	-0.387075	0.152102	-2.54483	0.0109331	0.159837
ENSG00000135917	77.3035	-0.387019	0.223341	-1.73286	0.0831203	0.417749
ENSG00000165025	60.907	-0.386575	0.230458	-1.67742	0.0934599	0.436031
ENSG00000148688	501.865	-0.386573	0.164209	-2.35415	0.0185653	0.208756
ENSG00000183853	594.831	-0.386516	0.150202	-2.5733	0.0100732	0.151418
ENSG00000074219	1556.28	-0.386443	0.149873	-2.57846	0.00992405	0.150898
ENSG00000137266	272.616	-0.386407	0.173427	-2.22806	0.0258765	0.247505
ENSG00000141030	1037.45	-0.386257	0.158631	-2.43494	0.0148942	0.187867
ENSG00000070614	1101.89	-0.3861	0.135917	-2.8407	0.00450153	0.0981013
ENSG00000072849	247.625	-0.386093	0.185857	-2.07737	0.0377675	0.289596
ENSG00000198954	469.557	-0.386092	0.151449	-2.54931	0.0107935	0.158667
ENSG00000166206	2060.59	-0.385281	0.131426	-2.93154	0.00337289	0.0815339
ENSG00000101019	466.014	-0.384928	0.154124	-2.49751	0.0125067	0.170109
ENSG00000180855	60.678	-0.384784	0.22922	-1.67866	0.0932178	0.435643
ENSG00000095209	202.89	-0.384735	0.192192	-2.00183	0.045303	0.317853
ENSG00000128609	602.939	-0.384281	0.151305	-2.53977	0.0110926	0.161617
ENSG00000115685	473.503	-0.384113	0.161378	-2.38021	0.0173027	0.201484
ENSG00000166847	870.187	-0.383929	0.141565	-2.71204	0.0066871	0.124033
ENSG00000067248	649.699	-0.383927	0.167293	-2.29493	0.0217369	0.225168
ENSG00000160606	158.636	-0.383813	0.202341	-1.89686	0.0578467	0.358369
ENSG00000197457	596.316	-0.383696	0.153224	-2.50416	0.0122742	0.168748
ENSG00000120833	207.299	-0.383679	0.200392	-1.91465	0.0555375	0.351692
ENSG00000177807	17.6568	-0.383395	0.21394	-1.79207	0.0731222	NA
ENSG00000105939	761.728	-0.383376	0.137221	-2.79385	0.00520841	0.108355
ENSG00000152253	280.357	-0.38316	0.182019	-2.10506	0.0352865	0.283728
ENSG00000100395	345.3	-0.383004	0.164722	-2.32516	0.0200634	0.216052
ENSG00000134802	95.4952	-0.382417	0.217814	-1.7557	0.0791397	0.408475
ENSG00000117308	150.092	-0.382364	0.201043	-1.90191	0.0571831	0.356312
ENSG00000077279	79.1614	-0.381644	0.224559	-1.69953	0.08922	0.428612
ENSG00000115514	228.38	-0.381177	0.190352	-2.00249	0.0452325	0.317617
ENSG00000162194	357.678	-0.381069	0.179313	-2.12516	0.0335737	0.277347
ENSG00000257151	780.185	-0.380904	0.153656	-2.47894	0.0131773	0.175642
ENSG00000140365	500.69	-0.380426	0.154728	-2.45867	0.0139451	0.18055
ENSG00000121871	60.3563	-0.380407	0.230777	-1.64838	0.099275	0.446818
ENSG00000139719	309.267	-0.380364	0.185837	-2.04676	0.040682	0.300756
ENSG00000006634	489.367	-0.37969	0.160861	-2.36036	0.0182572	0.207322
ENSG00000125744	129.604	-0.379668	0.204929	-1.85268	0.063928	0.372821
ENSG00000110075	1989.8	-0.37954	0.13824	-2.74552	0.00604144	0.116925
ENSG00000172766	386.162	-0.379487	0.16873	-2.24908	0.0245076	0.241817
ENSG00000144824	398.072	-0.379317	0.17374	-2.18325	0.0290176	0.25941
ENSG00000172936	292.123	-0.379107	0.17736	-2.1375	0.0325571	0.273757
ENSG00000160310	462.591	-0.379106	0.163842	-2.31386	0.0206756	0.219152
ENSG00000173436	105.857	-0.378099	0.213499	-1.77097	0.0765664	0.403596
ENSG00000110583	394.03	-0.378089	0.16934	-2.23272	0.0255673	0.245755
ENSG00000164548	1020.79	-0.377849	0.144592	-2.61321	0.00896967	0.14536
ENSG00000113368	2435.13	-0.377211	0.130764	-2.88468	0.00391815	0.0901315
ENSG00000104177	758.01	-0.377016	0.138732	-2.71759	0.00657597	0.122866
ENSG00000106635	255.026	-0.376925	0.182367	-2.06685	0.0387481	0.292743
ENSG00000100823	3539.41	-0.376895	0.141357	-2.66626	0.00766993	0.134611
ENSG00000171793	1465.11	-0.376748	0.149307	-2.52331	0.0116257	0.166333
ENSG00000137547	589.792	-0.376737	0.149551	-2.51911	0.0117651	0.166333
ENSG00000147526	227.51	-0.376715	0.186691	-2.01786	0.0436063	0.312001
ENSG00000261373	64.5462	-0.376487	0.228166	-1.65006	0.098931	0.446198
ENSG00000107758	565.215	-0.376464	0.153094	-2.45903	0.0139312	0.18055
ENSG00000138399	506.54	-0.376305	0.172979	-2.17543	0.0295976	0.260931
ENSG00000077809	876.553	-0.375887	0.140185	-2.68136	0.00733235	0.131195
ENSG00000145692	16.0365	-0.375596	0.211976	-1.77188	0.0764141	NA
ENSG00000125257	248.363	-0.375328	0.181272	-2.07053	0.0384031	0.292222
ENSG00000198952	1749.67	-0.375113	0.13028	-2.87928	0.00398585	0.0910364
ENSG00000166471	458.848	-0.375003	0.167491	-2.23894	0.0251599	0.24537
ENSG00000141642	36.4279	-0.374872	0.232529	-1.61215	0.106929	0.459506
ENSG00000102003	77.5453	-0.374806	0.226684	-1.65343	0.0982441	0.444819
ENSG00000163328	16.1253	-0.374798	0.211472	-1.77233	0.0763394	NA
ENSG00000105894	333.508	-0.37469	0.181227	-2.06752	0.0386852	0.292694
ENSG00000117500	469.24	-0.374638	0.160701	-2.33128	0.0197387	0.214692
ENSG00000122958	666.569	-0.374337	0.156384	-2.39371	0.0166791	0.198852
ENSG00000103249	322.718	-0.374008	0.166401	-2.24762	0.0246001	0.242153
ENSG00000084070	75.9492	-0.373813	0.22588	-1.65492	0.0979413	0.443917
ENSG00000004478	3135.8	-0.373663	0.120312	-3.10579	0.00189771	0.0589361
ENSG00000112787	334.332	-0.373618	0.164704	-2.26843	0.0233032	0.233638
ENSG00000075213	516.977	-0.373336	0.164335	-2.2718	0.0230983	0.232543
ENSG00000116237	2145.63	-0.373334	0.134611	-2.77344	0.00554671	0.11177
ENSG00000172318	316.752	-0.373209	0.182756	-2.04211	0.0411405	0.301441
ENSG00000088986	2117.59	-0.373013	0.127825	-2.91816	0.00352099	0.0844529
ENSG00000133119	788.207	-0.372964	0.142858	-2.61073	0.00903492	0.145511
ENSG00000163666	94.0081	-0.372692	0.225847	-1.6502	0.0989023	0.446198
ENSG00000197299	666.651	-0.372626	0.15368	-2.42468	0.0153218	0.189862
ENSG00000180035	476.43	-0.372504	0.159143	-2.34069	0.0192482	0.211684
ENSG00000213853	197.851	-0.372283	0.1954	-1.90523	0.0567498	0.3543
ENSG00000171130	146.212	-0.372144	0.199092	-1.86921	0.0615937	0.368071
ENSG00000215114	501.881	-0.37212	0.166605	-2.23355	0.0255129	0.245755
ENSG00000172081	76.9315	-0.371404	0.223419	-1.66237	0.0964395	0.440533
ENSG00000064601	286.815	-0.371373	0.176851	-2.09992	0.0357355	0.283804
ENSG00000171649	576.669	-0.371361	0.155487	-2.38837	0.0169233	0.199474
ENSG00000135521	510.567	-0.371356	0.182355	-2.03645	0.0417057	0.303987
ENSG00000145685	803.288	-0.371298	0.139403	-2.66348	0.00773369	0.134611
ENSG00000214185	117.111	-0.371292	0.213539	-1.73876	0.0820778	0.415111
ENSG00000197977	19.6011	-0.371136	0.218693	-1.69707	0.0896842	NA
ENSG00000135763	587.753	-0.370889	0.146897	-2.52483	0.0115755	0.16583
ENSG00000110975	23.1277	-0.370859	0.224162	-1.65442	0.0980417	NA
ENSG00000112414	56.1223	-0.370711	0.230228	-1.61019	0.107356	0.460778
ENSG00000155329	277.644	-0.370709	0.183788	-2.01704	0.0436911	0.312434
ENSG00000082397	178.676	-0.370708	0.193772	-1.91312	0.0557332	0.351779
ENSG00000174842	335.286	-0.370589	0.183927	-2.01488	0.0439177	0.313008
ENSG00000152782	470.286	-0.370505	0.157845	-2.34728	0.0189113	0.210241
ENSG00000115761	410.078	-0.370337	0.165915	-2.23208	0.0256094	0.245755
ENSG00000146576	185.172	-0.370245	0.189264	-1.95623	0.0504378	0.336279
ENSG00000139117	71.2402	-0.370218	0.224852	-1.6465	0.099661	0.446818
ENSG00000090273	1533.15	-0.370146	0.129912	-2.8492	0.00438287	0.0974343
ENSG00000004961	263.057	-0.370084	0.18162	-2.03768	0.041582	0.30361
ENSG00000180914	20.1433	-0.369633	0.215377	-1.71621	0.0861233	NA
ENSG00000101361	3052.22	-0.369379	0.14497	-2.54797	0.0108353	0.158951
ENSG00000124659	214.981	-0.368825	0.187048	-1.97182	0.0486303	0.330737
ENSG00000132932	184.24	-0.368738	0.194907	-1.89187	0.0585087	0.359553
ENSG00000103274	102.755	-0.36858	0.218787	-1.68465	0.0920559	0.43299
ENSG00000028839	474.357	-0.368314	0.173386	-2.12425	0.0336496	0.277347
ENSG00000152990	902.183	-0.368234	0.135042	-2.72681	0.00639507	0.120716
ENSG00000153012	147.434	-0.368161	0.203103	-1.81268	0.0698811	0.386866
ENSG00000174669	300.447	-0.367879	0.172169	-2.13674	0.0326192	0.273757
ENSG00000126953	177.935	-0.367276	0.192325	-1.90966	0.056177	0.35261
ENSG00000064225	90.0283	-0.366853	0.21819	-1.68135	0.0926958	0.434515
ENSG00000230590	22.3472	-0.366474	0.219698	-1.66808	0.0952993	NA
ENSG00000161267	165.066	-0.366466	0.198217	-1.84881	0.0644846	0.374197
ENSG00000093144	658.55	-0.366142	0.155458	-2.35525	0.0185104	0.208672
ENSG00000146476	911.235	-0.366137	0.158576	-2.3089	0.0209491	0.220774
ENSG00000264247	52.1207	-0.365993	0.23292	-1.57133	0.116107	0.472857
ENSG00000163006	270.8	-0.365898	0.178411	-2.05088	0.0402789	0.299722
ENSG00000186834	384.78	-0.365859	0.163163	-2.24228	0.0249431	0.244032
ENSG00000065154	1288.65	-0.365846	0.145138	-2.52068	0.011713	0.166333
ENSG00000143858	249.189	-0.365732	0.176845	-2.0681	0.0386309	0.292593
ENSG00000198739	7.72795	-0.365649	0.171207	-2.13572	0.0327025	NA
ENSG00000065328	656.624	-0.365592	0.146921	-2.48836	0.0128332	0.172927
ENSG00000186469	169.57	-0.365333	0.20203	-1.80831	0.070558	0.387209
ENSG00000157895	239.374	-0.365325	0.197955	-1.8455	0.0649649	0.375457
ENSG00000076248	2268.81	-0.364965	0.128455	-2.84118	0.00449468	0.0981013
ENSG00000151835	958.485	-0.364886	0.139605	-2.6137	0.0089567	0.14536
ENSG00000186871	509.128	-0.364661	0.157592	-2.31396	0.0206701	0.219152
ENSG00000140931	247.22	-0.364606	0.177555	-2.05348	0.0400261	0.29888
ENSG00000137760	171.672	-0.364474	0.208995	-1.74394	0.0811701	0.413288
ENSG00000110921	149.043	-0.364358	0.197859	-1.84151	0.0655471	0.376955
ENSG00000136110	1018.15	-0.36426	0.145029	-2.51163	0.0120175	0.167488
ENSG00000077254	1156.14	-0.364052	0.147766	-2.4637	0.0137511	0.179254
ENSG00000198900	2109.28	-0.364043	0.120959	-3.00964	0.0026156	0.0700916
ENSG00000161217	352.112	-0.363888	0.164361	-2.21396	0.0268315	0.252106
ENSG00000011376	868.58	-0.363691	0.142254	-2.55663	0.0105692	0.156839
ENSG00000226539	44.0428	-0.363649	0.232815	-1.56197	0.118295	0.477088
ENSG00000053372	699.399	-0.363466	0.158259	-2.29665	0.0216388	0.224721
ENSG00000179331	107.807	-0.363448	0.217651	-1.66987	0.0949453	0.437758
ENSG00000141084	269.838	-0.363448	0.179142	-2.02883	0.0424755	0.306818
ENSG00000102393	394.447	-0.362982	0.162593	-2.23245	0.0255849	0.245755
ENSG00000170522	1704.85	-0.362582	0.139238	-2.60403	0.00921337	0.147276
ENSG00000137714	150.574	-0.362537	0.2006	-1.80726	0.070722	0.387916
ENSG00000171456	314.787	-0.362358	0.180698	-2.00532	0.0449292	0.316526
ENSG00000111875	416.744	-0.362169	0.157418	-2.30069	0.021409	0.223096
ENSG00000198513	54.5035	-0.362035	0.230476	-1.57081	0.116226	0.472857
ENSG00000236673	52.0929	-0.362005	0.23294	-1.55407	0.120168	0.47946
ENSG00000116044	433.543	-0.361993	0.156104	-2.31893	0.0203988	0.218382
ENSG00000167912	48.6807	-0.36199	0.232886	-1.55437	0.120097	0.479341
ENSG00000040275	528.11	-0.361961	0.164102	-2.20571	0.0274041	0.2527
ENSG00000160633	1077.58	-0.36191	0.132644	-2.72844	0.00636347	0.12068
ENSG00000170364	188.515	-0.361648	0.196492	-1.84053	0.0656909	0.377133
ENSG00000197771	1460.16	-0.361455	0.131081	-2.7575	0.0058245	0.115553
ENSG00000235489	94.8269	-0.361278	0.219366	-1.64692	0.0995749	0.446818
ENSG00000007923	656.279	-0.361117	0.154224	-2.34151	0.0192059	0.211611
ENSG00000238084	36.3036	-0.361099	0.232597	-1.55247	0.12055	0.479654
ENSG00000162543	14.6234	-0.36079	0.2076	-1.73791	0.0822272	NA
ENSG00000010165	616.211	-0.360754	0.153897	-2.34413	0.0190714	0.211035
ENSG00000077063	446.371	-0.360644	0.157984	-2.28279	0.0224429	0.229178
ENSG00000065548	991.341	-0.360531	0.14681	-2.45577	0.0140583	0.181178
ENSG00000163932	245.341	-0.360441	0.189255	-1.90453	0.0568416	0.354528
ENSG00000151690	70.7201	-0.360234	0.228222	-1.57843	0.114466	0.470931
ENSG00000083067	93.9318	-0.359935	0.216994	-1.65873	0.0971701	0.441793
ENSG00000156140	70.9266	-0.359921	0.226821	-1.58681	0.112555	0.468786
ENSG00000136888	1032.4	-0.35989	0.152918	-2.35348	0.0185986	0.208756
ENSG00000105329	74.6135	-0.359834	0.226225	-1.5906	0.111699	0.468329
ENSG00000186272	50.0751	-0.359691	0.232601	-1.54638	0.122012	0.482045
ENSG00000133302	318.954	-0.359628	0.171375	-2.09848	0.0358627	0.283804
ENSG00000130816	2289.94	-0.35937	0.117871	-3.04884	0.00229724	0.0649503
ENSG00000132330	85.9596	-0.359193	0.219921	-1.63328	0.10241	0.452669
ENSG00000110723	37.9437	-0.358923	0.232381	-1.54455	0.122456	0.482183
ENSG00000148835	282.642	-0.358918	0.185239	-1.9376	0.0526723	0.343023
ENSG00000170854	102.089	-0.358887	0.220945	-1.62433	0.104306	0.456451
ENSG00000134444	407.732	-0.358625	0.170553	-2.10271	0.0354907	0.283804
ENSG00000007968	105.016	-0.358622	0.215896	-1.66109	0.0966958	0.440541
ENSG00000120802	2976.5	-0.35856	0.14085	-2.54568	0.0109065	0.159813
ENSG00000158773	472.387	-0.358526	0.170572	-2.10191	0.0355615	0.283804
ENSG00000172315	209.444	-0.358516	0.195342	-1.83533	0.0664572	0.378794
ENSG00000162493	1367.6	-0.358342	0.128501	-2.78864	0.00529299	0.109405
ENSG00000196338	288.654	-0.358207	0.170096	-2.10591	0.035212	0.283728
ENSG00000184304	91.538	-0.357532	0.220608	-1.62067	0.105089	0.456566
ENSG00000141452	117.975	-0.35715	0.20924	-1.70689	0.0878419	0.42624
ENSG00000064703	463.812	-0.356951	0.156008	-2.28803	0.0221361	0.227471
ENSG00000168301	191.063	-0.356848	0.187091	-1.90735	0.0564758	0.353291
ENSG00000124493	259.862	-0.356813	0.177296	-2.01253	0.0441645	0.314069
ENSG00000164045	1043.38	-0.35667	0.142821	-2.49733	0.0125132	0.170109
ENSG00000198677	825.096	-0.356573	0.142203	-2.5075	0.012159	0.168383
ENSG00000221955	124.55	-0.356423	0.208985	-1.70549	0.0881026	0.42624
ENSG00000188171	149.474	-0.356372	0.198154	-1.79846	0.0721049	0.391845
ENSG00000187676	79.0374	-0.356318	0.224574	-1.58664	0.112595	0.468786
ENSG00000104825	241.331	-0.356125	0.181385	-1.96337	0.0496036	0.334408
ENSG00000245680	77.8345	-0.356109	0.224999	-1.58271	0.113486	0.469604
ENSG00000165359	69.4651	-0.356035	0.225609	-1.57811	0.114541	0.470931
ENSG00000077232	1653.09	-0.355961	0.139517	-2.55137	0.0107299	0.158127
ENSG00000136891	1216.07	-0.35584	0.148813	-2.39118	0.0167941	0.199024
ENSG00000224773	61.6541	-0.355802	0.230638	-1.54269	0.122907	0.482983
ENSG00000136273	138.917	-0.355646	0.203168	-1.7505	0.0800323	0.410261
ENSG00000083307	427.945	-0.355537	0.16244	-2.18872	0.028617	0.258472
ENSG00000090520	775.711	-0.355375	0.144748	-2.45513	0.0140834	0.181319
ENSG00000149716	104.192	-0.355306	0.214826	-1.65393	0.0981425	0.444516
ENSG00000226673	10.2725	-0.35501	0.183461	-1.93508	0.0529811	NA
ENSG00000144136	1234.37	-0.354952	0.137024	-2.59043	0.00958552	0.149683
ENSG00000185565	68.9487	-0.35454	0.22581	-1.57008	0.116397	0.472857
ENSG00000140326	155.11	-0.354301	0.197318	-1.79558	0.0725607	0.393489
ENSG00000135090	97.2982	-0.35429	0.220882	-1.60398	0.108719	0.463471
ENSG00000171204	515.309	-0.354148	0.16868	-2.09953	0.0357703	0.283804
ENSG00000204178	168.89	-0.35358	0.198548	-1.78083	0.0749404	0.398593
ENSG00000144802	136.319	-0.353543	0.20859	-1.69492	0.0900906	0.429922
ENSG00000154655	11.5146	-0.353422	0.195869	-1.80438	0.0711712	NA
ENSG00000149483	159.197	-0.353414	0.195248	-1.81008	0.0702841	0.387209
ENSG00000145794	409.648	-0.353183	0.161568	-2.18598	0.0288174	0.258671
ENSG00000162769	968.265	-0.353148	0.140085	-2.52095	0.0117038	0.166333
ENSG00000185344	548.844	-0.352972	0.162629	-2.17041	0.0299755	0.262303
ENSG00000123104	505.126	-0.352889	0.158501	-2.22642	0.0259863	0.248091
ENSG00000136731	1474.8	-0.352621	0.124037	-2.84287	0.00447089	0.0981013
ENSG00000104381	406.087	-0.352506	0.169195	-2.08343	0.0372116	0.287431
ENSG00000164073	115.403	-0.352424	0.211036	-1.66998	0.0949241	0.437758
ENSG00000162344	137.859	-0.351977	0.207594	-1.6955	0.0899799	0.429922
ENSG00000147402	241.833	-0.351873	0.178313	-1.97334	0.0484569	0.330145
ENSG00000092094	192.288	-0.351747	0.189927	-1.85201	0.0640243	0.37313
ENSG00000182070	18.7848	-0.35174	0.215543	-1.63188	0.102704	NA
ENSG00000046889	638.2	-0.351536	0.142335	-2.46977	0.01352	0.177993
ENSG00000229186	14.9961	-0.351444	0.209	-1.68155	0.092656	NA
ENSG00000185418	143.647	-0.351299	0.203668	-1.72486	0.0845521	0.420064
ENSG00000132256	423.217	-0.350997	0.178876	-1.96224	0.0497344	0.334937
ENSG00000118496	758.442	-0.350852	0.144901	-2.42132	0.0154643	0.190682
ENSG00000149658	794.731	-0.350774	0.143466	-2.44499	0.0144855	0.184108
ENSG00000188559	392.564	-0.350559	0.159502	-2.19783	0.027961	0.254906
ENSG00000136816	207.14	-0.350184	0.191668	-1.82703	0.0676948	0.382995
ENSG00000175928	3365.13	-0.349997	0.128941	-2.7144	0.00663951	0.123693
ENSG00000184156	56.9897	-0.34993	0.229735	-1.52319	0.12771	0.490154
ENSG00000094804	1481.87	-0.349871	0.160572	-2.17891	0.0293385	0.260198
ENSG00000163884	186.913	-0.349818	0.19225	-1.8196	0.0688202	0.384913
ENSG00000013275	1249.43	-0.349739	0.148221	-2.35958	0.0182956	0.207458
ENSG00000163406	37.5487	-0.349329	0.232424	-1.50298	0.132844	0.499045
ENSG00000126107	416.123	-0.349241	0.157547	-2.21673	0.0266414	0.251554
ENSG00000085511	720.102	-0.349193	0.141842	-2.46185	0.0138223	0.17976
ENSG00000185917	164.858	-0.349161	0.209586	-1.66595	0.0957225	0.439512
ENSG00000166446	20.2283	-0.349045	0.220361	-1.58397	0.1132	NA
ENSG00000214796	128.759	-0.348921	0.208916	-1.67015	0.0948893	0.437758
ENSG00000107890	172.648	-0.34881	0.19382	-1.79966	0.071915	0.391434
ENSG00000173960	305.634	-0.348566	0.168782	-2.06518	0.0389061	0.293591
ENSG00000124688	287.81	-0.34838	0.174481	-1.99667	0.0458615	0.319495
ENSG00000155846	123.862	-0.348357	0.207631	-1.67778	0.093391	0.436031
ENSG00000111684	461.548	-0.348266	0.159727	-2.18038	0.0292295	0.260187
ENSG00000119326	1047.58	-0.348255	0.13443	-2.5906	0.00958086	0.149683
ENSG00000077514	513.476	-0.348243	0.162578	-2.142	0.0321933	0.272401
ENSG00000165494	570.837	-0.347864	0.155663	-2.23473	0.0254354	0.24548
ENSG00000073111	2545.5	-0.347715	0.117832	-2.95093	0.00316823	0.0785085
ENSG00000137168	1401.3	-0.347617	0.146258	-2.37673	0.0174668	0.201949
ENSG00000157227	1037.42	-0.347615	0.131426	-2.64495	0.00817021	0.139089
ENSG00000183060	142.643	-0.347599	0.205314	-1.69301	0.0904535	0.430367
ENSG00000106028	1508.52	-0.347499	0.134766	-2.57854	0.00992174	0.150898
ENSG00000135074	262.315	-0.34744	0.176759	-1.96562	0.0493426	0.3335
ENSG00000130477	815.33	-0.347403	0.142794	-2.4329	0.0149785	0.188018
ENSG00000134323	846.931	-0.347345	0.13456	-2.58134	0.00984186	0.150836
ENSG00000101670	119.478	-0.347297	0.214682	-1.61772	0.105722	0.457845
ENSG00000163377	92.4454	-0.347182	0.218755	-1.58708	0.112495	0.468786
ENSG00000100906	146.795	-0.346632	0.204894	-1.69176	0.0906923	0.430367
ENSG00000167528	71.9246	-0.34661	0.224918	-1.54105	0.123305	0.483819
ENSG00000128973	469.229	-0.346538	0.166873	-2.07666	0.0378333	0.289927
ENSG00000228002	42.3615	-0.346325	0.232931	-1.48681	0.137064	0.506871
ENSG00000106780	48.8787	-0.346235	0.232453	-1.48948	0.136361	0.506871
ENSG00000111237	325.543	-0.346208	0.169413	-2.04358	0.0409952	0.301038
ENSG00000174243	1424.97	-0.345933	0.135507	-2.55288	0.0106836	0.157625
ENSG00000119685	367.185	-0.34593	0.164016	-2.10912	0.0349338	0.282441
ENSG00000145703	1052.83	-0.345921	0.13296	-2.60169	0.00927654	0.147756
ENSG00000169955	68.9792	-0.345842	0.22602	-1.53014	0.125983	0.487964
ENSG00000118402	252.963	-0.3458	0.179544	-1.926	0.0541049	0.347419
ENSG00000164077	75.6795	-0.345759	0.226289	-1.52795	0.126524	0.488882
ENSG00000143434	194.362	-0.345736	0.188062	-1.83842	0.0660004	0.377609
ENSG00000122870	12.2424	-0.345715	0.196587	-1.75859	0.0786473	NA
ENSG00000172878	50.577	-0.345632	0.232317	-1.48776	0.136814	0.506871
ENSG00000197798	517.955	-0.345445	0.170513	-2.02591	0.0427737	0.307816
ENSG00000123545	337.668	-0.34524	0.176919	-1.9514	0.0510099	0.337681
ENSG00000145358	75.2358	-0.345213	0.229695	-1.50291	0.132861	0.499045
ENSG00000055044	1371.15	-0.345035	0.148555	-2.32261	0.0202002	0.21716
ENSG00000100916	163.142	-0.344934	0.196225	-1.75786	0.0787721	0.407874
ENSG00000183337	919.079	-0.344898	0.168652	-2.04503	0.0408523	0.300859
ENSG00000121440	131.414	-0.344867	0.207924	-1.65862	0.0971927	0.441793
ENSG00000165029	123.153	-0.344769	0.212025	-1.62608	0.103933	0.455787
ENSG00000085415	857.894	-0.3446	0.152105	-2.26555	0.0234792	0.234719
ENSG00000102390	362.418	-0.344203	0.164066	-2.09795	0.0359094	0.283804
ENSG00000080839	198.371	-0.344146	0.191025	-1.80158	0.0716117	0.390666
ENSG00000112208	312.305	-0.343994	0.168971	-2.03581	0.041769	0.303987
ENSG00000176399	62.184	-0.343924	0.228852	-1.50282	0.132885	0.499045
ENSG00000166454	1042.7	-0.34382	0.146616	-2.34504	0.0190252	0.210705
ENSG00000102699	783.899	-0.343795	0.137817	-2.49459	0.0126104	0.170566
ENSG00000174306	79.6156	-0.343768	0.224687	-1.52998	0.126021	0.487964
ENSG00000198429	103.348	-0.343363	0.214932	-1.59754	0.110145	0.466083
ENSG00000159917	37.7063	-0.343105	0.23249	-1.47579	0.140001	0.511525
ENSG00000128641	1255.73	-0.343076	0.141632	-2.4223	0.0154225	0.190682
ENSG00000047621	121.234	-0.342906	0.208486	-1.64475	0.100022	0.447657
ENSG00000113593	412.309	-0.342905	0.158019	-2.17003	0.0300049	0.26235
ENSG00000115129	182.938	-0.342829	0.19865	-1.72579	0.0843846	0.420064
ENSG00000166265	562.641	-0.342519	0.153074	-2.23761	0.0252467	0.24537
ENSG00000120948	2954.57	-0.342468	0.146394	-2.33935	0.0193171	0.211746
ENSG00000118513	73.6892	-0.342308	0.224116	-1.52737	0.126669	0.489295
ENSG00000081059	102.768	-0.342164	0.213289	-1.60423	0.108664	0.463392
ENSG00000136463	208.431	-0.342071	0.187405	-1.82531	0.067955	0.383079
ENSG00000225356	103.312	-0.342067	0.220406	-1.55199	0.120665	0.47981
ENSG00000157064	322.219	-0.341838	0.165291	-2.06809	0.0386313	0.292593
ENSG00000117899	770.059	-0.34179	0.150423	-2.27219	0.023075	0.232543
ENSG00000179958	524.542	-0.34176	0.166186	-2.05649	0.0397354	0.297922
ENSG00000150990	631.783	-0.341729	0.157694	-2.16703	0.0302323	0.262737
ENSG00000032742	58.5586	-0.341693	0.230547	-1.4821	0.138314	0.508262
ENSG00000178896	131.332	-0.34165	0.218294	-1.56509	0.117562	0.4756
ENSG00000076706	156.337	-0.341635	0.197047	-1.73377	0.0829587	0.417428
ENSG00000104635	3835.61	-0.341559	0.138642	-2.46361	0.0137545	0.179254
ENSG00000105705	319.435	-0.341377	0.173926	-1.96277	0.0496726	0.334697
ENSG00000159164	970.964	-0.341314	0.134812	-2.53178	0.0113484	0.164402
ENSG00000213160	1291.71	-0.341258	0.134817	-2.53126	0.0113652	0.164402
ENSG00000182022	104.478	-0.341016	0.216819	-1.57282	0.115761	0.472769
ENSG00000183586	27.5921	-0.340948	0.22927	-1.4871	0.136988	0.506871
ENSG00000151498	693.053	-0.340726	0.148456	-2.29514	0.0217251	0.225168
ENSG00000186310	657.244	-0.340689	0.146968	-2.31811	0.0204431	0.218491
ENSG00000152061	1578.82	-0.340633	0.122867	-2.77238	0.00556489	0.111883
ENSG00000157216	947.923	-0.340608	0.136074	-2.50311	0.0123109	0.168748
ENSG00000088756	221.393	-0.340572	0.185078	-1.84016	0.0657455	0.377133
ENSG00000166167	473.837	-0.340502	0.156767	-2.17202	0.0298542	0.262113
ENSG00000109689	215.688	-0.340434	0.185568	-1.83455	0.0665726	0.379284
ENSG00000165816	30.1113	-0.340293	0.230438	-1.47672	0.13975	0.510972
ENSG00000117569	677.182	-0.339742	0.171429	-1.98182	0.0474989	0.325518
ENSG00000123106	164.752	-0.339696	0.200943	-1.69051	0.0909307	0.430486
ENSG00000256771	427.747	-0.339651	0.156636	-2.16841	0.0301275	0.262428
ENSG00000111785	248.136	-0.339558	0.183358	-1.85188	0.0640426	0.37313
ENSG00000096401	986.952	-0.339536	0.143402	-2.36771	0.0178984	0.205312
ENSG00000118655	131.352	-0.339455	0.203915	-1.66469	0.0959747	0.440015
ENSG00000233098	283.098	-0.339381	0.172481	-1.96764	0.0491096	0.332298
ENSG00000065559	563.928	-0.33926	0.151432	-2.24034	0.0250686	0.2447
ENSG00000110697	352.316	-0.339192	0.16661	-2.03585	0.0417657	0.303987
ENSG00000256663	86.484	-0.339173	0.223547	-1.51724	0.129207	0.492989
ENSG00000167600	2962.34	-0.339143	0.125462	-2.70315	0.00686863	0.125592
ENSG00000176095	547.205	-0.33888	0.155323	-2.18177	0.0291263	0.25999
ENSG00000095319	1903.26	-0.338612	0.124285	-2.72448	0.00644024	0.121213
ENSG00000143401	2805.04	-0.338611	0.138598	-2.44311	0.0145614	0.184876
ENSG00000152455	428.278	-0.338581	0.166637	-2.03185	0.042169	0.305982
ENSG00000143093	448.177	-0.338344	0.162113	-2.0871	0.0368795	0.28638
ENSG00000221823	458.166	-0.338315	0.161747	-2.09163	0.0364715	0.285452
ENSG00000132561	171.22	-0.338137	0.201605	-1.67723	0.0934976	0.436031
ENSG00000131153	595.37	-0.338009	0.153104	-2.20771	0.0272646	0.252502
ENSG00000233225	250.436	-0.337888	0.182011	-1.85641	0.0633947	0.371827
ENSG00000113312	737.134	-0.337772	0.152767	-2.21103	0.0270337	0.252429
ENSG00000175893	157.897	-0.337664	0.200894	-1.68081	0.0928006	0.43474
ENSG00000073969	316.103	-0.337556	0.176741	-1.90989	0.0561469	0.352594
ENSG00000120370	109.444	-0.337366	0.213809	-1.57788	0.114592	0.470931
ENSG00000167191	1530.26	-0.337266	0.124395	-2.71125	0.00670303	0.124033
ENSG00000166451	327.708	-0.3372	0.173851	-1.93959	0.0524299	0.342294
ENSG00000185379	57.4542	-0.337178	0.231678	-1.45537	0.145566	0.520471
ENSG00000125454	77.9627	-0.336844	0.223952	-1.50409	0.132558	0.498831
ENSG00000132603	639.955	-0.336801	0.155029	-2.1725	0.0298176	0.262101
ENSG00000083099	180.985	-0.336774	0.207784	-1.62079	0.105063	0.456566
ENSG00000168159	998.29	-0.33667	0.138701	-2.42731	0.0152113	0.189198
ENSG00000138386	451.516	-0.336401	0.159627	-2.10743	0.0350807	0.283205
ENSG00000136522	654.969	-0.336244	0.162562	-2.0684	0.0386021	0.292593
ENSG00000050393	429.381	-0.336147	0.160517	-2.09416	0.0362459	0.285043
ENSG00000168143	44.41	-0.335878	0.232697	-1.44341	0.148904	0.525632
ENSG00000263179	66.6006	-0.335834	0.227748	-1.47459	0.140324	0.511592
ENSG00000151725	1018.98	-0.335647	0.143012	-2.34699	0.0189259	0.210241
ENSG00000174151	67.6561	-0.335592	0.227977	-1.47205	0.141008	0.513325
ENSG00000131848	35.7935	-0.33558	0.232011	-1.44639	0.148067	0.524299
ENSG00000226723	104.368	-0.335571	0.216853	-1.54746	0.121752	0.481605
ENSG00000107614	195.409	-0.335509	0.19067	-1.75963	0.0784699	0.407347
ENSG00000148120	64.515	-0.33538	0.227386	-1.47494	0.14023	0.511592
ENSG00000107130	574.629	-0.335282	0.14695	-2.28161	0.0225122	0.229703
ENSG00000178146	33.9035	-0.335239	0.231838	-1.44601	0.148175	0.524539
ENSG00000111641	816.37	-0.335148	0.14477	-2.31503	0.0206111	0.219029
ENSG00000064933	648.49	-0.3351	0.15426	-2.17231	0.0298324	0.262101
ENSG00000047457	12.961	-0.335057	0.200998	-1.66697	0.0955203	NA
ENSG00000170989	25.704	-0.335057	0.225749	-1.4842	0.137756	0.507969
ENSG00000116815	35.6357	-0.334761	0.232357	-1.44072	0.149663	0.525747
ENSG00000152578	183.61	-0.334727	0.201554	-1.66073	0.0967679	0.440622
ENSG00000100473	118.659	-0.334634	0.208047	-1.60845	0.107736	0.461713
ENSG00000164663	444.25	-0.334617	0.154105	-2.17136	0.0299042	0.262303
ENSG00000151572	20.7883	-0.334578	0.218562	-1.53082	0.125815	NA
ENSG00000072786	199.987	-0.334563	0.187864	-1.78088	0.0749321	0.398593
ENSG00000198130	317.631	-0.334463	0.178752	-1.8711	0.0613311	0.367014
ENSG00000167566	355.175	-0.3343	0.161395	-2.07132	0.0383288	0.291981
ENSG00000237943	127.614	-0.334182	0.204325	-1.63554	0.101936	0.452125
ENSG00000095794	140.009	-0.334168	0.205833	-1.62349	0.104484	0.456451
ENSG00000236714	111.373	-0.334123	0.211725	-1.5781	0.114543	0.470931
ENSG00000162694	725.273	-0.333949	0.16609	-2.01065	0.0443624	0.314258
ENSG00000083720	583.203	-0.333922	0.152098	-2.19544	0.028132	0.255557
ENSG00000177889	1961.94	-0.333913	0.143513	-2.32671	0.0199805	0.21544
ENSG00000178921	2024.08	-0.333657	0.134839	-2.47448	0.0133432	0.176935
ENSG00000165271	907.336	-0.333656	0.139794	-2.38677	0.016997	0.199809
ENSG00000196787	25.2208	-0.333642	0.226266	-1.47455	0.140333	0.511592
ENSG00000117408	290.56	-0.333546	0.170269	-1.95894	0.0501201	0.336279
ENSG00000165480	707.533	-0.333281	0.158932	-2.097	0.0359933	0.283831
ENSG00000155666	73.8182	-0.333247	0.224	-1.48771	0.136827	0.506871
ENSG00000144848	422.753	-0.332991	0.173486	-1.91942	0.0549314	0.349752
ENSG00000176274	62.8702	-0.332905	0.229712	-1.44923	0.147274	0.522903
ENSG00000151364	58.2052	-0.332723	0.230774	-1.44177	0.149367	0.525651
ENSG00000101294	761.491	-0.332377	0.139062	-2.39014	0.0168418	0.199024
ENSG00000074803	19.1954	-0.332216	0.213889	-1.55322	0.120372	NA
ENSG00000168395	406.154	-0.332117	0.158607	-2.09396	0.0362632	0.285043
ENSG00000254252	6.18961	-0.332087	0.155942	-2.12955	0.0332089	NA
ENSG00000186787	24.0451	-0.331931	0.222888	-1.48923	0.136427	NA
ENSG00000239672	780.852	-0.331846	0.144724	-2.29295	0.0218507	0.225644
ENSG00000164332	735.491	-0.331625	0.153973	-2.15379	0.0312568	0.267119
ENSG00000260362	8.50315	-0.33132	0.175175	-1.89137	0.0585756	NA
ENSG00000259051	119.821	-0.331	0.209093	-1.58303	0.113415	0.469604
ENSG00000149485	2710.93	-0.330997	0.135067	-2.45062	0.0142612	0.18277
ENSG00000121210	453.886	-0.330976	0.163544	-2.02378	0.0429929	0.30866
ENSG00000181061	1276.83	-0.330945	0.157957	-2.09516	0.0361572	0.284558
ENSG00000121579	2606.26	-0.330852	0.130983	-2.52592	0.0115395	0.165498
ENSG00000109320	99.0511	-0.330808	0.215339	-1.53622	0.124484	0.485589
ENSG00000138385	2323.68	-0.330642	0.13761	-2.40274	0.0162726	0.196496
ENSG00000219891	15.2308	-0.330635	0.20831	-1.58722	0.112462	NA
ENSG00000197774	51.042	-0.330606	0.23137	-1.42891	0.153031	0.530606
ENSG00000131831	16.4255	-0.330596	0.21218	-1.55809	0.119211	NA
ENSG00000172175	305.69	-0.330574	0.182951	-1.8069	0.0707775	0.387916
ENSG00000175832	1139.78	-0.330554	0.131659	-2.51069	0.0120495	0.167752
ENSG00000005249	637.136	-0.330538	0.151714	-2.17869	0.0293546	0.260198
ENSG00000180530	154.301	-0.330148	0.197986	-1.66753	0.0954087	0.438915
ENSG00000103742	214.294	-0.330114	0.183201	-1.80193	0.071557	0.390666
ENSG00000164402	572.879	-0.329886	0.145209	-2.2718	0.0230985	0.232543
ENSG00000101057	2123.15	-0.329641	0.136192	-2.42042	0.0155027	0.190904
ENSG00000149328	56.2404	-0.329303	0.230812	-1.42671	0.153662	0.532077
ENSG00000116016	17.3364	-0.329278	0.209934	-1.56848	0.116769	NA
ENSG00000171853	311.788	-0.329125	0.167218	-1.96824	0.0490407	0.332111
ENSG00000174173	594.693	-0.328914	0.158077	-2.08072	0.03746	0.288098
ENSG00000116096	55.9463	-0.328913	0.230683	-1.42582	0.15392	0.532825
ENSG00000101811	355.232	-0.328771	0.166637	-1.97297	0.0484985	0.330253
ENSG00000136819	506.153	-0.328218	0.157006	-2.09048	0.0365744	0.285452
ENSG00000020129	493.104	-0.327748	0.152688	-2.14653	0.0318309	0.270763
ENSG00000151322	7.53021	-0.327468	0.171964	-1.90428	0.0568736	NA
ENSG00000198668	3090.09	-0.327423	0.130483	-2.50933	0.0120962	0.168037
ENSG00000060971	119.787	-0.327377	0.207139	-1.58047	0.113998	0.470862
ENSG00000254615	42.8659	-0.327355	0.232802	-1.40615	0.15968	0.539271
ENSG00000167004	5478.79	-0.327119	0.123784	-2.64265	0.00822603	0.139119
ENSG00000148459	108.917	-0.327091	0.216189	-1.51299	0.130282	0.494911
ENSG00000180376	179.71	-0.327041	0.195846	-1.66988	0.0949422	0.437758
ENSG00000078668	1155.36	-0.326987	0.138545	-2.36015	0.0182674	0.207322
ENSG00000122435	135.279	-0.326934	0.21061	-1.55232	0.120586	0.479654
ENSG00000144040	268.212	-0.326749	0.189489	-1.72437	0.0846414	0.42013
ENSG00000186205	404.429	-0.32667	0.159743	-2.04497	0.0408574	0.300859
ENSG00000125814	135.898	-0.32659	0.206254	-1.58343	0.113323	0.469532
ENSG00000114126	839.195	-0.326364	0.145863	-2.23746	0.025256	0.24537
ENSG00000164305	1006.32	-0.326351	0.149502	-2.18293	0.0290412	0.25941
ENSG00000197451	4109.72	-0.326163	0.126879	-2.57066	0.0101504	0.151677
ENSG00000160229	51.0183	-0.326144	0.232117	-1.40509	0.159996	0.539271
ENSG00000137078	43.4245	-0.326084	0.232808	-1.40066	0.161316	0.539519
ENSG00000177459	20.8779	-0.326081	0.22133	-1.47328	0.140676	NA
ENSG00000118298	699.201	-0.325959	0.140066	-2.32719	0.0199554	0.21544
ENSG00000136159	660.425	-0.325882	0.155099	-2.10112	0.0356305	0.283804
ENSG00000101844	29.7248	-0.325677	0.226596	-1.43726	0.150645	0.526027
ENSG00000065361	876.124	-0.325504	0.135993	-2.39354	0.0166868	0.198852
ENSG00000175348	113.194	-0.32546	0.209559	-1.55307	0.120406	0.479654
ENSG00000006712	366.976	-0.325458	0.173964	-1.87084	0.0613677	0.367062
ENSG00000176387	249.327	-0.325334	0.177759	-1.83019	0.0672209	0.382384
ENSG00000124120	257.435	-0.325109	0.182245	-1.78391	0.0744378	0.397291
ENSG00000021574	564.35	-0.325074	0.152462	-2.13216	0.0329934	0.274933
ENSG00000170502	355.226	-0.325035	0.161617	-2.01115	0.0443098	0.314233
ENSG00000140015	9.78456	-0.324884	0.187455	-1.73313	0.0830723	NA
ENSG00000160953	334.607	-0.324804	0.167142	-1.94328	0.0519829	0.340957
ENSG00000197872	93.536	-0.324774	0.21828	-1.48788	0.136782	0.506871
ENSG00000106591	593.01	-0.324764	0.163857	-1.982	0.0474791	0.325518
ENSG00000138698	417.025	-0.324746	0.158172	-2.05312	0.0400614	0.29897
ENSG00000105204	123.492	-0.324689	0.208761	-1.55531	0.119872	0.479152
ENSG00000238123	10.009	-0.324473	0.18022	-1.80042	0.0717938	NA
ENSG00000182544	170.858	-0.324323	0.198386	-1.63481	0.102089	0.452626
ENSG00000164032	4977.47	-0.324241	0.13319	-2.43441	0.0149159	0.187867
ENSG00000272579	24.2919	-0.3241	0.226282	-1.43228	0.152064	NA
ENSG00000151090	21.5576	-0.324086	0.222496	-1.45659	0.14523	NA
ENSG00000131969	32.5181	-0.32405	0.229543	-1.41172	0.158034	0.538497
ENSG00000197385	68.1453	-0.323855	0.225924	-1.43347	0.151725	0.527661
ENSG00000115884	626.78	-0.323255	0.14588	-2.2159	0.0266986	0.251617
ENSG00000168818	178.651	-0.323215	0.191092	-1.69141	0.0907583	0.430367
ENSG00000108179	836.922	-0.323145	0.141913	-2.27706	0.0227826	0.231581
ENSG00000163629	1673.43	-0.322887	0.122878	-2.62769	0.00859663	0.142306
ENSG00000125166	2413.22	-0.322696	0.121959	-2.64594	0.00814641	0.138868
ENSG00000119042	27.1906	-0.322327	0.228972	-1.40771	0.159217	0.538811
ENSG00000243701	28.8948	-0.322174	0.230133	-1.39995	0.16153	0.539806
ENSG00000183978	343.74	-0.322115	0.16646	-1.93509	0.052979	0.343436
ENSG00000233588	82.2006	-0.321875	0.223671	-1.43906	0.150134	0.526027
ENSG00000100714	2998.07	-0.321652	0.122525	-2.6252	0.00865988	0.142877
ENSG00000101333	153.824	-0.321571	0.19908	-1.61528	0.106249	0.458579
ENSG00000109084	1498.59	-0.321553	0.136683	-2.35254	0.0186456	0.209026
ENSG00000112167	64.727	-0.32148	0.228687	-1.40577	0.159794	0.539271
ENSG00000143748	363.165	-0.321254	0.176194	-1.8233	0.0682586	0.383611
ENSG00000063761	109.344	-0.320727	0.211219	-1.51845	0.128901	0.492578
ENSG00000105854	228.187	-0.320669	0.18827	-1.70324	0.0885236	0.427337
ENSG00000154864	336.285	-0.320621	0.166831	-1.92183	0.0546269	0.349175
ENSG00000198042	504.542	-0.320554	0.158573	-2.0215	0.0432281	0.309641
ENSG00000234176	28.3941	-0.320533	0.228585	-1.40225	0.16084	0.539519
ENSG00000179041	384.879	-0.319896	0.159582	-2.00459	0.0450066	0.316869
ENSG00000107443	734.274	-0.319856	0.141914	-2.25386	0.0242049	0.240104
ENSG00000197780	197.448	-0.319789	0.191645	-1.66865	0.0951863	0.438239
ENSG00000070061	760.089	-0.319748	0.14224	-2.24795	0.0245793	0.242153
ENSG00000176422	150.696	-0.319727	0.198291	-1.61241	0.106872	0.459413
ENSG00000057757	620.447	-0.319514	0.152848	-2.0904	0.0365821	0.285452
ENSG00000124749	46.7191	-0.319464	0.232811	-1.3722	0.170001	0.5521
ENSG00000147536	478.945	-0.319409	0.162212	-1.96909	0.0489432	0.331942
ENSG00000135272	161.191	-0.319298	0.196167	-1.62769	0.103591	0.454824
ENSG00000102043	45.4988	-0.318872	0.232751	-1.37002	0.170681	0.553109
ENSG00000171444	287.965	-0.318801	0.186819	-1.70647	0.0879202	0.42624
ENSG00000130717	376.584	-0.318716	0.16133	-1.97555	0.0482058	0.329308
ENSG00000011009	970.902	-0.318526	0.137563	-2.3155	0.0205854	0.219029
ENSG00000104626	288.875	-0.318439	0.172523	-1.84577	0.0649254	0.375397
ENSG00000072121	465.948	-0.318436	0.152094	-2.09368	0.0362883	0.285065
ENSG00000140992	188.636	-0.318415	0.18853	-1.68894	0.0912311	0.430688
ENSG00000101452	360.299	-0.318042	0.173803	-1.82989	0.0672657	0.382384
ENSG00000160218	603.575	-0.317999	0.143602	-2.21445	0.0267977	0.252106
ENSG00000188931	72.6049	-0.317896	0.225168	-1.41181	0.158005	0.538497
ENSG00000197937	144.211	-0.31743	0.200943	-1.5797	0.114175	0.470866
ENSG00000183496	135.83	-0.317253	0.20204	-1.57025	0.116358	0.472857
ENSG00000164684	105.084	-0.316921	0.213591	-1.48377	0.137869	0.508114
ENSG00000134824	5731.69	-0.316572	0.125864	-2.51519	0.0118968	0.166969
ENSG00000188167	31.3393	-0.31651	0.230826	-1.3712	0.170311	0.552496
ENSG00000038532	166.234	-0.316507	0.196233	-1.61291	0.106763	0.459413
ENSG00000151422	136.256	-0.316279	0.217273	-1.45567	0.145483	0.520463
ENSG00000117598	63.9082	-0.316238	0.228153	-1.38608	0.165722	0.54598
ENSG00000140323	23.0618	-0.316204	0.224786	-1.40669	0.15952	NA
ENSG00000271976	30.7315	-0.316118	0.229268	-1.37882	0.167952	0.549868
ENSG00000166477	392.675	-0.316029	0.164826	-1.91734	0.0551945	0.350334
ENSG00000159307	111.481	-0.315893	0.211085	-1.49652	0.134518	0.503258
ENSG00000109270	292.25	-0.31588	0.173247	-1.8233	0.0682585	0.383611
ENSG00000138678	12.5906	-0.315837	0.199818	-1.58062	0.113965	NA
ENSG00000112365	338.914	-0.315683	0.163837	-1.92681	0.0540032	0.347113
ENSG00000121039	78.9961	-0.315679	0.224681	-1.40501	0.160018	0.539271
ENSG00000267886	97.1651	-0.315457	0.216207	-1.45905	0.14455	0.519151
ENSG00000162650	71.2479	-0.315442	0.226249	-1.39422	0.16325	0.542449
ENSG00000165806	34.1663	-0.315435	0.231931	-1.36004	0.173818	0.557225
ENSG00000154930	11.2204	-0.315324	0.189439	-1.66452	0.0960086	NA
ENSG00000185442	166.164	-0.315238	0.195186	-1.61506	0.106297	0.45863
ENSG00000153531	8.88263	-0.31511	0.176777	-1.78252	0.0746638	NA
ENSG00000137338	128.229	-0.315101	0.208346	-1.51239	0.130434	0.495193
ENSG00000028528	587.702	-0.31509	0.157662	-1.99851	0.0456611	0.319056
ENSG00000143630	45.0431	-0.315083	0.232893	-1.35291	0.176086	0.559292
ENSG00000233868	37.3717	-0.314972	0.232661	-1.35378	0.175806	0.55899
ENSG00000111845	608.24	-0.314968	0.163151	-1.93053	0.0535412	0.345528
ENSG00000106144	432.318	-0.314952	0.159974	-1.96877	0.0489793	0.331942
ENSG00000127947	1654.16	-0.314864	0.125193	-2.51503	0.0119022	0.166969
ENSG00000162437	445.244	-0.314744	0.159678	-1.97111	0.048711	0.330822
ENSG00000188352	782.385	-0.314663	0.145873	-2.15711	0.0309973	0.265431
ENSG00000065029	230.651	-0.314636	0.18216	-1.72725	0.0841224	0.419657
ENSG00000189376	28.3208	-0.314586	0.227983	-1.37987	0.167628	0.549317
ENSG00000132323	205.064	-0.314525	0.191617	-1.64143	0.100708	0.448733
ENSG00000163734	26.7519	-0.314417	0.227084	-1.38458	0.16618	0.546804
ENSG00000121236	164.54	-0.31427	0.202645	-1.55084	0.12094	0.48002
ENSG00000214425	29.9177	-0.314115	0.229933	-1.36612	0.171902	0.554686
ENSG00000101938	262.215	-0.314072	0.178836	-1.7562	0.0790536	0.408475
ENSG00000170961	54.1295	-0.313912	0.231676	-1.35496	0.175429	0.558927
ENSG00000155629	41.4724	-0.313716	0.232899	-1.347	0.17798	0.561438
ENSG00000182810	176.19	-0.313493	0.198651	-1.57811	0.114541	0.470931
ENSG00000166341	207.619	-0.313455	0.184966	-1.69466	0.0901402	0.429967
ENSG00000109472	183.301	-0.313451	0.197389	-1.58799	0.112288	0.468786
ENSG00000136279	358.575	-0.313447	0.166538	-1.88213	0.0598181	0.363038
ENSG00000125630	931.32	-0.313426	0.136452	-2.29697	0.0216204	0.224712
ENSG00000134318	572.312	-0.313296	0.147498	-2.12408	0.0336637	0.277347
ENSG00000180611	241.526	-0.313125	0.183314	-1.70813	0.0876116	0.42624
ENSG00000142892	327.388	-0.313121	0.165922	-1.88716	0.0591389	0.361056
ENSG00000135249	199.539	-0.313039	0.196938	-1.58953	0.111941	0.468349
ENSG00000132780	9138.17	-0.312964	0.117702	-2.65896	0.00783815	0.135148
ENSG00000151491	67.2373	-0.312961	0.226498	-1.38174	0.167053	0.548094
ENSG00000140471	83.2983	-0.312642	0.22274	-1.40362	0.160433	0.539519
ENSG00000108443	400.544	-0.31254	0.164744	-1.89713	0.0578114	0.358369
ENSG00000134575	204.579	-0.312374	0.185583	-1.6832	0.0923366	0.433833
ENSG00000125863	478.886	-0.312337	0.166444	-1.87652	0.0605836	0.365437
ENSG00000226666	121.459	-0.312133	0.206907	-1.50857	0.131409	0.497755
ENSG00000197170	973.144	-0.312112	0.151863	-2.05522	0.0398582	0.298147
ENSG00000124802	274.735	-0.312013	0.18693	-1.66914	0.0950887	0.438011
ENSG00000177707	536.002	-0.311962	0.162719	-1.91719	0.0552139	0.350334
ENSG00000107290	843.646	-0.311751	0.140669	-2.2162	0.0266777	0.251605
ENSG00000107201	106.85	-0.311608	0.215246	-1.44768	0.147706	0.523454
ENSG00000145365	24.5772	-0.311507	0.226107	-1.37769	0.168298	NA
ENSG00000157637	324.669	-0.311472	0.172466	-1.80599	0.0709201	0.388366
ENSG00000135048	869.075	-0.311469	0.139906	-2.22627	0.0259958	0.248091
ENSG00000235106	178.148	-0.311463	0.192157	-1.62088	0.105044	0.456566
ENSG00000130165	544.013	-0.311402	0.161169	-1.93215	0.0533408	0.344456
ENSG00000147654	197.705	-0.31127	0.190703	-1.63222	0.102632	0.452669
ENSG00000138448	804.392	-0.311176	0.146866	-2.11878	0.0341094	0.279595
ENSG00000166902	590.401	-0.311092	0.151351	-2.05544	0.0398368	0.298147
ENSG00000198301	694.964	-0.311089	0.15664	-1.98601	0.0470321	0.324159
ENSG00000076043	483.532	-0.310679	0.163787	-1.89685	0.0578482	0.358369
ENSG00000078140	2773.03	-0.310603	0.122538	-2.53475	0.0112528	0.163755
ENSG00000160075	1090.54	-0.310569	0.131653	-2.35899	0.0183247	0.207501
ENSG00000125818	725.742	-0.310549	0.143041	-2.17105	0.0299277	0.262303
ENSG00000114279	111.635	-0.310289	0.213969	-1.45016	0.147014	0.522746
ENSG00000115241	2599.52	-0.310195	0.123358	-2.51459	0.011917	0.166994
ENSG00000197903	52.4629	-0.310044	0.232503	-1.33351	0.182366	0.566729
ENSG00000029153	175.704	-0.309786	0.191479	-1.61786	0.105693	0.457845
ENSG00000008056	96.0908	-0.309712	0.216088	-1.43327	0.151781	0.527661
ENSG00000146386	1217.96	-0.309608	0.141631	-2.18603	0.0288135	0.258671
ENSG00000138814	688.2	-0.309604	0.142187	-2.17744	0.0294476	0.260431
ENSG00000176903	628.178	-0.309445	0.142781	-2.16728	0.0302138	0.262737
ENSG00000132541	393.739	-0.309421	0.161712	-1.9134	0.0556965	0.351779
ENSG00000198824	671.02	-0.309158	0.14324	-2.15832	0.0309032	0.265218
ENSG00000196387	107.748	-0.309101	0.214342	-1.44209	0.149277	0.525651
ENSG00000064490	191.837	-0.309007	0.200066	-1.54452	0.122462	0.482183
ENSG00000179242	131.39	-0.308987	0.207588	-1.48846	0.136629	0.506871
ENSG00000151332	253.656	-0.308929	0.176638	-1.74894	0.0803019	0.410823
ENSG00000235944	21.1451	-0.308883	0.221951	-1.39167	0.164023	NA
ENSG00000196793	81.7864	-0.308792	0.222532	-1.38763	0.165251	0.544982
ENSG00000119541	480.137	-0.308717	0.15319	-2.01526	0.0438775	0.312895
ENSG00000104450	22.8294	-0.30867	0.223659	-1.38009	0.167559	NA
ENSG00000144339	12.9773	-0.308016	0.202055	-1.52442	0.127404	NA
ENSG00000132002	927.587	-0.307918	0.153399	-2.0073	0.0447175	0.315875
ENSG00000186197	31.4684	-0.307838	0.230524	-1.33538	0.181751	0.565723
ENSG00000121152	740.322	-0.307797	0.14804	-2.07915	0.0376032	0.289027
ENSG00000110321	13407.2	-0.307735	0.131204	-2.34546	0.0190034	0.210646
ENSG00000157870	396.776	-0.307648	0.168709	-1.82355	0.0682206	0.383611
ENSG00000129422	58.9822	-0.307439	0.229723	-1.3383	0.180797	0.564376
ENSG00000117707	9.6719	-0.307422	0.185245	-1.65954	0.0970062	NA
ENSG00000240132	43.3705	-0.307418	0.232857	-1.3202	0.186768	0.573109
ENSG00000112081	6542.76	-0.307351	0.126269	-2.43411	0.0149286	0.187867
ENSG00000137968	31.903	-0.307325	0.231667	-1.32658	0.184647	0.570249
ENSG00000183876	47.3144	-0.30725	0.23292	-1.31912	0.187129	0.573541
ENSG00000134371	738.895	-0.306942	0.142576	-2.15282	0.0313326	0.267588
ENSG00000031003	176.577	-0.306919	0.203455	-1.50853	0.131419	0.497755
ENSG00000234645	112.003	-0.306872	0.210523	-1.45767	0.144933	0.519797
ENSG00000272520	45.1819	-0.306626	0.232885	-1.31664	0.187959	0.574574
ENSG00000078725	273.092	-0.306595	0.183263	-1.67298	0.0943314	0.437496
ENSG00000136021	590.037	-0.306499	0.156866	-1.9539	0.0507134	0.336586
ENSG00000260065	60.5077	-0.306425	0.229542	-1.33494	0.181897	0.565745
ENSG00000197444	206.171	-0.306282	0.194304	-1.5763	0.114956	0.470949
ENSG00000105447	706.781	-0.306241	0.148128	-2.0674	0.038696	0.292694
ENSG00000100292	242.518	-0.306203	0.197201	-1.55274	0.120485	0.479654
ENSG00000006715	580.664	-0.306193	0.155075	-1.97448	0.0483273	0.329611
ENSG00000140650	184.379	-0.306185	0.203427	-1.50513	0.13229	0.49858
ENSG00000164683	11.2295	-0.306143	0.194277	-1.5758	0.115071	NA
ENSG00000123684	282.907	-0.306122	0.174065	-1.75867	0.0786342	0.407488
ENSG00000212747	66.1829	-0.306121	0.22735	-1.34648	0.178149	0.561438
ENSG00000134996	102.843	-0.305902	0.21522	-1.42134	0.155217	0.534549
ENSG00000163393	33.8338	-0.305773	0.231873	-1.31871	0.187266	0.573688
ENSG00000142961	46.1624	-0.30576	0.232612	-1.31446	0.188691	0.575715
ENSG00000159166	296.585	-0.305749	0.170809	-1.79001	0.0734522	0.39583
ENSG00000156469	327.011	-0.305736	0.171704	-1.7806	0.0749774	0.398593
ENSG00000151726	118.202	-0.305652	0.208514	-1.46586	0.142687	0.516217
ENSG00000164163	1622.27	-0.305557	0.137358	-2.22454	0.0261124	0.249018
ENSG00000167721	1321.65	-0.30554	0.149284	-2.0467	0.0406872	0.300756
ENSG00000077264	101.764	-0.305509	0.216774	-1.40934	0.158734	0.538609
ENSG00000143643	89.6679	-0.305427	0.218729	-1.39637	0.162603	0.541136
ENSG00000138794	258.286	-0.305375	0.179477	-1.70147	0.0888555	0.428134
ENSG00000164048	1253.68	-0.305347	0.128506	-2.37613	0.0174951	0.201949
ENSG00000088035	362.468	-0.305308	0.169586	-1.80032	0.0718104	0.391239
ENSG00000169122	43.9068	-0.305124	0.23291	-1.31005	0.190178	0.578878
ENSG00000233369	64.9839	-0.305023	0.227436	-1.34114	0.179875	0.563553
ENSG00000168116	269.201	-0.304934	0.174638	-1.74609	0.0807947	0.412408
ENSG00000182473	628.65	-0.30468	0.162077	-1.87984	0.0601295	0.363896
ENSG00000175727	673.833	-0.304541	0.146904	-2.07306	0.0381668	0.291439
ENSG00000072401	525.636	-0.304454	0.16142	-1.8861	0.0592814	0.361662
ENSG00000177971	442.147	-0.30445	0.157285	-1.93565	0.0529101	0.343354
ENSG00000167797	292.698	-0.303869	0.18011	-1.68713	0.0915789	0.431537
ENSG00000115875	3392.98	-0.303842	0.120653	-2.51831	0.0117921	0.166333
ENSG00000100422	952.238	-0.303803	0.132871	-2.28646	0.0222274	0.227884
ENSG00000149260	364.372	-0.303727	0.160912	-1.88753	0.059089	0.361003
ENSG00000115380	224.716	-0.30355	0.185941	-1.63251	0.102573	0.452669
ENSG00000116704	94.7253	-0.303302	0.216381	-1.4017	0.161004	0.539519
ENSG00000118246	569.426	-0.303183	0.151738	-1.99807	0.045709	0.319217
ENSG00000100038	220.245	-0.303173	0.189404	-1.60067	0.109451	0.46474
ENSG00000092531	501.285	-0.303123	0.164064	-1.84759	0.0646623	0.37472
ENSG00000104147	139.319	-0.303054	0.205997	-1.47116	0.141248	0.513759
ENSG00000152484	419.033	-0.30298	0.159687	-1.89734	0.0577833	0.358369
ENSG00000189298	127.764	-0.302837	0.205468	-1.47389	0.140511	0.511948
ENSG00000139767	33.0963	-0.302615	0.23122	-1.30877	0.190611	0.579639
ENSG00000166913	4149.65	-0.302451	0.127226	-2.37727	0.0174412	0.201949
ENSG00000104738	4743.42	-0.302444	0.141893	-2.13148	0.0330493	0.274933
ENSG00000116833	73.454	-0.302408	0.225001	-1.34403	0.178938	0.562891
ENSG00000174749	14.6829	-0.302272	0.206309	-1.46514	0.142882	NA
ENSG00000163002	515.98	-0.302177	0.155528	-1.94292	0.052026	0.341016
ENSG00000073417	42.6765	-0.302083	0.232874	-1.29719	0.194564	0.584448
ENSG00000140563	22.9351	-0.302078	0.223578	-1.35111	0.176661	NA
ENSG00000070882	218.127	-0.302006	0.181624	-1.66281	0.0963508	0.440441
ENSG00000138031	268.779	-0.301995	0.173259	-1.74302	0.0813301	0.413611
ENSG00000244026	96.4139	-0.301943	0.216089	-1.39731	0.162321	0.540959
ENSG00000104320	494.701	-0.301872	0.161887	-1.86471	0.0622225	0.36908
ENSG00000197279	71.3049	-0.301534	0.22583	-1.33523	0.181802	0.565723
ENSG00000144867	463.168	-0.301437	0.159364	-1.8915	0.0585581	0.359553
ENSG00000171723	169.536	-0.301337	0.19777	-1.52367	0.12759	0.490154
ENSG00000138297	516.128	-0.301318	0.157979	-1.90733	0.0564781	0.353291
ENSG00000058799	342.764	-0.301045	0.163612	-1.83999	0.0657703	0.377133
ENSG00000122566	19058.1	-0.300993	0.111007	-2.71147	0.00669856	0.124033
ENSG00000156642	1136.91	-0.300992	0.136715	-2.2016	0.0276934	0.254032
ENSG00000198331	115.67	-0.300896	0.214676	-1.40163	0.161027	0.539519
ENSG00000110148	88.2183	-0.300787	0.218333	-1.37765	0.16831	0.549868
ENSG00000172409	230.482	-0.300762	0.193055	-1.55791	0.119254	0.478207
ENSG00000141012	148.101	-0.300698	0.199841	-1.50469	0.132405	0.49858
ENSG00000205208	571.647	-0.30058	0.157107	-1.91322	0.0557203	0.351779
ENSG00000130347	198.825	-0.30056	0.186394	-1.61249	0.106855	0.459413
ENSG00000154813	494.52	-0.300508	0.169857	-1.76918	0.076863	0.403736
ENSG00000141002	490.708	-0.300504	0.160786	-1.86897	0.0616275	0.368101
ENSG00000166710	460.602	-0.300462	0.152389	-1.97167	0.0486469	0.330737
ENSG00000170727	63.2966	-0.300448	0.227886	-1.31841	0.187366	0.573855
ENSG00000198700	2314.41	-0.300175	0.12435	-2.41395	0.0157807	0.192968
ENSG00000249176	23.7818	-0.300087	0.224902	-1.3343	0.182106	NA
ENSG00000187607	230.608	-0.300017	0.189453	-1.5836	0.113286	0.469532
ENSG00000162385	437.881	-0.299982	0.165391	-1.81378	0.0697122	0.386866
ENSG00000154222	158.914	-0.299976	0.196485	-1.52671	0.126833	0.489485
ENSG00000184752	440.26	-0.299973	0.154723	-1.93878	0.0525278	0.342605
ENSG00000197818	162.874	-0.299683	0.194997	-1.53686	0.124327	0.485459
ENSG00000170619	132.207	-0.299672	0.207807	-1.44207	0.149282	0.525651
ENSG00000183655	252.4	-0.299273	0.178677	-1.67494	0.0939464	0.437358
ENSG00000104131	936.022	-0.299217	0.15944	-1.87667	0.0605631	0.365437
ENSG00000186141	286.119	-0.299171	0.181412	-1.64913	0.099121	0.446714
ENSG00000165300	70.4639	-0.299134	0.226604	-1.32008	0.18681	0.573109
ENSG00000256616	38.635	-0.299031	0.232902	-1.28394	0.199165	0.587801
ENSG00000046651	217.954	-0.299012	0.187753	-1.59258	0.111255	0.468065
ENSG00000204967	28.223	-0.298985	0.229808	-1.30102	0.193252	0.583254
ENSG00000116406	253.877	-0.298903	0.177637	-1.68266	0.0924408	0.433874
ENSG00000171517	323.686	-0.298897	0.165273	-1.80851	0.0705271	0.387209
ENSG00000177479	1094.24	-0.298775	0.148802	-2.00787	0.0446574	0.315651
ENSG00000147669	453.954	-0.298738	0.164362	-1.81757	0.0691303	0.385975
ENSG00000204711	171.039	-0.298617	0.203083	-1.47042	0.141448	0.514194
ENSG00000105793	219.402	-0.298577	0.1884	-1.58481	0.11301	0.46908
ENSG00000198646	230.6	-0.298533	0.180886	-1.65039	0.0988628	0.446198
ENSG00000177963	732.014	-0.298527	0.16189	-1.84401	0.0651813	0.37603
ENSG00000141380	1183.95	-0.298463	0.133006	-2.24398	0.0248339	0.243581
ENSG00000015475	315	-0.298379	0.169098	-1.76453	0.0776425	0.405185
ENSG00000155393	279.381	-0.298305	0.177251	-1.68295	0.0923845	0.433874
ENSG00000167604	36.832	-0.298295	0.231082	-1.29086	0.196751	0.586211
ENSG00000166479	351.431	-0.298258	0.16619	-1.79469	0.0727038	0.393766
ENSG00000090060	3962.49	-0.298132	0.135443	-2.20117	0.0277238	0.254032
ENSG00000112378	828.425	-0.298123	0.148211	-2.01148	0.0442743	0.314233
ENSG00000150787	122.318	-0.298122	0.206675	-1.44247	0.14917	0.525651
ENSG00000174775	148.801	-0.298119	0.205532	-1.45047	0.146927	0.522746
ENSG00000130749	611.587	-0.298056	0.143093	-2.08295	0.037256	0.287431
ENSG00000188985	369.04	-0.297825	0.161911	-1.83944	0.0658512	0.377133
ENSG00000114999	796.429	-0.297758	0.140832	-2.11428	0.0344917	0.280923
ENSG00000177542	385.631	-0.297558	0.163758	-1.81706	0.0692079	0.38624
ENSG00000035862	463.532	-0.297491	0.156135	-1.90534	0.0567355	0.3543
ENSG00000152092	151.046	-0.29745	0.200734	-1.48181	0.13839	0.508262
ENSG00000049323	758.413	-0.29741	0.137643	-2.16074	0.0307153	0.264977
ENSG00000186951	90.4814	-0.296977	0.219962	-1.35013	0.176973	0.560208
ENSG00000189266	58.3711	-0.296948	0.22945	-1.29417	0.195605	0.585539
ENSG00000121390	826.22	-0.296867	0.158519	-1.87275	0.0611033	0.366848
ENSG00000198963	125.777	-0.296711	0.208276	-1.42461	0.154271	0.533046
ENSG00000171302	385.881	-0.296507	0.16286	-1.82063	0.0686633	0.384795
ENSG00000122643	153.324	-0.296405	0.20321	-1.45862	0.14467	0.519293
ENSG00000066557	631.438	-0.296361	0.160869	-1.84225	0.0654386	0.376722
ENSG00000069974	59.5376	-0.296203	0.229169	-1.29251	0.196181	0.586149
ENSG00000124275	390.513	-0.29609	0.170749	-1.73406	0.0829076	0.417334
ENSG00000168439	3847.81	-0.296087	0.124	-2.3878	0.0169494	0.199598
ENSG00000139910	97.1454	-0.296086	0.21487	-1.37798	0.168209	0.549868
ENSG00000127463	919.945	-0.296001	0.134001	-2.20895	0.027178	0.252429
ENSG00000163156	224.317	-0.295936	0.184911	-1.60042	0.109504	0.464814
ENSG00000116285	604.892	-0.295431	0.148387	-1.99096	0.0464855	0.322186
ENSG00000000003	1107.4	-0.295139	0.139491	-2.11582	0.0343598	0.280205
ENSG00000243974	9.83194	-0.294851	0.187859	-1.56953	0.116525	NA
ENSG00000143970	726.138	-0.294849	0.140355	-2.10074	0.0356638	0.283804
ENSG00000204673	400.911	-0.294622	0.169982	-1.73326	0.0830503	0.417725
ENSG00000236698	325.815	-0.294572	0.177041	-1.66387	0.0961394	0.440416
ENSG00000162627	221.404	-0.294514	0.195354	-1.50759	0.131659	0.498065
ENSG00000181396	205.206	-0.294507	0.186252	-1.58123	0.113825	0.470781
ENSG00000256968	194.912	-0.294198	0.195242	-1.50684	0.131852	0.498471
ENSG00000196943	409.949	-0.294117	0.157622	-1.86597	0.062046	0.368757
ENSG00000177628	95.323	-0.294107	0.217858	-1.34999	0.177018	0.560208
ENSG00000240024	111.576	-0.294017	0.214675	-1.36959	0.170815	0.553169
ENSG00000124217	130.049	-0.293966	0.204909	-1.43462	0.151396	0.52748
ENSG00000112110	513.644	-0.293958	0.154285	-1.90529	0.0567424	0.3543
ENSG00000135655	361.212	-0.293836	0.173883	-1.68985	0.0910561	0.430522
ENSG00000142634	265.934	-0.293683	0.190382	-1.5426	0.122928	0.482983
ENSG00000180771	82.2844	-0.293495	0.227452	-1.29036	0.196926	0.586211
ENSG00000187391	291.928	-0.293278	0.175527	-1.67084	0.0947528	0.437758
ENSG00000116793	332.206	-0.293255	0.182403	-1.60773	0.107894	0.461717
ENSG00000075131	197.22	-0.293087	0.204485	-1.43329	0.151775	0.527661
ENSG00000114648	354.807	-0.292958	0.170576	-1.71746	0.085896	0.422437
ENSG00000142303	42.7089	-0.292905	0.232928	-1.25749	0.208575	0.598121
ENSG00000146216	41.5731	-0.292702	0.232904	-1.25675	0.208845	0.598121
ENSG00000169981	153.308	-0.292651	0.208936	-1.40067	0.161312	0.539519
ENSG00000136631	333.329	-0.292584	0.179443	-1.63051	0.102994	0.453371
ENSG00000253626	526.6	-0.292462	0.157517	-1.8567	0.0633544	0.371827
ENSG00000081386	216.865	-0.292451	0.183587	-1.59298	0.111164	0.467966
ENSG00000106588	92.7593	-0.292337	0.222547	-1.3136	0.188982	0.576329
ENSG00000152642	124.167	-0.292004	0.207304	-1.40858	0.15896	0.538609
ENSG00000101856	3112.92	-0.291981	0.124415	-2.34683	0.0189341	0.210241
ENSG00000048991	948.677	-0.291916	0.13785	-2.11763	0.034206	0.27985
ENSG00000146263	426.714	-0.291715	0.155534	-1.87557	0.0607137	0.365749
ENSG00000157150	27.3435	-0.291565	0.226705	-1.2861	0.19841	0.587494
ENSG00000259137	37.3563	-0.291541	0.230572	-1.26443	0.206077	0.595634
ENSG00000136950	410.106	-0.291489	0.162711	-1.79144	0.0732219	0.395405
ENSG00000106066	547.235	-0.291356	0.146865	-1.98383	0.0472744	0.324722
ENSG00000174371	478.865	-0.291331	0.159546	-1.826	0.0678498	0.382995
ENSG00000270145	47.0953	-0.291316	0.232519	-1.25287	0.210254	0.599737
ENSG00000132467	596.043	-0.291272	0.16068	-1.81274	0.0698717	0.386866
ENSG00000159792	373.058	-0.291092	0.174289	-1.67017	0.094886	0.437758
ENSG00000107518	100.361	-0.290991	0.214135	-1.35892	0.174173	0.557806
ENSG00000168802	286.077	-0.290975	0.173509	-1.677	0.0935428	0.436031
ENSG00000170270	70.5733	-0.290927	0.229403	-1.26819	0.204731	0.594371
ENSG00000178988	635.006	-0.290876	0.154653	-1.88083	0.0599951	0.363425
ENSG00000168216	215.685	-0.290777	0.188462	-1.54289	0.122857	0.482983
ENSG00000170035	608.335	-0.290748	0.148452	-1.95853	0.0501674	0.336279
ENSG00000134755	530.032	-0.290613	0.15625	-1.85993	0.062896	0.371012
ENSG00000174106	499.751	-0.290541	0.159132	-1.82579	0.0678826	0.383007
ENSG00000113810	1461.7	-0.290511	0.135498	-2.14403	0.0320308	0.271743
ENSG00000115392	289.362	-0.290475	0.183221	-1.58538	0.11288	0.46908
ENSG00000115112	53.6968	-0.290264	0.231868	-1.25185	0.210624	0.600527
ENSG00000257365	77.045	-0.290119	0.225194	-1.28831	0.19764	0.586927
ENSG00000135972	706.228	-0.28973	0.139161	-2.08198	0.0373443	0.287726
ENSG00000157212	432.996	-0.289699	0.165952	-1.74568	0.0808657	0.412408
ENSG00000235423	19.7346	-0.289534	0.217163	-1.33326	0.182446	NA
ENSG00000198945	241.885	-0.289523	0.183403	-1.57862	0.114424	0.470931
ENSG00000100462	868.43	-0.289334	0.154776	-1.86938	0.0615706	0.368071
ENSG00000124562	1328.78	-0.289306	0.128124	-2.25802	0.0239446	0.23789
ENSG00000163541	372.114	-0.289008	0.164266	-1.75939	0.0785118	0.407347
ENSG00000134900	1502.44	-0.289005	0.143991	-2.00711	0.0447382	0.315875
ENSG00000113966	49.1761	-0.288835	0.232428	-1.24269	0.213983	0.604012
ENSG00000196368	539.013	-0.288821	0.148839	-1.94049	0.0523197	0.34184
ENSG00000197312	787.466	-0.288814	0.136152	-2.12126	0.0339003	0.27876
ENSG00000263244	214.853	-0.288662	0.182368	-1.58285	0.113455	0.469604
ENSG00000168938	55.8348	-0.288494	0.23227	-1.24207	0.214212	0.604012
ENSG00000113327	12.0426	-0.288372	0.1979	-1.45716	0.145071	NA
ENSG00000172594	23.7624	-0.288297	0.22268	-1.29467	0.195435	NA
ENSG00000105171	207.507	-0.288243	0.189369	-1.52212	0.127978	0.49066
ENSG00000204514	283.37	-0.288211	0.179219	-1.60815	0.107803	0.461713
ENSG00000102935	595.578	-0.288193	0.156671	-1.83948	0.0658443	0.377133
ENSG00000155438	536.074	-0.288176	0.167395	-1.72154	0.0851538	0.421249
ENSG00000138660	317.029	-0.288147	0.178366	-1.61549	0.106206	0.458579
ENSG00000189403	4262.5	-0.288083	0.135276	-2.12959	0.0332052	0.275071
ENSG00000139428	219.598	-0.288058	0.181167	-1.59002	0.111831	0.468341
ENSG00000156603	132.078	-0.288	0.209502	-1.37469	0.169226	0.551457
ENSG00000132313	523.559	-0.287999	0.154364	-1.86571	0.0620819	0.368757
ENSG00000057019	1250.59	-0.28786	0.130795	-2.20085	0.0277464	0.254032
ENSG00000173674	1041.33	-0.287845	0.144777	-1.98819	0.0467905	0.323601
ENSG00000198298	59.764	-0.28783	0.229073	-1.2565	0.208936	0.598238
ENSG00000103174	67.1167	-0.287644	0.226845	-1.26802	0.204792	0.594371
ENSG00000105409	394.126	-0.287549	0.160321	-1.79358	0.0728801	0.394196
ENSG00000128805	73.9952	-0.287371	0.22396	-1.28313	0.199445	0.587848
ENSG00000106624	475.448	-0.28729	0.156196	-1.83929	0.0658719	0.377133
ENSG00000132485	982.167	-0.287289	0.158495	-1.81261	0.0698927	0.386866
ENSG00000143815	1394.98	-0.287264	0.140068	-2.05088	0.0402784	0.299722
ENSG00000180867	1184.17	-0.286999	0.137101	-2.09334	0.0363189	0.285131
ENSG00000173548	442.824	-0.28694	0.16216	-1.76949	0.0768123	0.403736
ENSG00000001084	613.16	-0.286921	0.149075	-1.92468	0.0542699	0.347956
ENSG00000119865	39.9193	-0.286757	0.232929	-1.23109	0.218288	0.606435
ENSG00000135801	393.773	-0.286756	0.166897	-1.71816	0.0857667	0.422421
ENSG00000198435	248.796	-0.286521	0.178241	-1.60749	0.107947	0.461717
ENSG00000067064	997.969	-0.286498	0.160883	-1.78078	0.0749482	0.398593
ENSG00000111737	507.393	-0.286429	0.157941	-1.81352	0.0697517	0.386866
ENSG00000198246	136.423	-0.286378	0.202077	-1.41717	0.156432	0.535381
ENSG00000182973	512.994	-0.286219	0.164396	-1.74103	0.0816788	0.414399
ENSG00000008394	3205.85	-0.286157	0.134286	-2.13096	0.0330924	0.274934
ENSG00000170873	56.3247	-0.286146	0.229945	-1.24441	0.213348	0.603608
ENSG00000189164	56.3276	-0.285957	0.230364	-1.24133	0.214485	0.604012
ENSG00000171155	177.301	-0.285956	0.192521	-1.48532	0.137458	0.507681
ENSG00000113248	81.2547	-0.28593	0.2225	-1.28508	0.198764	0.587626
ENSG00000159618	135.807	-0.285863	0.204527	-1.39768	0.16221	0.540952
ENSG00000125912	929.734	-0.285655	0.133426	-2.14092	0.0322804	0.272958
ENSG00000168283	43.868	-0.285548	0.232708	-1.22706	0.219799	0.60847
ENSG00000114861	154.188	-0.285418	0.203277	-1.40408	0.160295	0.539519
ENSG00000060749	2410.95	-0.28541	0.117864	-2.42152	0.0154559	0.190682
ENSG00000135776	136.783	-0.285385	0.203709	-1.40094	0.161231	0.539519
ENSG00000078549	317.119	-0.285368	0.170553	-1.67319	0.09429	0.437496
ENSG00000241553	731.123	-0.285265	0.143693	-1.98524	0.0471183	0.324159
ENSG00000158435	780.626	-0.285131	0.151751	-1.87894	0.0602531	0.364402
ENSG00000198121	29.7073	-0.284995	0.229597	-1.24128	0.214501	0.604012
ENSG00000005889	222.475	-0.284983	0.182107	-1.56491	0.117603	0.4756
ENSG00000105607	445.85	-0.284904	0.156011	-1.82618	0.0678234	0.382995
ENSG00000158373	25.7333	-0.284738	0.226553	-1.25683	0.208816	0.598121
ENSG00000160392	134.153	-0.284522	0.209074	-1.36086	0.173556	0.557082
ENSG00000005059	147.095	-0.284511	0.203111	-1.40076	0.161285	0.539519
ENSG00000101158	629.196	-0.284302	0.151431	-1.87743	0.0604595	0.365204
ENSG00000147121	62.5432	-0.284298	0.23097	-1.23089	0.218366	0.606435
ENSG00000136271	598.798	-0.284231	0.160757	-1.76808	0.0770472	0.404233
ENSG00000136237	151.424	-0.284225	0.198784	-1.42982	0.15277	0.53013
ENSG00000188997	28.6776	-0.284155	0.229028	-1.2407	0.214717	0.604012
ENSG00000112118	5750.88	-0.284108	0.120719	-2.35346	0.0185996	0.208756
ENSG00000124541	546.965	-0.28409	0.232734	-1.22066	0.222213	0.610515
ENSG00000234545	96.6326	-0.28403	0.218291	-1.30115	0.193208	0.583254
ENSG00000136718	714.772	-0.2839	0.145963	-1.945	0.0517744	0.340459
ENSG00000104524	94.6958	-0.283821	0.220149	-1.28922	0.197321	0.586434
ENSG00000267040	12.0989	-0.283782	0.197641	-1.43585	0.151046	NA
ENSG00000196268	209.236	-0.28372	0.186197	-1.52376	0.127568	0.490154
ENSG00000121060	470.48	-0.28369	0.15201	-1.86625	0.0620059	0.368757
ENSG00000008277	328.846	-0.283493	0.164938	-1.71879	0.0856529	0.42205
ENSG00000112210	226.338	-0.283477	0.188141	-1.50673	0.13188	0.498471
ENSG00000104980	655.056	-0.283373	0.156117	-1.81513	0.0695036	0.386866
ENSG00000111196	200.778	-0.283313	0.199124	-1.4228	0.154795	0.53394
ENSG00000186603	186.649	-0.283311	0.195462	-1.44945	0.147213	0.522903
ENSG00000113013	6290.24	-0.283296	0.130045	-2.17845	0.0293726	0.260198
ENSG00000140750	524.3	-0.283236	0.148209	-1.91105	0.0559979	0.352002
ENSG00000176024	116.884	-0.283218	0.212004	-1.33591	0.18158	0.565443
ENSG00000103381	140.062	-0.283211	0.208919	-1.3556	0.175225	0.558927
ENSG00000203952	32.3556	-0.283165	0.231647	-1.2224	0.221556	0.610428
ENSG00000133739	199.494	-0.283154	0.18596	-1.52266	0.127844	0.49029
ENSG00000163376	286.258	-0.283028	0.186039	-1.52134	0.128174	0.490953
ENSG00000144445	203.661	-0.282851	0.184642	-1.53189	0.12555	0.487318
ENSG00000183837	79.665	-0.282764	0.223137	-1.26722	0.205076	0.594479
ENSG00000152932	266.87	-0.282723	0.174974	-1.6158	0.106138	0.458579
ENSG00000151465	1274.27	-0.282635	0.139214	-2.03022	0.0423345	0.306506
ENSG00000166788	516.17	-0.282632	0.161549	-1.74951	0.0802026	0.410479
ENSG00000165416	782.294	-0.282569	0.151787	-1.86161	0.0626581	0.370157
ENSG00000262879	38.9502	-0.282467	0.232737	-1.21367	0.224873	0.613806
ENSG00000166780	263.073	-0.282437	0.182813	-1.54495	0.122358	0.482183
ENSG00000118363	142.88	-0.282416	0.201568	-1.4011	0.161185	0.539519
ENSG00000230667	76.7542	-0.282411	0.224072	-1.26036	0.20754	0.596775
ENSG00000115053	16609.9	-0.28241	0.120709	-2.3396	0.0193046	0.211746
ENSG00000198920	278.77	-0.2824	0.175634	-1.60789	0.10786	0.461717
ENSG00000136802	1724.8	-0.282291	0.130653	-2.16063	0.0307243	0.264977
ENSG00000151503	837.257	-0.282285	0.144424	-1.95456	0.0506353	0.336424
ENSG00000173418	275.59	-0.28216	0.172044	-1.64004	0.100996	0.448733
ENSG00000139083	228.342	-0.282135	0.184012	-1.53325	0.125215	0.487158
ENSG00000196812	50.2723	-0.282108	0.232695	-1.21235	0.225378	0.613806
ENSG00000052749	716.061	-0.282005	0.153009	-1.84307	0.0653192	0.376657
ENSG00000135476	769.216	-0.281953	0.142473	-1.97899	0.0478167	0.327172
ENSG00000187792	33.5138	-0.281911	0.232132	-1.21444	0.224578	0.613729
ENSG00000093009	289.11	-0.281883	0.17977	-1.56802	0.116877	0.474159
ENSG00000174744	345.545	-0.281871	0.177014	-1.59237	0.111302	0.468079
ENSG00000154229	342.439	-0.281857	0.16301	-1.72908	0.083795	0.419498
ENSG00000214018	18.7324	-0.281802	0.217782	-1.29396	0.195678	NA
ENSG00000148110	643.618	-0.281782	0.161222	-1.74778	0.0805013	0.411351
ENSG00000183161	330.255	-0.281773	0.168625	-1.671	0.094722	0.437758
ENSG00000177706	239.26	-0.281771	0.177556	-1.58694	0.112526	0.468786
ENSG00000167985	72.0374	-0.28174	0.22616	-1.24576	0.212854	0.602977
ENSG00000123297	245.79	-0.281707	0.180432	-1.56129	0.118455	0.47709
ENSG00000197345	365.367	-0.281702	0.164157	-1.71605	0.0861535	0.423217
ENSG00000168872	669.332	-0.281518	0.147563	-1.90778	0.0564195	0.353269
ENSG00000214367	169.944	-0.281507	0.203647	-1.38233	0.166872	0.547981
ENSG00000272821	11.3346	-0.281487	0.195742	-1.43805	0.150419	NA
ENSG00000120533	943.069	-0.281424	0.148025	-1.90119	0.0572774	0.356553
ENSG00000118420	136.006	-0.281265	0.205828	-1.36651	0.17178	0.55443
ENSG00000215319	19.0606	-0.281253	0.21437	-1.312	0.189521	NA
ENSG00000250461	14.4348	-0.281072	0.204852	-1.37208	0.170039	NA
ENSG00000159063	644.733	-0.281063	0.151999	-1.84911	0.0644415	0.374116
ENSG00000160584	452.793	-0.280955	0.158677	-1.77061	0.0766254	0.403596
ENSG00000185909	112.669	-0.280889	0.210679	-1.33326	0.182447	0.566729
ENSG00000175470	324.059	-0.280798	0.172991	-1.6232	0.104547	0.456451
ENSG00000102753	1381.32	-0.280765	0.13554	-2.07146	0.0383163	0.291981
ENSG00000116133	7142.33	-0.280726	0.134123	-2.09304	0.0363453	0.285164
ENSG00000108671	2422.58	-0.280688	0.135087	-2.07783	0.0377249	0.289493
ENSG00000122873	270.045	-0.280608	0.174637	-1.60681	0.108097	0.462048
ENSG00000100109	256.038	-0.2806	0.179814	-1.5605	0.118641	0.477284
ENSG00000134897	57.2476	-0.280544	0.229597	-1.2219	0.221746	0.610473
ENSG00000136367	317.453	-0.280515	0.182647	-1.53583	0.12458	0.485755
ENSG00000215301	5227.02	-0.280356	0.129549	-2.1641	0.030457	0.263752
ENSG00000250312	160.888	-0.280347	0.194502	-1.44136	0.149483	0.525651
ENSG00000105699	1257.63	-0.280326	0.129876	-2.15842	0.0308953	0.265218
ENSG00000140396	676.268	-0.280213	0.143302	-1.9554	0.0505362	0.336279
ENSG00000136108	1097.85	-0.280206	0.1394	-2.01009	0.0444221	0.314334
ENSG00000179542	111.012	-0.279954	0.210977	-1.32694	0.184528	0.570147
ENSG00000149792	727.84	-0.279882	0.162037	-1.72727	0.084119	0.419657
ENSG00000031823	776.229	-0.27958	0.142943	-1.95589	0.0504778	0.336279
ENSG00000204977	424.282	-0.279515	0.165135	-1.69264	0.090524	0.430367
ENSG00000257267	285.986	-0.27941	0.181176	-1.5422	0.123024	0.483211
ENSG00000161326	245.592	-0.279362	0.182534	-1.53047	0.125901	0.487898
ENSG00000168397	573.073	-0.27936	0.149731	-1.86575	0.0620769	0.368757
ENSG00000100350	440.106	-0.279355	0.157944	-1.7687	0.0769441	0.403949
ENSG00000172171	101.035	-0.2793	0.217269	-1.2855	0.198616	0.587584
ENSG00000126003	555.428	-0.279253	0.149192	-1.87177	0.0612384	0.367014
ENSG00000170571	670.496	-0.279245	0.151796	-1.83961	0.0658262	0.377133
ENSG00000126524	232.046	-0.279209	0.18123	-1.54063	0.123406	0.483835
ENSG00000163812	763.587	-0.279184	0.152601	-1.8295	0.0673241	0.382393
ENSG00000144229	15.904	-0.279138	0.211024	-1.32278	0.185909	NA
ENSG00000100519	695.048	-0.279131	0.156429	-1.7844	0.0743594	0.397291
ENSG00000107021	407.26	-0.279127	0.157714	-1.76982	0.0767565	0.403736
ENSG00000078596	255.075	-0.279064	0.178308	-1.56506	0.117568	0.4756
ENSG00000122035	16.5737	-0.27905	0.211013	-1.32243	0.186025	NA
ENSG00000140538	33.9611	-0.278977	0.232287	-1.201	0.229752	0.61774
ENSG00000141232	169.271	-0.278941	0.196502	-1.41953	0.155744	0.534844
ENSG00000135956	413.728	-0.278836	0.167874	-1.66099	0.0967158	0.440541
ENSG00000178537	45.8831	-0.278832	0.232632	-1.19859	0.230686	0.618668
ENSG00000154124	319.132	-0.278563	0.168929	-1.64899	0.09915	0.446714
ENSG00000121022	439.367	-0.278281	0.15774	-1.76418	0.0777023	0.405277
ENSG00000164176	647.264	-0.278181	0.155482	-1.78915	0.0735903	0.396227
ENSG00000126804	351.085	-0.27797	0.167289	-1.66162	0.0965891	0.440541
ENSG00000120705	2481.92	-0.277941	0.133401	-2.08349	0.0372066	0.287431
ENSG00000149948	3569.96	-0.277908	0.127635	-2.17737	0.0294527	0.260431
ENSG00000172888	201.769	-0.27751	0.186401	-1.48878	0.136545	0.506871
ENSG00000117751	599.551	-0.277474	0.147306	-1.88366	0.0596109	0.362701
ENSG00000109576	95.7035	-0.277466	0.215602	-1.28693	0.198118	0.587307
ENSG00000124207	5395.67	-0.277369	0.128401	-2.16018	0.0307584	0.264977
ENSG00000124399	87.0563	-0.277235	0.218911	-1.26643	0.205361	0.594881
ENSG00000083457	140.188	-0.27717	0.20403	-1.35848	0.174312	0.557835
ENSG00000239521	24.2181	-0.277105	0.221477	-1.25117	0.210874	NA
ENSG00000162972	210.013	-0.277033	0.184343	-1.50281	0.132887	0.499045
ENSG00000029993	3524	-0.276874	0.12287	-2.25339	0.0242344	0.240211
ENSG00000158483	88.728	-0.276806	0.219996	-1.25823	0.208309	0.597911
ENSG00000034152	346.816	-0.276658	0.16726	-1.65406	0.0981159	0.444516
ENSG00000223559	142.695	-0.276634	0.208269	-1.32825	0.184095	0.569545
ENSG00000118961	344.204	-0.276518	0.171925	-1.60837	0.107755	0.461713
ENSG00000188807	288.316	-0.276505	0.170721	-1.61963	0.105312	0.456839
ENSG00000172164	263.978	-0.276493	0.180283	-1.53366	0.125113	0.487158
ENSG00000160714	766.961	-0.276458	0.146115	-1.89205	0.0584837	0.359553
ENSG00000105784	7.88417	-0.27624	0.174043	-1.58719	0.112468	NA
ENSG00000130713	621.831	-0.276193	0.152723	-1.80846	0.0705353	0.387209
ENSG00000164902	524.042	-0.276052	0.162531	-1.69846	0.0894215	0.428612
ENSG00000237828	50.8727	-0.275855	0.231593	-1.19112	0.233606	0.62187
ENSG00000180957	264.424	-0.275799	0.173292	-1.59153	0.11149	0.468329
ENSG00000217165	25.9272	-0.275798	0.228042	-1.20942	0.226502	0.615059
ENSG00000146859	93.4704	-0.275768	0.216852	-1.27168	0.203486	0.5925
ENSG00000122085	228.018	-0.275341	0.184761	-1.49025	0.136157	0.506437
ENSG00000118242	150.824	-0.275188	0.202452	-1.35928	0.174059	0.557578
ENSG00000175581	230.936	-0.275128	0.183939	-1.49576	0.134717	0.503707
ENSG00000079215	231.032	-0.27502	0.22657	-1.21384	0.224809	0.613806
ENSG00000227105	138.672	-0.275013	0.20774	-1.32383	0.18556	0.570843
ENSG00000130032	65.6176	-0.274913	0.227044	-1.21084	0.225958	0.614492
ENSG00000166770	110.13	-0.274639	0.213871	-1.28413	0.199095	0.587801
ENSG00000168014	403.257	-0.274478	0.159498	-1.72089	0.085271	0.421263
ENSG00000048405	45.8176	-0.274355	0.232942	-1.17778	0.238883	0.627699
ENSG00000010610	63.6331	-0.274214	0.230906	-1.18756	0.235008	0.623771
ENSG00000261094	12.4293	-0.274095	0.198687	-1.37953	0.167731	NA
ENSG00000173698	196.286	-0.274082	0.188263	-1.45584	0.145436	0.520441
ENSG00000146834	584.633	-0.273996	0.14951	-1.83262	0.0668587	0.380745
ENSG00000164749	21.4045	-0.273955	0.222183	-1.23302	0.217569	NA
ENSG00000204262	432.278	-0.273911	0.163296	-1.67739	0.0934663	0.436031
ENSG00000106305	262.091	-0.273809	0.173717	-1.57618	0.114985	0.470949
ENSG00000141510	1823.07	-0.273795	0.134569	-2.03461	0.0418903	0.304648
ENSG00000081721	178.385	-0.273744	0.190348	-1.43813	0.150398	0.526027
ENSG00000010244	2655.78	-0.273679	0.136754	-2.00125	0.0453651	0.317853
ENSG00000168246	618.592	-0.273675	0.15254	-1.79411	0.0727954	0.393937
ENSG00000003249	637.013	-0.273367	0.145175	-1.88301	0.0596986	0.362701
ENSG00000188419	300.119	-0.273285	0.170635	-1.60158	0.109249	0.464632
ENSG00000166166	170.327	-0.273279	0.193846	-1.40978	0.158606	0.538609
ENSG00000153721	99.9803	-0.273231	0.217384	-1.2569	0.208789	0.598121
ENSG00000080815	703.637	-0.273192	0.140337	-1.94669	0.0515718	0.339823
ENSG00000115353	15.8531	-0.273084	0.20926	-1.305	0.191893	NA
ENSG00000082153	1262.47	-0.273071	0.160144	-1.70517	0.0881636	0.42624
ENSG00000103647	43.9407	-0.272817	0.23276	-1.17209	0.241159	0.630965
ENSG00000121864	350.281	-0.272716	0.173482	-1.57201	0.115948	0.472857
ENSG00000108590	26.5929	-0.272621	0.228376	-1.19374	0.232582	0.621056
ENSG00000128699	438.684	-0.272576	0.172759	-1.57778	0.114617	0.470931
ENSG00000165186	47.3872	-0.272553	0.232468	-1.17243	0.241024	0.630965
ENSG00000232486	11.2895	-0.27254	0.194176	-1.40357	0.160447	NA
ENSG00000041802	684.305	-0.272528	0.154825	-1.76024	0.0783673	0.407256
ENSG00000071054	2030.49	-0.272515	0.130633	-2.08612	0.0369681	0.286721
ENSG00000205572	14.6555	-0.272436	0.206311	-1.32051	0.186664	NA
ENSG00000164091	1736.83	-0.272422	0.131897	-2.06542	0.0388832	0.293591
ENSG00000125812	213.838	-0.272318	0.182581	-1.49149	0.135833	0.505891
ENSG00000122674	117.796	-0.272225	0.208598	-1.30502	0.191886	0.581044
ENSG00000114541	65.9918	-0.272182	0.228381	-1.19179	0.233343	0.621805
ENSG00000183020	546.828	-0.272155	0.146991	-1.8515	0.0640972	0.37313
ENSG00000091317	1121.54	-0.271901	0.135392	-2.00826	0.0446156	0.315529
ENSG00000135052	2085.35	-0.271881	0.122882	-2.21253	0.0269301	0.252317
ENSG00000139668	401.654	-0.271852	0.157155	-1.72983	0.0836609	0.41899
ENSG00000162631	10.1215	-0.27181	0.188696	-1.44047	0.149736	NA
ENSG00000185651	1221.27	-0.271799	0.132813	-2.04647	0.0407099	0.300756
ENSG00000142731	587.586	-0.271774	0.149754	-1.8148	0.0695547	0.386866
ENSG00000072657	27.5293	-0.27172	0.224144	-1.21226	0.225413	0.613806
ENSG00000245937	43.616	-0.271719	0.232865	-1.16685	0.24327	0.633484
ENSG00000179292	12.8387	-0.271711	0.202282	-1.34323	0.179197	NA
ENSG00000125484	1196.11	-0.271603	0.136285	-1.99291	0.0462715	0.32111
ENSG00000188060	76.6133	-0.271531	0.223294	-1.21603	0.223974	0.612694
ENSG00000184611	8.49212	-0.271334	0.177605	-1.52774	0.126578	NA
ENSG00000113758	3743.72	-0.271227	0.124577	-2.17718	0.029467	0.260431
ENSG00000169045	4969.45	-0.271036	0.138875	-1.95166	0.0509787	0.337648
ENSG00000070495	157.733	-0.271009	0.197459	-1.37248	0.169913	0.5521
ENSG00000198736	256.055	-0.271007	0.184198	-1.47128	0.141215	0.513759
ENSG00000196151	71.6077	-0.270995	0.224654	-1.20628	0.22771	0.616032
ENSG00000169683	177.108	-0.270891	0.194365	-1.39373	0.1634	0.542805
ENSG00000226792	683.953	-0.270842	0.144603	-1.873	0.0610687	0.366812
ENSG00000155085	32.6845	-0.27084	0.231333	-1.17078	0.241689	0.631453
ENSG00000168286	380.016	-0.270739	0.161447	-1.67695	0.0935517	0.436031
ENSG00000196510	680.665	-0.270724	0.148471	-1.82341	0.0682409	0.383611
ENSG00000141429	1332.04	-0.270674	0.13215	-2.04823	0.0405375	0.300427
ENSG00000072310	582.131	-0.270598	0.14898	-1.81633	0.0693194	0.386526
ENSG00000110696	2038.2	-0.270578	0.13968	-1.93713	0.0527294	0.343023
ENSG00000167272	247.631	-0.270518	0.182409	-1.48303	0.138066	0.508262
ENSG00000100084	213.006	-0.270156	0.187707	-1.43925	0.150081	0.526027
ENSG00000173599	209.713	-0.270125	0.185835	-1.45357	0.146065	0.520826
ENSG00000170365	152	-0.270112	0.198463	-1.36102	0.173507	0.557082
ENSG00000132122	125.76	-0.270109	0.211407	-1.27768	0.201364	0.590845
ENSG00000107295	96.2851	-0.270085	0.218489	-1.23615	0.216404	0.605206
ENSG00000140694	680.587	-0.270059	0.148386	-1.81997	0.0687628	0.384795
ENSG00000133895	658.558	-0.269865	0.146639	-1.84033	0.0657194	0.377133
ENSG00000241258	387.186	-0.269831	0.167031	-1.61545	0.106213	0.458579
ENSG00000064393	574.406	-0.26971	0.168107	-1.6044	0.108627	0.463387
ENSG00000165272	27.4906	-0.269583	0.22918	-1.17629	0.239478	0.628747
ENSG00000100485	175.243	-0.269466	0.193864	-1.38997	0.164537	0.543791
ENSG00000138346	984.531	-0.269458	0.14247	-1.89133	0.0585798	0.359553
ENSG00000165879	35.9563	-0.269372	0.232676	-1.15771	0.246981	0.637561
ENSG00000113319	146.665	-0.269349	0.200532	-1.34317	0.179218	0.562991
ENSG00000115267	16.3188	-0.269252	0.212357	-1.26792	0.204825	NA
ENSG00000160818	756.212	-0.269234	0.155037	-1.73658	0.0824616	0.416068
ENSG00000110218	475.775	-0.26923	0.159577	-1.68715	0.0915754	0.431537
ENSG00000273281	11.3671	-0.269178	0.191193	-1.40789	0.159165	NA
ENSG00000082269	533.804	-0.269046	0.160423	-1.67711	0.0935211	0.436031
ENSG00000172785	231.468	-0.26902	0.187051	-1.43822	0.150371	0.526027
ENSG00000064270	16.2189	-0.268874	0.211625	-1.27052	0.203898	NA
ENSG00000163249	422.318	-0.268852	0.160745	-1.67254	0.0944187	0.43753
ENSG00000134287	2398.04	-0.268843	0.12797	-2.10083	0.0356557	0.283804
ENSG00000147383	410.925	-0.268818	0.173138	-1.55262	0.120513	0.479654
ENSG00000166831	1831.15	-0.268801	0.122754	-2.18976	0.0285419	0.258177
ENSG00000136732	155.084	-0.268672	0.196414	-1.36789	0.171348	0.55401
ENSG00000234771	13.5023	-0.268607	0.193905	-1.38525	0.165975	NA
ENSG00000152495	97.8661	-0.268494	0.21601	-1.24297	0.213877	0.604012
ENSG00000125870	811.919	-0.268461	0.146079	-1.83778	0.066095	0.377878
ENSG00000185052	109.08	-0.268353	0.216263	-1.24086	0.214657	0.604012
ENSG00000134901	238.379	-0.268322	0.181966	-1.47457	0.140327	0.511592
ENSG00000125944	3607.64	-0.268286	0.125382	-2.13975	0.0323751	0.273107
ENSG00000185742	8.36113	-0.268267	0.176605	-1.51902	0.128758	NA
ENSG00000166963	78.9402	-0.268171	0.231095	-1.16044	0.245871	0.636804
ENSG00000105948	128.98	-0.268061	0.205922	-1.30176	0.192999	0.583038
ENSG00000163138	103.637	-0.268036	0.21743	-1.23275	0.21767	0.605854
ENSG00000253368	318.228	-0.268023	0.176891	-1.51518	0.129726	0.493821
ENSG00000160753	492.607	-0.268006	0.154324	-1.73664	0.0824509	0.416068
ENSG00000125485	278.068	-0.267989	0.172193	-1.55632	0.119631	0.478832
ENSG00000126777	2195.62	-0.267929	0.122982	-2.1786	0.0293612	0.260198
ENSG00000108592	1154.92	-0.267867	0.142349	-1.88176	0.0598688	0.363133
ENSG00000136045	968.912	-0.267832	0.147752	-1.81271	0.0698761	0.386866
ENSG00000214549	51.6902	-0.267713	0.231771	-1.15508	0.248059	0.638386
ENSG00000125843	28.7668	-0.267704	0.229363	-1.16716	0.243145	0.63345
ENSG00000168175	1366.25	-0.267456	0.126345	-2.11688	0.0342705	0.279924
ENSG00000198722	1094.86	-0.267424	0.130087	-2.05572	0.0398093	0.298147
ENSG00000134375	501.393	-0.267385	0.164735	-1.62312	0.104564	0.456451
ENSG00000214826	69.1099	-0.267146	0.227916	-1.17213	0.241147	0.630965
ENSG00000139372	778.887	-0.267026	0.170463	-1.56648	0.117237	0.47526
ENSG00000178971	229.672	-0.266967	0.179748	-1.48523	0.137483	0.507681
ENSG00000243232	44.5093	-0.266865	0.232702	-1.14681	0.25146	0.641827
ENSG00000115159	690.248	-0.266848	0.144883	-1.84182	0.0655021	0.376865
ENSG00000150779	446.3	-0.266767	0.164464	-1.62204	0.104796	0.456566
ENSG00000085433	80.3281	-0.266442	0.222193	-1.19915	0.230471	0.618638
ENSG00000165502	1486.86	-0.26641	0.136143	-1.95684	0.0503659	0.336279
ENSG00000163312	85.9805	-0.266281	0.220169	-1.20944	0.226496	0.615059
ENSG00000006652	518.561	-0.266184	0.232842	-1.1432	0.252958	0.643019
ENSG00000132768	693.074	-0.266174	0.154808	-1.71938	0.0855451	0.421864
ENSG00000124523	197.244	-0.266144	0.189263	-1.40621	0.159661	0.539271
ENSG00000138587	24.8297	-0.265988	0.224251	-1.18612	0.235576	NA
ENSG00000213246	507.612	-0.265977	0.157644	-1.6872	0.091565	0.431537
ENSG00000144227	25.7727	-0.265946	0.222476	-1.19539	0.231933	0.619932
ENSG00000100410	803.789	-0.265941	0.140347	-1.89489	0.0581073	0.359553
ENSG00000168556	150.206	-0.265498	0.200563	-1.32376	0.185582	0.570843
ENSG00000130348	405.103	-0.265448	0.164183	-1.61678	0.105925	0.458322
ENSG00000162408	227.322	-0.265434	0.184577	-1.43807	0.150415	0.526027
ENSG00000162607	1020.75	-0.265077	0.14276	-1.8568	0.0633403	0.371827
ENSG00000103876	174.697	-0.264975	0.192243	-1.37833	0.1681	0.549868
ENSG00000136243	223.109	-0.264938	0.191462	-1.38376	0.166433	0.547075
ENSG00000188566	203.093	-0.264927	0.184568	-1.43539	0.151177	0.527117
ENSG00000006744	1297.72	-0.264847	0.128754	-2.05699	0.0396867	0.297731
ENSG00000139618	271.471	-0.26477	0.175235	-1.51094	0.130804	0.496157
ENSG00000051180	408.175	-0.264763	0.161323	-1.64121	0.100755	0.448733
ENSG00000177679	162.842	-0.264633	0.195117	-1.35628	0.175009	0.558688
ENSG00000144369	318.768	-0.264632	0.166429	-1.59006	0.111822	0.468341
ENSG00000079785	2100.06	-0.264571	0.132009	-2.00418	0.0450504	0.316869
ENSG00000152240	858.125	-0.264565	0.149784	-1.7663	0.0773451	0.404564
ENSG00000146094	24.5817	-0.264532	0.226276	-1.16906	0.242378	NA
ENSG00000180113	9.54463	-0.264491	0.182005	-1.45321	0.146166	NA
ENSG00000103978	398.258	-0.264443	0.161964	-1.63272	0.102527	0.452669
ENSG00000162377	373.344	-0.264372	0.16651	-1.58773	0.112348	0.468786
ENSG00000162623	216.336	-0.264341	0.183164	-1.44319	0.148967	0.525632
ENSG00000121904	227.788	-0.264337	0.179417	-1.47331	0.140668	0.512377
ENSG00000110660	355.368	-0.264129	0.166687	-1.58458	0.113061	0.46908
ENSG00000121848	343.886	-0.264008	0.164167	-1.60817	0.107799	0.461713
ENSG00000103549	646.558	-0.263935	0.151854	-1.73808	0.082196	0.415381
ENSG00000131773	236.519	-0.263683	0.181869	-1.44986	0.147099	0.522746
ENSG00000175356	7.80797	-0.263641	0.172379	-1.52943	0.126159	NA
ENSG00000008952	1114.37	-0.263605	0.135007	-1.95254	0.0508744	0.337306
ENSG00000140022	134.675	-0.263562	0.203438	-1.29554	0.195133	0.585354
ENSG00000167900	688.239	-0.263537	0.14549	-1.81137	0.070083	0.387169
ENSG00000205707	42.0196	-0.26343	0.232885	-1.13116	0.257988	0.647586
ENSG00000180287	40.5001	-0.263427	0.232698	-1.13206	0.25761	0.647228
ENSG00000124406	318.131	-0.263351	0.170527	-1.54434	0.122507	0.482214
ENSG00000114405	70.1991	-0.263202	0.227872	-1.15504	0.248073	0.638386
ENSG00000042429	310.327	-0.262953	0.168372	-1.56174	0.118349	0.477088
ENSG00000136875	665.258	-0.262928	0.147233	-1.78579	0.0741334	0.397288
ENSG00000111328	923.026	-0.26285	0.149785	-1.75484	0.0792859	0.40872
ENSG00000146197	22.2879	-0.262721	0.224327	-1.17115	0.241537	NA
ENSG00000196177	298.373	-0.262635	0.180222	-1.45728	0.145038	0.519828
ENSG00000102384	233.722	-0.262601	0.187992	-1.39687	0.162452	0.541057
ENSG00000198492	1709.1	-0.262505	0.136827	-1.91852	0.0550454	0.350112
ENSG00000230733	122.303	-0.262332	0.208268	-1.25959	0.207818	0.59715
ENSG00000065675	265.703	-0.262292	0.174468	-1.50338	0.13274	0.499045
ENSG00000132382	1566.89	-0.262247	0.133878	-1.95885	0.0501299	0.336279
ENSG00000197959	27.3271	-0.262213	0.22891	-1.14549	0.252008	0.642168
ENSG00000187257	322.927	-0.262105	0.171078	-1.53208	0.125503	0.487318
ENSG00000212916	29.0073	-0.261963	0.230374	-1.13712	0.255489	0.645041
ENSG00000100626	82.9284	-0.261775	0.222134	-1.17845	0.238616	0.627423
ENSG00000253276	102.118	-0.261744	0.213681	-1.22493	0.220602	0.609211
ENSG00000119004	118.868	-0.261698	0.207551	-1.26088	0.207351	0.596762
ENSG00000051128	115.049	-0.261509	0.209036	-1.25102	0.210928	0.600663
ENSG00000198690	336.995	-0.261319	0.164696	-1.58667	0.112587	0.468786
ENSG00000179059	2795.56	-0.261299	0.128543	-2.03278	0.0420749	0.305471
ENSG00000151883	301.418	-0.261279	0.179691	-1.45404	0.145934	0.520771
ENSG00000213988	437.232	-0.261247	0.154017	-1.69622	0.0898449	0.429675
ENSG00000178078	75.76	-0.261172	0.223189	-1.17018	0.241927	0.631945
ENSG00000076351	28.2645	-0.261114	0.228593	-1.14227	0.253343	0.643559
ENSG00000258441	122.446	-0.261051	0.213631	-1.22197	0.221717	0.610473
ENSG00000065308	438.957	-0.260988	0.159111	-1.64029	0.100944	0.448733
ENSG00000132357	8.74782	-0.260727	0.180303	-1.44605	0.148163	NA
ENSG00000072315	22.4796	-0.260708	0.223138	-1.16837	0.242659	NA
ENSG00000234036	60.8298	-0.260587	0.229363	-1.13614	0.255899	0.645329
ENSG00000213222	77.274	-0.260517	0.222489	-1.17092	0.241631	0.631453
ENSG00000179115	878.478	-0.260496	0.144953	-1.79711	0.0723179	0.392572
ENSG00000268295	15.2718	-0.260234	0.204882	-1.27016	0.204026	NA
ENSG00000178150	141.434	-0.260167	0.203888	-1.27603	0.201944	0.591028
ENSG00000004766	137.157	-0.260102	0.204686	-1.27073	0.203824	0.593242
ENSG00000161981	407.942	-0.26003	0.167337	-1.55393	0.120201	0.47946
ENSG00000074582	142.117	-0.26	0.202135	-1.28627	0.198349	0.587494
ENSG00000157796	167.98	-0.259846	0.194124	-1.33856	0.180714	0.564299
ENSG00000231878	80.5682	-0.259823	0.222478	-1.16786	0.242863	0.63323
ENSG00000125351	421.383	-0.259752	0.159996	-1.62349	0.104484	0.456451
ENSG00000134873	256.231	-0.259703	0.175334	-1.48119	0.138557	0.508582
ENSG00000042286	63.1612	-0.259695	0.227733	-1.14035	0.254141	0.644312
ENSG00000224531	192	-0.259676	0.190984	-1.35967	0.173933	0.557315
ENSG00000272655	10.3408	-0.259594	0.190923	-1.35968	0.173932	NA
ENSG00000250899	347.035	-0.259451	0.167533	-1.54865	0.121466	0.481362
ENSG00000102158	892.807	-0.25919	0.15089	-1.71774	0.0858441	0.422421
ENSG00000109586	1213.82	-0.259169	0.140066	-1.85034	0.0642647	0.373766
ENSG00000161057	1157.43	-0.259127	0.155005	-1.67173	0.0945782	0.437758
ENSG00000104853	787.725	-0.258916	0.142828	-1.81279	0.0698647	0.386866
ENSG00000136546	6.47108	-0.25891	0.162936	-1.58903	0.112053	NA
ENSG00000213971	46.2559	-0.25887	0.232824	-1.11187	0.266195	0.653948
ENSG00000188112	741.327	-0.258766	0.149759	-1.72789	0.0840084	0.419657
ENSG00000153827	1806.37	-0.258659	0.121444	-2.12986	0.0331831	0.275071
ENSG00000138030	58.1815	-0.258635	0.230703	-1.12108	0.262255	0.651245
ENSG00000185477	36.2036	-0.258539	0.232706	-1.11101	0.266564	0.654432
ENSG00000253919	27.8321	-0.258483	0.229279	-1.12737	0.259585	0.649475
ENSG00000134986	2897.11	-0.258279	0.136815	-1.8878	0.0590533	0.361003
ENSG00000182173	307.227	-0.258228	0.169359	-1.52474	0.127325	0.490057
ENSG00000197586	342.037	-0.258193	0.16296	-1.58439	0.113104	0.46908
ENSG00000101247	132.942	-0.258192	0.205338	-1.2574	0.208609	0.598121
ENSG00000034533	30.6931	-0.258064	0.230051	-1.12177	0.26196	0.651146
ENSG00000261424	120.877	-0.258039	0.20948	-1.23181	0.218021	0.606266
ENSG00000066629	263.225	-0.257972	0.185883	-1.38782	0.165192	0.544982
ENSG00000046653	1627.73	-0.257834	0.131813	-1.95606	0.0504575	0.336279
ENSG00000171956	12.6106	-0.257831	0.200396	-1.28661	0.198232	NA
ENSG00000146143	598.661	-0.257767	0.15695	-1.64235	0.100518	0.448733
ENSG00000264456	6.35268	-0.257689	0.163295	-1.57806	0.114552	NA
ENSG00000149428	3471.44	-0.257636	0.125525	-2.05246	0.0401247	0.299094
ENSG00000126698	1097.25	-0.257623	0.155535	-1.65636	0.0976488	0.443061
ENSG00000260482	81.2071	-0.25754	0.221076	-1.16494	0.244042	0.6345
ENSG00000176406	204.049	-0.257429	0.184455	-1.39562	0.162829	0.541469
ENSG00000124228	789.677	-0.257419	0.138883	-1.85349	0.0638121	0.372638
ENSG00000236287	549.186	-0.257263	0.156182	-1.64721	0.0995158	0.446818
ENSG00000173409	182.578	-0.257261	0.194876	-1.32012	0.186793	0.573109
ENSG00000259969	16.5099	-0.257254	0.213012	-1.2077	0.227164	NA
ENSG00000167291	2089.22	-0.257188	0.12548	-2.04964	0.0403997	0.299925
ENSG00000257167	69.2911	-0.257034	0.227308	-1.13077	0.25815	0.647586
ENSG00000215193	624.269	-0.256982	0.146767	-1.75095	0.0799537	0.410185
ENSG00000085733	1711.29	-0.256968	0.134373	-1.91234	0.0558329	0.351893
ENSG00000009954	1808.2	-0.256927	0.122493	-2.09748	0.0359508	0.283804
ENSG00000196998	62.7446	-0.256862	0.229652	-1.11848	0.263361	0.652096
ENSG00000143297	12.2715	-0.256851	0.19689	-1.30454	0.19205	NA
ENSG00000100478	51.6127	-0.256812	0.232724	-1.10351	0.269807	0.657033
ENSG00000168077	115.429	-0.256762	0.209634	-1.22481	0.220647	0.609211
ENSG00000104313	17.0446	-0.256747	0.215008	-1.19413	0.232427	NA
ENSG00000186767	243.595	-0.256653	0.177246	-1.448	0.147616	0.523281
ENSG00000129696	206.116	-0.256553	0.186882	-1.37281	0.169812	0.5521
ENSG00000117133	477.547	-0.25655	0.163545	-1.56868	0.116722	0.473678
ENSG00000152661	13539.5	-0.256404	0.111764	-2.29416	0.0217811	0.225168
ENSG00000153006	573.086	-0.256348	0.155619	-1.64728	0.0995013	0.446818
ENSG00000166263	153.467	-0.256159	0.210739	-1.21552	0.224166	0.612864
ENSG00000108389	499.172	-0.256157	0.150467	-1.70241	0.0886791	0.427766
ENSG00000040487	138.263	-0.256126	0.20087	-1.27508	0.20228	0.591132
ENSG00000169740	160.87	-0.256095	0.194808	-1.31461	0.188642	0.575703
ENSG00000123473	533.25	-0.256085	0.157933	-1.62148	0.104914	0.456566
ENSG00000235036	14.5695	-0.255981	0.205087	-1.24816	0.211972	NA
ENSG00000070010	409.902	-0.255944	0.168196	-1.5217	0.128084	0.490772
ENSG00000132953	1116.29	-0.255909	0.130793	-1.9566	0.0503943	0.336279
ENSG00000103194	1804.6	-0.255833	0.131298	-1.94849	0.0513562	0.339623
ENSG00000093000	1186.89	-0.255762	0.139756	-1.83006	0.0672411	0.382384
ENSG00000126106	56.0424	-0.25576	0.230532	-1.10943	0.267244	0.655067
ENSG00000116752	567.894	-0.255713	0.162213	-1.5764	0.114933	0.470949
ENSG00000166135	895.142	-0.25554	0.133849	-1.90917	0.0562399	0.35266
ENSG00000168564	200.019	-0.255514	0.190819	-1.33904	0.180557	0.564299
ENSG00000164144	506.227	-0.255418	0.158892	-1.6075	0.107945	0.461717
ENSG00000154832	500.361	-0.255417	0.149296	-1.7108	0.0871174	0.425265
ENSG00000234297	153.912	-0.255379	0.197793	-1.29115	0.196653	0.586211
ENSG00000130775	125.203	-0.255347	0.207339	-1.23155	0.218118	0.606403
ENSG00000128594	192.585	-0.255219	0.193248	-1.32068	0.186609	0.573109
ENSG00000102098	441.068	-0.25513	0.15739	-1.62101	0.105017	0.456566
ENSG00000107669	407.333	-0.255067	0.157866	-1.61572	0.106155	0.458579
ENSG00000150456	31.1686	-0.254827	0.230437	-1.10584	0.268795	0.656066
ENSG00000157399	17.0727	-0.254815	0.21489	-1.1858	0.235703	NA
ENSG00000234664	377.042	-0.254797	0.163619	-1.55725	0.11941	0.478685
ENSG00000011007	759.19	-0.254734	0.148995	-1.70968	0.0873248	0.425265
ENSG00000108561	2942.36	-0.254656	0.133246	-1.91117	0.0559831	0.352002
ENSG00000106299	754.953	-0.254589	0.144195	-1.76558	0.0774662	0.404656
ENSG00000119866	188.842	-0.254528	0.199379	-1.2766	0.201743	0.590956
ENSG00000169126	69.4363	-0.254399	0.229411	-1.10892	0.267464	0.655067
ENSG00000149054	167.648	-0.254397	0.194241	-1.30969	0.190299	0.579109
ENSG00000012963	525.553	-0.254236	0.155673	-1.63314	0.102439	0.452669
ENSG00000018510	1012.58	-0.254201	0.132948	-1.91203	0.0558728	0.351906
ENSG00000138668	6645.21	-0.254157	0.11495	-2.21102	0.0270343	0.252429
ENSG00000096070	563.846	-0.254114	0.15414	-1.64859	0.0992313	0.446818
ENSG00000163866	303.743	-0.254097	0.168955	-1.50394	0.132598	0.498836
ENSG00000204959	92.1406	-0.254036	0.216908	-1.17117	0.24153	0.631421
ENSG00000196290	608.466	-0.254024	0.156888	-1.61914	0.105416	0.457137
ENSG00000078018	179.248	-0.253998	0.20607	-1.23258	0.217732	0.605854
ENSG00000154310	1342.45	-0.253968	0.135558	-1.8735	0.0609997	0.36657
ENSG00000188215	125.454	-0.253929	0.214286	-1.185	0.236016	0.625025
ENSG00000144218	31.7595	-0.253922	0.231089	-1.09881	0.271853	0.659064
ENSG00000112983	693.567	-0.253819	0.155649	-1.63071	0.102951	0.453336
ENSG00000197702	158.815	-0.253707	0.195455	-1.29803	0.194277	0.58421
ENSG00000136051	797.154	-0.253627	0.142703	-1.77731	0.0755178	0.400225
ENSG00000168496	1095.91	-0.253605	0.144853	-1.75077	0.0799854	0.410185
ENSG00000186283	313.673	-0.253552	0.171426	-1.47907	0.139121	0.509925
ENSG00000113575	2261.69	-0.253339	0.128913	-1.9652	0.049391	0.3335
ENSG00000133816	30.6324	-0.253307	0.229872	-1.10195	0.270484	0.657563
ENSG00000086475	8338.02	-0.253256	0.120606	-2.09986	0.0357415	0.283804
ENSG00000165792	522.921	-0.253122	0.152256	-1.66248	0.0964173	0.440533
ENSG00000161671	595.46	-0.253098	0.143981	-1.75785	0.0787722	0.407874
ENSG00000113552	1293.7	-0.253093	0.127449	-1.98585	0.0470503	0.324159
ENSG00000172336	386.839	-0.25304	0.173764	-1.45623	0.145329	0.520348
ENSG00000102580	384.218	-0.252971	0.163371	-1.54844	0.121516	0.481414
ENSG00000184967	265.874	-0.252961	0.173393	-1.45889	0.144596	0.519171
ENSG00000196730	1925.55	-0.252917	0.122089	-2.07157	0.0383056	0.291981
ENSG00000160785	342.876	-0.252911	0.174263	-1.45132	0.14669	0.522451
ENSG00000164411	10.4534	-0.252858	0.187033	-1.35194	0.176394	NA
ENSG00000056736	59.5996	-0.25283	0.229386	-1.1022	0.270374	0.657547
ENSG00000158169	172.978	-0.252796	0.193777	-1.30457	0.192039	0.581097
ENSG00000162851	224.886	-0.252777	0.184841	-1.36754	0.171456	0.554082
ENSG00000259673	6.84371	-0.252688	0.167768	-1.50618	0.132022	NA
ENSG00000154721	143.324	-0.252611	0.200568	-1.25948	0.207858	0.59715
ENSG00000115233	1347.34	-0.252572	0.149215	-1.69267	0.0905185	0.430367
ENSG00000132361	831.625	-0.252345	0.137269	-1.83833	0.0660139	0.377609
ENSG00000183048	44.5441	-0.252183	0.232722	-1.08362	0.278532	0.666046
ENSG00000184220	497.516	-0.252095	0.156862	-1.60711	0.108029	0.461914
ENSG00000162946	21.6985	-0.252042	0.219916	-1.14608	0.251761	NA
ENSG00000198744	63.023	-0.251996	0.229437	-1.09832	0.272063	0.659064
ENSG00000124357	193.903	-0.251801	0.189083	-1.3317	0.18296	0.567264
ENSG00000152402	15.3686	-0.251799	0.210125	-1.19833	0.230788	NA
ENSG00000134452	447.3	-0.251715	0.15362	-1.63855	0.101307	0.449959
ENSG00000112290	663.547	-0.251658	0.148463	-1.69509	0.0900592	0.429922
ENSG00000143252	465.812	-0.251521	0.154815	-1.62466	0.104236	0.456451
ENSG00000147439	77.3763	-0.251308	0.223192	-1.12597	0.260177	0.649475
ENSG00000115504	589.191	-0.251217	0.158272	-1.58725	0.112455	0.468786
ENSG00000233347	42.2631	-0.251191	0.232937	-1.07837	0.280871	0.66834
ENSG00000185085	320.667	-0.251111	0.173304	-1.44896	0.147348	0.522907
ENSG00000184182	135.569	-0.251089	0.203161	-1.23591	0.216492	0.605206
ENSG00000196418	124.005	-0.251047	0.211579	-1.18654	0.235409	0.62432
ENSG00000239665	42.0836	-0.25092	0.232528	-1.07909	0.280545	0.668104
ENSG00000107789	410.771	-0.250902	0.166052	-1.51099	0.130792	0.496157
ENSG00000067113	197.877	-0.250883	0.186871	-1.34254	0.179421	0.563065
ENSG00000131724	159.614	-0.250833	0.197239	-1.27172	0.203472	0.5925
ENSG00000148399	246.812	-0.250791	0.195071	-1.28564	0.198567	0.587584
ENSG00000100028	1726.53	-0.250441	0.124457	-2.01227	0.0441918	0.31409
ENSG00000177822	46.5452	-0.250409	0.232735	-1.07594	0.281956	0.669599
ENSG00000062725	255.645	-0.250321	0.176348	-1.41947	0.155761	0.534844
ENSG00000110047	348.995	-0.250217	0.169197	-1.47885	0.13918	0.509995
ENSG00000145284	17.523	-0.250177	0.214833	-1.16452	0.244215	NA
ENSG00000030066	2496.96	-0.250052	0.128613	-1.94422	0.0518687	0.340667
ENSG00000113387	1945.19	-0.25001	0.134482	-1.85905	0.0630196	0.371064
ENSG00000103005	693.867	-0.24991	0.144995	-1.72357	0.0847855	0.42052
ENSG00000075568	566.509	-0.249873	0.150653	-1.6586	0.0971972	0.441793
ENSG00000123219	356.637	-0.249867	0.177843	-1.40499	0.160025	0.539271
ENSG00000088808	89.6539	-0.249803	0.219319	-1.139	0.254704	0.644558
[truncated: 61,678 more rows]

## Sheet: MEL1 hPSC 5v20% O2
Gene ID	Base Mean	Log2(FC)	StdErr	Wald Stats	P value	Padj value
ENSG00000147596	661.297	-1.06752	0.153399	-6.95913	3.42e-12	3.44e-09
ENSG00000134363	218.224	-1.04897	0.2004	-5.2344	1.66e-07	4.4e-05
ENSG00000178343	19.7169	-0.991013	0.233691	-4.2407	2.23e-05	0.00217876
ENSG00000125968	353.253	-0.978946	0.18129	-5.39988	6.67e-08	2.04e-05
ENSG00000173673	168.97	-0.968757	0.20586	-4.70591	2.53e-06	0.000360129
ENSG00000256463	181.127	-0.968461	0.186074	-5.2047	1.94e-07	4.94e-05
ENSG00000164128	101.149	-0.944962	0.199888	-4.72745	2.27e-06	0.000333457
ENSG00000166342	132.715	-0.94352	0.185321	-5.09129	3.56e-07	7.47e-05
ENSG00000177511	119.636	-0.934614	0.179646	-5.20254	1.97e-07	4.94e-05
ENSG00000080709	185.769	-0.881277	0.171623	-5.13495	2.82e-07	6.31e-05
ENSG00000177519	71.9906	-0.878352	0.215566	-4.07463	4.61e-05	0.00377274
ENSG00000101180	62.6291	-0.85788	0.207849	-4.12743	3.67e-05	0.00313042
ENSG00000104327	268.267	-0.853994	0.181392	-4.708	2.5e-06	0.000360129
ENSG00000181274	770.41	-0.837499	0.146083	-5.73303	9.87e-09	4.21e-06
ENSG00000083799	199.846	-0.81312	0.178604	-4.55264	5.3e-06	0.000665998
ENSG00000135905	18.2913	-0.795488	0.233004	-3.41405	0.000640044	0.0213045
ENSG00000043143	556.639	-0.789529	0.156765	-5.03639	4.74e-07	9.68e-05
ENSG00000183337	972.982	-0.77778	0.160022	-4.86047	1.17e-06	0.000201083
ENSG00000159917	39.9885	-0.772891	0.22872	-3.3792	0.000726977	0.023158
ENSG00000081803	269.957	-0.772096	0.161089	-4.79298	1.64e-06	0.000269026
ENSG00000171724	911.167	-0.766512	0.172283	-4.44915	8.62e-06	0.000955797
ENSG00000152518	862.659	-0.759207	0.166758	-4.55274	5.3e-06	0.000665998
ENSG00000171956	24.0573	-0.755393	0.232048	-3.25532	0.00113263	0.0309059
ENSG00000150594	42.5465	-0.74436	0.224306	-3.3185	0.000905008	0.0270348
ENSG00000156697	317.617	-0.743403	0.198263	-3.74957	0.000177139	0.0094474
ENSG00000181472	441.008	-0.741657	0.178562	-4.1535	3.27e-05	0.00288142
ENSG00000132434	211.799	-0.739136	0.195575	-3.7793	0.000157269	0.00875238
ENSG00000088305	16697.8	-0.737791	0.127149	-5.80257	6.53e-09	3.06e-06
ENSG00000165029	178.166	-0.732725	0.181013	-4.04791	5.17e-05	0.00409359
ENSG00000120694	2206.05	-0.73229	0.13142	-5.57215	2.52e-08	9.08e-06
ENSG00000173705	89.688	-0.732151	0.210158	-3.4838	0.000494345	0.0176942
ENSG00000189057	413.2	-0.730689	0.1823	-4.00817	6.12e-05	0.00461847
ENSG00000170542	427.569	-0.73006	0.187337	-3.89704	9.74e-05	0.00641686
ENSG00000171848	2534.56	-0.72803	0.155677	-4.67654	2.92e-06	0.000402739
ENSG00000179546	117.806	-0.726922	0.190821	-3.80945	0.000139277	0.00810339
ENSG00000206538	244.068	-0.72425	0.17202	-4.21027	2.55e-05	0.00237838
ENSG00000179041	419.688	-0.723423	0.180513	-4.0076	6.13e-05	0.00461847
ENSG00000021826	239.046	-0.721514	0.160274	-4.50175	6.74e-06	0.00079078
ENSG00000185432	216.678	-0.71829	0.206088	-3.48535	0.000491496	0.017659
ENSG00000162998	76.2015	-0.7163	0.214928	-3.33274	0.000859939	0.0260947
ENSG00000166963	95.244	-0.714745	0.224279	-3.18686	0.00143828	0.035528
ENSG00000154822	253.643	-0.713133	0.19707	-3.61867	0.000296121	0.0128685
ENSG00000132294	696.315	-0.713094	0.15411	-4.62718	3.71e-06	0.000492377
ENSG00000158966	939.11	-0.705914	0.158513	-4.45336	8.45e-06	0.000944658
ENSG00000101347	599.677	-0.703766	0.151661	-4.64039	3.48e-06	0.000466313
ENSG00000038427	5250.53	-0.700627	0.154254	-4.54202	5.57e-06	0.00068817
ENSG00000172201	83.8448	-0.700504	0.224524	-3.11995	0.00180884	0.0411445
ENSG00000083812	49.247	-0.694174	0.230361	-3.01341	0.00258326	0.0502379
ENSG00000163666	116.297	-0.689376	0.215907	-3.19292	0.0014084	0.0352402
ENSG00000181938	207.608	-0.685991	0.169596	-4.04485	5.24e-05	0.00409543
ENSG00000168646	163.613	-0.679119	0.190872	-3.55799	0.000373707	0.0147803
ENSG00000160072	382.904	-0.678601	0.183419	-3.69974	0.000215822	0.0107758
ENSG00000162650	95.0546	-0.677068	0.199631	-3.3916	0.000694864	0.0224912
ENSG00000180573	81.8356	-0.67567	0.220421	-3.06536	0.00217408	0.0453817
ENSG00000114805	355.23	-0.675065	0.158472	-4.25984	2.05e-05	0.00204238
ENSG00000176248	195.717	-0.670527	0.190393	-3.5218	0.00042862	0.0163389
ENSG00000109971	26555.2	-0.669665	0.148104	-4.52158	6.14e-06	0.000738647
ENSG00000178409	773.578	-0.668506	0.166255	-4.02097	5.8e-05	0.00445933
ENSG00000169851	78.2051	-0.665213	0.223276	-2.97933	0.00288882	0.0544555
ENSG00000085552	344.495	-0.664165	0.182629	-3.63669	0.000276167	0.0124926
ENSG00000267161	31.3529	-0.661832	0.231092	-2.86394	0.00418412	0.0671213
ENSG00000048540	123.878	-0.659977	0.203377	-3.24509	0.00117412	0.0317832
ENSG00000143028	22.831	-0.658819	0.233642	-2.81978	0.00480572	0.0727575
ENSG00000139718	337.448	-0.65678	0.190252	-3.45216	0.000556109	0.0191912
ENSG00000129173	168.458	-0.653207	0.185963	-3.51257	0.000443787	0.0165305
ENSG00000107562	433.72	-0.652952	0.141264	-4.62222	3.8e-06	0.000499592
ENSG00000155846	166.161	-0.650725	0.198277	-3.2819	0.00103112	0.0293801
ENSG00000156966	679.454	-0.65055	0.131122	-4.9614	7e-07	0.000131385
ENSG00000117597	311.681	-0.649471	0.154499	-4.20372	2.63e-05	0.00243212
ENSG00000140015	9.71388	-0.643257	0.216592	-2.9699	0.00297893	NA
ENSG00000230316	62.1789	-0.639372	0.22701	-2.81649	0.00485511	0.0732174
ENSG00000169288	240.824	-0.636617	0.181848	-3.50081	0.000463846	0.0169196
ENSG00000103249	391.571	-0.635716	0.16118	-3.94413	8.01e-05	0.00561035
ENSG00000240563	7990.29	-0.633812	0.160113	-3.95853	7.54e-05	0.00533563
ENSG00000147601	4745.27	-0.633101	0.106091	-5.96752	2.41e-09	1.23e-06
ENSG00000198000	348.003	-0.632838	0.15295	-4.13754	3.51e-05	0.00307011
ENSG00000080503	95.9686	-0.63207	0.197883	-3.19416	0.00140238	0.0352402
ENSG00000184408	125.526	-0.630124	0.171603	-3.67198	0.000240676	0.0116605
ENSG00000163704	85.4461	-0.628641	0.20489	-3.06819	0.0021536	0.0451243
ENSG00000132801	90.6548	-0.627681	0.198817	-3.15709	0.00159354	0.0380936
ENSG00000165879	41.9897	-0.626325	0.221554	-2.82696	0.00469916	0.0721844
ENSG00000162490	437.715	-0.625137	0.152994	-4.08601	4.39e-05	0.00365624
ENSG00000100413	237.31	-0.623368	0.184932	-3.3708	0.000749515	0.0236089
ENSG00000141314	148.659	-0.62128	0.203262	-3.05655	0.00223902	0.0461897
ENSG00000176204	87.5744	-0.619387	0.20367	-3.04112	0.00235697	0.0477497
ENSG00000040531	164.534	-0.619114	0.198826	-3.11385	0.00184662	0.0416259
ENSG00000099783	4645.26	-0.617286	0.154536	-3.99445	6.48e-05	0.00479017
ENSG00000196998	79.3083	-0.613215	0.202509	-3.02809	0.00246104	0.0490511
ENSG00000152193	148.783	-0.611053	0.188972	-3.23357	0.00122255	0.0325397
ENSG00000086061	2824.12	-0.607962	0.141023	-4.31108	1.62e-05	0.00174516
ENSG00000011677	143.467	-0.607627	0.175591	-3.46047	0.000539239	0.0188868
ENSG00000134508	251.251	-0.606592	0.165937	-3.65556	0.000256626	0.0119645
ENSG00000135547	103.926	-0.605645	0.19641	-3.08357	0.00204532	0.0443048
ENSG00000156925	772.157	-0.604872	0.154606	-3.91235	9.14e-05	0.00618723
ENSG00000171763	118.311	-0.602549	0.181948	-3.31166	0.000927458	0.0273193
ENSG00000124193	1984.73	-0.602504	0.168271	-3.58056	0.000342856	0.0139925
ENSG00000142149	198.434	-0.601306	0.162259	-3.70584	0.000210689	0.0106708
ENSG00000229544	40.6348	-0.600543	0.233913	-2.56738	0.0102471	0.110539
ENSG00000184012	112.799	-0.599954	0.200472	-2.99271	0.00276515	0.0526794
ENSG00000142303	51.2121	-0.599764	0.224353	-2.6733	0.00751088	0.0935868
ENSG00000174718	1231.71	-0.598683	0.12723	-4.70552	2.53e-06	0.000360129
ENSG00000163389	227.605	-0.59833	0.173598	-3.44664	0.000567606	0.0194924
ENSG00000119042	56.3257	-0.597666	0.208982	-2.85989	0.00423791	0.0673474
ENSG00000162231	568.33	-0.597295	0.153681	-3.88658	0.000101665	0.00657571
ENSG00000029363	2761.96	-0.596495	0.15832	-3.76764	0.000164795	0.00906373
ENSG00000063176	304.191	-0.596132	0.185155	-3.21964	0.00128352	0.0335622
ENSG00000057252	72.4271	-0.595907	0.224101	-2.6591	0.00783486	0.0955788
ENSG00000149970	217.128	-0.595167	0.155769	-3.82082	0.000133009	0.007902
ENSG00000204711	68.2944	-0.593861	0.21659	-2.74187	0.00610913	0.0836632
ENSG00000186275	19.7153	-0.592316	0.233488	-2.53681	0.0111866	0.116071
ENSG00000092853	406.033	-0.591543	0.156199	-3.78713	0.0001524	0.00861765
ENSG00000066382	28.4524	-0.589595	0.233087	-2.52951	0.0114223	0.117649
ENSG00000110092	1540.61	-0.588332	0.124095	-4.74098	2.13e-06	0.000322007
ENSG00000134954	600.454	-0.587717	0.184453	-3.18627	0.00144122	0.0355384
ENSG00000184481	455.468	-0.58719	0.23191	-2.53198	0.011342	0.1173
ENSG00000116704	107.141	-0.582516	0.197254	-2.95312	0.00314577	0.05664
ENSG00000176834	715.927	-0.579704	0.175303	-3.30687	0.000943446	0.0276721
ENSG00000128000	119.363	-0.579387	0.182885	-3.16804	0.00153471	0.0372564
ENSG00000100479	263.648	-0.579289	0.16618	-3.48592	0.000490441	0.017659
ENSG00000186834	462.467	-0.579062	0.170853	-3.38925	0.00070085	0.022633
ENSG00000137713	1111.67	-0.578328	0.146986	-3.93458	8.33e-05	0.00578058
ENSG00000271430	40.5737	-0.577779	0.227679	-2.53769	0.0111585	0.115984
ENSG00000100297	3242.19	-0.576666	0.159779	-3.60914	0.000307217	0.0132096
ENSG00000084073	773.537	-0.573919	0.168408	-3.40791	0.000654615	0.021687
ENSG00000139998	847.608	-0.57256	0.156255	-3.66428	0.00024804	0.0117539
ENSG00000120949	353.731	-0.571727	0.159665	-3.58078	0.000342567	0.0139925
ENSG00000185262	146.302	-0.571512	0.174601	-3.27324	0.00106322	0.0297027
ENSG00000128052	1797.69	-0.570064	0.147889	-3.85467	0.000115884	0.00718787
ENSG00000130254	359.58	-0.567376	0.188232	-3.01423	0.0025763	0.0501719
ENSG00000087269	549.068	-0.567014	0.153743	-3.68807	0.000225962	0.0110855
ENSG00000225648	120.865	-0.566044	0.21283	-2.65961	0.00782313	0.0955788
ENSG00000125843	30.1045	-0.56537	0.232173	-2.43512	0.0148869	0.135405
ENSG00000139209	166.121	-0.565056	0.174295	-3.24195	0.00118715	0.03196
ENSG00000102271	278.925	-0.56482	0.176802	-3.19465	0.0014	0.0352402
ENSG00000165632	169.416	-0.564221	0.163109	-3.45917	0.000541837	0.0189307
ENSG00000265579	26.2539	-0.564061	0.233609	-2.41455	0.0157545	0.139687
ENSG00000173698	216.165	-0.563949	0.158025	-3.56874	0.000358699	0.0143073
ENSG00000101198	41.3052	-0.563199	0.221189	-2.54623	0.0108893	0.114762
ENSG00000128594	152.679	-0.56158	0.187272	-2.99873	0.00271103	0.0522761
ENSG00000138670	20.9641	-0.559462	0.233661	-2.39434	0.0166505	0.144486
ENSG00000128191	371.048	-0.558565	0.179281	-3.11558	0.00183584	0.0414906
ENSG00000135315	120.881	-0.557638	0.188548	-2.95755	0.00310098	0.0561928
ENSG00000040633	727.306	-0.557504	0.153868	-3.62326	0.000290918	0.0128405
ENSG00000104112	700.114	-0.55603	0.150371	-3.69773	0.00021754	0.0108232
ENSG00000105447	809.717	-0.555337	0.158307	-3.50797	0.000451533	0.0166877
ENSG00000107262	401.309	-0.555306	0.178034	-3.1191	0.00181406	0.0411967
ENSG00000271524	42.8337	-0.555272	0.22416	-2.47713	0.0132444	0.125746
ENSG00000111676	1138.11	-0.555019	0.128916	-4.30529	1.67e-05	0.00176551
ENSG00000104825	269.071	-0.554706	0.181151	-3.06212	0.00219775	0.0454394
ENSG00000172315	239.177	-0.553254	0.179916	-3.07506	0.00210459	0.0446948
ENSG00000182551	552.977	-0.55319	0.172066	-3.21499	0.0013045	0.0338881
ENSG00000224773	83.7045	-0.552799	0.192853	-2.86643	0.00415133	0.067082
ENSG00000215190	17.9687	-0.552726	0.228655	-2.4173	0.0156363	0.139456
ENSG00000110104	417.755	-0.55262	0.178224	-3.10071	0.00193057	0.0426956
ENSG00000133863	250.23	-0.552065	0.157161	-3.51275	0.000443499	0.0165305
ENSG00000177707	572.641	-0.55134	0.156523	-3.52242	0.000427624	0.0163389
ENSG00000169981	178.105	-0.550564	0.173817	-3.1675	0.00153756	0.0372613
ENSG00000145794	391.882	-0.54975	0.168067	-3.27101	0.00107164	0.0298196
ENSG00000157554	43.161	-0.54838	0.229546	-2.38898	0.0168953	0.14559
ENSG00000148719	252.525	-0.547614	0.161317	-3.39464	0.000687185	0.0223712
ENSG00000198604	369.152	-0.545799	0.145718	-3.74559	0.000179972	0.00956227
ENSG00000135048	960.926	-0.544411	0.169115	-3.21918	0.0012856	0.0335622
ENSG00000110148	115.843	-0.543982	0.185162	-2.93787	0.00330475	0.0584936
ENSG00000150990	701.392	-0.543569	0.173347	-3.13572	0.0017143	0.0398307
ENSG00000115568	338.092	-0.543407	0.162457	-3.34492	0.000823075	0.0254701
ENSG00000196597	52.1945	-0.54335	0.218602	-2.48557	0.0129345	0.124237
ENSG00000226361	218.652	-0.543203	0.151699	-3.5808	0.000342541	0.0139925
ENSG00000158220	33.7684	-0.542959	0.228829	-2.37277	0.0176551	0.148585
ENSG00000270101	28.2712	-0.542076	0.231717	-2.33939	0.0193154	0.156931
ENSG00000118402	216.569	-0.541934	0.163346	-3.31769	0.000907639	0.0270348
ENSG00000144867	452.469	-0.541493	0.160564	-3.37244	0.000745057	0.0235211
ENSG00000011198	144.007	-0.540315	0.178745	-3.02282	0.00250432	0.0494541
ENSG00000167191	1542.37	-0.540154	0.107707	-5.01502	5.3e-07	0.000106663
ENSG00000135829	5361.6	-0.539265	0.150859	-3.57463	0.000350726	0.014094
ENSG00000170836	237.353	-0.538695	0.17871	-3.01435	0.00257527	0.0501719
ENSG00000152061	1311.51	-0.538502	0.110028	-4.89425	9.87e-07	0.000178135
ENSG00000083067	86.5224	-0.538087	0.211737	-2.5413	0.011044	0.115596
ENSG00000111087	179.113	-0.537593	0.174989	-3.07215	0.00212525	0.0448628
ENSG00000037897	169.831	-0.535665	0.187143	-2.86233	0.00420534	0.0671213
ENSG00000124160	479.324	-0.535455	0.233779	-2.29043	0.0219963	0.16642
ENSG00000249158	111.413	-0.53497	0.197018	-2.71533	0.00662096	0.0874338
ENSG00000185480	335.857	-0.534703	0.152046	-3.51672	0.000436909	0.0164679
ENSG00000135763	666.531	-0.534586	0.157464	-3.39497	0.000686353	0.0223712
ENSG00000125845	41.1276	-0.534148	0.231145	-2.31088	0.0208396	0.162921
ENSG00000229091	90.1129	-0.5341	0.211785	-2.52189	0.0116726	0.118944
ENSG00000145348	256.799	-0.532966	0.155364	-3.43044	0.000602607	0.0202984
ENSG00000148120	76.6813	-0.532427	0.196659	-2.70736	0.00678208	0.0885822
ENSG00000172935	59.3129	-0.53171	0.220702	-2.40918	0.0159884	0.140963
ENSG00000137078	44.6405	-0.531492	0.219703	-2.41913	0.0155576	0.13908
ENSG00000167840	295.272	-0.531156	0.162961	-3.2594	0.00111648	0.0305242
ENSG00000124201	290.623	-0.531143	0.188066	-2.82424	0.00473936	0.0722971
ENSG00000198739	11.5753	-0.530035	0.197516	-2.6835	NA	NA
ENSG00000198805	667.495	-0.529969	0.163414	-3.2431	0.00118238	0.0318925
ENSG00000171208	181.171	-0.529967	0.180847	-2.93048	0.00338439	0.0595629
ENSG00000023041	294.144	-0.529398	0.145013	-3.6507	0.000261528	0.0121447
ENSG00000198171	324.326	-0.52925	0.16494	-3.20875	0.00133312	0.0343766
ENSG00000105173	429.39	-0.528453	0.137904	-3.83203	0.000127093	0.0076854
ENSG00000102195	48.5581	-0.528248	0.229229	-2.30445	0.0211972	0.163615
ENSG00000178150	164.28	-0.52709	0.162669	-3.24025	0.00119423	0.0320893
ENSG00000116455	470.284	-0.526056	0.165288	-3.18267	0.00145926	0.0356721
ENSG00000188191	436.915	-0.52474	0.183391	-2.86131	0.00421889	0.0671213
ENSG00000136104	288.621	-0.523483	0.148899	-3.5157	0.000438597	0.0164679
ENSG00000204977	423.267	-0.522577	0.145004	-3.60389	0.000313493	0.0132878
ENSG00000123505	3152.79	-0.520754	0.157091	-3.315	0.000916446	0.0271654
ENSG00000141141	738.364	-0.520655	0.147917	-3.51992	0.000431682	0.0163389
ENSG00000093217	29.119	-0.520613	0.2322	-2.24209	0.0249558	0.177187
ENSG00000102786	412.935	-0.520257	0.145105	-3.58538	0.000336592	0.0139389
ENSG00000106144	474.484	-0.519201	0.144041	-3.60454	0.000312706	0.0132878
ENSG00000123136	794.079	-0.518555	0.15898	-3.26177	0.00110718	0.0303881
ENSG00000158055	23.8992	-0.5182	0.231837	-2.23519	0.0254047	0.178752
ENSG00000145362	402.174	-0.517996	0.168834	-3.06809	0.00215433	0.0451243
ENSG00000161048	101.72	-0.517521	0.186155	-2.78005	0.00543504	0.0786859
ENSG00000167182	180.791	-0.516831	0.163783	-3.15557	0.00160182	0.0381618
ENSG00000111490	64.4273	-0.516663	0.207274	-2.49265	0.0126792	0.12338
ENSG00000118513	60.2135	-0.516317	0.222714	-2.31829	0.0204333	0.161687
ENSG00000114126	849.986	-0.516315	0.134622	-3.83528	0.00012542	0.0076854
ENSG00000163482	335.987	-0.515984	0.155383	-3.32073	0.000897835	0.0269542
ENSG00000005339	1177.84	-0.515953	0.145654	-3.54232	0.000396628	0.0154268
ENSG00000138074	1393.9	-0.51412	0.154262	-3.33278	0.000859823	0.0260947
ENSG00000079134	459.354	-0.514059	0.158434	-3.24462	0.00117607	0.0317832
ENSG00000118007	338.479	-0.513721	0.167151	-3.07339	0.00211644	0.0448113
ENSG00000184384	66.4257	-0.513671	0.203573	-2.52327	0.0116269	0.118722
ENSG00000179021	378.302	-0.513534	0.153906	-3.33668	0.000847849	0.0260947
ENSG00000157036	88.015	-0.513188	0.203006	-2.52795	0.0114732	0.117829
ENSG00000113407	4302.12	-0.513185	0.137961	-3.71979	0.000199387	0.0103593
ENSG00000146376	92.3651	-0.511202	0.205484	-2.48779	0.0128539	0.123955
ENSG00000105204	139.08	-0.510606	0.174752	-2.92189	0.00347911	0.0598849
ENSG00000167600	2675.63	-0.510433	0.12581	-4.05716	4.97e-05	0.00404275
ENSG00000196581	58.3891	-0.510118	0.217974	-2.34027	0.01927	0.156742
ENSG00000104691	73.1961	-0.510026	0.214724	-2.37527	0.0175363	0.147982
ENSG00000076248	2594.8	-0.508703	0.122472	-4.15363	3.27e-05	0.00288142
ENSG00000204673	517.646	-0.508015	0.147136	-3.4527	0.00055501	0.0191912
ENSG00000173930	73.3479	-0.507516	0.20889	-2.42959	0.015116	0.136432
ENSG00000233461	27.1902	-0.506199	0.232992	-2.17261	0.0298098	0.192887
ENSG00000170364	210.204	-0.505795	0.187629	-2.69572	0.00702365	0.0902308
ENSG00000163481	206.142	-0.505434	0.185547	-2.72403	0.00644915	0.0861518
ENSG00000113732	545.692	-0.50509	0.15968	-3.16314	0.0015608	0.0375018
ENSG00000101868	783.879	-0.505051	0.153937	-3.28089	0.00103481	0.0293801
ENSG00000100726	396.518	-0.504758	0.173662	-2.90655	0.00365436	0.0616207
ENSG00000090674	93.0427	-0.504625	0.200304	-2.51929	0.0117592	0.119201
ENSG00000114491	587.102	-0.504485	0.155363	-3.24714	0.0011657	0.0316245
ENSG00000142408	97.8498	-0.50442	0.186578	-2.70353	0.00686078	0.08895
ENSG00000108312	1632.96	-0.504234	0.137771	-3.65995	0.000252265	0.0118777
ENSG00000197774	68.8035	-0.50328	0.217154	-2.31762	0.02047	0.161687
ENSG00000151461	825.959	-0.503065	0.133175	-3.77746	0.000158435	0.00878252
ENSG00000167716	194.215	-0.502458	0.181234	-2.77242	0.00556405	0.0792392
ENSG00000163362	336.219	-0.502205	0.159865	-3.14143	0.00168127	0.0392574
ENSG00000128973	635.062	-0.502092	0.150552	-3.335	0.000852979	0.0260947
ENSG00000186638	100.083	-0.501852	0.184263	-2.72356	0.00645834	0.0861929
ENSG00000206432	64.0024	-0.501827	0.212522	-2.36129	0.0182115	0.151221
ENSG00000122965	541.27	-0.501826	0.17451	-2.87564	0.00403215	0.0661343
ENSG00000141736	5195.75	-0.501561	0.226278	-2.21658	0.0266521	0.182955
ENSG00000132773	209.855	-0.500313	0.233865	-2.13932	0.0324098	0.201336
ENSG00000126950	79.1479	-0.49982	0.198903	-2.51288	0.0119751	0.120736
ENSG00000133958	56.765	-0.499792	0.212739	-2.34932	0.0188078	0.154528
ENSG00000006634	546.344	-0.499453	0.137599	-3.62976	0.00028368	0.0126105
ENSG00000185298	439.691	-0.499127	0.162883	-3.06434	0.00218152	0.0454107
ENSG00000140022	150.236	-0.498871	0.189074	-2.63849	0.00832757	0.0985312
ENSG00000122952	917.233	-0.498516	0.13883	-3.59084	0.000329614	0.0136901
ENSG00000013503	286.231	-0.498437	0.156561	-3.18367	0.00145421	0.0356713
ENSG00000165156	57.6194	-0.498142	0.221015	-2.25388	0.0242037	0.174174
ENSG00000044574	7512.66	-0.497804	0.129052	-3.85741	0.000114597	0.00715561
ENSG00000196793	118.37	-0.49752	0.186466	-2.66816	0.00762681	0.0943633
ENSG00000228214	18.5742	-0.497451	0.233507	-2.13035	0.0331429	0.204176
ENSG00000234284	45.4588	-0.497285	0.217515	-2.28621	0.0222418	0.167342
ENSG00000020129	609.08	-0.496846	0.17007	-2.92142	0.00348442	0.0599031
ENSG00000135637	38.4214	-0.49675	0.225013	-2.20765	0.0272683	0.184497
ENSG00000165271	934.1	-0.496278	0.154907	-3.20371	0.00135671	0.0347951
ENSG00000145246	48.4562	-0.495936	0.217987	-2.27508	0.0229014	0.170008
ENSG00000181019	303.824	-0.49549	0.186769	-2.65295	0.00797908	0.0965167
ENSG00000173320	377.983	-0.495468	0.173732	-2.85191	0.00434569	0.0683657
ENSG00000169258	216.8	-0.495285	0.190733	-2.59675	0.00941117	0.105049
ENSG00000073111	2824.78	-0.494416	0.130651	-3.78424	0.000154177	0.00863849
ENSG00000010165	786.496	-0.494291	0.151093	-3.27143	0.00107005	0.0298196
ENSG00000166166	201.261	-0.493851	0.206992	-2.38585	0.0170399	0.146205
ENSG00000213593	765.007	-0.493618	0.144365	-3.41925	0.000627948	0.0210512
ENSG00000110975	29.3338	-0.493089	0.233474	-2.11196	0.0346897	0.208402
ENSG00000198890	541.908	-0.492696	0.148952	-3.30775	0.000940497	0.0276455
ENSG00000218418	45.8412	-0.491803	0.217235	-2.26392	0.0235792	0.172328
ENSG00000101638	25.2667	-0.491457	0.233187	-2.10757	0.0350684	0.209391
ENSG00000156603	106.287	-0.490798	0.189191	-2.59419	0.00948132	0.105498
ENSG00000232677	1077.76	-0.490747	0.154194	-3.18266	0.00145931	0.0356721
ENSG00000255121	26.3813	-0.490116	0.231755	-2.1148	0.0344472	0.207716
ENSG00000130935	1339.29	-0.489889	0.139325	-3.51617	0.00043782	0.0164679
ENSG00000119812	1113.83	-0.489098	0.138553	-3.53005	0.000415488	0.0159944
ENSG00000109220	44.2057	-0.488894	0.21987	-2.22355	0.0261786	0.181038
ENSG00000177663	162.421	-0.488565	0.185091	-2.63959	0.00830067	0.0984942
ENSG00000102096	1831.95	-0.488542	0.133976	-3.64648	0.000265855	0.0121931
ENSG00000129347	446.815	-0.488488	0.164404	-2.97126	0.00296581	0.0548063
ENSG00000100916	161.44	-0.487866	0.167534	-2.91204	0.00359075	0.060938
ENSG00000213533	16.8015	-0.487621	0.232193	-2.10007	0.0357228	0.210715
ENSG00000104218	159.694	-0.487584	0.178103	-2.73765	0.00618806	0.0839699
ENSG00000168906	2016.05	-0.487344	0.233654	-2.08575	0.0370013	0.21413
ENSG00000213971	54.2188	-0.487062	0.21114	-2.30682	0.0210648	0.163142
ENSG00000119866	226.801	-0.486845	0.166598	-2.92227	0.00347487	0.0598849
ENSG00000034533	79.4962	-0.486708	0.207042	-2.35077	0.0187345	0.154168
ENSG00000164077	95.6662	-0.485128	0.202801	-2.39214	0.0167504	0.145136
ENSG00000055732	21.1875	-0.484426	0.233327	-2.07616	0.0378788	0.216538
ENSG00000197279	61.8461	-0.483642	0.209531	-2.30822	0.0209871	0.163089
ENSG00000144043	290.924	-0.483339	0.173489	-2.786	0.0053363	0.077748
ENSG00000131467	2696.36	-0.482448	0.162188	-2.97463	0.00293343	0.0547821
ENSG00000143493	431.931	-0.482027	0.153797	-3.13418	0.00172336	0.0398454
ENSG00000183496	171.339	-0.481748	0.171538	-2.80841	0.00497864	0.0745098
ENSG00000175928	3578.26	-0.481411	0.132429	-3.63525	0.000277712	0.0124926
ENSG00000248966	17.8599	-0.481013	0.232804	-2.06617	0.0388123	0.218628
ENSG00000163888	31.9069	-0.480796	0.232808	-2.06521	0.0389035	0.218817
ENSG00000087087	1837.88	-0.480461	0.146417	-3.28147	0.00103268	0.0293801
ENSG00000135414	250.121	-0.48029	0.160316	-2.99591	0.00273631	0.0524181
ENSG00000090612	334.462	-0.480136	0.138116	-3.47633	0.000508333	0.0179832
ENSG00000249176	24.9851	-0.479248	0.233083	-2.05613	0.0397702	0.221856
ENSG00000144227	31.2797	-0.479217	0.233206	-2.0549	0.0398883	0.222127
ENSG00000160190	205.538	-0.478922	0.16191	-2.95796	0.00309684	0.0561928
ENSG00000113319	227.978	-0.478775	0.199453	-2.40044	0.0163754	0.143297
ENSG00000067369	1124.41	-0.478592	0.154596	-3.09575	0.00196316	0.0431579
ENSG00000089057	408.124	-0.478508	0.16705	-2.86446	0.00417724	0.0671213
ENSG00000198646	219.742	-0.477585	0.155165	-3.07793	0.00208447	0.0445309
ENSG00000106462	594.596	-0.477576	0.174004	-2.74462	0.00605802	0.0832977
ENSG00000168818	182.37	-0.477482	0.175674	-2.718	0.00656787	0.0869131
ENSG00000139174	118.767	-0.476532	0.221887	-2.14763	0.031743	0.198841
ENSG00000261762	25.6993	-0.475909	0.233913	-2.03456	0.0418955	0.227559
ENSG00000076003	2655.84	-0.475792	0.118989	-3.99861	6.37e-05	0.00474657
ENSG00000100038	229.803	-0.475505	0.161865	-2.93767	0.00330688	0.0584936
ENSG00000100292	295.696	-0.475361	0.184091	-2.58221	0.00981694	0.107316
ENSG00000156398	238.606	-0.475022	0.175566	-2.70565	0.00681703	0.0886277
ENSG00000169432	44.098	-0.474421	0.218199	-2.17426	0.0296855	0.192473
ENSG00000182489	11.8846	-0.473719	0.224953	-2.10586	0.0352166	NA
ENSG00000228716	458.012	-0.473398	0.147938	-3.19999	0.00137433	0.0349423
ENSG00000063244	2517.18	-0.473368	0.134027	-3.53189	0.0004126	0.0159599
ENSG00000176024	157.322	-0.472861	0.174146	-2.71532	0.00662125	0.0874338
ENSG00000198963	139.299	-0.472535	0.217767	-2.16991	0.0300134	0.193682
ENSG00000128951	1023.25	-0.472086	0.13569	-3.47915	0.000503004	0.0178781
ENSG00000166801	283.396	-0.472068	0.143924	-3.27998	0.00103816	0.0293801
ENSG00000077616	53.8732	-0.47187	0.221177	-2.13345	0.0328877	0.203274
ENSG00000122779	2558.11	-0.471382	0.11419	-4.12803	3.66e-05	0.00313042
ENSG00000107831	10.4034	-0.471044	0.195989	-2.40342	0.0162423	NA
ENSG00000053372	761.785	-0.470741	0.158277	-2.97416	0.00293795	0.0547821
ENSG00000104267	44.5898	-0.470501	0.226962	-2.07304	0.0381685	0.217136
ENSG00000234176	123.626	-0.470205	0.187275	-2.51077	0.0120467	0.120982
ENSG00000189266	59.1736	-0.470203	0.207803	-2.26274	0.023652	0.17237
ENSG00000179331	109.153	-0.468676	0.199507	-2.34917	0.0188155	0.154528
ENSG00000005249	597.843	-0.468484	0.122753	-3.81647	0.000135377	0.00800885
ENSG00000101115	1753.26	-0.468276	0.123736	-3.78448	0.00015403	0.00863849
ENSG00000198824	724.244	-0.46811	0.146444	-3.19651	0.001391	0.0352317
ENSG00000161547	2931.58	-0.467519	0.159814	-2.92539	0.00344026	0.0597947
ENSG00000180440	14.809	-0.467446	0.229053	-2.04078	0.0412727	0.226381
ENSG00000100023	427.359	-0.467394	0.145709	-3.20771	0.00133796	0.0343766
ENSG00000167112	518.413	-0.467264	0.142471	-3.27971	0.00103915	0.0293801
ENSG00000225830	97.429	-0.467112	0.182922	-2.55361	0.0106613	0.113387
ENSG00000133794	75.6069	-0.466674	0.202177	-2.30825	0.0209851	0.163089
ENSG00000122254	15.9016	-0.466437	0.231794	-2.01229	0.0441892	0.233465
ENSG00000112079	339.251	-0.466016	0.162045	-2.87585	0.0040294	0.0661343
ENSG00000180694	469.316	-0.465521	0.179961	-2.58678	0.00968763	0.106694
ENSG00000214018	31.4784	-0.465361	0.232826	-1.99875	0.0456349	0.237538
ENSG00000104142	469.419	-0.465333	0.159926	-2.90968	0.00361802	0.0611546
ENSG00000108963	118.827	-0.464218	0.18495	-2.50996	0.0120744	0.121088
ENSG00000156650	588.339	-0.463901	0.126814	-3.65812	0.000254071	0.0118848
ENSG00000124459	227.894	-0.463529	0.18554	-2.49827	0.01248	0.123007
ENSG00000196357	26.6694	-0.463455	0.232782	-1.99094	0.0464877	0.238861
ENSG00000179051	7168.67	-0.463431	0.121529	-3.81334	0.000137103	0.00804339
ENSG00000130816	2319.11	-0.463003	0.116347	-3.9795	6.91e-05	0.00500257
ENSG00000007376	239.589	-0.462888	0.195717	-2.36509	0.0180257	0.150357
ENSG00000159720	441.55	-0.462811	0.16493	-2.8061	0.00501456	0.0746126
ENSG00000187140	100.585	-0.46253	0.220915	-2.0937	0.0362867	0.212263
ENSG00000110721	356.716	-0.462499	0.187883	-2.46163	0.0138308	0.129911
ENSG00000096070	623.835	-0.462485	0.121438	-3.80839	0.000139873	0.00810455
ENSG00000163935	253.041	-0.461747	0.15402	-2.99797	0.00271783	0.0522761
ENSG00000136450	4405.63	-0.461745	0.164592	-2.8054	0.00502548	0.0746126
ENSG00000138463	165.804	-0.461604	0.177008	-2.60781	0.00911245	0.103769
ENSG00000134323	1051.98	-0.461376	0.137991	-3.34352	0.000827222	0.0255423
ENSG00000137814	361.892	-0.460747	0.150054	-3.07055	0.00213666	0.0449689
ENSG00000181449	2708.17	-0.460518	0.126833	-3.63091	0.000282424	0.0126105
ENSG00000136205	351.285	-0.460309	0.136854	-3.3635	0.000769622	0.0241343
ENSG00000111077	68.1809	-0.460104	0.21517	-2.13833	0.0324902	0.201583
ENSG00000173406	155.9	-0.45999	0.173021	-2.65857	0.00784723	0.0955788
ENSG00000117280	153.181	-0.459964	0.171248	-2.68595	0.0072324	0.0920025
ENSG00000163214	598.09	-0.459715	0.130512	-3.52239	0.000427678	0.0163389
ENSG00000102390	399.722	-0.459567	0.146201	-3.1434	0.00166999	0.0392546
ENSG00000182544	178.009	-0.459183	0.16523	-2.77906	0.00545172	0.0788092
ENSG00000172878	61.9186	-0.458966	0.212258	-2.1623	0.0305953	0.19581
ENSG00000139116	609.314	-0.458939	0.121694	-3.77126	0.000162426	0.00896847
ENSG00000104313	23.7224	-0.458472	0.233114	-1.96673	0.0492145	0.246584
ENSG00000145248	23.3687	-0.458271	0.233886	-1.95938	0.0500686	0.249105
ENSG00000198464	427.351	-0.457437	0.1664	-2.74902	0.0059774	0.0828338
ENSG00000166206	1809.49	-0.457228	0.118319	-3.86438	0.000111374	0.00703204
ENSG00000197136	635.077	-0.456994	0.142974	-3.19633	0.00139188	0.0352317
ENSG00000142002	409.51	-0.456917	0.156195	-2.9253	0.00344124	0.0597947
ENSG00000136527	3051.16	-0.45678	0.123291	-3.70488	0.000211491	0.0106731
ENSG00000162227	126.708	-0.456749	0.201732	-2.26414	0.0235657	0.172328
ENSG00000142875	453.224	-0.456275	0.15135	-3.01469	0.00257238	0.0501719
ENSG00000032219	155.265	-0.456245	0.168982	-2.69997	0.00693456	0.0896589
ENSG00000117148	14.4089	-0.455977	0.230118	-1.98149	0.0475359	0.241714
ENSG00000162408	233.863	-0.455554	0.165311	-2.75574	0.0058559	0.081685
ENSG00000131351	157.683	-0.455446	0.171263	-2.65934	0.0078294	0.0955788
ENSG00000063761	113.877	-0.454906	0.182633	-2.49082	0.0127449	0.12354
ENSG00000181027	239.777	-0.454882	0.177497	-2.56276	0.0103845	0.111528
ENSG00000031003	192.095	-0.454551	0.168079	-2.70438	0.0068431	0.0888027
ENSG00000141279	965.391	-0.454524	0.130664	-3.47857	0.00050409	0.0178781
ENSG00000144136	1321.69	-0.454458	0.13197	-3.44365	0.000573919	0.0195802
ENSG00000115998	62.0022	-0.453965	0.221267	-2.05167	0.0402021	0.22338
ENSG00000139531	254.351	-0.453703	0.168628	-2.69055	0.00713351	0.0911432
ENSG00000164082	51.1011	-0.453493	0.224575	-2.01933	0.0434525	0.231134
ENSG00000168116	267.99	-0.453231	0.142356	-3.18379	0.00145362	0.0356713
ENSG00000146834	697.395	-0.452717	0.153065	-2.95767	0.00309972	0.0561928
ENSG00000128610	161.207	-0.452557	0.23125	-1.957	0.0503477	0.250051
ENSG00000196517	252.727	-0.4524	0.169622	-2.6671	0.0076509	0.0944953
ENSG00000108296	156.191	-0.452357	0.171972	-2.63041	0.0085283	0.0999821
ENSG00000148688	497.418	-0.451598	0.146403	-3.08462	0.0020381	0.0442164
ENSG00000204514	286.513	-0.451057	0.148047	-3.04672	0.00231357	0.0472102
ENSG00000080603	1542.09	-0.450987	0.140402	-3.21212	0.00131762	0.034103
ENSG00000198746	149.38	-0.45069	0.185639	-2.42778	0.0151916	0.136676
ENSG00000110583	429.673	-0.450686	0.159561	-2.82453	0.00473495	0.0722971
ENSG00000114867	7138.69	-0.450627	0.133869	-3.36618	0.000762181	0.0239543
ENSG00000213551	63.2792	-0.449731	0.205657	-2.1868	0.0287568	0.19045
ENSG00000185085	350.406	-0.449648	0.156902	-2.8658	0.0041596	0.0670873
ENSG00000204466	212.219	-0.449495	0.199312	-2.25524	0.0241185	0.174092
ENSG00000103174	84.7184	-0.449422	0.216335	-2.07743	0.0377618	0.216221
ENSG00000177842	160.257	-0.449322	0.181957	-2.46939	0.0135343	0.127723
ENSG00000189050	26.5188	-0.449093	0.233071	-1.92685	0.0539989	0.260022
ENSG00000033050	964.9	-0.448885	0.144263	-3.11157	0.00186096	0.0418567
ENSG00000214336	71.1488	-0.448825	0.208656	-2.15102	0.0314743	0.198281
ENSG00000154803	213.423	-0.448466	0.174648	-2.56783	0.0102337	0.110498
ENSG00000105676	732.422	-0.448006	0.172079	-2.60349	0.00922792	0.104193
ENSG00000255725	45.555	-0.448002	0.217604	-2.05879	0.0395139	0.220952
ENSG00000065328	735.96	-0.447974	0.122038	-3.67077	0.000241823	0.0116605
ENSG00000118655	159.964	-0.447802	0.173522	-2.58067	0.00986093	0.107546
ENSG00000135090	70.6014	-0.447594	0.206888	-2.16346	0.0305059	0.195505
ENSG00000100478	67.7738	-0.447509	0.210012	-2.13087	0.0330996	0.204136
ENSG00000048162	333.531	-0.447274	0.168481	-2.65474	0.00793688	0.0963373
ENSG00000267383	65.1198	-0.447214	0.203339	-2.19935	0.0278531	0.186519
ENSG00000172602	87.3817	-0.447158	0.191684	-2.33279	0.0196593	0.158264
ENSG00000171793	1563.96	-0.447014	0.135879	-3.2898	0.00100259	0.0289867
ENSG00000162543	16.6581	-0.446995	0.231772	-1.92859	0.0537816	0.259593
ENSG00000231607	21.8234	-0.446733	0.233895	-1.90997	0.0561365	0.264969
ENSG00000145555	2354.03	-0.446474	0.116602	-3.82902	0.000128653	0.00774116
ENSG00000184164	200.118	-0.446251	0.171527	-2.60164	0.00927784	0.104313
ENSG00000178860	14.7425	-0.446159	0.228578	-1.95189	0.0509513	0.251276
ENSG00000260459	21.7956	-0.446071	0.233907	-1.90705	0.0565146	0.265674
ENSG00000119906	362.244	-0.445573	0.152778	-2.91648	0.00354002	0.0604163
ENSG00000257365	100.051	-0.445193	0.184599	-2.41168	0.015879	0.140384
ENSG00000086827	462.024	-0.445079	0.146224	-3.04381	0.00233603	0.0474583
ENSG00000186767	244.321	-0.444885	0.152199	-2.92305	0.00346615	0.0598082
ENSG00000007968	124.942	-0.444601	0.185495	-2.39683	0.0165375	0.144179
ENSG00000186340	471.949	-0.44443	0.171688	-2.58859	0.0096371	0.106393
ENSG00000111206	1292.21	-0.444359	0.128959	-3.44574	0.000569502	0.0195099
ENSG00000186684	49.4756	-0.444238	0.218015	-2.03765	0.0415853	0.226858
ENSG00000141030	1124.65	-0.444169	0.157553	-2.81918	0.00481467	0.0728148
ENSG00000272821	13.6071	-0.444022	0.229876	-1.93158	0.0534118	0.258705
ENSG00000213066	219.479	-0.443776	0.154697	-2.86867	0.00412198	0.0668634
ENSG00000122435	142.276	-0.443738	0.183916	-2.41272	0.0158341	0.140128
ENSG00000100813	2442.17	-0.443622	0.13496	-3.28707	0.00101235	0.0290897
ENSG00000196943	417.767	-0.44306	0.150272	-2.94838	0.00319442	0.0570056
ENSG00000166847	954.384	-0.44264	0.137262	-3.22479	0.00126063	0.0332965
ENSG00000197362	144.477	-0.442614	0.165237	-2.67865	0.00739192	0.0927614
ENSG00000167258	1381.23	-0.442437	0.123065	-3.59513	0.000324225	0.0135462
ENSG00000110107	1927.47	-0.442015	0.15135	-2.92048	0.0034949	0.0599368
ENSG00000151576	667.047	-0.441698	0.138892	-3.18015	0.001472	0.0358577
ENSG00000234332	23.3094	-0.441455	0.233268	-1.89248	0.058427	0.26981
ENSG00000128228	109.507	-0.441211	0.194027	-2.27397	0.0229681	0.170151
ENSG00000034063	290.494	-0.44121	0.195223	-2.26003	0.0238193	0.172963
ENSG00000171444	237.1	-0.440523	0.178976	-2.46135	0.0138416	0.129926
ENSG00000104522	475.088	-0.440317	0.157248	-2.80015	0.00510786	0.0753865
ENSG00000269404	73.2357	-0.440015	0.202723	-2.17052	0.0299672	0.193549
ENSG00000172936	361.38	-0.439518	0.155859	-2.81998	0.0048027	0.0727575
ENSG00000198846	152.163	-0.43935	0.177568	-2.47427	0.0133509	0.126501
ENSG00000197256	467.141	-0.438568	0.131065	-3.34619	0.000819316	0.0254096
ENSG00000008735	55.8029	-0.43853	0.223689	-1.96044	0.0499441	0.248837
ENSG00000115840	128.041	-0.438238	0.20092	-2.18115	0.0291722	0.191648
ENSG00000163873	57.5228	-0.438135	0.213274	-2.05433	0.0399437	0.222295
ENSG00000160401	14.8959	-0.437489	0.229214	-1.90865	0.0563077	0.265448
ENSG00000160606	219.21	-0.437361	0.179242	-2.44006	0.0146848	0.134348
ENSG00000145982	109.399	-0.437171	0.192798	-2.2675	0.0233595	0.171849
ENSG00000148297	746.388	-0.436619	0.163759	-2.66624	0.00767058	0.0945725
ENSG00000152439	77.9646	-0.436553	0.200454	-2.17782	0.0294196	0.192001
ENSG00000064703	523.245	-0.436461	0.14593	-2.99089	0.00278163	0.0528548
ENSG00000115993	265.951	-0.436229	0.167862	-2.59874	0.00935675	0.104891
ENSG00000225921	27.538	-0.436101	0.233873	-1.86469	0.0622245	0.277254
ENSG00000254093	192.068	-0.43575	0.17639	-2.47038	0.0134971	0.127458
ENSG00000235489	100.623	-0.43565	0.193005	-2.25719	0.023996	0.173644
ENSG00000130749	683.568	-0.43562	0.142919	-3.04803	0.00230348	0.0471083
ENSG00000147231	50.9111	-0.435268	0.220579	-1.97329	0.0484621	0.244577
ENSG00000158321	1188.19	-0.434911	0.148705	-2.92465	0.00344839	0.0597947
ENSG00000102924	54.1025	-0.434153	0.218759	-1.98462	0.0471873	0.240462
ENSG00000103150	92.0624	-0.433616	0.188995	-2.29433	0.0217716	0.165521
ENSG00000177058	395.93	-0.43357	0.182405	-2.37697	0.0174556	0.147806
ENSG00000187325	497.145	-0.433382	0.138829	-3.12169	0.00179819	0.0411445
ENSG00000184886	325.084	-0.432888	0.187225	-2.31213	0.0207705	0.162562
ENSG00000196922	260.845	-0.432494	0.172773	-2.50325	0.0123059	0.122105
ENSG00000177192	421.6	-0.432369	0.167856	-2.57584	0.00999964	0.108722
ENSG00000120800	1431.62	-0.432361	0.22547	-1.9176	0.0551619	0.262925
ENSG00000092439	689.823	-0.432356	0.146275	-2.95577	0.00311888	0.0562998
ENSG00000130489	42.9422	-0.431928	0.226833	-1.90417	0.0568883	0.266773
ENSG00000174744	388.907	-0.431913	0.166024	-2.60151	0.00928138	0.104313
ENSG00000187098	7.20042	-0.431707	0.206395	-2.09165	0.0364701	NA
ENSG00000188227	136.669	-0.431547	0.174828	-2.46842	0.0135713	0.127986
ENSG00000164591	262.449	-0.431501	0.164556	-2.62221	0.00873605	0.101238
ENSG00000204611	479.303	-0.431157	0.125074	-3.44721	0.000566415	0.0194924
ENSG00000076650	113.781	-0.431145	0.184934	-2.33135	0.0197351	0.158692
ENSG00000102935	609.007	-0.430493	0.144282	-2.9837	0.00284788	0.0538954
ENSG00000131398	59.7494	-0.429906	0.208894	-2.05801	0.0395894	0.221286
ENSG00000177108	517.641	-0.429808	0.183388	-2.34371	0.0190931	0.155937
ENSG00000270949	21.8231	-0.429699	0.233936	-1.83682	0.0662358	0.287485
ENSG00000142634	259.722	-0.429255	0.146231	-2.93546	0.00333051	0.0587638
ENSG00000105993	1586.58	-0.428882	0.140039	-3.06259	0.00219434	0.0454357
ENSG00000152795	3689.6	-0.428554	0.134889	-3.17708	0.00148767	0.0361768
ENSG00000067191	89.067	-0.427915	0.213452	-2.00474	0.0449911	0.235666
ENSG00000112787	312.574	-0.427911	0.164538	-2.60067	0.00930411	0.104384
ENSG00000140471	109.125	-0.427647	0.187434	-2.28158	0.0225139	0.168613
ENSG00000075131	226.279	-0.427607	0.190614	-2.24331	0.0248766	0.1769
ENSG00000164338	362.441	-0.427544	0.139015	-3.07553	0.0021013	0.0446923
ENSG00000198131	548.05	-0.427435	0.154256	-2.77095	0.00558933	0.0794125
ENSG00000137547	641.041	-0.427044	0.140694	-3.03526	0.00240327	0.0484092
ENSG00000100591	1355.45	-0.426659	0.121745	-3.50454	0.000457403	0.0168152
ENSG00000112499	5.65745	-0.425872	0.192293	-2.2147	0.0267805	NA
ENSG00000164045	1148.74	-0.425846	0.140753	-3.02548	0.00248235	0.049198
ENSG00000156876	232.128	-0.425181	0.143908	-2.95454	0.00313133	0.0564521
ENSG00000160193	253.169	-0.425035	0.153332	-2.77199	0.0055715	0.0792392
ENSG00000179218	8051.84	-0.424591	0.12535	-3.38725	0.000705982	0.0227465
ENSG00000067248	680.805	-0.424252	0.137876	-3.07705	0.00209063	0.0445326
ENSG00000151572	22.699	-0.423729	0.233332	-1.81599	0.0693722	0.293851
ENSG00000060749	2677.08	-0.423604	0.107714	-3.93268	8.4e-05	0.00579798
ENSG00000110442	234.796	-0.423529	0.163952	-2.58326	0.00978716	0.107218
ENSG00000104213	38.5456	-0.423026	0.222376	-1.9023	0.0571323	0.267308
ENSG00000185070	106.562	-0.422997	0.195341	-2.16543	0.0303547	0.194802
ENSG00000170684	46.808	-0.422893	0.225535	-1.87507	0.0607829	0.274214
ENSG00000254184	22.5105	-0.422829	0.233717	-1.80915	0.0704278	0.295784
ENSG00000167114	249.097	-0.42246	0.180936	-2.33486	0.0195509	0.157735
ENSG00000112031	66.8302	-0.422393	0.209533	-2.01588	0.0438125	0.232259
ENSG00000171307	499.055	-0.422275	0.145881	-2.89466	0.00379567	0.0633211
ENSG00000124614	85.8068	-0.422082	0.194679	-2.16809	0.0301522	0.194182
ENSG00000080839	190.31	-0.422081	0.157331	-2.68276	0.00730167	0.092039
ENSG00000163104	1335.4	-0.421588	0.145456	-2.89838	0.00375091	0.0627977
ENSG00000186766	6.57855	-0.421463	0.205444	-2.05147	0.0402212	NA
ENSG00000173914	207.953	-0.421382	0.17261	-2.44124	0.0146371	0.134173
ENSG00000105248	244.615	-0.421251	0.174287	-2.417	0.0156492	0.139456
ENSG00000149328	77.8757	-0.421105	0.196208	-2.14622	0.0318552	0.199077
ENSG00000169683	173.776	-0.420902	0.182998	-2.30004	0.0214462	0.164356
ENSG00000139946	366.966	-0.42057	0.129282	-3.25311	0.00114149	0.031075
ENSG00000064601	291.433	-0.420505	0.149895	-2.80533	0.0050265	0.0746126
ENSG00000272604	7.45268	-0.420357	0.206892	-2.03176	0.0421775	NA
ENSG00000102383	59.0036	-0.420249	0.210914	-1.99252	0.0463143	0.238517
ENSG00000160785	373.763	-0.420107	0.166494	-2.52325	0.0116276	0.118722
ENSG00000166105	599.573	-0.419722	0.233171	-1.80006	0.0718512	0.298603
ENSG00000143337	379.697	-0.419459	0.144071	-2.91148	0.00359719	0.0609488
ENSG00000100395	391.993	-0.419335	0.151944	-2.7598	0.00578365	0.0811396
ENSG00000168066	3275.48	-0.419292	0.125194	-3.34915	0.000810613	0.025251
ENSG00000162086	192.625	-0.418964	0.158741	-2.63929	0.00830803	0.0984942
ENSG00000214425	73.7981	-0.418935	0.211037	-1.98512	0.0471307	0.240348
ENSG00000184378	65.9322	-0.418895	0.221336	-1.89257	0.058415	0.26981
ENSG00000196700	414.672	-0.418851	0.14384	-2.91191	0.00359222	0.060938
ENSG00000116560	6016.2	-0.418848	0.138035	-3.03436	0.0024105	0.0484855
ENSG00000250510	42.5493	-0.41855	0.222697	-1.87946	0.0601822	0.273167
ENSG00000031691	247.522	-0.418409	0.143596	-2.91379	0.00357075	0.0607933
ENSG00000187730	11.2787	-0.417694	0.22528	-1.85411	0.0637231	NA
ENSG00000118894	166.225	-0.417646	0.166781	-2.50416	0.0122741	0.122047
ENSG00000163406	44.3438	-0.417379	0.226641	-1.84158	0.065536	0.285952
ENSG00000213214	70.6404	-0.417077	0.211825	-1.96897	0.0489568	0.245744
ENSG00000124357	210.103	-0.41684	0.161017	-2.58879	0.00963136	0.106393
ENSG00000176087	931.503	-0.416394	0.13726	-3.03362	0.00241639	0.0485347
ENSG00000251602	19.1797	-0.415896	0.233023	-1.78478	0.0742968	0.303859
ENSG00000006652	568.259	-0.415691	0.179647	-2.31393	0.0206715	0.162238
ENSG00000118855	76.4428	-0.415482	0.196604	-2.11329	0.0345761	0.208047
ENSG00000164548	1072.11	-0.415337	0.126017	-3.29587	0.000981168	0.0284256
ENSG00000092094	313.232	-0.415215	0.16641	-2.49513	0.0125912	0.123114
ENSG00000197701	24.6116	-0.415207	0.23266	-1.78461	0.0743247	0.303859
ENSG00000111641	903.046	-0.415191	0.150357	-2.76137	0.00575596	0.0809417
ENSG00000242419	58.8932	-0.415005	0.207718	-1.99793	0.0457247	0.23768
ENSG00000143297	9.67744	-0.414992	0.219257	-1.89272	0.0583957	NA
ENSG00000173334	657.597	-0.414901	0.128645	-3.22517	0.00125898	0.0332965
ENSG00000143624	1032.39	-0.414499	0.124631	-3.3258	0.000881656	0.0266417
ENSG00000185442	216.376	-0.414497	0.168838	-2.455	0.0140885	0.131542
ENSG00000127152	51.0402	-0.414488	0.213323	-1.94301	0.0520147	0.254659
ENSG00000136824	976.605	-0.414316	0.134419	-3.08226	0.00205433	0.0443635
ENSG00000156983	333.493	-0.413886	0.161223	-2.56717	0.0102531	0.110539
ENSG00000114861	160.479	-0.413859	0.163186	-2.53612	0.0112087	0.116214
ENSG00000178295	214.418	-0.413806	0.187015	-2.21269	0.0269191	0.183207
ENSG00000119927	371.08	-0.413565	0.147901	-2.79622	0.00517035	0.0761491
ENSG00000197728	123.442	-0.413399	0.185512	-2.22843	0.0258519	0.180285
ENSG00000132932	189.503	-0.413146	0.166279	-2.48465	0.0129678	0.124276
ENSG00000145087	88.7174	-0.412562	0.202833	-2.034	0.0419515	0.227559
ENSG00000138231	192.795	-0.412425	0.161509	-2.55358	0.0106622	0.113387
ENSG00000150787	116.468	-0.412405	0.185883	-2.21863	0.026512	0.182359
ENSG00000185917	236.037	-0.412378	0.19262	-2.14089	0.032283	0.20077
ENSG00000101773	662.919	-0.412182	0.128492	-3.20784	0.00133736	0.0343766
ENSG00000183978	333.598	-0.412097	0.149345	-2.75935	0.00579157	0.0811396
ENSG00000140830	97.0567	-0.41197	0.185451	-2.22145	0.0263207	0.181753
ENSG00000254221	28.7639	-0.411964	0.229808	-1.79264	0.0730306	0.301342
ENSG00000269153	44.2942	-0.411952	0.225897	-1.82363	0.0682082	0.29129
ENSG00000171823	45.4132	-0.411798	0.228963	-1.79853	0.0720923	0.299075
ENSG00000270145	59.3524	-0.411786	0.206326	-1.99581	0.0459549	0.23771
ENSG00000103540	246.761	-0.41156	0.15027	-2.73881	0.00616626	0.0839699
ENSG00000259838	21.1171	-0.411404	0.233938	-1.7586	0.0786448	0.312958
ENSG00000128578	110.727	-0.411259	0.18027	-2.28135	0.022528	0.168613
ENSG00000086712	932.679	-0.411159	0.143452	-2.86619	0.00415451	0.067082
ENSG00000156453	2285.8	-0.410985	0.135561	-3.03174	0.0024315	0.0487274
ENSG00000215007	15.0154	-0.410667	0.231053	-1.77737	0.0755079	0.306031
ENSG00000094804	1660.61	-0.410509	0.144922	-2.83262	0.00461685	0.0715917
ENSG00000181544	90.8679	-0.410276	0.19104	-2.14758	0.0317468	0.198841
ENSG00000104381	439.787	-0.410236	0.149236	-2.74891	0.00597942	0.0828338
ENSG00000132661	146.188	-0.410118	0.194227	-2.11154	0.0347256	0.208413
ENSG00000112081	6373.32	-0.40981	0.121148	-3.38272	0.000717718	0.0230545
ENSG00000134294	6422.43	-0.409658	0.153873	-2.66231	0.00776075	0.0951814
ENSG00000103978	461.292	-0.409504	0.160901	-2.54507	0.0109256	0.115057
ENSG00000187955	753.025	-0.409203	0.113184	-3.61537	0.000299921	0.0129935
ENSG00000077063	388.331	-0.409111	0.162307	-2.5206	0.0117155	0.118944
ENSG00000104320	555.346	-0.409077	0.132198	-3.09444	0.00197186	0.0431863
ENSG00000100461	498.263	-0.409074	0.138698	-2.94938	0.00318413	0.0569664
ENSG00000140320	594.88	-0.408913	0.144515	-2.82956	0.00466127	0.0720026
ENSG00000175283	231.232	-0.408673	0.188711	-2.16561	0.0303413	0.194802
ENSG00000261643	5.7648	-0.408613	0.195111	-2.09426	0.0362364	NA
ENSG00000109111	1548.74	-0.408436	0.133139	-3.06774	0.00215687	0.0451243
ENSG00000072849	274.825	-0.408434	0.171632	-2.3797	0.0173266	0.147285
ENSG00000023572	41.1279	-0.408399	0.228833	-1.78471	0.074309	0.303859
ENSG00000253507	623.117	-0.407889	0.140572	-2.90164	0.0037121	0.0623705
ENSG00000166788	496.97	-0.407713	0.138865	-2.93604	0.00332431	0.058728
ENSG00000162493	1509.8	-0.407673	0.127668	-3.19322	0.00140694	0.0352402
ENSG00000105607	389.439	-0.407641	0.137197	-2.97121	0.00296624	0.0548063
ENSG00000257267	313.229	-0.407534	0.147872	-2.75599	0.0058514	0.081685
ENSG00000085511	708.52	-0.407507	0.116074	-3.51075	0.00044685	0.0166007
ENSG00000118292	57.7753	-0.407483	0.208531	-1.95407	0.0506933	0.250391
ENSG00000180287	56.5269	-0.407189	0.214062	-1.9022	0.0571446	0.267308
ENSG00000055044	2015.97	-0.407186	0.136969	-2.97283	0.00295068	0.0548063
ENSG00000101844	26.5059	-0.407168	0.233255	-1.74559	0.0808815	0.316865
ENSG00000068654	1261.6	-0.407129	0.138448	-2.94066	0.00327515	0.058225
ENSG00000174371	484.968	-0.406993	0.135916	-2.99444	0.00274952	0.0525282
ENSG00000177000	175.165	-0.406705	0.166339	-2.44504	0.0144837	0.133544
ENSG00000105229	360.8	-0.406687	0.14275	-2.84894	0.00438647	0.0687768
ENSG00000081138	10.6639	-0.406613	0.213098	-1.9081	0.0563781	NA
ENSG00000113758	4118.18	-0.406445	0.132069	-3.07751	0.00208739	0.0445309
ENSG00000090520	826.452	-0.406388	0.139959	-2.90363	0.00368866	0.062054
ENSG00000162413	418.691	-0.406195	0.176009	-2.30781	0.0210096	0.163142
ENSG00000117408	297.254	-0.405903	0.149675	-2.7119	0.00668979	0.087866
ENSG00000139719	342.148	-0.40583	0.136605	-2.97083	0.00296997	0.0548063
ENSG00000188760	66.7857	-0.405771	0.208175	-1.94918	0.0512734	0.252423
ENSG00000113504	505.627	-0.405491	0.14353	-2.82513	0.00472616	0.0722971
ENSG00000164172	171.155	-0.40536	0.163177	-2.48418	0.012985	0.124276
ENSG00000180035	552.631	-0.404991	0.146976	-2.75549	0.0058605	0.081685
ENSG00000105953	1195.57	-0.40467	0.108727	-3.72187	0.00019775	0.0103123
ENSG00000011007	866.256	-0.404496	0.13762	-2.93923	0.00329027	0.0583464
ENSG00000110108	338.531	-0.404196	0.16097	-2.511	0.0120389	0.120982
ENSG00000120328	87.5201	-0.404022	0.187511	-2.15465	0.0311891	0.19797
ENSG00000130165	547.732	-0.403221	0.159911	-2.52154	0.0116843	0.118944
ENSG00000224420	14.2154	-0.403143	0.2283	-1.76585	0.0774212	0.31039
ENSG00000171503	116.823	-0.40309	0.190894	-2.11159	0.0347218	0.208413
ENSG00000163939	1092.44	-0.402874	0.132641	-3.03732	0.00238693	0.0481489
ENSG00000007392	525.849	-0.402256	0.142313	-2.82656	0.00470503	0.0721844
ENSG00000101442	164.639	-0.402065	0.183534	-2.19068	0.0284749	0.189027
ENSG00000177082	190.114	-0.401524	0.1763	-2.2775	0.0227561	0.169796
ENSG00000241127	177.394	-0.401346	0.185569	-2.16279	0.0305577	0.195658
ENSG00000197019	69.8567	-0.401342	0.199741	-2.00931	0.0445038	0.23416
ENSG00000260804	46.0387	-0.401215	0.227879	-1.76065	0.0782974	0.31217
ENSG00000108379	17.8059	-0.400896	0.230831	-1.73675	0.0824316	0.320706
ENSG00000175782	81.9576	-0.400878	0.206251	-1.94364	0.0519385	0.254452
ENSG00000165379	18.0939	-0.400804	0.227805	-1.75941	0.0785073	0.312697
ENSG00000132382	1604.78	-0.400493	0.154559	-2.59121	0.00956401	0.106033
ENSG00000184677	329.834	-0.400304	0.233619	-1.71349	0.0866217	0.329008
ENSG00000100906	161.639	-0.400302	0.176954	-2.26219	0.0236857	0.172527
ENSG00000198157	316.057	-0.400115	0.133817	-2.99002	0.00278958	0.0529344
ENSG00000174842	338.766	-0.399971	0.155439	-2.57317	0.0100772	0.109124
ENSG00000226268	63.8967	-0.399487	0.201137	-1.98614	0.0470178	0.240182
ENSG00000101057	2265.43	-0.399418	0.134295	-2.97419	0.0029376	0.0547821
ENSG00000164209	290.985	-0.399337	0.156491	-2.55182	0.0107162	0.113703
ENSG00000173918	14.6966	-0.399165	0.231552	-1.72387	0.0847314	0.325562
ENSG00000182473	614.721	-0.39867	0.138881	-2.87058	0.00409719	0.0667
ENSG00000188807	313.139	-0.39866	0.167195	-2.38441	0.0171065	0.146407
ENSG00000081087	201.658	-0.398638	0.161712	-2.46511	0.013697	0.128827
ENSG00000230590	21.4208	-0.398623	0.233552	-1.70679	0.0878618	0.3314
ENSG00000145833	1809.73	-0.398186	0.130603	-3.04883	0.00229738	0.0471083
ENSG00000241015	141.272	-0.397753	0.177258	-2.24392	0.0248375	0.176842
ENSG00000003096	181.594	-0.397752	0.158499	-2.50949	0.0120907	0.121125
ENSG00000229334	4.27501	-0.397626	0.17445	-2.27931	0.0226488	NA
ENSG00000203772	16.1855	-0.397552	0.230428	-1.72527	0.084478	0.325114
ENSG00000197705	30.8973	-0.397525	0.230119	-1.72747	0.0840829	0.324328
ENSG00000188859	19.8844	-0.397285	0.233937	-1.69826	0.089459	0.334906
ENSG00000176095	585.114	-0.397157	0.15321	-2.59224	0.00953545	0.105928
ENSG00000153443	296.991	-0.396955	0.178619	-2.22235	0.0262596	0.181509
ENSG00000272655	11.5115	-0.396768	0.214298	-1.85148	0.0641012	NA
ENSG00000124688	281.604	-0.396465	0.164445	-2.41093	0.0159118	0.140508
ENSG00000111731	830.338	-0.396093	0.123055	-3.21882	0.00128719	0.0335622
ENSG00000132646	2695.18	-0.396032	0.13547	-2.92339	0.00346241	0.0598082
ENSG00000132768	759.674	-0.39588	0.154007	-2.57053	0.0101543	0.109726
ENSG00000109956	420.561	-0.39564	0.14616	-2.7069	0.00679148	0.0885996
ENSG00000160179	61.8714	-0.39553	0.207035	-1.91045	0.0560748	0.264969
ENSG00000162851	266.108	-0.395112	0.151536	-2.60739	0.0091236	0.103769
ENSG00000213222	96.57	-0.395077	0.207117	-1.9075	0.0564558	0.265497
ENSG00000033011	198.024	-0.395003	0.186912	-2.11331	0.0345741	0.208047
ENSG00000117395	855.01	-0.394872	0.158015	-2.49896	0.012456	0.122988
ENSG00000095319	2105.91	-0.394857	0.112348	-3.51458	0.000440444	0.0164932
ENSG00000137275	302.146	-0.39481	0.189147	-2.08732	0.0368591	0.213922
ENSG00000136891	1378.08	-0.394674	0.140719	-2.80469	0.00503654	0.0746469
ENSG00000136937	1379.52	-0.394671	0.123753	-3.18918	0.00142678	0.0353838
ENSG00000177283	72.3439	-0.394567	0.204273	-1.93157	0.0534131	0.258705
ENSG00000100583	5.99227	-0.394421	0.189256	-2.08406	0.0371544	NA
ENSG00000196776	144.04	-0.394242	0.165296	-2.38506	0.0170763	0.14625
ENSG00000172572	64.2104	-0.394203	0.204323	-1.92931	0.0536922	0.259432
ENSG00000120659	35.1182	-0.394044	0.227224	-1.73417	0.0828883	0.32203
ENSG00000206190	49.4355	-0.393724	0.22039	-1.78649	0.0740195	0.303228
ENSG00000183864	942.899	-0.393622	0.125274	-3.14208	0.00167752	0.0392574
ENSG00000179059	1548.28	-0.393404	0.128392	-3.06407	0.00218346	0.0454107
ENSG00000260400	21.1535	-0.393157	0.23393	-1.68066	0.0928285	0.34126
ENSG00000197170	1017.37	-0.393126	0.136952	-2.87054	0.00409769	0.0667
ENSG00000100796	1217.43	-0.392674	0.129222	-3.03874	0.00237567	0.0479905
ENSG00000256663	106.909	-0.392633	0.223137	-1.7596	0.0784749	0.312656
ENSG00000184304	68.1858	-0.392619	0.21703	-1.80905	0.0704431	0.295784
ENSG00000185652	10.2932	-0.392451	0.222027	-1.76758	0.0771309	NA
ENSG00000115129	195.911	-0.392304	0.175894	-2.23034	0.0257248	0.179844
ENSG00000183060	148.284	-0.392226	0.174877	-2.24287	0.0249054	0.177015
ENSG00000051108	239.27	-0.392151	0.178081	-2.20209	0.0276586	0.185798
ENSG00000100101	175.656	-0.391988	0.178377	-2.19753	0.0279828	0.186926
ENSG00000137776	1699.89	-0.391839	0.229862	-1.70467	0.0882561	0.332001
ENSG00000161526	572.087	-0.391737	0.125688	-3.11675	0.00182858	0.0413928
ENSG00000213516	891.374	-0.391549	0.126269	-3.10091	0.00192927	0.0426956
ENSG00000127720	55.856	-0.391483	0.223925	-1.74828	0.0804157	0.316272
ENSG00000150510	713.141	-0.390861	0.153822	-2.54099	0.011054	0.115596
ENSG00000205903	67.3545	-0.390724	0.207121	-1.88645	0.0592346	0.270921
ENSG00000143315	151.652	-0.390636	0.19734	-1.97951	0.0477583	0.242407
ENSG00000171320	300.518	-0.390594	0.162463	-2.40421	0.0162077	0.142272
ENSG00000082516	935.224	-0.390391	0.127868	-3.05307	0.00226514	0.0466275
ENSG00000186792	28.8001	-0.390356	0.233741	-1.67003	0.0949125	0.345404
ENSG00000198952	1777.5	-0.390318	0.143514	-2.71973	0.00653357	0.0867855
ENSG00000183605	198.112	-0.390079	0.172069	-2.26698	0.0233912	0.171849
ENSG00000161265	28.6885	-0.390071	0.230862	-1.68963	0.0910987	0.3384
ENSG00000234664	371.065	-0.389723	0.149599	-2.60512	0.00918434	0.103962
ENSG00000182319	497.335	-0.389704	0.150883	-2.58283	0.00979947	0.107218
ENSG00000125351	478.756	-0.389536	0.125885	-3.09438	0.00197222	0.0431863
ENSG00000058799	341.807	-0.389477	0.140747	-2.76721	0.00565389	0.0799608
ENSG00000083817	132.139	-0.389466	0.175775	-2.21571	0.0267112	0.183103
ENSG00000143942	109.365	-0.389464	0.209039	-1.86312	0.0624457	0.277799
ENSG00000005889	214.427	-0.389371	0.172699	-2.25462	0.0241572	0.174092
ENSG00000110697	375.571	-0.389322	0.161703	-2.40763	0.0160565	0.141385
ENSG00000141655	121.863	-0.389305	0.227289	-1.71282	0.0867457	0.329223
ENSG00000090316	804.787	-0.38928	0.145871	-2.66866	0.00761553	0.0943066
ENSG00000173801	1511.67	-0.389264	0.107058	-3.63602	0.000276886	0.0124926
ENSG00000175344	9.89853	-0.389142	0.220853	-1.76199	0.0780703	NA
ENSG00000164251	350.307	-0.388851	0.141785	-2.74253	0.00609672	0.0836632
ENSG00000158882	148.465	-0.38881	0.201175	-1.9327	0.0532736	0.258385
ENSG00000018236	192.179	-0.388768	0.159087	-2.44375	0.0145356	0.13362
ENSG00000125459	104.93	-0.388539	0.187558	-2.07157	0.0383052	0.217495
ENSG00000069702	57.5807	-0.388428	0.221783	-1.75139	0.0798789	0.315388
ENSG00000167721	1376.17	-0.388411	0.147406	-2.63497	0.0084146	0.0991443
ENSG00000134815	375.106	-0.388079	0.138956	-2.79282	0.00522504	0.076634
ENSG00000177302	408.855	-0.387927	0.137561	-2.82004	0.00480171	0.0727575
ENSG00000178252	1970.11	-0.387613	0.12984	-2.98531	0.00283287	0.0536835
ENSG00000100296	600.641	-0.387569	0.145981	-2.65492	0.00793268	0.0963373
ENSG00000103042	406.269	-0.387554	0.148991	-2.60118	0.00929033	0.104313
ENSG00000158246	1079.66	-0.38693	0.152316	-2.54032	0.0110752	0.115596
ENSG00000011332	87.2933	-0.386885	0.220261	-1.75648	0.0790059	0.313658
ENSG00000129646	26.7068	-0.386532	0.232548	-1.66216	0.0964807	0.348767
ENSG00000134262	64.1446	-0.386182	0.204083	-1.89228	0.0584539	0.269846
ENSG00000125812	209.884	-0.385979	0.165222	-2.33613	0.0194847	0.157531
ENSG00000117707	8.20772	-0.385912	0.21436	-1.8003	0.0718132	NA
ENSG00000106635	294.572	-0.385901	0.171156	-2.25467	0.0241539	0.174092
ENSG00000139291	81.7519	-0.385381	0.193758	-1.98898	0.0467035	0.23947
ENSG00000148187	282.007	-0.38524	0.150628	-2.55756	0.0105408	0.112757
ENSG00000162377	474.514	-0.384732	0.152191	-2.52796	0.0114727	0.117829
ENSG00000164683	18.8266	-0.384537	0.232578	-1.65337	0.0982563	0.352112
ENSG00000263606	34.0128	-0.384453	0.2284	-1.68324	0.0923283	0.340577
ENSG00000078269	391.432	-0.384157	0.18821	-2.0411	0.0412404	0.226295
ENSG00000183617	205.342	-0.384023	0.178946	-2.14603	0.0318707	0.199086
ENSG00000093144	627.138	-0.38352	0.138172	-2.77567	0.00550877	0.0789891
ENSG00000099290	51.4722	-0.383497	0.21403	-1.79179	0.0731665	0.301478
ENSG00000102974	1348.17	-0.383437	0.12118	-3.16421	0.00155507	0.037428
ENSG00000135249	226.986	-0.383303	0.159584	-2.4019	0.0163103	0.142919
ENSG00000052749	766.75	-0.383018	0.168699	-2.27043	0.0231816	0.171157
ENSG00000136367	402.145	-0.382956	0.143279	-2.6728	0.00752205	0.0936171
ENSG00000067533	619.75	-0.382826	0.142751	-2.68178	0.00732324	0.0921459
ENSG00000136859	168.281	-0.382719	0.181736	-2.10591	0.0352121	0.209644
ENSG00000205765	720.51	-0.382485	0.121642	-3.14434	0.00166461	0.0391971
ENSG00000168806	151.301	-0.38243	0.192096	-1.99083	0.0464999	0.238861
ENSG00000102078	52.0972	-0.382199	0.213614	-1.78921	0.0735818	0.302226
ENSG00000168283	46.5092	-0.381999	0.22256	-1.71639	0.0860911	0.328144
ENSG00000132664	218.62	-0.38153	0.155911	-2.4471	0.0144011	0.133225
ENSG00000105926	753.798	-0.3815	0.157532	-2.42172	0.0154471	0.138462
ENSG00000164002	34.0975	-0.381468	0.22985	-1.65963	0.0969881	0.350082
ENSG00000180901	608.056	-0.381427	0.14202	-2.68572	0.00723746	0.0920025
ENSG00000171130	164.704	-0.381372	0.176176	-2.16472	0.0304095	0.195064
ENSG00000124228	812.244	-0.381281	0.135548	-2.81288	0.00491004	0.0737816
ENSG00000107951	397.296	-0.381259	0.13284	-2.87006	0.00410388	0.0667236
ENSG00000147402	227.728	-0.380989	0.150028	-2.53945	0.0111027	0.115797
ENSG00000233757	49.7315	-0.380848	0.214243	-1.77765	0.0754613	0.306018
ENSG00000196151	58.5027	-0.38066	0.206341	-1.84481	0.0650647	0.285304
ENSG00000196152	49.9598	-0.380593	0.214891	-1.7711	0.0765446	0.30881
ENSG00000137265	18.2472	-0.380469	0.233283	-1.63093	0.102905	0.360278
ENSG00000144736	353.259	-0.380274	0.155505	-2.44542	0.0144685	0.133544
ENSG00000100473	108.909	-0.380168	0.182226	-2.08624	0.0369569	0.21413
ENSG00000175029	2298.71	-0.380062	0.117468	-3.23544	0.00121456	0.0323883
ENSG00000114648	423.593	-0.379708	0.174158	-2.18024	0.0292395	0.191648
ENSG00000110660	378.569	-0.379549	0.146184	-2.59637	0.00942134	0.105049
ENSG00000140396	820.428	-0.379535	0.137457	-2.76113	0.0057602	0.0809417
ENSG00000140832	312.772	-0.379385	0.141456	-2.68201	0.00731821	0.0921459
ENSG00000144040	289.126	-0.379206	0.169587	-2.23605	0.0253482	0.178752
ENSG00000132467	598.257	-0.379184	0.143826	-2.6364	0.00837898	0.0988902
ENSG00000153187	9083.49	-0.379091	0.114405	-3.31359	0.000921071	0.0272291
ENSG00000197498	836.969	-0.378955	0.159757	-2.37207	0.0176888	0.14878
ENSG00000110046	257.701	-0.378886	0.163823	-2.31278	0.0207347	0.162552
ENSG00000134575	210.145	-0.378558	0.18117	-2.08951	0.0366615	0.213301
ENSG00000143753	697.826	-0.378438	0.142603	-2.65378	0.00795954	0.0963631
ENSG00000197586	333.655	-0.378312	0.139076	-2.72019	0.00652436	0.0867855
ENSG00000149782	1407.93	-0.378274	0.137542	-2.75024	0.00595513	0.0826906
ENSG00000161618	312.448	-0.37818	0.176182	-2.14653	0.0318309	0.199014
ENSG00000167106	436.64	-0.378114	0.127912	-2.95604	0.00311619	0.0562998
ENSG00000078725	274.478	-0.378061	0.185102	-2.04244	0.0411075	0.226036
ENSG00000113312	738.271	-0.377801	0.137616	-2.74533	0.00604493	0.0832091
ENSG00000174327	38.5712	-0.377748	0.225865	-1.67245	0.0944361	0.344757
ENSG00000187231	406.863	-0.37755	0.158427	-2.38312	0.0171668	0.146668
ENSG00000151725	935.751	-0.376972	0.135898	-2.77393	0.00553843	0.0792037
ENSG00000153885	454.529	-0.37689	0.14314	-2.63302	0.00846298	0.0994648
ENSG00000028528	635.759	-0.376784	0.133783	-2.81637	0.0048569	0.0732174
ENSG00000197299	736.288	-0.376706	0.145525	-2.5886	0.00963668	0.106393
ENSG00000173599	198.486	-0.376595	0.162677	-2.31499	0.0206137	0.162055
ENSG00000148840	1476.9	-0.376562	0.126874	-2.968	0.00299746	0.0550405
ENSG00000164663	459.992	-0.376374	0.131106	-2.87077	0.00409478	0.0667
ENSG00000116833	91.7211	-0.376181	0.226014	-1.66441	0.0960304	0.348033
ENSG00000108091	1363.06	-0.376146	0.124562	-3.01976	0.00252978	0.0497575
ENSG00000174243	1366.57	-0.376043	0.118078	-3.18469	0.00144909	0.0356699
ENSG00000148291	190.137	-0.375978	0.18867	-1.99278	0.0462851	0.238517
ENSG00000196187	272.304	-0.375934	0.173179	-2.17078	0.0299476	0.193512
ENSG00000137338	132.279	-0.375895	0.182722	-2.05719	0.0396678	0.221636
ENSG00000130762	219.066	-0.375621	0.172354	-2.17936	0.0293053	0.191648
ENSG00000123473	556.225	-0.375537	0.131527	-2.8552	0.00430096	0.0680422
ENSG00000215102	42.9419	-0.375387	0.220959	-1.6989	0.0893385	0.334544
ENSG00000136718	762.607	-0.375303	0.137991	-2.71975	0.00653309	0.0867855
ENSG00000162664	701.414	-0.375151	0.11588	-3.23741	0.00120622	0.0322649
ENSG00000171824	844.906	-0.375145	0.150516	-2.49239	0.0126885	0.12338
ENSG00000055130	1315.53	-0.37511	0.133872	-2.802	0.00507865	0.075124
ENSG00000105726	676.982	-0.374963	0.153175	-2.44794	0.0143676	0.133024
ENSG00000231638	5.63641	-0.374789	0.182309	-2.0558	0.0398022	NA
ENSG00000146776	399.722	-0.374779	0.1492	-2.51192	0.0120075	0.120909
ENSG00000153037	146.147	-0.374764	0.18984	-1.9741	0.0483701	0.244367
ENSG00000136273	165.545	-0.374235	0.177202	-2.11191	0.0346943	0.208402
ENSG00000151090	16.4346	-0.374096	0.228432	-1.63767	0.101491	0.358324
ENSG00000090273	1622.89	-0.373892	0.126482	-2.95608	0.00311576	0.0562998
ENSG00000060762	53.6175	-0.373818	0.221864	-1.6849	0.0920077	0.340196
ENSG00000103549	703.58	-0.373341	0.153112	-2.43836	0.0147543	0.134721
ENSG00000049283	28.9053	-0.373252	0.231069	-1.61533	0.10624	0.366093
ENSG00000244165	37.1145	-0.373221	0.226757	-1.6459	0.0997839	0.354869
ENSG00000182318	43.0915	-0.373196	0.228862	-1.63066	0.102962	0.360354
ENSG00000213341	321.166	-0.373131	0.169803	-2.19743	0.0279896	0.186926
ENSG00000161040	14.0322	-0.373105	0.227512	-1.63993	0.101019	0.357194
ENSG00000007923	731.694	-0.373003	0.131365	-2.83945	0.00451917	0.0703093
ENSG00000167536	50.5987	-0.372865	0.221604	-1.68258	0.0924571	0.340775
ENSG00000168259	1052.82	-0.37281	0.141223	-2.63986	0.008294	0.0984942
ENSG00000144659	492.735	-0.372563	0.146587	-2.54159	0.011035	0.115596
ENSG00000234964	135.803	-0.372493	0.182682	-2.03903	0.0414475	0.226533
ENSG00000168938	46.8999	-0.372348	0.216014	-1.72373	0.0847574	0.325562
ENSG00000182810	210.735	-0.372268	0.179772	-2.07078	0.0383794	0.217595
ENSG00000120709	967.69	-0.372211	0.116715	-3.18905	0.00142741	0.0353838
ENSG00000160818	847.562	-0.372175	0.149736	-2.48554	0.0129355	0.124237
ENSG00000168395	460.448	-0.372081	0.147307	-2.52589	0.0115404	0.118174
ENSG00000141179	183.223	-0.371868	0.166179	-2.23775	0.0252371	0.178383
ENSG00000256683	80.3803	-0.371779	0.2024	-1.83685	0.0662318	0.287485
ENSG00000145354	315.202	-0.371519	0.155683	-2.38638	0.017015	0.14608
ENSG00000250859	32.4139	-0.371508	0.228491	-1.62592	0.103967	0.362162
ENSG00000230667	70.8055	-0.371426	0.198812	-1.86822	0.061731	0.27627
ENSG00000166411	115.409	-0.371243	0.194341	-1.91026	0.0560993	0.264969
ENSG00000104738	4983.23	-0.370898	0.131189	-2.82721	0.0046955	0.0721844
ENSG00000131831	11.8799	-0.370839	0.223549	-1.65887	0.0971415	NA
ENSG00000270069	13.6024	-0.370835	0.229904	-1.613	0.106744	0.367102
ENSG00000006744	1292.47	-0.370745	0.13098	-2.83055	0.00464685	0.0718985
ENSG00000161551	127.518	-0.370494	0.184308	-2.01019	0.0444108	0.234059
ENSG00000269837	131.812	-0.370402	0.19361	-1.91314	0.0557305	0.264382
ENSG00000238123	9.90007	-0.370206	0.221543	-1.67104	0.0947147	NA
ENSG00000185052	75.4832	-0.37018	0.212676	-1.74058	0.0817567	0.319139
ENSG00000168876	92.6703	-0.370013	0.193302	-1.91417	0.0555985	0.264201
ENSG00000188971	188.995	-0.370003	0.172521	-2.14468	0.0319782	0.199492
ENSG00000160633	1144.86	-0.369962	0.138676	-2.66783	0.00763436	0.0943738
ENSG00000175093	178.293	-0.369962	0.18049	-2.04977	0.0403872	0.224143
ENSG00000122035	23.8942	-0.369945	0.233925	-1.58147	0.113771	0.379102
ENSG00000132286	374.307	-0.369937	0.167004	-2.21513	0.0267509	0.18319
ENSG00000102393	388.077	-0.369703	0.14823	-2.49412	0.0126271	0.123124
ENSG00000128908	554.332	-0.369665	0.153351	-2.41059	0.0159269	0.140508
ENSG00000077809	850.025	-0.369423	0.11755	-3.14268	0.00167409	0.0392574
ENSG00000160908	151.848	-0.369414	0.172161	-2.14574	0.0318937	0.199115
ENSG00000242808	48.5654	-0.369366	0.220403	-1.67587	0.0937641	0.343347
ENSG00000180185	135.708	-0.369209	0.165997	-2.22418	0.026136	0.180957
ENSG00000224411	896.991	-0.369144	0.123122	-2.99821	0.00271574	0.0522761
ENSG00000130810	45.7848	-0.368891	0.223481	-1.65066	0.0988085	0.352997
ENSG00000228818	115.324	-0.368716	0.18545	-1.98822	0.0467871	0.239582
ENSG00000120158	298.638	-0.36869	0.15494	-2.37956	0.0173332	0.147285
ENSG00000263002	92.9005	-0.368594	0.187251	-1.96844	0.0490169	0.24587
ENSG00000204070	192.367	-0.367923	0.162045	-2.2705	0.0231773	0.171157
ENSG00000138030	62.9419	-0.367868	0.222162	-1.65586	0.0977512	0.351398
ENSG00000198018	184.091	-0.367691	0.168267	-2.18516	0.0288768	0.190796
ENSG00000100084	261.015	-0.367677	0.157361	-2.33653	0.0194639	0.157531
ENSG00000074219	1458.32	-0.367645	0.135596	-2.71132	0.00670158	0.0879387
ENSG00000125386	361.249	-0.367511	0.137674	-2.66943	0.00759808	0.0941734
ENSG00000112378	980.957	-0.367369	0.119229	-3.08121	0.00206159	0.0444521
ENSG00000135966	410.521	-0.367364	0.134812	-2.72501	0.00642988	0.0860577
ENSG00000071054	2336.25	-0.366888	0.112027	-3.27499	0.00105667	0.0295784
ENSG00000113643	1366.4	-0.366832	0.133695	-2.7438	0.00607322	0.0834253
ENSG00000110218	467.353	-0.366582	0.132464	-2.76741	0.00565028	0.0799608
ENSG00000157895	285.526	-0.366492	0.153849	-2.38215	0.0172119	0.146854
ENSG00000117713	2535.23	-0.366483	0.108399	-3.38086	0.000722596	0.0230706
ENSG00000145623	56.9655	-0.366472	0.22094	-1.6587	0.0971772	0.350565
ENSG00000117625	199.148	-0.366459	0.165507	-2.21416	0.026818	0.183207
ENSG00000234912	25.1638	-0.366434	0.233925	-1.56646	0.117241	0.384574
ENSG00000064270	16.1558	-0.366395	0.232458	-1.57618	0.114985	0.381028
ENSG00000144339	12.0357	-0.366372	0.214206	-1.71037	0.0871976	NA
ENSG00000166106	67.3511	-0.366319	0.224448	-1.63209	0.102661	0.360144
ENSG00000187240	296.06	-0.366317	0.143065	-2.5605	0.0104521	0.112025
ENSG00000164749	24.7005	-0.36586	0.232245	-1.57532	0.115183	0.381527
ENSG00000125454	82.2221	-0.365736	0.202197	-1.80881	0.0704799	0.295784
ENSG00000154188	22.4301	-0.365724	0.23138	-1.58062	0.113964	0.379611
ENSG00000214331	14.9625	-0.365714	0.230705	-1.5852	0.112921	0.377744
ENSG00000215492	10.053	-0.365698	0.222715	-1.642	0.10059	NA
ENSG00000214259	8.00103	-0.36528	0.213736	-1.70903	0.0874459	NA
ENSG00000172534	2278.12	-0.365235	0.135868	-2.68816	0.00718479	0.0916371
ENSG00000117593	774.203	-0.365088	0.121854	-2.9961	0.00273457	0.0524181
ENSG00000135116	35.7961	-0.36504	0.227882	-1.60188	0.109182	0.371324
ENSG00000198933	211.259	-0.364961	0.163295	-2.23498	0.0254185	0.178752
ENSG00000152253	265.805	-0.364729	0.152297	-2.39485	0.0166273	0.144425
ENSG00000004864	1201.82	-0.364628	0.124526	-2.92813	0.00341012	0.0597938
ENSG00000168496	1210.82	-0.364592	0.131712	-2.7681	0.00563835	0.0799476
ENSG00000146859	120.072	-0.364566	0.174485	-2.08938	0.0366732	0.213301
ENSG00000160229	59.4932	-0.364516	0.213753	-1.70532	0.0881354	0.331978
ENSG00000146872	383.967	-0.364401	0.144338	-2.52464	0.0115817	0.11851
ENSG00000103490	76.8948	-0.364341	0.198627	-1.8343	0.0666096	0.288166
ENSG00000125912	1008.93	-0.364231	0.157744	-2.30901	0.0209431	0.163089
ENSG00000226049	154.465	-0.364165	0.169174	-2.1526	0.03135	0.198072
ENSG00000197780	253.507	-0.363865	0.158259	-2.29917	0.0214952	0.164396
ENSG00000109586	1277.42	-0.363845	0.120573	-3.01763	0.0025476	0.0499885
ENSG00000124615	293.732	-0.363537	0.140678	-2.58419	0.00976079	0.107218
ENSG00000106305	322.66	-0.363488	0.167118	-2.17504	0.0296272	0.192473
ENSG00000124787	110.653	-0.363349	0.190057	-1.91179	0.0559032	0.264577
ENSG00000234383	30.3222	-0.36316	0.231604	-1.56802	0.116876	0.384389
ENSG00000178896	138.739	-0.363122	0.191134	-1.89983	0.0574551	0.267781
ENSG00000161671	663.086	-0.362853	0.160141	-2.26584	0.023461	0.171849
ENSG00000176994	237.776	-0.362812	0.155692	-2.33031	0.0197896	0.158776
ENSG00000129932	111.332	-0.362729	0.203152	-1.7855	0.0741798	0.30373
ENSG00000067840	1707.98	-0.362716	0.162253	-2.23549	0.025385	0.178752
ENSG00000169184	186.944	-0.36256	0.155999	-2.32411	0.0201197	0.160388
ENSG00000079999	761.583	-0.362538	0.157333	-2.30428	0.0212071	0.163615
ENSG00000123444	68.289	-0.362503	0.202186	-1.79292	0.0729855	0.301342
ENSG00000064490	211.973	-0.362196	0.180384	-2.00792	0.0446523	0.234591
ENSG00000181135	108.42	-0.361877	0.193366	-1.87146	0.0612809	0.275139
ENSG00000070814	3225.24	-0.361387	0.115818	-3.1203	0.00180667	0.0411445
ENSG00000186493	27.6877	-0.361016	0.23268	-1.55155	0.120769	0.390543
ENSG00000117318	1089.57	-0.360963	0.156891	-2.30072	0.0214074	0.164356
ENSG00000250046	22.1095	-0.360955	0.23387	-1.5434	0.122733	0.39436
ENSG00000163584	823.937	-0.360705	0.162863	-2.21477	0.026776	0.18319
ENSG00000106351	45.6961	-0.360515	0.219274	-1.64413	0.100149	0.355547
ENSG00000186312	95.3082	-0.360511	0.198031	-1.82048	0.0686853	0.292437
ENSG00000168872	694.667	-0.360358	0.129331	-2.78633	0.00533091	0.077748
ENSG00000171456	398.306	-0.360183	0.157451	-2.2876	0.022161	0.166949
ENSG00000146094	42.2058	-0.360108	0.232082	-1.55164	0.120748	0.390543
ENSG00000165458	925.81	-0.360069	0.11813	-3.04807	0.00230313	0.0471083
ENSG00000177468	5.87791	-0.360008	0.195216	-1.84415	0.0651614	NA
ENSG00000249115	237.332	-0.359941	0.152978	-2.35289	0.018628	0.153651
ENSG00000000003	1100.39	-0.359912	0.12149	-2.96247	0.00305182	0.0556601
ENSG00000078596	186.352	-0.359867	0.15469	-2.32638	0.0199985	0.159806
ENSG00000197959	31.5954	-0.359566	0.231252	-1.55487	0.119978	0.389147
ENSG00000115649	367.593	-0.359535	0.157764	-2.27894	0.0226705	0.169337
ENSG00000196544	35.5073	-0.359396	0.227624	-1.5789	0.114358	0.380384
ENSG00000178921	2208.89	-0.359391	0.133862	-2.68478	0.00725772	0.0920025
ENSG00000196177	297.389	-0.359348	0.159944	-2.24671	0.0246588	0.176152
ENSG00000172530	145.803	-0.358897	0.170866	-2.10045	0.0356889	0.210691
ENSG00000140905	19.2945	-0.358809	0.233906	-1.53399	0.125033	0.397577
ENSG00000120948	2886.19	-0.358445	0.134808	-2.65893	0.00783881	0.0955788
ENSG00000177971	502.345	-0.358318	0.147977	-2.42144	0.015459	0.138462
ENSG00000129422	62.0286	-0.357795	0.211038	-1.69541	0.0899978	0.336119
ENSG00000104626	312.653	-0.357774	0.148405	-2.4108	0.0159174	0.140508
ENSG00000226180	11.9844	-0.357585	0.220054	-1.62498	0.104166	NA
ENSG00000163714	2197.8	-0.357329	0.145437	-2.45693	0.0140131	0.1311
ENSG00000197785	358.898	-0.357303	0.17076	-2.09243	0.0364005	0.212663
ENSG00000149554	1281.37	-0.357092	0.111997	-3.1884	0.00143063	0.0354012
ENSG00000138629	668.977	-0.35675	0.135035	-2.64191	0.00824409	0.0981207
ENSG00000143479	65.2917	-0.356227	0.201248	-1.77009	0.0767126	0.308868
ENSG00000187189	390.496	-0.356184	0.172103	-2.0696	0.0384902	0.217875
ENSG00000168564	225.245	-0.356131	0.163052	-2.18416	0.0289503	0.191191
ENSG00000167797	300.363	-0.356131	0.156431	-2.2766	0.0228099	0.169869
ENSG00000175274	690.946	-0.356085	0.147879	-2.40794	0.0160427	0.141353
ENSG00000196338	321.456	-0.356014	0.135404	-2.62927	0.00855692	0.100151
ENSG00000101361	3266.81	-0.355811	0.135366	-2.62851	0.00857604	0.100291
ENSG00000004478	3173.87	-0.355792	0.0982921	-3.61974	0.0002949	0.0128685
ENSG00000111196	227.765	-0.355717	0.169352	-2.10046	0.0356883	0.210691
ENSG00000101846	35.5325	-0.355472	0.229977	-1.54568	0.122181	0.393534
ENSG00000182541	629.891	-0.355295	0.124543	-2.85279	0.00433377	0.0682928
ENSG00000119720	125.55	-0.355154	0.175662	-2.02181	0.0431962	0.230415
ENSG00000100664	3089.06	-0.355112	0.165163	-2.15007	0.03155	0.198456
ENSG00000189298	114.036	-0.355076	0.180071	-1.97187	0.0486248	0.244834
ENSG00000112983	676.501	-0.355048	0.131038	-2.7095	0.00673846	0.0883092
ENSG00000110497	448.691	-0.355043	0.13223	-2.68503	0.00725228	0.0920025
ENSG00000133997	243.99	-0.354994	0.154278	-2.301	0.0213916	0.164356
ENSG00000232559	56.8434	-0.354837	0.215603	-1.64579	0.0998069	0.354869
ENSG00000164535	273.969	-0.354744	0.159083	-2.22993	0.0257522	0.179919
ENSG00000270172	51.577	-0.35471	0.224829	-1.57769	0.114637	0.380679
ENSG00000120029	277.283	-0.354448	0.139006	-2.54987	0.0107763	0.113827
ENSG00000146576	195.091	-0.354148	0.158198	-2.23864	0.0251794	0.178154
ENSG00000141013	42.7737	-0.354052	0.220934	-1.60252	0.10904	0.370931
ENSG00000188486	1022.64	-0.353651	0.153547	-2.30321	0.0212672	0.163985
ENSG00000029153	165.839	-0.353494	0.168877	-2.0932	0.036331	0.212345
ENSG00000115241	2577.03	-0.353475	0.123439	-2.86355	0.00418922	0.0671213
ENSG00000107290	972.474	-0.353474	0.119426	-2.95979	0.0030785	0.0560742
ENSG00000179542	85.9492	-0.353327	0.187253	-1.8869	0.0591741	0.270921
ENSG00000188070	340.663	-0.353186	0.160506	-2.20046	0.0277746	0.186389
ENSG00000188112	843.171	-0.353142	0.132157	-2.67214	0.007537	0.0936171
ENSG00000011376	933.892	-0.353005	0.122446	-2.88295	0.00393971	0.0651197
ENSG00000182973	516.876	-0.352957	0.135651	-2.60194	0.00926968	0.104313
ENSG00000099940	145.326	-0.35254	0.165491	-2.13027	0.0331496	0.204176
ENSG00000251247	52.7053	-0.352531	0.213349	-1.65237	0.09846	0.352514
ENSG00000197457	859.365	-0.352408	0.151119	-2.332	0.019701	0.158508
ENSG00000169641	1266.95	-0.352325	0.114421	-3.07919	0.00207561	0.0445309
ENSG00000186019	9.34391	-0.352306	0.220744	-1.59599	0.110491	NA
ENSG00000103742	238.602	-0.352168	0.148289	-2.37487	0.0175551	0.147982
ENSG00000204381	45.0162	-0.352135	0.219572	-1.60373	0.108773	0.370769
ENSG00000067113	176.95	-0.352074	0.173244	-2.03224	0.0421296	0.228236
ENSG00000137168	1356.9	-0.351977	0.118353	-2.97396	0.00293986	0.0547821
ENSG00000166689	189.382	-0.351907	0.157382	-2.23601	0.0253512	0.178752
ENSG00000169217	856.189	-0.351823	0.129426	-2.71833	0.00656128	0.0869131
ENSG00000144229	29.3029	-0.351465	0.231416	-1.51876	0.128824	0.404129
ENSG00000112320	49.3839	-0.3514	0.218232	-1.61022	0.107351	0.368209
ENSG00000148459	116.297	-0.351395	0.203085	-1.73029	0.0835783	0.323292
ENSG00000005882	92.1904	-0.351185	0.187973	-1.86827	0.0617243	0.27627
ENSG00000132953	1246.76	-0.351079	0.103431	-3.39433	0.000687979	0.0223712
ENSG00000103044	801.41	-0.350095	0.233922	-1.49663	0.134489	0.41336
ENSG00000119004	118.023	-0.350086	0.186167	-1.8805	0.0600403	0.273051
ENSG00000101413	428.674	-0.349869	0.143889	-2.43152	0.0150357	0.136144
ENSG00000100058	127.648	-0.34953	0.183593	-1.90383	0.0569328	0.266849
ENSG00000211445	324.278	-0.349368	0.166805	-2.09447	0.0362179	0.212213
ENSG00000092068	3676.33	-0.349285	0.112671	-3.10004	0.00193497	0.0427028
ENSG00000184178	121.59	-0.349274	0.184207	-1.89609	0.0579481	0.269188
ENSG00000197283	7.84276	-0.349104	0.213336	-1.6364	0.101755	NA
ENSG00000133107	301.234	-0.348965	0.15156	-2.30249	0.0213076	0.16412
ENSG00000123636	355.411	-0.348834	0.143384	-2.43287	0.0149796	0.13581
ENSG00000197852	218.086	-0.348771	0.156154	-2.23351	0.0255151	0.178911
ENSG00000171649	595.75	-0.348579	0.13528	-2.57673	0.00997397	0.108527
ENSG00000110172	694.09	-0.348441	0.142642	-2.44277	0.014575	0.133813
ENSG00000152661	13080.1	-0.348418	0.10922	-3.19006	0.00142243	0.0353838
ENSG00000070614	1292.24	-0.347925	0.136274	-2.55313	0.0106761	0.113448
ENSG00000153721	108.686	-0.347742	0.190368	-1.82668	0.0677478	0.290681
ENSG00000261373	67.8892	-0.347686	0.204648	-1.69895	0.0893286	0.334544
ENSG00000250899	479.764	-0.347609	0.185963	-1.86924	0.0615896	0.276085
ENSG00000133302	307.727	-0.347567	0.136648	-2.54353	0.010974	0.115395
ENSG00000269343	344.364	-0.347349	0.16217	-2.14188	0.0322031	0.200451
ENSG00000211455	835.036	-0.347248	0.120645	-2.87827	0.00399867	0.0660038
ENSG00000138600	180.68	-0.34706	0.170394	-2.0368	0.0416697	0.226982
ENSG00000157216	1048.48	-0.346732	0.112901	-3.07113	0.00213253	0.0449492
ENSG00000148824	21.4548	-0.346613	0.233938	-1.48164	0.138435	0.420532
ENSG00000120697	194.867	-0.346523	0.155315	-2.23109	0.0256752	0.179586
ENSG00000134901	226.192	-0.346314	0.158998	-2.17811	0.0293979	0.191986
ENSG00000143375	1015.57	-0.346141	0.136413	-2.53745	0.0111663	0.115984
ENSG00000095261	413.539	-0.346134	0.148834	-2.32563	0.0200383	0.160033
ENSG00000100294	104.418	-0.345839	0.208049	-1.6623	0.0964532	0.348767
ENSG00000165501	252.773	-0.34568	0.164407	-2.10259	0.0355016	0.210509
ENSG00000100425	467.639	-0.345447	0.125177	-2.75967	0.005786	0.0811396
ENSG00000089195	339.989	-0.345422	0.147102	-2.34818	0.0188654	0.154703
ENSG00000159023	1843.01	-0.345263	0.102967	-3.35314	0.000799004	0.0249999
ENSG00000183527	627.252	-0.345225	0.157069	-2.19792	0.0279546	0.186926
ENSG00000273290	183.485	-0.345175	0.175727	-1.96427	0.049499	0.247319
ENSG00000215452	27.0162	-0.345153	0.230944	-1.49453	0.135037	0.414051
ENSG00000166716	699.815	-0.345145	0.138061	-2.49995	0.0124212	0.122817
ENSG00000166451	340.739	-0.345143	0.159326	-2.16627	0.0302903	0.194565
ENSG00000064989	69.941	-0.345035	0.210272	-1.64089	0.10082	0.356758
ENSG00000143633	108.027	-0.344746	0.180634	-1.90853	0.0563224	0.265448
ENSG00000179115	898.669	-0.344571	0.144438	-2.3856	0.0170511	0.146212
ENSG00000107021	423.978	-0.344452	0.149484	-2.30427	0.0212072	0.163615
ENSG00000012048	590.65	-0.344346	0.135499	-2.54131	0.0110437	0.115596
ENSG00000171453	227.622	-0.344315	0.166565	-2.06715	0.0387199	0.21842
ENSG00000125630	1002.59	-0.344204	0.138425	-2.48657	0.012898	0.124046
ENSG00000138092	418.657	-0.344173	0.137852	-2.49668	0.0125361	0.123007
ENSG00000135956	443.848	-0.344137	0.158053	-2.17735	0.0294546	0.192001
ENSG00000197261	59.4233	-0.34359	0.220379	-1.55909	0.118976	0.387414
ENSG00000232019	4.21384	-0.343547	0.166497	-2.06338	0.0390767	NA
ENSG00000151746	312.548	-0.34354	0.140738	-2.44099	0.0146472	0.134178
ENSG00000185813	302.637	-0.343467	0.154205	-2.22735	0.0259241	0.180542
ENSG00000144824	459.569	-0.343021	0.178118	-1.92581	0.0541276	0.260375
ENSG00000177646	264.102	-0.342896	0.151334	-2.26582	0.0234624	0.171849
ENSG00000198722	1079.37	-0.342843	0.107274	-3.19594	0.00139375	0.0352317
ENSG00000007062	1109.69	-0.342804	0.128197	-2.67405	0.0074942	0.0934617
ENSG00000186272	54.0168	-0.342803	0.229243	-1.49537	0.134818	0.413813
ENSG00000180318	12.93	-0.342787	0.229298	-1.49494	0.134929	NA
ENSG00000141522	720.454	-0.342738	0.146782	-2.33501	0.019543	0.157735
ENSG00000224722	32.85	-0.342592	0.226465	-1.51278	0.130336	0.406812
ENSG00000133119	846.554	-0.342582	0.124666	-2.74799	0.00599615	0.0829329
ENSG00000256771	435.409	-0.34251	0.131634	-2.60198	0.00926872	0.104313
ENSG00000167528	64.4804	-0.342459	0.211545	-1.61885	0.10548	0.364907
ENSG00000130560	539.214	-0.342397	0.126164	-2.71392	0.00664931	0.0874743
ENSG00000105771	209.465	-0.341867	0.153633	-2.22522	0.0260664	0.180815
ENSG00000166508	4789.99	-0.341783	0.119395	-2.86262	0.00420159	0.0671213
ENSG00000133316	408.481	-0.34177	0.163558	-2.0896	0.0366538	0.213301
ENSG00000118420	120.325	-0.341744	0.189261	-1.80567	0.0709694	0.297116
ENSG00000135999	332.308	-0.341624	0.149503	-2.28506	0.0223093	0.167617
ENSG00000170561	291.661	-0.341603	0.233907	-1.46042	0.144175	0.429443
ENSG00000198768	47.0789	-0.341529	0.221978	-1.53857	0.123909	0.396418
ENSG00000233225	274.142	-0.341359	0.144836	-2.35687	0.0184299	0.152618
ENSG00000198301	709.496	-0.340784	0.12821	-2.65803	0.00785998	0.0956019
ENSG00000080824	23639	-0.340714	0.102656	-3.31898	0.000903465	0.0270348
ENSG00000152433	13.1646	-0.340674	0.229522	-1.48428	0.137736	0.419312
ENSG00000185344	555.802	-0.340625	0.143001	-2.38198	0.0172199	0.146854
ENSG00000128805	60.9946	-0.340571	0.213979	-1.59161	0.111473	0.376298
ENSG00000263179	67.1806	-0.340465	0.207125	-1.64377	0.100224	0.355722
ENSG00000126804	408.529	-0.340334	0.164689	-2.06652	0.0387793	0.21858
ENSG00000132561	175.589	-0.340325	0.165592	-2.0552	0.03986	0.222127
ENSG00000104853	826.976	-0.340214	0.138716	-2.4526	0.014183	0.132074
ENSG00000148204	71.908	-0.340019	0.207951	-1.63509	0.10203	0.359054
ENSG00000085491	804.801	-0.340002	0.141532	-2.40229	0.0162928	0.142919
ENSG00000198744	74.2996	-0.339871	0.195243	-1.74076	0.081726	0.319139
ENSG00000117528	404.678	-0.339834	0.135756	-2.50327	0.0123053	0.122105
ENSG00000222011	27.9068	-0.33981	0.232742	-1.46003	0.144282	0.42959
ENSG00000148019	513.491	-0.339734	0.150903	-2.25135	0.0243636	0.174881
ENSG00000162344	158.098	-0.339678	0.208341	-1.6304	0.103018	0.36046
ENSG00000100014	356.855	-0.339525	0.135468	-2.50631	0.0122	0.121654
ENSG00000116584	735.55	-0.339481	0.120883	-2.80835	0.00497967	0.0745098
ENSG00000221823	475.704	-0.339186	0.152388	-2.22581	0.0260268	0.180709
ENSG00000116161	1174.59	-0.339028	0.114298	-2.96617	0.0030153	0.0552086
ENSG00000185220	66.9123	-0.338815	0.210966	-1.60602	0.108269	0.370343
ENSG00000254858	263.602	-0.3388	0.166254	-2.03785	0.0415654	0.226838
ENSG00000066735	564.35	-0.338609	0.177046	-1.91254	0.0558066	0.264475
ENSG00000109184	573.28	-0.338012	0.147531	-2.29113	0.0219558	0.166203
ENSG00000143294	829.509	-0.337884	0.125824	-2.68538	0.00724476	0.0920025
ENSG00000115211	425.594	-0.337855	0.168466	-2.00548	0.0449117	0.235515
ENSG00000142556	414.802	-0.337735	0.148729	-2.27081	0.0231587	0.171157
ENSG00000185515	298.948	-0.337691	0.151458	-2.2296	0.0257739	0.179919
ENSG00000087258	434.172	-0.337603	0.128794	-2.62126	0.00876043	0.101353
ENSG00000105699	1568.73	-0.337542	0.14245	-2.36955	0.0178098	0.149138
ENSG00000169813	4685.34	-0.337529	0.130025	-2.59587	0.00943526	0.105102
ENSG00000198246	149.045	-0.337187	0.166808	-2.02141	0.0432372	0.230511
ENSG00000131116	78.0686	-0.337123	0.201021	-1.67705	0.0935321	0.343146
ENSG00000272711	47.4843	-0.337119	0.218653	-1.54179	0.123124	0.395166
ENSG00000166261	427.443	-0.337106	0.135696	-2.48427	0.0129818	0.124276
ENSG00000171223	31.1885	-0.337095	0.229787	-1.46699	0.142379	0.426079
ENSG00000140650	169.357	-0.33696	0.168431	-2.00058	0.0454377	0.236936
ENSG00000147059	19.1058	-0.33687	0.227577	-1.48024	0.138808	0.421029
ENSG00000177370	313.665	-0.336858	0.163204	-2.06404	0.0390144	0.219115
ENSG00000099954	2087.55	-0.336856	0.101607	-3.31528	0.000915501	0.0271654
ENSG00000072756	317.761	-0.33683	0.158142	-2.12993	0.0331776	0.204259
ENSG00000102100	213.93	-0.336703	0.18105	-1.85973	0.0629241	0.279222
ENSG00000239672	722.746	-0.3365	0.159969	-2.10353	0.0354197	0.210224
ENSG00000176410	43.7381	-0.336445	0.222801	-1.51006	0.131027	0.407704
ENSG00000101811	354.857	-0.336168	0.144654	-2.32395	0.0201282	0.160388
ENSG00000103197	643.961	-0.336034	0.125236	-2.6832	0.00729215	0.0920269
ENSG00000133313	2288.69	-0.336005	0.129363	-2.59739	0.00939366	0.10497
ENSG00000182872	836.508	-0.335981	0.117351	-2.86305	0.00419584	0.0671213
ENSG00000155393	289.988	-0.335754	0.154812	-2.16878	0.0300995	0.194048
ENSG00000035141	1387.23	-0.335709	0.139909	-2.39948	0.0164185	0.143307
ENSG00000121207	274.148	-0.335627	0.203133	-1.65225	0.0984843	0.352514
ENSG00000198677	866.223	-0.335501	0.127973	-2.62166	0.00875024	0.101319
ENSG00000133124	87.426	-0.33549	0.196209	-1.70986	0.0872914	0.330066
ENSG00000101138	535.291	-0.335457	0.12694	-2.64264	0.00822636	0.0979925
ENSG00000147383	421.707	-0.33545	0.145957	-2.29827	0.0215462	0.164689
ENSG00000065361	993.704	-0.335402	0.110708	-3.02959	0.00244883	0.0489072
ENSG00000088986	2197.32	-0.33509	0.114571	-2.92475	0.00344738	0.0597947
ENSG00000229186	22.0501	-0.334985	0.233837	-1.43256	0.151984	0.440924
ENSG00000010610	56.4799	-0.33493	0.211965	-1.58012	0.11408	0.379728
ENSG00000100109	320.079	-0.334827	0.155424	-2.15428	0.0312184	0.19797
ENSG00000122643	158.523	-0.33481	0.174744	-1.91601	0.0553642	0.263559
ENSG00000248329	727.667	-0.334784	0.158979	-2.10584	0.0352183	0.209644
ENSG00000171204	504.238	-0.334747	0.164665	-2.0329	0.0420628	0.227962
ENSG00000017483	420.764	-0.334589	0.233578	-1.43245	0.152016	0.440924
ENSG00000263244	240.973	-0.334169	0.174719	-1.91261	0.0557976	0.264475
ENSG00000085840	924.221	-0.334165	0.138831	-2.40699	0.0160846	0.141518
ENSG00000271020	5.06792	-0.333981	0.188422	-1.77251	0.0763096	NA
ENSG00000118961	365.522	-0.33397	0.150016	-2.22623	0.0259987	0.180709
ENSG00000137460	557.841	-0.333905	0.175219	-1.90565	0.0566962	0.266183
ENSG00000126709	29.9584	-0.333815	0.228705	-1.45959	0.144403	0.429708
ENSG00000172428	250.783	-0.333555	0.15289	-2.18167	0.0291339	0.191648
ENSG00000108826	336.639	-0.333486	0.168464	-1.97957	0.0477522	0.242407
ENSG00000266876	7.49331	-0.333164	0.209819	-1.58786	0.112317	NA
ENSG00000128606	42.6801	-0.332993	0.233893	-1.4237	0.154534	0.443754
ENSG00000149054	188.041	-0.332977	0.159026	-2.09385	0.0362738	0.212263
ENSG00000135324	54.2215	-0.33286	0.216421	-1.53802	0.124044	0.396759
ENSG00000261409	87.2728	-0.332815	0.192793	-1.72628	0.0842962	0.32482
ENSG00000135775	437.658	-0.33275	0.150265	-2.21442	0.0267998	0.183207
ENSG00000172409	279.461	-0.332633	0.158864	-2.09382	0.0362759	0.212263
ENSG00000070413	1088.66	-0.332619	0.136861	-2.43034	0.0150847	0.136412
ENSG00000165684	239.026	-0.332581	0.184194	-1.8056	0.0709806	0.297116
ENSG00000196235	1367.1	-0.332482	0.12654	-2.6275	0.00860161	0.100507
ENSG00000131089	467.31	-0.332424	0.126128	-2.6356	0.00839874	0.0990405
ENSG00000124233	38.3341	-0.332381	0.226574	-1.46699	0.142379	0.426079
ENSG00000159423	338.635	-0.33223	0.130069	-2.55425	0.0106415	0.113387
ENSG00000105939	908.33	-0.332196	0.125385	-2.6494	0.00806354	0.0968982
ENSG00000132361	1000.94	-0.332103	0.157338	-2.11076	0.0347927	0.208577
ENSG00000129654	61.4309	-0.331732	0.232117	-1.42916	0.152958	0.44157
ENSG00000108654	5190.62	-0.331596	0.140131	-2.36633	0.0179652	0.15003
ENSG00000086589	475.244	-0.331545	0.128278	-2.58458	0.00974981	0.107218
ENSG00000109084	1658.8	-0.331543	0.130486	-2.54083	0.0110589	0.115596
ENSG00000143368	1250.86	-0.331506	0.133431	-2.48448	0.0129741	0.124276
ENSG00000167461	259.74	-0.331482	0.145905	-2.27191	0.023092	0.170944
ENSG00000180771	87.6498	-0.331429	0.195026	-1.69941	0.0892413	0.334464
ENSG00000132846	148.596	-0.331176	0.166168	-1.99302	0.046259	0.238517
ENSG00000004139	47.137	-0.33115	0.220922	-1.49895	0.133887	0.412989
ENSG00000162769	857.261	-0.331093	0.142275	-2.32713	0.0199585	0.159668
ENSG00000030066	2550.85	-0.331003	0.127129	-2.60367	0.00922307	0.104193
ENSG00000169490	411.957	-0.330964	0.142459	-2.32322	0.0201674	0.160487
ENSG00000133169	535.315	-0.330839	0.140337	-2.35746	0.0184002	0.152487
ENSG00000152520	443.737	-0.330522	0.151417	-2.18286	0.0290462	0.191439
ENSG00000183655	277.08	-0.330513	0.151164	-2.18645	0.0287825	0.19053
ENSG00000095574	203.061	-0.330356	0.161834	-2.04132	0.0412187	0.226295
ENSG00000104980	718.631	-0.330326	0.158455	-2.08467	0.0370997	0.214381
ENSG00000198954	557.731	-0.330293	0.136857	-2.41342	0.0158034	0.140033
ENSG00000161267	102.556	-0.330282	0.183073	-1.8041	0.0712156	0.297453
ENSG00000104312	208.499	-0.330189	0.155981	-2.11685	0.0342727	0.207196
ENSG00000141076	1146.19	-0.33009	0.149369	-2.20989	0.0271125	0.183708
ENSG00000106588	99.7725	-0.33006	0.194219	-1.69943	0.0892391	0.334464
ENSG00000159322	423.554	-0.330006	0.145969	-2.2608	0.0237717	0.172796
ENSG00000116874	133.132	-0.32985	0.171278	-1.92582	0.0541271	0.260375
ENSG00000159164	982.689	-0.329739	0.132072	-2.49667	0.0125366	0.123007
ENSG00000226544	17.4175	-0.329615	0.233027	-1.41449	0.157217	0.447919
ENSG00000125037	293.027	-0.329556	0.160864	-2.04866	0.0404955	0.224472
ENSG00000120885	2009.79	-0.329536	0.142256	-2.31649	0.0205313	0.161769
ENSG00000198719	21.24	-0.329536	0.233939	-1.40864	0.158941	0.450693
ENSG00000112996	733.493	-0.32941	0.113769	-2.89542	0.00378648	0.0633178
ENSG00000104131	955.409	-0.329226	0.127432	-2.58354	0.00977927	0.107218
ENSG00000088888	306.909	-0.329166	0.151507	-2.17261	0.0298096	0.192887
ENSG00000119541	532.171	-0.329151	0.130844	-2.5156	0.011883	0.119938
ENSG00000014216	1566.75	-0.328955	0.104401	-3.15089	0.00162775	0.038685
ENSG00000115053	17967.6	-0.328873	0.118636	-2.77211	0.00556949	0.0792392
ENSG00000175764	5.50248	-0.328715	0.194599	-1.68919	0.0911834	NA
ENSG00000170860	777.074	-0.328682	0.134201	-2.44918	0.014318	0.13298
ENSG00000129749	5.41765	-0.328658	0.176397	-1.86317	0.0624389	NA
ENSG00000136819	524.752	-0.328134	0.139726	-2.34842	0.0188535	0.154695
ENSG00000157851	264.035	-0.328085	0.181808	-1.80457	0.0711425	0.297413
ENSG00000271936	16.7281	-0.327992	0.232886	-1.40838	0.159019	0.450693
ENSG00000137055	960.639	-0.327707	0.131202	-2.49772	0.0124994	0.123007
ENSG00000102699	732.184	-0.327673	0.123637	-2.65029	0.00804238	0.0968663
ENSG00000066629	282.468	-0.327581	0.165886	-1.97473	0.0482986	0.244181
ENSG00000126775	329.621	-0.327259	0.153769	-2.12826	0.0333158	0.204841
ENSG00000143756	684.968	-0.327188	0.134244	-2.43726	0.0147989	0.134874
ENSG00000084676	316.009	-0.32717	0.142522	-2.29558	0.0217	0.165373
ENSG00000126883	769.187	-0.327088	0.111767	-2.92651	0.00342786	0.0597947
ENSG00000108424	7698.12	-0.327062	0.117775	-2.77701	0.00548608	0.0789003
ENSG00000198093	583.662	-0.327007	0.131482	-2.48709	0.0128792	0.123955
ENSG00000163964	120.162	-0.326898	0.170468	-1.91765	0.0551555	0.262925
ENSG00000120314	264.635	-0.32689	0.154443	-2.11657	0.0342963	0.207198
ENSG00000155755	378.645	-0.326773	0.180239	-1.813	0.0698312	0.29476
ENSG00000112149	70.4228	-0.326511	0.197938	-1.64956	0.0990334	0.353457
ENSG00000156239	117.985	-0.326057	0.173006	-1.88466	0.0594761	0.271466
ENSG00000143126	738.039	-0.32602	0.128291	-2.54125	0.0110456	0.115596
ENSG00000184967	277.579	-0.325995	0.167305	-1.94851	0.0513541	0.252493
ENSG00000106992	21.2595	-0.325929	0.233581	-1.39536	0.162908	0.457103
ENSG00000215319	19.4112	-0.325822	0.233897	-1.39301	0.163616	0.458362
ENSG00000188997	34.0566	-0.325805	0.231159	-1.40944	0.158704	0.450693
ENSG00000112739	1111.03	-0.325386	0.14616	-2.22623	0.025999	0.180709
ENSG00000105705	306.55	-0.325292	0.149249	-2.17952	0.0292928	0.191648
ENSG00000163633	42.597	-0.325249	0.22157	-1.46793	0.142123	0.425826
ENSG00000111802	737.713	-0.325095	0.125493	-2.59054	0.00958256	0.106071
ENSG00000148399	266.901	-0.32508	0.166379	-1.95385	0.0507184	0.250391
ENSG00000144792	158.923	-0.324961	0.184546	-1.76087	0.0782606	0.31217
ENSG00000164032	5114.21	-0.324865	0.128461	-2.5289	0.0114421	0.117766
ENSG00000112118	5876.65	-0.324693	0.116935	-2.77668	0.00549164	0.0789003
ENSG00000103657	581.069	-0.324686	0.128249	-2.53168	0.0113518	0.1173
ENSG00000134369	889.878	-0.324596	0.125239	-2.59182	0.00954711	0.105928
ENSG00000180611	337.384	-0.324592	0.178049	-1.82306	0.068295	0.291337
ENSG00000205571	15.739	-0.324535	0.231302	-1.40308	0.160594	0.45323
ENSG00000159618	120.385	-0.324349	0.185255	-1.75082	0.0799767	0.315483
ENSG00000111684	469.416	-0.324263	0.140996	-2.29981	0.0214591	0.164356
ENSG00000174607	486.007	-0.32416	0.11979	-2.70606	0.00680858	0.0885996
ENSG00000152782	528.37	-0.324104	0.130517	-2.48323	0.0130197	0.124367
ENSG00000112763	139.577	-0.324026	0.17562	-1.84504	0.0650319	0.285304
ENSG00000204147	51.4916	-0.323986	0.211434	-1.53233	0.125442	0.398247
ENSG00000151465	1324.68	-0.323959	0.125985	-2.57142	0.0101283	0.109529
ENSG00000268912	19.2408	-0.323916	0.233226	-1.38885	0.164878	0.459426
ENSG00000169718	465.11	-0.323778	0.146185	-2.21485	0.0267706	0.18319
ENSG00000114529	134.409	-0.3237	0.184807	-1.75156	0.0798503	0.315388
ENSG00000160593	6.38421	-0.323619	0.186938	-1.73116	0.083424	NA
ENSG00000137073	975.124	-0.323571	0.116347	-2.78108	0.00541792	0.0786436
ENSG00000204524	35.829	-0.32351	0.224803	-1.43908	0.150128	0.438639
ENSG00000118496	813.082	-0.323255	0.117908	-2.74159	0.00611424	0.0836632
ENSG00000244045	69.0097	-0.323203	0.205359	-1.57385	0.115523	0.382207
ENSG00000104177	783.543	-0.323179	0.122894	-2.62975	0.00854486	0.100093
ENSG00000132388	1864.8	-0.323071	0.111265	-2.90361	0.00368886	0.062054
ENSG00000107443	754.74	-0.323045	0.133757	-2.41516	0.0157282	0.13963
ENSG00000129282	88.6786	-0.32303	0.194123	-1.66405	0.0961018	0.348051
ENSG00000130177	939.852	-0.322961	0.146362	-2.2066	0.0273424	0.184672
ENSG00000075702	563.243	-0.322953	0.144894	-2.2289	0.0258204	0.180155
ENSG00000117461	308.569	-0.322903	0.149606	-2.15836	0.0309	0.196776
ENSG00000128699	387.988	-0.322871	0.139319	-2.31749	0.0204772	0.161687
ENSG00000136271	663.463	-0.322561	0.149759	-2.15387	0.0312506	0.198023
ENSG00000171723	163.656	-0.322441	0.173029	-1.86351	0.0623899	0.27773
ENSG00000261061	64.7947	-0.322254	0.209819	-1.53587	0.12457	0.397271
ENSG00000106443	726.774	-0.32221	0.139079	-2.31674	0.020518	0.161755
ENSG00000198960	96.2765	-0.322162	0.197289	-1.63295	0.10248	0.359652
ENSG00000053900	352.051	-0.322089	0.155906	-2.06592	0.0388359	0.218636
ENSG00000164076	680.283	-0.321973	0.13999	-2.29998	0.0214493	0.164356
ENSG00000105671	375.696	-0.321916	0.149731	-2.14996	0.0315584	0.198456
ENSG00000091157	238.211	-0.321833	0.157181	-2.04754	0.0406052	0.224822
ENSG00000181359	62.3363	-0.321782	0.20587	-1.56303	0.118044	0.38604
ENSG00000138246	703.886	-0.321732	0.13759	-2.33834	0.0193697	0.15719
ENSG00000128512	299.824	-0.321669	0.159968	-2.01084	0.0443428	0.233999
ENSG00000196418	151.706	-0.321663	0.174059	-1.84801	0.0646013	0.284335
ENSG00000101898	21.8134	-0.321634	0.23392	-1.37498	0.169139	0.464044
ENSG00000225531	6.45767	-0.321421	0.203801	-1.57713	0.114765	NA
ENSG00000100092	204.392	-0.321242	0.157038	-2.04564	0.0407921	0.225413
ENSG00000130768	586.298	-0.321206	0.161148	-1.99324	0.046235	0.238517
ENSG00000125485	304.661	-0.321001	0.143075	-2.24359	0.0248589	0.176864
ENSG00000151422	174.079	-0.320444	0.18321	-1.74906	0.0802814	0.316182
ENSG00000174173	657.903	-0.320394	0.143946	-2.22579	0.0260282	0.180709
ENSG00000134569	337.256	-0.320298	0.148236	-2.16072	0.0307167	0.19623
ENSG00000198900	2028.44	-0.320176	0.101172	-3.16466	0.00155262	0.037428
ENSG00000155329	293.793	-0.320088	0.149699	-2.13821	0.0324995	0.201583
ENSG00000143093	449.952	-0.319951	0.130848	-2.44522	0.0144764	0.133544
ENSG00000141002	461.52	-0.319926	0.151756	-2.10816	0.0350171	0.209359
ENSG00000105443	264.556	-0.319785	0.154378	-2.07144	0.0383176	0.217495
ENSG00000080189	432.354	-0.319727	0.135433	-2.36078	0.0182368	0.151221
ENSG00000263013	9.57168	-0.319529	0.218488	-1.46245	0.143618	NA
ENSG00000089091	98.0266	-0.319515	0.189505	-1.68605	0.0917866	0.339884
ENSG00000035681	356.974	-0.319499	0.146803	-2.17638	0.0295268	0.192115
ENSG00000138660	344.246	-0.319496	0.154863	-2.0631	0.0391035	0.219291
ENSG00000131153	573.912	-0.319206	0.13754	-2.32083	0.0202962	0.16127
ENSG00000263846	19.9267	-0.319125	0.233928	-1.3642	0.172505	0.467753
ENSG00000100439	621.744	-0.319039	0.130026	-2.45365	0.0141414	0.131862
ENSG00000134996	95.3846	-0.319016	0.193881	-1.64542	0.0998823	0.354983
ENSG00000215301	5389.04	-0.31901	0.134812	-2.36634	0.0179651	0.15003
ENSG00000167118	410.677	-0.318772	0.144525	-2.20565	0.0274083	0.184818
ENSG00000167637	37.0242	-0.31868	0.231215	-1.37828	0.168116	0.463011
ENSG00000197024	726.053	-0.318636	0.14485	-2.19977	0.0278232	0.186519
ENSG00000068078	198.415	-0.318494	0.194376	-1.63854	0.101308	0.357947
ENSG00000237943	162.34	-0.318462	0.160282	-1.98689	0.0469344	0.239955
ENSG00000116237	2515.95	-0.318389	0.11464	-2.7773	0.00548133	0.0789003
ENSG00000228592	461.064	-0.318366	0.182409	-1.74534	0.0809263	0.316952
ENSG00000248632	79.1433	-0.318137	0.206554	-1.54021	0.123508	0.395676
ENSG00000215193	684.837	-0.318136	0.130977	-2.42895	0.0151426	0.136432
ENSG00000184831	196.976	-0.318096	0.160934	-1.97656	0.0480914	0.243571
ENSG00000186594	8.52866	-0.318007	0.200667	-1.58475	0.113023	NA
ENSG00000109472	140.934	-0.31795	0.177255	-1.79374	0.0728541	0.30117
ENSG00000090924	517.676	-0.317792	0.124525	-2.55204	0.0107095	0.113703
ENSG00000178935	97.9916	-0.31774	0.184734	-1.71998	0.0854356	0.326907
ENSG00000177613	837.924	-0.317684	0.12093	-2.62701	0.00861394	0.100567
ENSG00000155438	579.379	-0.317621	0.15254	-2.08222	0.0373224	0.214756
ENSG00000115556	25.3118	-0.317568	0.233628	-1.35929	0.174055	0.468943
ENSG00000167447	343.127	-0.317292	0.142024	-2.23408	0.0254777	0.178776
ENSG00000185869	99.8475	-0.317284	0.184697	-1.71786	0.0858225	0.327551
ENSG00000150907	916.788	-0.317241	0.128636	-2.46619	0.0136558	0.128611
ENSG00000128656	473.008	-0.317215	0.164522	-1.9281	0.053843	0.259688
ENSG00000136950	424.003	-0.317	0.157447	-2.01338	0.0440745	0.233034
ENSG00000124207	5792.73	-0.316873	0.115422	-2.74534	0.00604476	0.0832091
ENSG00000170549	21.8362	-0.316825	0.227545	-1.39236	0.163813	0.458637
ENSG00000106003	215.853	-0.316731	0.163036	-1.94271	0.0520515	0.254659
ENSG00000166341	382.885	-0.316689	0.147729	-2.14371	0.0320558	0.199862
ENSG00000144589	226.898	-0.316589	0.156273	-2.02587	0.0427781	0.229717
ENSG00000234241	175.849	-0.316443	0.168116	-1.88229	0.0597963	0.272294
ENSG00000102103	357.766	-0.316222	0.158063	-2.00061	0.045434	0.236936
ENSG00000161011	400.634	-0.31618	0.137083	-2.30649	0.0210832	0.163195
ENSG00000115419	633.268	-0.31616	0.14876	-2.1253	0.0335619	0.205457
ENSG00000001084	605.8	-0.315973	0.141615	-2.2312	0.0256676	0.179586
ENSG00000167981	21.4159	-0.31593	0.23393	-1.35053	0.176846	0.472934
ENSG00000083814	80.8743	-0.315732	0.203727	-1.54978	0.121195	0.391381
ENSG00000177542	474.145	-0.315604	0.168337	-1.87484	0.0608146	0.274231
ENSG00000100823	3631.98	-0.31557	0.121652	-2.59403	0.00948581	0.105498
ENSG00000159915	18.9096	-0.315457	0.233694	-1.34987	0.177056	0.473308
ENSG00000236753	29.8187	-0.315245	0.229552	-1.37331	0.169657	0.464433
ENSG00000164815	325.295	-0.315117	0.157881	-1.99592	0.0459426	0.23771
ENSG00000242802	163.313	-0.314949	0.210078	-1.49921	0.13382	0.412989
ENSG00000004866	178.411	-0.314639	0.172226	-1.82689	0.0677157	0.290681
ENSG00000141084	261.525	-0.314604	0.162198	-1.93962	0.0524254	0.255769
ENSG00000182704	372.317	-0.314556	0.16079	-1.95632	0.0504274	0.250094
ENSG00000254339	329.015	-0.314511	0.140732	-2.23482	0.0254289	0.178752
ENSG00000128849	1456.27	-0.314489	0.10813	-2.90843	0.00363249	0.0613255
ENSG00000126953	192.78	-0.314478	0.172788	-1.82003	0.068755	0.292645
ENSG00000196159	83.7336	-0.314447	0.208419	-1.50872	0.131369	0.408228
ENSG00000162188	5.89232	-0.314352	0.191165	-1.6444	0.100094	NA
ENSG00000075292	1905.56	-0.31433	0.119721	-2.62552	0.00865163	0.100638
ENSG00000062598	357.488	-0.314322	0.13314	-2.36084	0.0182333	0.151221
ENSG00000160584	443.843	-0.314233	0.125588	-2.50209	0.0123462	0.122319
ENSG00000170727	59.6431	-0.314197	0.220352	-1.42589	0.153901	0.443202
ENSG00000112312	794.004	-0.314189	0.144219	-2.17856	0.0293647	0.191858
ENSG00000257122	19.6693	-0.314078	0.233406	-1.34563	0.178421	0.474915
ENSG00000131061	82.5572	-0.314075	0.197159	-1.59301	0.111159	0.37561
ENSG00000169116	116.35	-0.314029	0.192134	-1.63443	0.102169	0.359277
ENSG00000128641	1306.07	-0.313951	0.129208	-2.42982	0.0151065	0.136432
ENSG00000053770	488.33	-0.313723	0.139601	-2.24729	0.0246216	0.176065
ENSG00000198783	165.64	-0.313636	0.159125	-1.97101	0.0487227	0.244834
ENSG00000259456	8.15256	-0.313464	0.215842	-1.45228	0.146422	NA
ENSG00000110696	2026.52	-0.313425	0.1262	-2.48356	0.0130076	0.124336
ENSG00000138399	571.93	-0.313403	0.147563	-2.12387	0.0336814	0.205647
ENSG00000110768	280.125	-0.313296	0.174034	-1.8002	0.0718295	0.2986
ENSG00000197345	420.189	-0.31321	0.157444	-1.98935	0.046663	0.239437
ENSG00000139438	13.508	-0.313106	0.225045	-1.39131	0.164132	0.458936
ENSG00000096717	1099.05	-0.3131	0.122442	-2.55713	0.010554	0.112757
ENSG00000143393	419.438	-0.313065	0.138412	-2.26183	0.0237079	0.172567
ENSG00000148143	923.408	-0.313064	0.12834	-2.43934	0.0147143	0.134443
ENSG00000142686	108.332	-0.313061	0.189706	-1.65024	0.0988939	0.353139
ENSG00000125149	227.62	-0.313054	0.144845	-2.1613	0.0306721	0.196034
ENSG00000172766	404.537	-0.31287	0.130578	-2.39605	0.016573	0.144212
ENSG00000121101	25.8519	-0.312824	0.23306	-1.34224	0.179517	0.476427
ENSG00000140992	229.204	-0.312594	0.169376	-1.84556	0.0649554	0.285269
ENSG00000158816	13.8625	-0.312552	0.229528	-1.36172	0.173287	0.468565
ENSG00000232186	22.4378	-0.312437	0.233924	-1.33564	0.181668	0.479443
ENSG00000174606	525.407	-0.31242	0.120266	-2.59773	0.00938416	0.104967
ENSG00000172661	153.573	-0.312358	0.162292	-1.92466	0.0542715	0.260687
ENSG00000145041	668.21	-0.312226	0.134871	-2.315	0.020613	0.162055
ENSG00000131845	194.295	-0.311765	0.164947	-1.89009	0.0587458	0.270661
ENSG00000139737	362.581	-0.311682	0.130885	-2.38135	0.0172495	0.146929
ENSG00000188566	211.202	-0.311642	0.172554	-1.80606	0.0709086	0.297073
ENSG00000105127	410.533	-0.311595	0.149061	-2.09039	0.0365827	0.213301
ENSG00000063180	532.257	-0.311558	0.14582	-2.1366	0.0326307	0.202129
ENSG00000197037	221.712	-0.311551	0.165928	-1.87763	0.0604319	0.273537
ENSG00000174442	1131.34	-0.311459	0.124312	-2.50546	0.0122292	0.121773
ENSG00000121022	468.777	-0.311417	0.145064	-2.14676	0.0318126	0.199014
ENSG00000111877	150.702	-0.311345	0.178649	-1.74277	0.0813738	0.318173
ENSG00000163507	566.515	-0.311311	0.149445	-2.08312	0.03724	0.214708
ENSG00000146476	844.053	-0.311177	0.134168	-2.3193	0.0203788	0.161653
ENSG00000065548	1002.21	-0.311046	0.137531	-2.26164	0.0237195	0.172567
ENSG00000121579	2811.46	-0.310872	0.103708	-2.99756	0.00272148	0.0522761
ENSG00000066279	1184.9	-0.310624	0.121535	-2.55584	0.010593	0.113078
ENSG00000006715	608.428	-0.310602	0.133284	-2.33037	0.0197867	0.158776
ENSG00000138115	5.62478	-0.310551	0.19601	-1.58437	0.113111	NA
ENSG00000178381	97.075	-0.310352	0.205637	-1.50922	0.131242	0.408012
ENSG00000187772	2454.99	-0.310292	0.111351	-2.78661	0.0053263	0.077748
ENSG00000162399	5.50095	-0.310288	0.195033	-1.59095	0.11162	NA
ENSG00000136279	370.04	-0.310055	0.140316	-2.20969	0.0271267	0.183715
ENSG00000136875	719.081	-0.309962	0.126549	-2.44935	0.0143114	0.13298
ENSG00000073969	308.514	-0.309803	0.137098	-2.25973	0.0238382	0.173011
ENSG00000186971	4.17702	-0.309785	0.17693	-1.7509	0.0799639	NA
ENSG00000118298	700.527	-0.309419	0.126029	-2.45514	0.0140828	0.131542
ENSG00000235884	27.6887	-0.309382	0.232497	-1.33069	0.18329	0.481216
ENSG00000173166	74.0947	-0.309223	0.197098	-1.56888	0.116676	0.384036
ENSG00000138741	5.99106	-0.3092	0.195287	-1.58331	0.11335	NA
ENSG00000124444	94.7016	-0.309195	0.193088	-1.60132	0.109306	0.371477
ENSG00000005812	188.708	-0.30898	0.158423	-1.95035	0.0511349	0.251829
ENSG00000124749	37.9798	-0.308972	0.223658	-1.38145	0.167142	0.462077
ENSG00000067646	107.351	-0.308959	0.193832	-1.59395	0.110947	0.375243
ENSG00000122958	663.647	-0.308902	0.140956	-2.19148	0.0284173	0.188912
ENSG00000139620	385.956	-0.30889	0.150904	-2.04693	0.0406647	0.224894
ENSG00000051180	412.789	-0.30876	0.142839	-2.1616	0.0306489	0.195975
ENSG00000161681	14.0471	-0.308756	0.229504	-1.34532	0.178523	0.475033
ENSG00000165338	196.225	-0.308652	0.182729	-1.68912	0.0911956	0.338527
ENSG00000057757	683.247	-0.308646	0.141742	-2.17752	0.029442	0.192001
ENSG00000135476	720.122	-0.308348	0.142541	-2.16322	0.0305243	0.195533
ENSG00000101311	337.311	-0.308345	0.156925	-1.96491	0.0494241	0.247121
ENSG00000114405	70.8435	-0.308211	0.202676	-1.52071	0.128332	0.403234
ENSG00000176896	30.2919	-0.308182	0.228796	-1.34698	0.177988	0.474844
ENSG00000142396	36.6632	-0.308151	0.230079	-1.33933	0.180465	0.47789
ENSG00000163528	234.158	-0.308151	0.163229	-1.88784	0.0590474	0.270874
ENSG00000137842	14.3544	-0.308098	0.231121	-1.33306	0.182513	0.480064
ENSG00000134444	463.383	-0.308022	0.132182	-2.33029	0.0197907	0.158776
ENSG00000197798	509.795	-0.307942	0.133633	-2.30438	0.0212013	0.163615
ENSG00000183876	38.179	-0.30794	0.222835	-1.38192	0.166996	0.461946
ENSG00000141540	53.5607	-0.307899	0.217758	-1.41395	0.157376	0.448009
ENSG00000145050	730.784	-0.307814	0.129121	-2.38393	0.0171291	0.146434
ENSG00000198176	1294.19	-0.307644	0.151621	-2.02903	0.0424551	0.22925
ENSG00000113593	431.412	-0.307262	0.132034	-2.32715	0.0199572	0.159668
ENSG00000117262	45.0274	-0.307226	0.224097	-1.37095	0.170391	0.465032
ENSG00000177628	103.008	-0.306989	0.189329	-1.62146	0.10492	0.363859
ENSG00000181090	1420.7	-0.306882	0.112128	-2.73689	0.00620232	0.0839699
ENSG00000111602	1588.19	-0.306822	0.109075	-2.81294	0.00490903	0.0737816
ENSG00000179958	593.909	-0.306652	0.16043	-1.91144	0.0559483	0.264627
ENSG00000133980	2525.98	-0.306524	0.116743	-2.62562	0.00864917	0.100638
ENSG00000100714	2868.89	-0.306419	0.131246	-2.33468	0.01956	0.157735
ENSG00000136888	1034.45	-0.306311	0.145369	-2.10712	0.0351069	0.209451
ENSG00000128833	346.566	-0.306198	0.177897	-1.72121	0.0852125	0.32683
ENSG00000214552	64.0286	-0.306184	0.207954	-1.47236	0.140923	0.423559
ENSG00000185722	767.501	-0.306157	0.12888	-2.37552	0.0175244	0.147982
ENSG00000109066	314.47	-0.3059	0.165237	-1.85128	0.0641295	0.283143
ENSG00000130204	1406.32	-0.305711	0.146177	-2.09137	0.0364947	0.213125
ENSG00000162642	289.719	-0.305538	0.147698	-2.06867	0.0385766	0.218065
ENSG00000264885	55.0198	-0.305424	0.225177	-1.35637	0.174981	0.470358
ENSG00000118418	1048.42	-0.305347	0.119875	-2.54722	0.0108585	0.114608
ENSG00000116688	1173.59	-0.305335	0.125412	-2.43466	0.0149057	0.135483
ENSG00000180198	1550.46	-0.305316	0.140015	-2.18059	0.0292136	0.191648
ENSG00000108270	676.544	-0.305295	0.12929	-2.36132	0.0182099	0.151221
ENSG00000134900	1431.75	-0.305294	0.113932	-2.67961	0.00737073	0.0926607
ENSG00000070010	368.341	-0.305092	0.159148	-1.91704	0.0552329	0.263174
ENSG00000106591	601.957	-0.304992	0.140241	-2.17477	0.0296471	0.192473
ENSG00000159166	374.125	-0.304743	0.140164	-2.17419	0.0296911	0.192473
ENSG00000269962	64.5277	-0.30474	0.208966	-1.45833	0.14475	0.430498
ENSG00000160208	1944.05	-0.304607	0.122071	-2.49533	0.0125839	0.123114
ENSG00000115884	675.035	-0.304581	0.131721	-2.31232	0.0207599	0.162562
ENSG00000143748	401.034	-0.304442	0.157749	-1.92991	0.0536175	0.259228
ENSG00000183853	677.259	-0.304411	0.141308	-2.15424	0.0312212	0.19797
ENSG00000108064	1439.11	-0.304371	0.121413	-2.5069	0.0121795	0.121536
ENSG00000111875	392.041	-0.304333	0.141396	-2.15234	0.0313708	0.198072
ENSG00000162627	215.065	-0.304291	0.154395	-1.97085	0.0487407	0.244834
ENSG00000122386	102.977	-0.304278	0.187935	-1.61906	0.105433	0.364907
ENSG00000156256	266.074	-0.304182	0.15014	-2.02599	0.0427655	0.229717
ENSG00000158526	544.705	-0.304139	0.137902	-2.20547	0.0274209	0.184818
ENSG00000085415	910.148	-0.304113	0.12385	-2.4555	0.0140687	0.131532
ENSG00000261589	9.5499	-0.304036	0.221064	-1.37533	0.169029	NA
ENSG00000140153	236.967	-0.303851	0.162287	-1.87231	0.0611642	0.274892
ENSG00000141012	129.831	-0.303731	0.168559	-1.80192	0.0715574	0.298085
ENSG00000122085	253.405	-0.303695	0.14074	-2.15784	0.03094	0.196942
ENSG00000198885	120.127	-0.303689	0.1973	-1.53923	0.123749	0.396088
ENSG00000108848	1174.28	-0.303539	0.117927	-2.57396	0.0100543	0.109054
ENSG00000165259	94.581	-0.303418	0.193261	-1.56999	0.116418	0.38388
ENSG00000187676	95.1701	-0.303387	0.194871	-1.55686	0.119504	0.388228
ENSG00000176920	37.0062	-0.303386	0.223152	-1.35955	0.173973	0.468943
ENSG00000065029	247.862	-0.303337	0.152446	-1.9898	0.0466131	0.239356
ENSG00000144580	1267.49	-0.303307	0.128009	-2.36942	0.0178161	0.149138
ENSG00000140365	529.821	-0.303283	0.138945	-2.18275	0.0290541	0.191439
ENSG00000118596	23.0113	-0.303282	0.233876	-1.29676	0.194712	0.496478
ENSG00000013275	1254.69	-0.303268	0.138237	-2.19383	0.0282474	0.188316
ENSG00000077238	374.228	-0.30275	0.17484	-1.73158	0.0833479	0.32318
ENSG00000139187	37.1097	-0.302711	0.223002	-1.35743	0.174644	0.469899
ENSG00000056661	517.886	-0.302696	0.129069	-2.34523	0.0190154	0.155751
ENSG00000125484	1375.54	-0.302653	0.125104	-2.41921	0.0155542	0.13908
ENSG00000186283	289.189	-0.302619	0.143373	-2.11071	0.0347975	0.208577
ENSG00000128609	619.551	-0.302582	0.120418	-2.51276	0.0119792	0.120736
ENSG00000150527	5.93814	-0.302548	0.197834	-1.5293	0.126189	NA
ENSG00000028839	466.621	-0.302464	0.155574	-1.94418	0.0518743	0.254403
ENSG00000111361	499.663	-0.302386	0.126575	-2.38899	0.0168949	0.14559
ENSG00000124784	349.693	-0.302341	0.151815	-1.99151	0.0464245	0.238735
ENSG00000112685	789.008	-0.302315	0.116795	-2.58842	0.00964186	0.106393
ENSG00000165730	67.1115	-0.302199	0.21186	-1.42641	0.153749	0.443059
ENSG00000183044	164.281	-0.302167	0.175304	-1.72368	0.0847663	0.325562
ENSG00000132780	8962.2	-0.302115	0.119059	-2.53753	0.0111638	0.115984
ENSG00000162407	435.254	-0.302104	0.130588	-2.31341	0.0207001	0.162372
ENSG00000215251	380.002	-0.302084	0.156523	-1.92997	0.0536105	0.259228
ENSG00000139835	249.364	-0.302079	0.156377	-1.93174	0.0533919	0.258705
ENSG00000126106	60.3181	-0.301993	0.205185	-1.47181	0.141073	0.423742
ENSG00000139687	355.902	-0.30189	0.155944	-1.93588	0.0528822	0.2572
ENSG00000205978	624.671	-0.301887	0.120202	-2.51149	0.0120222	0.120909
ENSG00000168661	77.9305	-0.301852	0.199478	-1.5132	0.130228	0.406745
ENSG00000135083	495.199	-0.301838	0.129268	-2.33498	0.0195443	0.157735
ENSG00000161980	305.359	-0.301773	0.142258	-2.12131	0.0338955	0.205756
ENSG00000113595	188.301	-0.301684	0.162581	-1.85559	0.0635118	0.281121
ENSG00000231066	5.83306	-0.301614	0.19962	-1.51094	0.130804	NA
ENSG00000196693	206.65	-0.301613	0.172044	-1.75311	0.0795824	0.315034
ENSG00000146122	42.0167	-0.301574	0.219698	-1.37267	0.169854	0.464433
ENSG00000146233	19.3782	-0.301546	0.233932	-1.28904	0.197386	0.499865
ENSG00000130477	959.435	-0.301527	0.168464	-1.78986	0.0734762	0.302145
ENSG00000171497	580.642	-0.301462	0.124768	-2.41618	0.0156843	0.13957
ENSG00000170633	517.944	-0.301396	0.134293	-2.24432	0.0248119	0.176797
ENSG00000006712	378.709	-0.301365	0.161719	-1.86351	0.0623905	0.27773
ENSG00000034152	352.944	-0.301352	0.134817	-2.23527	0.0253997	0.178752
ENSG00000011304	5799.24	-0.301046	0.127092	-2.36872	0.0178496	0.14933
ENSG00000141582	16.0956	-0.300784	0.232964	-1.29112	0.196662	0.49892
ENSG00000172336	418.459	-0.300745	0.150025	-2.00463	0.0450021	0.235666
ENSG00000071243	175.966	-0.300677	0.165233	-1.81971	0.068803	0.292761
ENSG00000221955	167.516	-0.300637	0.164913	-1.823	0.0683029	0.291337
ENSG00000259051	127.345	-0.300578	0.17928	-1.67659	0.0936235	0.343146
ENSG00000101160	289.828	-0.300544	0.141289	-2.12716	0.0334068	0.20514
ENSG00000185418	163.432	-0.300524	0.158224	-1.89936	0.0575165	0.267979
ENSG00000153922	1001.05	-0.300381	0.111633	-2.69079	0.00712832	0.0911432
ENSG00000104611	82.0399	-0.300163	0.190196	-1.57818	0.114525	0.380656
ENSG00000256053	93.9558	-0.300158	0.18868	-1.59083	0.111647	0.376706
ENSG00000116406	239.489	-0.300153	0.159753	-1.87886	0.060264	0.273275
ENSG00000124635	13.675	-0.299888	0.229109	-1.30893	0.190557	0.49167
ENSG00000115274	73.2486	-0.299841	0.199144	-1.50565	0.132158	0.410135
ENSG00000160392	143.974	-0.299781	0.181113	-1.65521	0.0978814	0.351574
ENSG00000140931	280.474	-0.299764	0.140008	-2.14105	0.0322702	0.20077
ENSG00000124299	667.846	-0.299663	0.130732	-2.29219	0.0218944	0.166149
ENSG00000112110	490.637	-0.299485	0.133596	-2.24171	0.0249798	0.177187
ENSG00000152268	49.4085	-0.299343	0.219691	-1.36256	0.17302	0.46842
ENSG00000186197	36.1818	-0.299335	0.227915	-1.31336	0.18906	0.489793
ENSG00000188582	29.9359	-0.299207	0.230366	-1.29883	0.194001	0.495648
ENSG00000146955	18.5703	-0.299126	0.233585	-1.28059	0.200339	0.503411
ENSG00000145685	779.423	-0.299058	0.132566	-2.25592	0.0240754	0.173926
ENSG00000100056	189.714	-0.298763	0.163131	-1.83143	0.0670358	0.28882
ENSG00000184281	176.942	-0.298717	0.189121	-1.5795	0.114222	0.380109
ENSG00000172020	168.175	-0.298484	0.158505	-1.88312	0.0596844	0.27216
ENSG00000150967	31.0134	-0.29842	0.230835	-1.29278	0.196085	0.49825
ENSG00000112419	621.135	-0.298398	0.159287	-1.87334	0.0610217	0.274676
ENSG00000121152	716.858	-0.298277	0.136255	-2.18911	0.0285891	0.189653
ENSG00000179922	75.953	-0.298246	0.209396	-1.42432	0.154355	0.443534
ENSG00000106344	582.591	-0.298176	0.138745	-2.14908	0.0316277	0.198625
ENSG00000188985	285.941	-0.298102	0.141807	-2.10217	0.0355387	0.210511
ENSG00000250461	16.7102	-0.298067	0.232987	-1.27933	0.20078	0.50383
ENSG00000113580	99.0875	-0.297963	0.204565	-1.45657	0.145235	0.431195
ENSG00000152455	419.491	-0.297906	0.141026	-2.11242	0.0346505	0.208317
ENSG00000139842	1380	-0.297769	0.116082	-2.56515	0.010313	0.11093
ENSG00000267980	7.67175	-0.297742	0.207858	-1.43243	0.152021	NA
ENSG00000153956	423.77	-0.297544	0.149224	-1.99394	0.0461585	0.238412
ENSG00000090432	272.734	-0.297514	0.160023	-1.85919	0.0629999	0.27947
ENSG00000198026	195.61	-0.29734	0.169845	-1.75065	0.0800059	0.315483
ENSG00000110921	164.876	-0.297283	0.183477	-1.62027	0.105174	0.364463
ENSG00000184207	322.177	-0.29703	0.1579	-1.88113	0.0599548	0.272769
ENSG00000213337	45.4609	-0.296363	0.21854	-1.3561	0.175066	0.470457
ENSG00000121775	199.915	-0.296108	0.169443	-1.74753	0.0805453	0.316428
ENSG00000096401	1014.8	-0.295984	0.129362	-2.28802	0.0221361	0.166939
ENSG00000037474	1541.22	-0.295974	0.145487	-2.03437	0.0419147	0.227559
ENSG00000112584	234.773	-0.295941	0.151267	-1.95642	0.050416	0.250094
ENSG00000186141	308.105	-0.295785	0.153204	-1.93066	0.0535255	0.259071
ENSG00000163468	5815.33	-0.295516	0.108867	-2.71446	0.00663838	0.0874743
ENSG00000041802	704.34	-0.295461	0.142345	-2.07567	0.0379241	0.216552
ENSG00000179292	12.9881	-0.295286	0.224292	-1.31653	0.187997	NA
ENSG00000139200	117.582	-0.295177	0.178353	-1.65502	0.0979213	0.351628
ENSG00000155115	493.095	-0.295131	0.144515	-2.04222	0.0411296	0.226036
ENSG00000011009	1012.1	-0.295023	0.141235	-2.08887	0.0367194	0.213376
ENSG00000132613	118.308	-0.294941	0.183756	-1.60507	0.108479	0.370407
ENSG00000177352	297.549	-0.294936	0.14618	-2.01763	0.0436303	0.231642
ENSG00000153827	1907.62	-0.294923	0.114567	-2.57424	0.010046	0.109054
ENSG00000163904	717.557	-0.294814	0.1278	-2.30685	0.0210632	0.163142
ENSG00000108262	759.441	-0.294789	0.141709	-2.08024	0.0375036	0.215355
ENSG00000130558	391.219	-0.294667	0.130549	-2.25714	0.0239994	0.173644
ENSG00000183833	24.2685	-0.294618	0.233349	-1.26257	0.206745	0.512496
ENSG00000009954	1921.65	-0.294574	0.109305	-2.69497	0.00703949	0.0903518
ENSG00000145604	1151.13	-0.294551	0.14157	-2.0806	0.0374705	0.215253
ENSG00000164961	747.902	-0.294474	0.131025	-2.24746	0.0246107	0.176065
ENSG00000099381	610.501	-0.294455	0.140915	-2.08959	0.0366543	0.213301
ENSG00000164053	130.478	-0.294449	0.183875	-1.60136	0.109298	0.371477
ENSG00000151883	348.824	-0.294425	0.133436	-2.20649	0.0273495	0.184672
ENSG00000100379	209.082	-0.294413	0.149341	-1.97142	0.048676	0.244834
ENSG00000147416	925.101	-0.294317	0.123752	-2.37828	0.0173934	0.147584
ENSG00000116120	1069.87	-0.294301	0.136866	-2.15028	0.031533	0.198456
ENSG00000149557	459.389	-0.294284	0.188123	-1.56432	0.117742	0.385359
ENSG00000184226	7.40043	-0.294277	0.183819	-1.60091	0.109397	NA
ENSG00000182010	386.957	-0.294171	0.168792	-1.7428	0.0813687	0.318173
ENSG00000116649	1174.65	-0.294065	0.136601	-2.15273	0.0313402	0.198072
ENSG00000184887	122.991	-0.294004	0.177526	-1.65612	0.0976974	0.351398
ENSG00000188277	9.02193	-0.293886	0.217284	-1.35254	0.176202	NA
ENSG00000132357	6.42291	-0.293847	0.19706	-1.49116	0.135919	NA
ENSG00000184787	909.52	-0.293828	0.12835	-2.28926	0.0220643	0.166747
ENSG00000198736	279.642	-0.293826	0.141258	-2.08006	0.0375197	0.21536
ENSG00000100410	804.103	-0.293747	0.145382	-2.02052	0.043329	0.230651
ENSG00000114812	58.823	-0.293731	0.204804	-1.4342	0.151514	0.4408
ENSG00000140694	738.516	-0.293569	0.111152	-2.64115	0.00826253	0.0982571
ENSG00000164134	2119.87	-0.293477	0.120097	-2.44367	0.0145388	0.13362
ENSG00000112578	458.601	-0.29318	0.137731	-2.12864	0.0332839	0.204824
ENSG00000152128	11.4683	-0.293168	0.21627	-1.35557	0.175237	NA
ENSG00000091129	73.1463	-0.293088	0.217631	-1.34672	0.17807	0.474844
ENSG00000158234	69.5441	-0.292993	0.214738	-1.36442	0.172435	0.467724
ENSG00000074803	17.3038	-0.292956	0.232251	-1.26138	0.207173	0.512901
ENSG00000085999	486.597	-0.292763	0.126903	-2.30698	0.0210562	0.163142
ENSG00000167383	18.4706	-0.292761	0.232245	-1.26057	0.207462	0.513109
ENSG00000174776	9.1978	-0.292724	0.219659	-1.33263	0.182653	NA
ENSG00000010361	214.367	-0.292712	0.148514	-1.97094	0.0487302	0.244834
ENSG00000081059	106.904	-0.292565	0.186559	-1.56822	0.116831	0.384341
ENSG00000165806	48.6702	-0.29245	0.219532	-1.33215	0.182811	0.480669
ENSG00000102043	43.6169	-0.292424	0.223167	-1.31033	0.190083	0.491076
ENSG00000163959	33.4673	-0.292415	0.233005	-1.25497	0.209489	0.516388
ENSG00000196756	167.586	-0.292332	0.189122	-1.54574	0.122168	0.393534
ENSG00000112365	371.142	-0.292316	0.140136	-2.08595	0.0369832	0.21413
ENSG00000119285	2032.18	-0.292243	0.110268	-2.65031	0.00804179	0.0968663
ENSG00000079785	1963.91	-0.292097	0.11811	-2.47309	0.0133951	0.126835
ENSG00000081721	197.498	-0.292058	0.160762	-1.81671	0.0692609	0.293822
ENSG00000136237	159.21	-0.291977	0.166681	-1.75171	0.0798238	0.315388
ENSG00000134755	703.462	-0.291935	0.112228	-2.60126	0.0092883	0.104313
ENSG00000073008	134.045	-0.291847	0.193334	-1.50955	0.131158	0.407882
ENSG00000123610	5.68935	-0.291605	0.179079	-1.62836	0.103448	NA
ENSG00000137872	61.6429	-0.291527	0.224755	-1.29708	0.194602	0.496466
ENSG00000111737	553.219	-0.291512	0.157657	-1.84903	0.0644535	0.284106
ENSG00000172172	596.538	-0.291433	0.134171	-2.1721	0.0298482	0.193
ENSG00000101407	932.572	-0.291415	0.107731	-2.70504	0.0068296	0.0887092
ENSG00000143514	696.729	-0.291415	0.112433	-2.59191	0.00954455	0.105928
ENSG00000172301	288.243	-0.291313	0.143691	-2.02736	0.0426255	0.229717
ENSG00000115946	540.652	-0.291044	0.153737	-1.89312	0.0583414	0.269762
ENSG00000105983	734.828	-0.290936	0.132066	-2.20297	0.0275971	0.185651
ENSG00000160949	530.13	-0.29069	0.128393	-2.26406	0.0235704	0.172328
ENSG00000183431	2202.88	-0.290399	0.113864	-2.5504	0.0107601	0.113827
ENSG00000033100	195.124	-0.290398	0.188921	-1.53714	0.124259	0.397086
ENSG00000175606	200.714	-0.290236	0.182884	-1.587	0.112513	0.377353
ENSG00000083828	160.42	-0.290231	0.168788	-1.71949	0.0855243	0.326957
ENSG00000005100	1400.94	-0.29023	0.129971	-2.23304	0.0255463	0.17904
ENSG00000237176	27.552	-0.290227	0.232254	-1.24961	0.211442	0.517918
ENSG00000074047	432.017	-0.290098	0.12461	-2.32804	0.0199098	0.15946
ENSG00000172554	48.7198	-0.290051	0.215623	-1.34518	0.178569	0.475033
ENSG00000186017	179.439	-0.289973	0.168569	-1.7202	0.0853954	0.326907
ENSG00000107890	144.523	-0.289677	0.16697	-1.7349	0.0827587	0.321713
ENSG00000164889	589.658	-0.289637	0.131697	-2.19927	0.0278586	0.186519
ENSG00000189410	163.748	-0.289422	0.164952	-1.75458	0.0793314	0.314644
ENSG00000259485	28.0733	-0.289368	0.2301	-1.25757	0.208546	0.514895
ENSG00000184083	84.8989	-0.289316	0.187699	-1.54138	0.123223	0.3953
ENSG00000054118	2860.85	-0.289267	0.131974	-2.19185	0.0283905	0.188823
ENSG00000101670	124.563	-0.289192	0.184923	-1.56385	0.117853	0.385542
ENSG00000121210	469.62	-0.288973	0.130226	-2.21901	0.026486	0.182355
ENSG00000169905	424.373	-0.288908	0.12766	-2.26311	0.0236288	0.172328
ENSG00000138778	618.873	-0.288843	0.145481	-1.98543	0.0470966	0.240261
ENSG00000259151	2.41514	-0.288699	0.145873	-1.97911	0.0478035	NA
ENSG00000244119	13.7891	-0.28868	0.229894	-1.25571	0.209221	0.515907
ENSG00000248008	71.9431	-0.288614	0.204893	-1.40861	0.15895	0.450693
ENSG00000120458	120.785	-0.288585	0.204063	-1.41419	0.157305	0.447957
ENSG00000250492	17.341	-0.288455	0.233121	-1.23736	0.215953	0.522892
ENSG00000170632	279.057	-0.288432	0.137399	-2.09923	0.035797	0.210888
ENSG00000213839	47.138	-0.288374	0.224159	-1.28647	0.198279	0.501126
ENSG00000146938	1742.23	-0.288364	0.114371	-2.52131	0.0116919	0.118944
ENSG00000121067	321.429	-0.28807	0.142827	-2.01692	0.0437042	0.231859
ENSG00000165671	2962.18	-0.288027	0.110593	-2.60439	0.00920377	0.104088
ENSG00000065000	2327.57	-0.287985	0.120431	-2.39128	0.0167895	0.145296
ENSG00000015475	338.186	-0.287851	0.163046	-1.76546	0.0774869	0.310465
ENSG00000256628	9.98664	-0.287794	0.216252	-1.33083	0.183246	NA
ENSG00000217950	16.8446	-0.287701	0.233501	-1.23212	0.217906	0.525657
ENSG00000106012	48.7527	-0.287601	0.223957	-1.28418	0.199079	0.502068
ENSG00000213186	403.461	-0.287569	0.137061	-2.09812	0.0358948	0.211375
ENSG00000139372	628.965	-0.287566	0.147102	-1.95488	0.0505974	0.250391
ENSG00000169621	47.5741	-0.287552	0.217285	-1.32338	0.185707	0.485203
ENSG00000070061	844.831	-0.287445	0.116169	-2.47437	0.0133472	0.126501
ENSG00000214578	5.43548	-0.287414	0.192615	-1.49217	0.135655	NA
ENSG00000239306	1357.11	-0.287393	0.127319	-2.25727	0.0239913	0.173644
ENSG00000164985	6054.8	-0.287274	0.0967413	-2.9695	0.00298281	0.0548993
ENSG00000050327	114.745	-0.287269	0.187571	-1.53152	0.125641	0.398699
ENSG00000124608	271.662	-0.28724	0.136798	-2.09974	0.0357519	0.210764
ENSG00000077235	2309.01	-0.28715	0.108344	-2.65036	0.00804057	0.0968663
ENSG00000228002	44.2461	-0.287139	0.221092	-1.29874	0.194035	0.495648
ENSG00000120616	258.738	-0.287072	0.15307	-1.87543	0.0607336	0.274119
ENSG00000241973	429.282	-0.28699	0.13061	-2.1973	0.027999	0.186926
ENSG00000254277	125.004	-0.286933	0.176395	-1.62665	0.103811	0.361797
ENSG00000064393	561.708	-0.286926	0.124205	-2.3101	0.0208828	0.163075
ENSG00000228283	28.1695	-0.286785	0.22991	-1.24738	0.21226	0.518814
ENSG00000120942	358.748	-0.286625	0.169465	-1.69135	0.0907697	0.3381
ENSG00000130035	12.759	-0.286574	0.229974	-1.24612	0.212722	NA
ENSG00000138386	400.238	-0.286562	0.136418	-2.10063	0.0356737	0.210691
ENSG00000100462	931.5	-0.286533	0.134953	-2.1232	0.0337369	0.205647
ENSG00000139668	418.113	-0.286512	0.136214	-2.1034	0.0354305	0.210224
ENSG00000102580	425.148	-0.286449	0.133333	-2.14838	0.0316837	0.198711
ENSG00000071655	498.894	-0.286438	0.149444	-1.91669	0.055277	0.263295
ENSG00000100354	645.453	-0.286402	0.152798	-1.87439	0.0608769	0.274375
ENSG00000223612	25.1823	-0.285757	0.233446	-1.22408	0.220921	0.528736
ENSG00000176058	221.327	-0.285731	0.162893	-1.7541	0.0794136	0.314881
ENSG00000144802	182.372	-0.2855	0.166314	-1.71663	0.0860467	0.328108
ENSG00000261428	5.92253	-0.285446	0.190413	-1.49909	0.133849	NA
ENSG00000112308	1579.86	-0.285302	0.126156	-2.2615	0.023728	0.172567
ENSG00000162928	264.72	-0.285251	0.141932	-2.00976	0.0444563	0.234085
ENSG00000103496	202.062	-0.285221	0.161969	-1.76096	0.078245	0.31217
ENSG00000143401	2916.38	-0.285205	0.124246	-2.29549	0.0217051	0.165373
ENSG00000198908	346.574	-0.285191	0.137538	-2.07354	0.0381219	0.216959
ENSG00000198121	31.0895	-0.285141	0.228943	-1.24547	0.212959	0.519434
ENSG00000123297	289.854	-0.285125	0.148994	-1.91367	0.0556623	0.264326
ENSG00000189306	434.813	-0.285043	0.15614	-1.82556	0.0679168	0.290935
ENSG00000179943	166.362	-0.284954	0.169282	-1.68331	0.092315	0.340577
ENSG00000116544	115.863	-0.284931	0.178553	-1.59578	0.110538	0.374217
ENSG00000229204	185.499	-0.284876	0.159112	-1.79041	0.0733884	0.30196
ENSG00000101294	780.418	-0.28487	0.125846	-2.26364	0.0235961	0.172328
ENSG00000176973	15.5964	-0.284808	0.232352	-1.22576	0.220289	0.528123
ENSG00000112210	204.977	-0.284689	0.152054	-1.87228	0.0611674	0.274892
ENSG00000182687	11.1544	-0.284675	0.223404	-1.27426	0.202572	NA
ENSG00000147526	139.924	-0.284544	0.165282	-1.72157	0.0851477	0.32667
ENSG00000113441	66.3273	-0.284514	0.206724	-1.3763	0.168728	0.463439
ENSG00000171853	283.527	-0.284514	0.151309	-1.88034	0.0600614	0.273059
ENSG00000230397	9.49214	-0.284441	0.2212	-1.2859	0.198478	NA
ENSG00000149428	3807.16	-0.284194	0.119297	-2.38225	0.0172074	0.146854
ENSG00000178531	221.771	-0.284146	0.18517	-1.53451	0.124903	0.397433
ENSG00000250444	53.8037	-0.284052	0.208953	-1.35941	0.174018	0.468943
ENSG00000124541	573.822	-0.28404	0.171467	-1.65653	0.0976153	0.351335
ENSG00000203952	27.2048	-0.284013	0.232027	-1.22405	0.220934	0.528736
ENSG00000197771	1531.34	-0.283976	0.124524	-2.28049	0.0225784	0.168829
ENSG00000111371	5298.65	-0.283784	0.139335	-2.03671	0.0416795	0.226982
ENSG00000101343	509.72	-0.283696	0.120999	-2.34462	0.0190467	0.155917
ENSG00000160953	369.837	-0.283685	0.143558	-1.9761	0.0481435	0.243747
ENSG00000164011	226.768	-0.283564	0.146189	-1.93971	0.0524154	0.255769
ENSG00000165416	809.023	-0.283499	0.11873	-2.38777	0.0169511	0.145699
ENSG00000196584	299.499	-0.283489	0.15813	-1.79277	0.0730102	0.301342
ENSG00000185504	351.77	-0.283473	0.163516	-1.7336	0.0829883	0.322176
ENSG00000167670	1381.64	-0.283467	0.125251	-2.26319	0.0236239	0.172328
ENSG00000182791	6.49545	-0.28342	0.203398	-1.39343	0.163491	NA
ENSG00000167470	1630.59	-0.283332	0.144616	-1.9592	0.0500895	0.24912
ENSG00000183171	91.0044	-0.283288	0.201137	-1.40844	0.159002	0.450693
ENSG00000108176	21.0615	-0.283286	0.233657	-1.2124	0.225359	0.533465
ENSG00000170035	635.02	-0.283188	0.133412	-2.12265	0.0337828	0.205647
ENSG00000141401	609.43	-0.283161	0.13376	-2.11693	0.0342656	0.207196
ENSG00000142207	739.176	-0.283161	0.131593	-2.15179	0.0314142	0.198248
ENSG00000088179	908.296	-0.283119	0.121173	-2.33649	0.0194657	0.157531
ENSG00000135870	291.241	-0.283097	0.161816	-1.7495	0.0802051	0.315973
ENSG00000184992	336.694	-0.282818	0.14249	-1.98483	0.0471628	0.240425
ENSG00000156968	67.9504	-0.282711	0.203975	-1.38601	0.165745	0.460429
ENSG00000214513	6.19926	-0.282683	0.197377	-1.43219	0.152089	NA
ENSG00000107362	610.908	-0.28267	0.12543	-2.2536	0.0242211	0.174174
ENSG00000143257	7.26729	-0.282495	0.205953	-1.37165	0.170174	NA
ENSG00000161204	376.211	-0.282481	0.151213	-1.8681	0.0617486	0.27627
ENSG00000121864	352.121	-0.282448	0.139421	-2.02587	0.0427782	0.229717
ENSG00000160214	491.775	-0.282424	0.162313	-1.74	0.0818598	0.319364
ENSG00000219545	124.496	-0.282414	0.180798	-1.56204	0.118278	0.3864
ENSG00000111328	979.254	-0.282396	0.136956	-2.06194	0.0392132	0.219529
ENSG00000204531	11.641	-0.282383	0.222149	-1.27114	0.203678	NA
ENSG00000176387	293.992	-0.282232	0.141515	-1.99436	0.0461123	0.238348
ENSG00000079263	6.402	-0.282185	0.195582	-1.44279	0.149078	NA
ENSG00000126790	29.1318	-0.281949	0.230353	-1.22399	0.220958	0.528736
ENSG00000153914	572.981	-0.281949	0.129764	-2.17278	0.0297965	0.192887
ENSG00000106299	824.961	-0.281939	0.118682	-2.37559	0.017521	0.147982
ENSG00000174100	808.184	-0.281837	0.114246	-2.46693	0.0136278	0.128433
ENSG00000132330	88.7487	-0.281792	0.204826	-1.37576	0.168895	0.463623
ENSG00000133895	651.287	-0.281706	0.117989	-2.38757	0.0169603	0.145699
ENSG00000272841	18.8088	-0.2815	0.232489	-1.21081	0.225967	0.53397
ENSG00000130054	299.581	-0.28146	0.140699	-2.00045	0.0454521	0.236936
ENSG00000129518	320.469	-0.281342	0.137158	-2.05123	0.0402442	0.223526
ENSG00000241945	836.797	-0.281157	0.134075	-2.09702	0.0359922	0.211683
ENSG00000128928	864.208	-0.28109	0.126746	-2.21774	0.0265727	0.182509
ENSG00000090905	1677.89	-0.281059	0.106718	-2.63367	0.00844679	0.0993573
ENSG00000199102	11.6985	-0.281019	0.226826	-1.23892	0.215375	NA
ENSG00000003989	505.344	-0.281017	0.123189	-2.28118	0.0225377	0.168613
ENSG00000139163	670.802	-0.280999	0.143723	-1.95514	0.0505663	0.250391
ENSG00000105894	323.488	-0.280941	0.167573	-1.67653	0.093634	0.343146
ENSG00000125449	136.429	-0.280825	0.175204	-1.60284	0.108969	0.37078
ENSG00000258900	6.09594	-0.280746	0.202126	-1.38896	0.164844	NA
ENSG00000151498	680.292	-0.280686	0.142752	-1.96625	0.0492701	0.246701
ENSG00000181991	251.69	-0.280518	0.169944	-1.65064	0.0988115	0.352997
ENSG00000134802	118.05	-0.280509	0.175455	-1.59875	0.109875	0.372602
ENSG00000138297	533.651	-0.280457	0.150996	-1.85738	0.0632573	0.280259
ENSG00000182575	42.8495	-0.280354	0.221177	-1.26755	0.204957	0.510309
ENSG00000173928	23.7684	-0.280337	0.233904	-1.19852	0.230716	0.538453
ENSG00000074266	318.868	-0.280259	0.150544	-1.86164	0.0626542	0.278375
ENSG00000117748	933.74	-0.280156	0.111646	-2.50933	0.012096	0.121125
ENSG00000031823	787.447	-0.280136	0.134306	-2.0858	0.0369966	0.21413
ENSG00000172057	592.096	-0.280112	0.131783	-2.12556	0.0335401	0.205449
ENSG00000150756	82.1492	-0.27999	0.206735	-1.35434	0.175628	0.471409
ENSG00000187531	87.6204	-0.279943	0.196492	-1.4247	0.154243	0.443411
ENSG00000241258	370.89	-0.279938	0.1494	-1.87375	0.0609645	0.274594
ENSG00000204624	79.26	-0.279627	0.202552	-1.38052	0.167426	0.462295
ENSG00000168439	3617.65	-0.279578	0.0989759	-2.82471	0.00473237	0.0722971
ENSG00000262944	101.135	-0.279409	0.194926	-1.43341	0.151741	0.440924
ENSG00000125952	302.364	-0.279265	0.157964	-1.7679	0.0770784	0.309668
ENSG00000033030	403.774	-0.27921	0.146916	-1.90047	0.0573712	0.267656
ENSG00000164305	1237.57	-0.27916	0.127099	-2.1964	0.0280635	0.187267
ENSG00000180389	41.8357	-0.279072	0.221023	-1.26264	0.206719	0.512496
ENSG00000170315	2246.34	-0.27901	0.102377	-2.72531	0.00642408	0.0860577
ENSG00000176894	16.3913	-0.279002	0.230763	-1.20904	0.226648	0.534883
ENSG00000165916	1510.35	-0.278933	0.140271	-1.98853	0.0467532	0.239568
ENSG00000103194	1903.36	-0.278788	0.116174	-2.39974	0.0164065	0.143307
ENSG00000162063	701.198	-0.278706	0.123489	-2.25693	0.0240125	0.173649
ENSG00000117222	426.026	-0.278513	0.131275	-2.1216	0.0338713	0.205756
ENSG00000186026	24.2054	-0.278491	0.233033	-1.19507	0.232059	0.53953
ENSG00000148841	311.009	-0.278373	0.142376	-1.9552	0.0505593	0.250391
ENSG00000138162	622.351	-0.278323	0.132877	-2.09458	0.0362083	0.212213
ENSG00000127989	161.256	-0.278244	0.1632	-1.70493	0.0882073	0.331986
ENSG00000136021	595.538	-0.278228	0.135559	-2.05245	0.0401263	0.223047
ENSG00000154319	12.1548	-0.278177	0.224297	-1.24022	0.214895	NA
ENSG00000049323	645.097	-0.278088	0.129418	-2.14876	0.0316534	0.19866
ENSG00000187866	136.744	-0.278039	0.176887	-1.57185	0.115986	0.383173
ENSG00000006042	791.255	-0.278036	0.114168	-2.43532	0.0148787	0.135405
ENSG00000120833	258.227	-0.278011	0.202089	-1.37568	0.16892	0.463623
ENSG00000152484	451.961	-0.27801	0.123591	-2.24943	0.0244849	0.175534
ENSG00000184752	395.195	-0.277756	0.124281	-2.2349	0.0254237	0.178752
ENSG00000099995	2150.75	-0.277713	0.113642	-2.44375	0.0145354	0.13362
ENSG00000116044	483.294	-0.277658	0.129407	-2.14562	0.0319037	0.199115
ENSG00000103047	240.717	-0.277626	0.152832	-1.81654	0.0692881	0.293829
ENSG00000183580	282.384	-0.277572	0.147879	-1.87701	0.0605161	0.2738
ENSG00000170502	340.906	-0.277476	0.136584	-2.03154	0.0422007	0.228533
ENSG00000167491	1830.64	-0.277458	0.125463	-2.21146	0.0270039	0.18335
ENSG00000186205	474.167	-0.277329	0.148693	-1.86511	0.0621662	0.277109
ENSG00000057019	1229.64	-0.277183	0.107697	-2.57372	0.0100611	0.109054
ENSG00000072210	940.556	-0.277183	0.10616	-2.61099	0.00902795	0.103177
ENSG00000143569	3219.98	-0.277138	0.110823	-2.50072	0.0123942	0.122636
ENSG00000147100	488.5	-0.277096	0.13181	-2.10224	0.0355326	0.210511
ENSG00000166263	156.597	-0.277081	0.193539	-1.43165	0.152243	0.441157
ENSG00000058262	2432.89	-0.276965	0.128572	-2.15415	0.031228	0.19797
ENSG00000164048	1326.75	-0.276848	0.10107	-2.73917	0.00615936	0.0839699
ENSG00000115761	438.126	-0.276836	0.148177	-1.86827	0.0617241	0.27627
ENSG00000131174	902.086	-0.276617	0.114505	-2.41578	0.0157017	0.13957
ENSG00000113013	6411.09	-0.276598	0.119361	-2.31732	0.0204864	0.161687
ENSG00000180447	31.7288	-0.276563	0.233711	-1.18335	0.236669	0.544964
ENSG00000065154	1248.97	-0.276221	0.137671	-2.00639	0.0448147	0.235181
ENSG00000102755	1187.19	-0.276151	0.11618	-2.37693	0.0174574	0.147806
ENSG00000197302	241.42	-0.27612	0.145808	-1.89372	0.0582622	0.269612
ENSG00000226971	18.8317	-0.275992	0.233262	-1.18318	0.236737	0.544964
ENSG00000150667	10.0276	-0.275976	0.213515	-1.29254	0.196172	NA
ENSG00000122687	430.649	-0.275892	0.143282	-1.92552	0.0541641	0.260461
ENSG00000158636	476.685	-0.27589	0.126536	-2.18033	0.0292328	0.191648
ENSG00000182759	8.2805	-0.275729	0.215803	-1.27769	0.201358	NA
ENSG00000128708	924.736	-0.275541	0.13281	-2.0747	0.038014	0.216792
ENSG00000176406	226.365	-0.275514	0.172088	-1.601	0.109376	0.371626
ENSG00000125741	270.372	-0.27551	0.147551	-1.86722	0.0618707	0.276377
ENSG00000172818	25.6407	-0.275373	0.23363	-1.17867	0.238529	0.546718
ENSG00000143319	764.698	-0.275331	0.130595	-2.10827	0.0350073	0.209359
ENSG00000018610	166.363	-0.275312	0.163118	-1.68781	0.0914469	0.339103
ENSG00000148843	1866.72	-0.27524	0.115211	-2.389	0.0168944	0.14559
ENSG00000174574	3495.24	-0.275229	0.119806	-2.29729	0.0216022	0.164945
ENSG00000235790	4.64209	-0.275219	0.181121	-1.51953	0.128628	NA
ENSG00000168916	501.284	-0.27515	0.120874	-2.27633	0.0228262	0.169869
ENSG00000183908	30.4912	-0.275133	0.233306	-1.17928	0.238286	0.54634
ENSG00000036054	267.362	-0.275048	0.143255	-1.91998	0.05486	0.261752
ENSG00000197385	63.4004	-0.27499	0.207618	-1.3245	0.185336	0.484413
ENSG00000170419	4.10509	-0.274919	0.180257	-1.52515	0.127222	NA
ENSG00000176022	148.529	-0.274733	0.164985	-1.6652	0.0958727	0.347551
ENSG00000185129	35.7866	-0.27463	0.228428	-1.20226	0.229263	0.537646
ENSG00000120802	2979.47	-0.27461	0.110121	-2.49371	0.0126415	0.123178
ENSG00000136699	1267.92	-0.274529	0.13397	-2.04918	0.0404444	0.224372
ENSG00000136731	1704.11	-0.274519	0.113528	-2.41808	0.0156027	0.139307
ENSG00000112742	1073.06	-0.274498	0.12617	-2.17562	0.0295836	0.192396
ENSG00000148339	194.429	-0.274448	0.171096	-1.60406	0.108701	0.370673
ENSG00000140632	1149.41	-0.274341	0.118309	-2.31886	0.0204029	0.161687
ENSG00000166471	482.256	-0.2743	0.140615	-1.95071	0.0510916	0.251792
ENSG00000162688	492.58	-0.274261	0.137296	-1.99758	0.045762	0.23768
ENSG00000162694	744.452	-0.274258	0.12964	-2.11553	0.0343849	0.207518
ENSG00000131849	64.7357	-0.274236	0.201108	-1.36363	0.172685	0.468008
ENSG00000235651	33.0431	-0.274221	0.229041	-1.19726	0.231205	0.53883
ENSG00000164902	614.554	-0.27417	0.12317	-2.22595	0.0260174	0.180709
ENSG00000165092	14.1039	-0.274051	0.23167	-1.18294	0.236834	0.544964
ENSG00000183439	19.8549	-0.273894	0.233927	-1.17086	0.241657	0.549764
ENSG00000197841	107.444	-0.273833	0.186341	-1.46952	0.141691	0.425104
ENSG00000168411	1923.46	-0.273764	0.105041	-2.60626	0.00915361	0.103854
ENSG00000221909	115.746	-0.27363	0.17876	-1.53071	0.125841	0.398897
ENSG00000173436	114.205	-0.273425	0.178375	-1.53287	0.125309	0.398093
ENSG00000165480	756.414	-0.273419	0.121433	-2.25161	0.0243467	0.174881
ENSG00000188603	12.7806	-0.273393	0.224205	-1.21939	0.222696	NA
ENSG00000256594	19.2459	-0.273337	0.233853	-1.16884	0.242468	0.550442
ENSG00000070214	1576.13	-0.273239	0.11161	-2.44816	0.0143586	0.133024
ENSG00000165494	621.239	-0.273177	0.134656	-2.0287	0.0424885	0.22925
ENSG00000164265	39.9767	-0.27311	0.229617	-1.18941	0.234277	0.541527
ENSG00000250312	185.406	-0.273057	0.154563	-1.76664	0.0772893	0.310038
ENSG00000167306	141.717	-0.272957	0.169245	-1.61279	0.106789	0.367102
ENSG00000115875	3505.74	-0.272869	0.126329	-2.15999	0.0307735	0.196504
ENSG00000183586	29.4728	-0.272825	0.229172	-1.19048	0.233857	0.541297
ENSG00000101265	186.852	-0.272816	0.158236	-1.72411	0.0846874	0.325562
ENSG00000131931	175.671	-0.272737	0.164902	-1.65394	0.0981406	0.351966
ENSG00000187051	476.267	-0.272659	0.156046	-1.7473	0.0805846	0.316454
ENSG00000140265	521.957	-0.272654	0.130905	-2.08284	0.037266	0.214708
ENSG00000189184	645.092	-0.272289	0.161301	-1.68808	0.0913962	0.339101
ENSG00000198231	2045.61	-0.272198	0.128041	-2.12586	0.0335148	0.205437
ENSG00000111554	115.343	-0.272194	0.178683	-1.52334	0.127674	0.402248
ENSG00000167912	46.4538	-0.272087	0.225774	-1.20513	0.228154	0.536205
ENSG00000175305	44.0016	-0.271961	0.229903	-1.18294	0.236835	0.544964
ENSG00000065559	561.106	-0.271649	0.131143	-2.0714	0.0383214	0.217495
ENSG00000139233	179.294	-0.271601	0.183412	-1.48083	0.138653	0.420801
ENSG00000143013	726.875	-0.271565	0.123105	-2.20597	0.0273859	0.18476
ENSG00000198182	218.457	-0.271535	0.148971	-1.82274	0.0683424	0.291418
ENSG00000152092	147.844	-0.271517	0.166902	-1.6268	0.103779	0.361797
ENSG00000144579	243.232	-0.271507	0.142004	-1.91196	0.0558807	0.26456
ENSG00000124383	481.112	-0.271496	0.146851	-1.84878	0.0644892	0.284108
ENSG00000162517	431.041	-0.271411	0.13747	-1.97433	0.0483438	0.244322
ENSG00000092531	523.051	-0.271132	0.121001	-2.24074	0.025043	0.177456
ENSG00000236565	275.786	-0.271107	0.151841	-1.78547	0.0741853	0.30373
ENSG00000204967	51.4995	-0.271036	0.21805	-1.243	0.213868	0.52044
ENSG00000111319	1128.58	-0.271019	0.117757	-2.30151	0.0213625	0.164356
ENSG00000113810	1448.24	-0.270761	0.12336	-2.19488	0.028172	0.187903
ENSG00000101146	593.145	-0.270755	0.132574	-2.04229	0.0411224	0.226036
ENSG00000106028	1431.84	-0.270736	0.120113	-2.254	0.024196	0.174174
ENSG00000136982	687.494	-0.270683	0.130409	-2.07564	0.0379274	0.216552
ENSG00000122873	242.078	-0.27066	0.148171	-1.82667	0.0677489	0.290681
ENSG00000171791	53.4068	-0.270658	0.209773	-1.29024	0.196966	0.499511
ENSG00000172594	22.4994	-0.270658	0.233641	-1.15844	0.246686	0.554251
ENSG00000108433	172.28	-0.270588	0.184186	-1.4691	0.141806	0.42523
ENSG00000078142	442.847	-0.270553	0.151825	-1.782	0.074749	0.304886
ENSG00000186174	835.792	-0.270454	0.158504	-1.70629	0.0879535	0.331651
ENSG00000163125	737.079	-0.270387	0.118872	-2.27461	0.0229293	0.170008
ENSG00000149792	840.926	-0.270298	0.166411	-1.62429	0.104315	0.362835
ENSG00000196417	164.623	-0.270278	0.165481	-1.63329	0.102408	0.359612
ENSG00000105251	15.317	-0.270181	0.231805	-1.16556	0.243794	0.551686
ENSG00000038358	570.508	-0.270174	0.124242	-2.17458	0.0296617	0.192473
ENSG00000205213	1178.93	-0.27013	0.127816	-2.11343	0.0345639	0.208047
ENSG00000141744	13.4135	-0.270096	0.228586	-1.18159	0.237367	0.545368
ENSG00000180672	20.9981	-0.270016	0.233831	-1.15475	0.248194	0.555795
ENSG00000188636	672.121	-0.269964	0.139039	-1.94164	0.0521806	0.255094
ENSG00000268995	5.60789	-0.269896	0.196741	-1.37183	0.170116	NA
ENSG00000111845	655.705	-0.269695	0.156253	-1.72602	0.084344	0.324826
ENSG00000163002	540.325	-0.269695	0.137239	-1.96514	0.0493977	0.247121
ENSG00000116016	24.5757	-0.269586	0.23361	-1.154	0.2485	0.556085
ENSG00000204843	1888.29	-0.269582	0.11164	-2.41474	0.0157463	0.139687
ENSG00000237972	5.5261	-0.269536	0.195173	-1.38101	0.167275	NA
ENSG00000146410	104.278	-0.269391	0.180135	-1.4955	0.134785	0.413813
ENSG00000136110	1004.42	-0.269354	0.144293	-1.86671	0.0619419	0.276447
ENSG00000163867	92.2783	-0.269341	0.188078	-1.43207	0.152124	0.440924
ENSG00000131375	221.187	-0.269336	0.146048	-1.84416	0.0651596	0.285505
ENSG00000135945	349.194	-0.269282	0.146913	-1.83293	0.0668134	0.288654
ENSG00000089234	381.707	-0.269249	0.128375	-2.09736	0.0359616	0.21168
ENSG00000169282	26.9749	-0.269216	0.232463	-1.1581	0.246822	0.554251
ENSG00000127022	8044.31	-0.26912	0.117387	-2.29259	0.0218717	0.166102
ENSG00000118363	127.644	-0.269078	0.182772	-1.4722	0.140966	0.423559
ENSG00000167900	722.871	-0.269066	0.12915	-2.08337	0.0372179	0.214708
ENSG00000134853	18.2164	-0.268975	0.231897	-1.15989	0.246094	0.553765
ENSG00000213619	664.878	-0.268961	0.134128	-2.00525	0.0449361	0.235555
ENSG00000135148	451.831	-0.268901	0.129488	-2.07666	0.0378334	0.216423
ENSG00000153531	12.2556	-0.268884	0.226104	-1.18921	0.234358	NA
ENSG00000166348	569.234	-0.268714	0.119372	-2.25106	0.0243814	0.174881
ENSG00000103415	356.289	-0.268695	0.148816	-1.80556	0.0709872	0.297116
ENSG00000143183	522.072	-0.268535	0.147109	-1.82541	0.0679395	0.290935
ENSG00000011132	97.7263	-0.268507	0.187195	-1.43436	0.151468	0.4408
ENSG00000159079	179.348	-0.268479	0.167223	-1.60552	0.10838	0.370407
ENSG00000139180	76.879	-0.268412	0.196169	-1.36827	0.171228	0.466013
ENSG00000100722	946.34	-0.268407	0.117118	-2.29175	0.0219199	0.166149
ENSG00000165119	9840.31	-0.268368	0.126174	-2.12697	0.0334226	0.20514
ENSG00000103274	100.703	-0.268339	0.187351	-1.43228	0.152065	0.440924
ENSG00000100105	1170.14	-0.268305	0.127936	-2.09718	0.0359777	0.211683
ENSG00000198492	1681.81	-0.268291	0.118554	-2.26303	0.0236339	0.172328
ENSG00000100162	174.349	-0.26826	0.170517	-1.57322	0.115668	0.382426
ENSG00000177084	1319.3	-0.268245	0.109108	-2.45853	0.0139507	0.130689
ENSG00000162951	6.27943	-0.26819	0.201851	-1.32865	0.183962	NA
ENSG00000149262	313.122	-0.268107	0.139178	-1.92636	0.0540589	0.260222
ENSG00000171861	243.25	-0.268086	0.156251	-1.71574	0.0862091	0.328219
ENSG00000160714	839.088	-0.268071	0.129243	-2.07416	0.0380644	0.216807
ENSG00000231397	5.71419	-0.268022	0.19617	-1.36627	0.171853	NA
ENSG00000172262	439.939	-0.268019	0.145558	-1.84132	0.0655745	0.285952
ENSG00000171634	3014.2	-0.267904	0.0989051	-2.7087	0.00675478	0.0883897
ENSG00000228648	14.4174	-0.26775	0.231494	-1.15662	0.247428	0.555008
ENSG00000143799	8022.04	-0.267744	0.0915174	-2.92561	0.00343785	0.0597947
ENSG00000058600	719.911	-0.26772	0.125111	-2.13986	0.0323661	0.201199
ENSG00000122566	18310.9	-0.267717	0.0991908	-2.69901	0.00695465	0.0897655
ENSG00000132323	215.501	-0.26769	0.168805	-1.58579	0.112787	0.377604
ENSG00000105576	1241.21	-0.267647	0.123989	-2.15864	0.030878	0.196776
ENSG00000118412	487.228	-0.267523	0.125927	-2.12443	0.0336346	0.205647
ENSG00000100151	159.713	-0.26742	0.180977	-1.47764	0.139503	0.422027
ENSG00000004961	306.963	-0.267347	0.174305	-1.53378	0.125083	0.397644
ENSG00000239789	75.8703	-0.267278	0.198574	-1.34599	0.178306	0.474883
ENSG00000198720	234.287	-0.267221	0.156534	-1.70711	0.0878014	0.331344
ENSG00000148337	822.387	-0.267221	0.132384	-2.01853	0.043536	0.231317
ENSG00000136932	41.9299	-0.267214	0.2238	-1.19398	0.232484	0.53981
ENSG00000113282	1284.22	-0.267187	0.116152	-2.30033	0.0214295	0.164356
ENSG00000230733	132.382	-0.267157	0.179954	-1.48459	0.137654	0.419244
ENSG00000124275	433.612	-0.267065	0.152815	-1.74764	0.0805265	0.316428
ENSG00000010803	149.301	-0.266857	0.177865	-1.50034	0.133527	0.412567
ENSG00000108592	1338.18	-0.2668	0.132036	-2.02066	0.0433145	0.230651
ENSG00000137656	418.665	-0.266799	0.140832	-1.89445	0.0581654	0.269601
ENSG00000228766	13.0846	-0.266787	0.225767	-1.18169	0.237328	NA
ENSG00000253953	55.3902	-0.266714	0.210469	-1.26723	0.205072	0.510325
ENSG00000100029	1435.44	-0.26664	0.138762	-1.92156	0.054661	0.261156
ENSG00000117308	165.315	-0.266492	0.163587	-1.62905	0.103303	0.36078
ENSG00000130713	645.316	-0.266461	0.142003	-1.87644	0.0605945	0.273936
ENSG00000156574	39.4108	-0.266453	0.231646	-1.15026	0.250037	0.557744
ENSG00000125445	757.516	-0.266434	0.13331	-1.9986	0.0456518	0.237538
ENSG00000165527	588.107	-0.26637	0.13311	-2.00112	0.0453793	0.236936
ENSG00000099385	86.7524	-0.26624	0.192569	-1.38257	0.166797	0.461759
ENSG00000187607	278.4	-0.266236	0.147765	-1.80176	0.0715835	0.298104
ENSG00000083454	42.3132	-0.266113	0.223688	-1.18966	0.234181	0.541527
ENSG00000172817	4.16593	-0.266043	0.175473	-1.51615	0.129482	NA
ENSG00000121871	93.9397	-0.265988	0.202606	-1.31283	0.18924	0.489913
ENSG00000027697	312.496	-0.265956	0.154634	-1.7199	0.0854499	0.326907
ENSG00000112208	360.467	-0.265894	0.140952	-1.88642	0.0592385	0.270921
ENSG00000153208	83.2479	-0.265889	0.189499	-1.40312	0.160581	0.45323
ENSG00000188352	791.782	-0.265889	0.123412	-2.15448	0.0312029	0.19797
ENSG00000136960	28.9084	-0.265873	0.232475	-1.14366	0.252764	0.560724
ENSG00000161847	415.833	-0.265844	0.168527	-1.57746	0.11469	0.380679
ENSG00000142751	199.424	-0.265554	0.159586	-1.66401	0.0961095	0.348051
ENSG00000160075	1042.64	-0.265336	0.121306	-2.18732	0.028719	0.190289
ENSG00000104299	271.605	-0.265281	0.1528	-1.73614	0.0825396	0.321038
ENSG00000273281	13.5685	-0.265277	0.227585	-1.16562	0.243768	0.551686
ENSG00000129195	1270.8	-0.26494	0.12007	-2.20655	0.0273454	0.184672
ENSG00000160294	1002.98	-0.264932	0.122094	-2.16989	0.0300152	0.193682
ENSG00000196247	351.73	-0.264824	0.137613	-1.92441	0.0543036	0.260687
ENSG00000136448	2081.21	-0.264791	0.105227	-2.51639	0.0118566	0.119756
ENSG00000136715	836.709	-0.264775	0.114711	-2.30819	0.0209885	0.163089
ENSG00000113273	293.124	-0.264736	0.151009	-1.75311	0.0795829	0.315034
ENSG00000157064	291.077	-0.264566	0.139613	-1.895	0.0580926	0.269593
[truncated: 61,678 more rows]

## Sheet: MEL1vMEL2 at 5% O2
Gene ID	Base Mean	Log2(FC)	StdErr	Wald Stats	P value	Padj value
ENSG00000229807	338.492	-4.10611	0.180699	-22.7235	2.62e-114	1.49e-110
ENSG00000083720	196.842	-3.78078	0.177917	-21.2502	3.28e-100	1.4e-96
ENSG00000159228	107.269	-3.04215	0.185306	-16.4169	1.45e-60	2.74e-57
ENSG00000134463	105.271	-2.71952	0.184561	-14.735	3.84e-49	4.36e-46
ENSG00000250616	88.7903	-2.43535	0.185974	-13.0951	3.51e-39	2.85e-36
ENSG00000254184	110.853	-2.2915	0.183138	-12.5124	6.39e-36	4.94e-33
ENSG00000254277	370.67	-2.19841	0.153751	-14.2986	2.23e-46	2.12e-43
ENSG00000165512	77.8374	-2.18198	0.186857	-11.6773	1.67e-31	1.05e-28
ENSG00000173262	130.34	-2.14813	0.182543	-11.7678	5.72e-32	3.74e-29
ENSG00000198046	106.25	-2.0603	0.180245	-11.4305	2.94e-30	1.62e-27
ENSG00000206503	245.547	-2.01306	0.170615	-11.7988	3.96e-32	2.7e-29
ENSG00000223803	253.562	-1.85799	0.157026	-11.8324	2.66e-32	1.88e-29
ENSG00000156253	35.9641	-1.76992	0.182529	-9.69666	3.12e-22	1.47e-19
ENSG00000189221	49.7647	-1.69889	0.186576	-9.10559	8.58e-20	3.25e-17
ENSG00000213058	42.4476	-1.69612	0.185895	-9.12408	7.24e-20	2.8e-17
ENSG00000198105	33.2622	-1.67928	0.181166	-9.26931	1.87e-20	7.78e-18
ENSG00000254339	626.31	-1.64338	0.140945	-11.6597	2.05e-31	1.24e-28
ENSG00000117480	157.028	-1.60728	0.168062	-9.56358	1.14e-21	4.96e-19
ENSG00000213293	46.6166	-1.55689	0.186999	-8.32567	8.39e-17	2.55e-14
ENSG00000132718	134.049	-1.53757	0.174964	-8.78793	1.52e-18	5.08e-16
ENSG00000136383	136.382	-1.5035	0.171857	-8.74858	2.16e-18	7.07e-16
ENSG00000166938	545.996	-1.5015	0.141196	-10.6341	2.07e-26	1.07e-23
ENSG00000196756	300.488	-1.44919	0.157087	-9.22538	2.83e-20	1.15e-17
ENSG00000171291	29.6411	-1.44388	0.179286	-8.05349	8.05e-16	2.36e-13
ENSG00000171954	24.6944	-1.35315	0.173857	-7.78314	7.07e-15	1.94e-12
ENSG00000166770	42.5462	-1.322	0.185689	-7.11943	1.08e-12	2.56e-10
ENSG00000106853	146.833	-1.28114	0.17881	-7.16481	7.79e-13	1.89e-10
ENSG00000111860	171.045	-1.1876	0.164016	-7.24077	4.46e-13	1.12e-10
ENSG00000123240	350.52	-1.16044	0.167145	-6.94272	3.85e-12	8.85e-10
ENSG00000093072	851.843	-1.14139	0.145726	-7.83244	4.78e-15	1.34e-12
ENSG00000169255	40.252	-1.10795	0.184347	-6.01016	1.85e-09	3.15e-07
ENSG00000226102	19.0457	-1.09749	0.165313	-6.63883	3.16e-11	6.9e-09
ENSG00000234449	17.9449	-1.08598	0.163627	-6.63692	3.2e-11	6.9e-09
ENSG00000214553	24.7494	-1.08348	0.174574	-6.20643	5.42e-10	1.01e-07
ENSG00000180155	137.782	-1.04561	0.184041	-5.6814	1.34e-08	2.11e-06
ENSG00000112874	211.664	-1.01229	0.15991	-6.3304	2.45e-10	4.73e-08
ENSG00000188002	28.6903	-1.0095	0.181225	-5.5704	2.54e-08	3.76e-06
ENSG00000121089	192.627	-0.990739	0.16622	-5.9604	2.52e-09	4.2e-07
ENSG00000011638	258.33	-0.980182	0.157652	-6.21739	5.06e-10	9.56e-08
ENSG00000188732	223.058	-0.972312	0.159648	-6.09037	1.13e-09	2e-07
ENSG00000155849	187.633	-0.949712	0.167695	-5.66332	1.48e-08	2.3e-06
ENSG00000225308	19.4002	-0.944275	0.167465	-5.63866	1.71e-08	2.63e-06
ENSG00000198822	61.0217	-0.929489	0.187381	-4.96042	7.03e-07	8.68e-05
ENSG00000078295	847.762	-0.912733	0.143182	-6.37462	1.83e-10	3.59e-08
ENSG00000088882	440.895	-0.903082	0.140149	-6.44371	1.17e-10	2.36e-08
ENSG00000171246	878.464	-0.896523	0.147212	-6.09001	1.13e-09	2e-07
ENSG00000177432	14.1557	-0.87934	0.153532	-5.72739	1.02e-08	1.64e-06
ENSG00000161381	20.5706	-0.867053	0.169483	-5.11587	3.12e-07	4.12e-05
ENSG00000152726	16.08	-0.862419	0.162221	-5.31632	1.06e-07	1.49e-05
ENSG00000103202	1807.53	-0.858592	0.116863	-7.34701	2.03e-13	5.15e-11
ENSG00000204711	85.4302	-0.856019	0.18655	-4.58869	4.46e-06	0.000474287
ENSG00000130303	172.823	-0.849074	0.182273	-4.65825	3.19e-06	0.000343548
ENSG00000230316	71.6001	-0.847814	0.186475	-4.54652	5.45e-06	0.000559227
ENSG00000141934	638.65	-0.847273	0.128328	-6.6024	4.05e-11	8.61e-09
ENSG00000081842	17.3553	-0.839883	0.164393	-5.109	3.24e-07	4.24e-05
ENSG00000147050	1929.32	-0.834991	0.149815	-5.57349	2.5e-08	3.76e-06
ENSG00000224114	169.876	-0.832572	0.163254	-5.09984	3.4e-07	4.42e-05
ENSG00000180938	13.6056	-0.824793	0.152299	-5.41563	6.11e-08	8.66e-06
ENSG00000166816	85.7141	-0.81088	0.187138	-4.33305	1.47e-05	0.00139835
ENSG00000104435	79.3553	-0.809724	0.186941	-4.33143	1.48e-05	0.00140086
ENSG00000113763	117.04	-0.808715	0.176343	-4.58602	4.52e-06	0.000474665
ENSG00000215513	35.2425	-0.787989	0.183844	-4.28618	1.82e-05	0.0016907
ENSG00000228709	114.396	-0.784436	0.177906	-4.40928	1.04e-05	0.00100878
ENSG00000182287	1883.33	-0.78159	0.116934	-6.684	2.33e-11	5.21e-09
ENSG00000175782	103.214	-0.775817	0.182458	-4.25203	2.12e-05	0.00193291
ENSG00000146530	395.108	-0.775303	0.16193	-4.78789	1.69e-06	0.000197848
ENSG00000131203	493.078	-0.765173	0.149545	-5.11667	3.11e-07	4.12e-05
ENSG00000169499	44.9186	-0.749948	0.185889	-4.03438	5.47e-05	0.00450165
ENSG00000179059	1756.69	-0.748749	0.134389	-5.57152	2.53e-08	3.76e-06
ENSG00000146858	12.0112	-0.747196	0.147499	-5.06577	4.07e-07	5.13e-05
ENSG00000249378	12.1291	-0.740592	0.151267	-4.89592	9.78e-07	0.00011896
ENSG00000171533	53.0042	-0.740539	0.187361	-3.95247	7.73e-05	0.00618093
ENSG00000137463	31.0363	-0.736267	0.17647	-4.1722	3.02e-05	0.00267432
ENSG00000100918	210.086	-0.735215	0.161533	-4.55148	5.33e-06	0.000549527
ENSG00000205927	14.2826	-0.731306	0.155112	-4.71469	2.42e-06	0.000270331
ENSG00000134146	228.371	-0.728332	0.162878	-4.47164	7.76e-06	0.00077717
ENSG00000182107	240.833	-0.72132	0.158973	-4.53738	5.7e-06	0.000580524
ENSG00000118257	641.643	-0.716067	0.128866	-5.5567	2.75e-08	4.03e-06
ENSG00000205663	10.8915	-0.712395	0.143123	-4.9775	6.44e-07	8e-05
ENSG00000023608	201.344	-0.710992	0.172119	-4.13082	3.61e-05	0.00310738
ENSG00000163530	63.1549	-0.710819	0.187057	-3.80001	0.000144689	0.0103044
ENSG00000171310	185.461	-0.705548	0.165722	-4.25741	2.07e-05	0.00190276
ENSG00000188897	19.9778	-0.699467	0.171685	-4.07414	4.62e-05	0.00383471
ENSG00000047932	274.907	-0.698171	0.152662	-4.57331	4.8e-06	0.00050132
ENSG00000159374	90.5321	-0.695162	0.185386	-3.7498	0.000176975	0.0119901
ENSG00000227615	1310.56	-0.688008	0.118379	-5.81194	6.18e-09	1e-06
ENSG00000180574	531.915	-0.669412	0.134155	-4.98983	6.04e-07	7.56e-05
ENSG00000120162	530.405	-0.664323	0.137688	-4.82484	1.4e-06	0.000166778
ENSG00000104518	213.466	-0.650668	0.156121	-4.16771	3.08e-05	0.0026969
ENSG00000165588	788.788	-0.639487	0.148524	-4.3056	1.67e-05	0.00156606
ENSG00000164916	124.764	-0.634023	0.185848	-3.41151	0.000646048	0.0360537
ENSG00000146938	1948.12	-0.633263	0.119854	-5.28363	1.27e-07	1.75e-05
ENSG00000225151	16.7722	-0.633211	0.163487	-3.87317	0.000107429	0.00819981
ENSG00000145247	388.122	-0.630831	0.140143	-4.50133	6.75e-06	0.000680127
ENSG00000177932	151.613	-0.630633	0.167737	-3.75965	0.000170154	0.0116313
ENSG00000250420	9.42487	-0.627201	0.13672	-4.58748	4.49e-06	0.000474287
ENSG00000160948	307.763	-0.627127	0.158747	-3.95048	7.8e-05	0.00620338
ENSG00000204959	49.8924	-0.626922	0.187325	-3.34671	0.000817758	0.0433615
ENSG00000226539	15.3495	-0.624058	0.159832	-3.90445	9.44e-05	0.00740767
ENSG00000144451	105.484	-0.616693	0.176111	-3.50174	0.000462237	0.0278997
ENSG00000101417	12.8329	-0.615082	0.147497	-4.17014	3.04e-05	0.00268467
ENSG00000147202	594.23	-0.614704	0.130402	-4.71392	2.43e-06	0.000270331
ENSG00000136052	18.0076	-0.611383	0.169226	-3.61283	0.000302875	0.0194537
ENSG00000205571	22.9626	-0.6069	0.177635	-3.41655	0.000634196	0.0356259
ENSG00000128610	141.254	-0.606481	0.179503	-3.37867	0.000728364	0.0396086
ENSG00000196867	69.6263	-0.60604	0.184276	-3.28877	0.00100627	0.050824
ENSG00000072201	61.0622	-0.604328	0.1866	-3.23862	0.00120109	0.0580791
ENSG00000154864	211.112	-0.601708	0.155883	-3.86	0.000113385	0.00857743
ENSG00000022556	2538.21	-0.60132	0.113209	-5.31157	1.09e-07	1.52e-05
ENSG00000171160	211.934	-0.596863	0.155793	-3.83114	0.000127553	0.00939861
ENSG00000183943	953.752	-0.595749	0.126237	-4.71929	2.37e-06	0.000266772
ENSG00000213967	15.2566	-0.593224	0.157438	-3.76799	0.000164565	0.0113858
ENSG00000206432	69.3104	-0.592937	0.186251	-3.18354	0.00145486	0.0680308
ENSG00000126012	2017.47	-0.588713	0.119843	-4.91238	9e-07	0.000110178
ENSG00000134516	17.5794	-0.583347	0.168333	-3.46543	0.000529375	0.0308579
ENSG00000111981	60.9271	-0.578628	0.187352	-3.08845	0.00201206	0.0894187
ENSG00000123094	473.847	-0.577544	0.136478	-4.23177	2.32e-05	0.00209919
ENSG00000160746	697.935	-0.577349	0.12955	-4.45656	8.33e-06	0.000824192
ENSG00000171724	808.88	-0.5767	0.164493	-3.50592	0.000455024	0.0276606
ENSG00000102710	663.803	-0.567663	0.129284	-4.39081	1.13e-05	0.00109213
ENSG00000228506	29.1826	-0.56727	0.180346	-3.14546	0.00165827	0.0769086
ENSG00000177873	19.2228	-0.567175	0.165061	-3.43616	0.000590015	0.0334755
ENSG00000260834	1273.68	-0.56704	0.156211	-3.62995	0.000283471	0.0182764
ENSG00000161652	10.4154	-0.565828	0.145367	-3.8924	9.93e-05	0.00767927
ENSG00000147872	301.694	-0.564598	0.149921	-3.76598	0.000165894	0.0113858
ENSG00000179698	9.04879	-0.559854	0.138813	-4.03314	5.5e-05	0.00450369
ENSG00000180340	365.49	-0.556276	0.146272	-3.80304	0.000142933	0.0102653
ENSG00000124092	36.7931	-0.553298	0.180145	-3.0714	0.00213059	0.0932852
ENSG00000104497	133.746	-0.550688	0.172518	-3.19206	0.0014126	0.0666033
ENSG00000135248	41.9176	-0.548388	0.186909	-2.93398	0.00334641	0.132772
ENSG00000158220	36.6824	-0.546293	0.185293	-2.94827	0.0031956	0.129198
ENSG00000187994	126.709	-0.54596	0.175315	-3.11416	0.00184469	0.0839533
ENSG00000147246	26.179	-0.545277	0.177014	-3.08042	0.00206709	0.0909146
ENSG00000006625	628.82	-0.544409	0.133111	-4.08988	4.32e-05	0.00363674
ENSG00000158163	59.2029	-0.544389	0.18662	-2.91709	0.00353311	0.138565
ENSG00000104325	153.564	-0.544229	0.166759	-3.26357	0.0011002	0.0544373
ENSG00000198034	13834	-0.54335	0.104726	-5.18829	2.12e-07	2.87e-05
ENSG00000130741	2678.91	-0.542383	0.11426	-4.7469	2.07e-06	0.000239171
ENSG00000164307	203.258	-0.541725	0.161759	-3.34896	0.000811153	0.0431457
ENSG00000183778	476.64	-0.540615	0.166419	-3.24852	0.00116009	0.056741
ENSG00000169249	83.4003	-0.539146	0.181927	-2.96353	0.00304128	0.124437
ENSG00000102886	13.578	-0.536534	0.157852	-3.39896	0.000676425	0.0373813
ENSG00000164111	2261.19	-0.536424	0.111129	-4.82706	1.39e-06	0.000166094
ENSG00000100350	291.701	-0.535935	0.151219	-3.54411	0.000393947	0.0243832
ENSG00000170921	151.545	-0.532378	0.171736	-3.09997	0.00193539	0.0864629
ENSG00000204186	370.87	-0.532093	0.161693	-3.29077	0.000999139	0.0506141
ENSG00000171873	10.3547	-0.531871	0.144692	-3.67589	0.000237019	0.0154571
ENSG00000134285	151.847	-0.526963	0.168851	-3.12088	0.0018031	0.0823511
ENSG00000118960	189.108	-0.525486	0.173562	-3.02765	0.00246463	0.103838
ENSG00000117868	726.239	-0.522223	0.136274	-3.83215	0.000127027	0.00939861
ENSG00000006756	51.7555	-0.520798	0.18733	-2.78012	0.00543394	0.185353
ENSG00000165895	351.902	-0.520674	0.148171	-3.514	0.000441418	0.0270265
ENSG00000198496	28.8021	-0.518192	0.182229	-2.84363	0.00446024	0.160164
ENSG00000110888	407.194	-0.516696	0.165085	-3.12987	0.00174881	0.0807863
ENSG00000181031	26.5957	-0.51643	0.181177	-2.85041	0.00436625	0.158799
ENSG00000149557	485.669	-0.516335	0.1409	-3.66456	0.000247764	0.0160349
ENSG00000165194	23.1013	-0.51507	0.170364	-3.02335	0.00249989	0.104805
ENSG00000077585	85.8724	-0.511833	0.185494	-2.75931	0.00579243	0.193319
ENSG00000196323	1708.03	-0.511737	0.134598	-3.80196	0.000143556	0.0102667
ENSG00000048540	110.636	-0.509962	0.176836	-2.8838	0.00392903	0.148178
ENSG00000233971	14.0055	-0.506136	0.150687	-3.35886	0.000782646	0.0418913
ENSG00000056998	889.098	-0.505913	0.125154	-4.04233	5.29e-05	0.0043728
ENSG00000077157	188.201	-0.505089	0.177263	-2.84938	0.00438049	0.158807
ENSG00000167874	35.5425	-0.504337	0.183015	-2.75572	0.00585633	0.19507
ENSG00000134330	8.92576	-0.501775	0.133147	-3.76858	0.000164179	0.0113858
ENSG00000091947	256.555	-0.497831	0.163066	-3.05293	0.00226616	0.0978993
ENSG00000128274	88.6461	-0.497201	0.183754	-2.7058	0.00681391	0.21719
ENSG00000177034	356.141	-0.49671	0.160755	-3.08987	0.00200246	0.0892246
ENSG00000140181	141.838	-0.495915	0.172605	-2.87313	0.00406432	0.1504
ENSG00000196911	280.3	-0.494799	0.171545	-2.88437	0.00392199	0.148178
ENSG00000204121	21.5905	-0.494008	0.167765	-2.94465	0.00323325	0.129795
ENSG00000106686	17.1573	-0.493264	0.165723	-2.97643	0.00291626	0.120188
ENSG00000078319	75.1567	-0.49248	0.182946	-2.69194	0.00710372	0.222675
ENSG00000130021	338.441	-0.491199	0.148982	-3.29704	0.00097711	0.0496557
ENSG00000168243	789.13	-0.485638	0.143375	-3.38719	0.000706117	0.0386457
ENSG00000247498	10.4191	-0.484068	0.147855	-3.27393	0.00106062	0.0530964
ENSG00000258545	35.2504	-0.48302	0.183911	-2.62637	0.00863007	0.254139
ENSG00000113328	5726.59	-0.48281	0.129117	-3.73933	0.000184511	0.0123644
ENSG00000180730	331.775	-0.482499	0.165708	-2.91174	0.00359426	0.139995
ENSG00000120915	130.739	-0.476413	0.175615	-2.71283	0.00667119	0.213842
ENSG00000124839	720.064	-0.473833	0.136169	-3.47973	0.000501925	0.0297173
ENSG00000176533	107.309	-0.473315	0.17597	-2.68975	0.00715049	0.223729
ENSG00000165983	198.843	-0.47305	0.16114	-2.93564	0.0033286	0.132684
ENSG00000090238	165.209	-0.47172	0.168712	-2.79601	0.00517383	0.178992
ENSG00000189077	178.099	-0.470419	0.165115	-2.84904	0.00438514	0.158807
ENSG00000149679	166.858	-0.469189	0.163317	-2.87288	0.00406753	0.1504
ENSG00000215030	2584.08	-0.468732	0.125389	-3.73821	0.000185333	0.0123708
ENSG00000095932	68.5708	-0.467131	0.187242	-2.4948	0.0126028	0.320482
ENSG00000213930	80.7478	-0.466825	0.184218	-2.53408	0.0112743	0.303134
ENSG00000180488	117.927	-0.466422	0.174796	-2.66838	0.00762174	0.233327
ENSG00000186073	97.5168	-0.466212	0.178691	-2.60904	0.00907972	0.261942
ENSG00000198169	155.341	-0.466205	0.166877	-2.7937	0.00521086	0.179907
ENSG00000163879	139.911	-0.465718	0.168733	-2.76008	0.00577865	0.193238
ENSG00000228716	452.197	-0.465403	0.162025	-2.87242	0.00407347	0.1504
ENSG00000267313	27.132	-0.463622	0.173668	-2.66959	0.00759441	0.233244
ENSG00000146707	31.5988	-0.463536	0.177625	-2.60964	0.00906383	0.261928
ENSG00000170579	200.562	-0.463255	0.169019	-2.74085	0.00612811	0.200976
ENSG00000206532	66.6224	-0.46258	0.13201	-3.50413	0.000458101	0.0277486
ENSG00000231416	171.011	-0.46086	0.173305	-2.65925	0.00783147	0.237611
ENSG00000121680	195.337	-0.46028	0.162829	-2.82677	0.00470205	0.165359
ENSG00000185532	303.183	-0.459316	0.168658	-2.72336	0.00646214	0.209662
ENSG00000141314	134.297	-0.457368	0.180913	-2.52811	0.0114679	0.30444
ENSG00000141295	244.12	-0.456537	0.158041	-2.88872	0.00386818	0.147294
ENSG00000136267	28.3102	-0.455476	0.182547	-2.49511	0.0125917	0.320482
ENSG00000130224	112.827	-0.454995	0.175595	-2.59116	0.0095654	0.273635
ENSG00000111671	77.2737	-0.454796	0.184547	-2.46439	0.0137248	0.336639
ENSG00000203914	36.0946	-0.454332	0.185814	-2.4451	0.0144814	0.349145
ENSG00000177854	45.2123	-0.454159	0.183419	-2.47607	0.0132836	0.332272
ENSG00000183570	70.6232	-0.453926	0.186433	-2.43479	0.0149004	0.356207
ENSG00000111788	66.9881	-0.453396	0.185813	-2.44006	0.0146848	0.352191
ENSG00000163430	6648.71	-0.452097	0.121326	-3.72629	0.000194317	0.0128695
ENSG00000109255	143.966	-0.452081	0.178342	-2.5349	0.0112478	0.302926
ENSG00000179528	7.9369	-0.450902	0.131917	-3.41808	0.00063064	0.0355435
ENSG00000154920	121.136	-0.450236	0.172392	-2.6117	0.0090094	0.261688
ENSG00000111846	1377.13	-0.448658	0.13875	-3.23356	0.00122256	0.0587411
ENSG00000145781	456.046	-0.447937	0.138553	-3.23296	0.00122514	0.0587411
ENSG00000123643	135.469	-0.44773	0.17189	-2.60474	0.00919431	0.264352
ENSG00000271738	74.6824	-0.447538	0.186317	-2.40203	0.0163045	0.373009
ENSG00000102024	2859.61	-0.447118	0.114094	-3.91888	8.9e-05	0.00701035
ENSG00000234335	165.926	-0.445526	0.166852	-2.67019	0.00758075	0.233244
ENSG00000162836	197.43	-0.445362	0.164778	-2.70281	0.00687562	0.21802
ENSG00000158716	98.218	-0.445257	0.179222	-2.48439	0.0129775	0.326761
ENSG00000116675	94.6732	-0.444759	0.178417	-2.49281	0.0126737	0.32101
ENSG00000168476	161.145	-0.443634	0.164656	-2.69431	0.00705346	0.221507
ENSG00000205090	20.5276	-0.443122	0.172689	-2.56601	0.0102875	0.287526
ENSG00000214336	70.8824	-0.441847	0.183877	-2.40295	0.0162633	0.373009
ENSG00000050426	320.198	-0.441583	0.163869	-2.69473	0.00704456	0.221507
ENSG00000087076	71.887	-0.440047	0.18719	-2.3508	0.0187329	0.40742
ENSG00000054219	7.23417	-0.439677	0.127904	-3.43755	0.000587012	0.0334165
ENSG00000189184	680.259	-0.439058	0.153432	-2.86158	0.00421536	0.153969
ENSG00000183067	16.8624	-0.438728	0.166068	-2.64186	0.00824514	0.245351
ENSG00000116106	128.785	-0.438419	0.17545	-2.49882	0.0124606	0.318935
ENSG00000138083	24.5106	-0.432196	0.176645	-2.4467	0.0144172	0.349117
ENSG00000086619	89.0318	-0.432125	0.181525	-2.38052	0.0172881	0.386808
ENSG00000179912	216.324	-0.431638	0.169888	-2.54072	0.0110625	0.301272
ENSG00000242242	12.5151	-0.431603	0.151968	-2.8401	0.00450995	0.16067
ENSG00000177685	92.2263	-0.430218	0.179251	-2.40009	0.0163912	0.374163
ENSG00000133083	760.471	-0.429812	0.127422	-3.37315	0.00074314	0.0400284
ENSG00000224837	305.957	-0.427204	0.146214	-2.92177	0.00348053	0.136818
ENSG00000213025	54.4525	-0.426936	0.187099	-2.28188	0.0224965	0.454765
ENSG00000132470	87.4709	-0.426421	0.186265	-2.28933	0.0220604	0.450216
ENSG00000198300	8.19279	-0.426248	0.128612	-3.31422	0.000919007	0.0474044
ENSG00000132109	131.084	-0.42558	0.170627	-2.49421	0.0126237	0.320482
ENSG00000167996	814.063	-0.424252	0.13912	-3.04953	0.002292	0.0982469
ENSG00000164692	1466.36	-0.424186	0.139826	-3.03367	0.00241602	0.102042
ENSG00000250786	78.388	-0.424046	0.186098	-2.27862	0.0226899	0.457048
ENSG00000079435	50.8354	-0.423711	0.187381	-2.26123	0.0237451	0.471606
ENSG00000196876	234.866	-0.423555	0.161742	-2.61871	0.00882638	0.25681
ENSG00000184005	337.552	-0.420397	0.158183	-2.65767	0.00786839	0.237882
ENSG00000113494	17.8507	-0.419199	0.169378	-2.47493	0.0133262	0.332425
ENSG00000140743	555.871	-0.419057	0.138585	-3.02383	0.00249593	0.104805
ENSG00000011201	1444.06	-0.418687	0.134956	-3.1024	0.0019196	0.0864378
ENSG00000104901	22.4417	-0.41855	0.174158	-2.40328	0.0162489	0.373009
ENSG00000180178	6.10604	-0.418335	0.116697	-3.58481	0.000337327	0.0212654
ENSG00000160352	419.702	-0.417933	0.142275	-2.9375	0.00330868	0.132224
ENSG00000006282	186.634	-0.417427	0.173708	-2.40304	0.0162595	0.373009
ENSG00000158321	1144.76	-0.417254	0.137359	-3.03769	0.00238398	0.10094
ENSG00000066468	1152.77	-0.416564	0.122098	-3.41171	0.000645566	0.0360537
ENSG00000136010	175.747	-0.416533	0.163724	-2.54411	0.0109555	0.29947
ENSG00000235890	31.1545	-0.416496	0.183146	-2.27412	0.022959	0.460728
ENSG00000253706	13.6931	-0.415717	0.156414	-2.6578	0.00786528	0.237882
ENSG00000144749	1584.73	-0.414939	0.121834	-3.40579	0.000659741	0.0366975
ENSG00000140455	146.948	-0.414116	0.166855	-2.4819	0.0130685	0.328307
ENSG00000129194	102.609	-0.413155	0.179973	-2.29565	0.021696	0.446538
ENSG00000265273	28.9895	-0.41108	0.179478	-2.29042	0.0219967	0.450216
ENSG00000136943	840.089	-0.41038	0.122843	-3.3407	0.000835675	0.0439013
ENSG00000251533	9.9478	-0.410048	0.144115	-2.84528	0.00443717	0.160164
ENSG00000147526	147.364	-0.408802	0.169385	-2.41344	0.0158027	0.368968
ENSG00000180336	128.634	-0.408008	0.178714	-2.28302	0.0224294	0.453948
ENSG00000257511	553.2	-0.40786	0.138289	-2.94933	0.00318464	0.129061
ENSG00000196839	268.795	-0.406108	0.166444	-2.43991	0.014691	0.352191
ENSG00000090932	84.5981	-0.405868	0.187379	-2.16603	0.0303092	0.550565
ENSG00000213390	753.928	-0.40541	0.143705	-2.82113	0.00478549	0.167601
ENSG00000248131	159.727	-0.405373	0.169606	-2.39009	0.0168443	0.381965
ENSG00000172572	65.5015	-0.40457	0.185603	-2.17975	0.0292757	0.536386
ENSG00000101850	97.9902	-0.404263	0.178634	-2.26308	0.0236307	0.47043
ENSG00000027075	148.538	-0.403694	0.176377	-2.28882	0.02209	0.450216
ENSG00000214076	48.6009	-0.403683	0.186406	-2.16561	0.0303408	0.550565
ENSG00000205794	12.8838	-0.403033	0.15576	-2.58753	0.00966674	0.275146
ENSG00000111052	171.019	-0.403003	0.171696	-2.34719	0.0189158	0.409357
ENSG00000134248	309.81	-0.402639	0.148071	-2.71923	0.0065434	0.211267
ENSG00000226084	266.446	-0.401566	0.155395	-2.58416	0.00976172	0.276063
ENSG00000255135	119.331	-0.401329	0.178872	-2.24367	0.0248535	0.483343
ENSG00000111602	1611.16	-0.400448	0.121438	-3.29755	0.00097531	0.0496557
ENSG00000006704	396.514	-0.400394	0.145447	-2.75284	0.00590806	0.196026
ENSG00000129103	811.523	-0.40023	0.129688	-3.08611	0.00202796	0.0898905
ENSG00000018869	34.0784	-0.400183	0.185291	-2.15975	0.0307918	0.556378
ENSG00000215256	72.3573	-0.399535	0.185258	-2.15663	0.0310342	0.558386
ENSG00000198839	262.634	-0.398635	0.158111	-2.52123	0.0116944	0.307177
ENSG00000118197	202.389	-0.39845	0.157663	-2.52723	0.0114967	0.30444
ENSG00000107902	305.367	-0.397912	0.157492	-2.52655	0.0115189	0.30444
ENSG00000090339	78.6681	-0.397271	0.185264	-2.14434	0.0320053	0.568053
ENSG00000243566	40.2724	-0.397241	0.186321	-2.13203	0.0330048	0.575588
ENSG00000166796	6.94797	-0.397037	0.122346	-3.24519	0.00117371	0.0570791
ENSG00000183454	46.0922	-0.396819	0.187113	-2.12075	0.033943	0.579152
ENSG00000185437	41.9892	-0.396711	0.187148	-2.11977	0.0340257	0.579152
ENSG00000230658	8.14838	-0.396122	0.133742	-2.96183	0.00305815	0.124827
ENSG00000048545	160.326	-0.395741	0.169332	-2.33707	0.0194354	0.415591
ENSG00000185973	94.6417	-0.395272	0.178664	-2.21238	0.0269407	0.506133
ENSG00000167654	497.994	-0.395082	0.13713	-2.88108	0.00396316	0.148912
ENSG00000260065	33.2789	-0.3947	0.182875	-2.15831	0.0309037	0.556626
ENSG00000219507	237.115	-0.394395	0.154056	-2.56007	0.0104651	0.290107
ENSG00000146250	47.0534	-0.394204	0.187366	-2.10393	0.0353849	0.590477
ENSG00000167513	932.996	-0.393822	0.142443	-2.76477	0.00569628	0.191613
ENSG00000169733	159.53	-0.393692	0.168644	-2.33446	0.0195718	0.417981
ENSG00000136960	32.9032	-0.393668	0.18436	-2.13532	0.0327352	0.574034
ENSG00000170175	156.884	-0.393045	0.165205	-2.37913	0.0173535	0.387122
ENSG00000182195	283.045	-0.393034	0.156783	-2.50687	0.0121804	0.313651
ENSG00000172785	159.171	-0.39288	0.169077	-2.32367	0.0201432	0.426398
ENSG00000186153	70.9641	-0.392783	0.184476	-2.12918	0.0332396	0.57615
ENSG00000165140	29.9442	-0.392728	0.183046	-2.14552	0.0319113	0.566976
ENSG00000135314	13.2028	-0.391646	0.155401	-2.52022	0.011728	0.307585
ENSG00000254535	41.9975	-0.390858	0.187202	-2.08789	0.036808	0.605678
ENSG00000244073	173.423	-0.390789	0.163594	-2.38878	0.0169045	0.382029
ENSG00000168004	96.968	-0.389658	0.186678	-2.08733	0.0368581	0.605678
ENSG00000163286	12.3394	-0.388899	0.153179	-2.53885	0.0111217	0.301839
ENSG00000130222	32.2783	-0.388721	0.179291	-2.1681	0.0301512	0.54888
ENSG00000076716	4168.81	-0.388529	0.113135	-3.4342	0.000594303	0.0336068
ENSG00000254759	46.2204	-0.38826	0.187367	-2.07218	0.0382483	0.615611
ENSG00000159176	13.3977	-0.38765	0.154887	-2.5028	0.0123217	0.31633
ENSG00000186615	56.2208	-0.387413	0.187215	-2.06935	0.0385132	0.618427
ENSG00000183087	324.926	-0.387037	0.160823	-2.4066	0.0161019	0.372379
ENSG00000240225	130.934	-0.386878	0.171576	-2.25485	0.0241426	0.475615
ENSG00000140545	8801.73	-0.386418	0.123478	-3.12944	0.00175137	0.0807863
ENSG00000134686	191.651	-0.386349	0.161393	-2.39384	0.016673	0.378893
ENSG00000179915	219.723	-0.386143	0.167028	-2.31185	0.0207858	0.434727
ENSG00000163219	30.421	-0.38578	0.177756	-2.17028	0.0299858	0.546454
ENSG00000100379	214.375	-0.385468	0.156371	-2.46509	0.0136978	0.336639
ENSG00000255085	5.8194	-0.385149	0.116182	-3.31505	0.000916268	0.0474044
ENSG00000228205	146.16	-0.385101	0.175248	-2.19746	0.0279875	0.520628
ENSG00000160932	751.157	-0.384466	0.147857	-2.60025	0.00931566	0.267389
ENSG00000180592	146.66	-0.384148	0.171246	-2.24326	0.02488	0.483343
ENSG00000158813	191.286	-0.383717	0.161199	-2.3804	0.017294	0.386808
ENSG00000115194	152.445	-0.383331	0.170433	-2.24915	0.0245026	0.481038
ENSG00000161267	105.477	-0.383078	0.179342	-2.13602	0.0326778	0.574034
ENSG00000143627	8.42561	-0.382792	0.138196	-2.76992	0.005607	0.189359
ENSG00000176788	1379.59	-0.382413	0.11988	-3.18996	0.00142292	0.0669045
ENSG00000240682	67.3025	-0.380912	0.185821	-2.04989	0.040375	0.629562
ENSG00000138738	270.771	-0.380296	0.155535	-2.44508	0.0144819	0.349145
ENSG00000241061	597.045	-0.379854	0.131139	-2.89657	0.00377267	0.144954
ENSG00000225470	217.359	-0.378754	0.157566	-2.40379	0.0162263	0.373009
ENSG00000029534	179.693	-0.378299	0.178443	-2.12	0.0340064	0.579152
ENSG00000160961	91.0303	-0.378016	0.183144	-2.06404	0.0390142	0.62178
ENSG00000103152	118.717	-0.377929	0.173421	-2.17926	0.0293127	0.536486
ENSG00000114544	373.539	-0.377792	0.143497	-2.63276	0.00846948	0.251048
ENSG00000160190	193.118	-0.377353	0.162703	-2.31928	0.0203798	0.428252
ENSG00000183172	133.645	-0.377059	0.169816	-2.2204	0.0263918	0.499682
ENSG00000198865	87.4287	-0.377046	0.179851	-2.09643	0.0360438	0.598232
ENSG00000251226	6.47638	-0.37695	0.125204	-3.01068	0.00260661	0.108477
ENSG00000196378	65.4713	-0.376797	0.185243	-2.03407	0.0419448	0.643119
ENSG00000242299	2404.62	-0.376121	0.11408	-3.29698	0.000977302	0.0496557
ENSG00000140464	315.852	-0.376015	0.158298	-2.37535	0.0175321	0.390084
ENSG00000132635	143.054	-0.375071	0.179063	-2.09463	0.0362042	0.599448
ENSG00000135093	93.5736	-0.374776	0.178714	-2.09707	0.0359874	0.598232
ENSG00000187609	48.4363	-0.374691	0.186842	-2.00539	0.0449217	0.666039
ENSG00000044090	480.72	-0.374613	0.176685	-2.12023	0.0339864	0.579152
ENSG00000185838	105.17	-0.374034	0.175806	-2.12754	0.0333755	0.57615
ENSG00000138617	97.5996	-0.373783	0.179231	-2.08548	0.0370254	0.606113
ENSG00000185274	821.621	-0.373361	0.14992	-2.4904	0.0127601	0.322718
ENSG00000146918	1862.8	-0.372309	0.120063	-3.10095	0.00192903	0.0864629
ENSG00000148386	5.47804	-0.371199	0.114359	-3.24592	0.00117071	0.0570791
ENSG00000008311	4022.49	-0.370753	0.134572	-2.75505	0.00586825	0.195085
ENSG00000140577	65.6975	-0.370712	0.185741	-1.99585	0.0459499	0.674235
ENSG00000169764	8794.77	-0.369798	0.115434	-3.20355	0.00135744	0.0643593
ENSG00000043355	2487.64	-0.369366	0.133067	-2.7758	0.00550667	0.187208
ENSG00000171425	509.174	-0.369199	0.15311	-2.41134	0.0158942	0.370089
ENSG00000136247	73.9871	-0.368909	0.110715	-3.33206	0.000862055	0.0450093
ENSG00000133488	22.385	-0.368326	0.176685	-2.08464	0.0371016	0.606113
ENSG00000111670	876.751	-0.367528	0.129235	-2.84387	0.0044569	0.160164
ENSG00000172667	307.159	-0.36683	0.175761	-2.0871	0.0368795	0.605678
ENSG00000126217	188.699	-0.364599	0.163376	-2.23166	0.0256377	0.491418
ENSG00000249790	1974.65	-0.364157	0.136387	-2.67002	0.0075846	0.233244
ENSG00000175161	131.876	-0.363979	0.171074	-2.12761	0.0333693	0.57615
ENSG00000154548	103.259	-0.363554	0.179329	-2.02731	0.0426311	0.646724
ENSG00000164007	195.689	-0.363208	0.171107	-2.1227	0.0337791	0.577843
ENSG00000111058	403.332	-0.362344	0.154588	-2.34394	0.0190811	0.411633
ENSG00000021762	66.0925	-0.36107	0.185085	-1.95084	0.0510764	0.711243
ENSG00000243317	570.184	-0.360873	0.135158	-2.67	0.00758508	0.233244
ENSG00000176912	48.9221	-0.360504	0.186999	-1.92784	0.0538754	0.725486
ENSG00000142794	109.819	-0.359525	0.178857	-2.01013	0.0444176	0.662604
ENSG00000106688	250.282	-0.358767	0.157771	-2.27398	0.0229673	0.460728
ENSG00000230513	7.01048	-0.357528	0.128226	-2.78826	0.00529925	0.182588
ENSG00000169679	2730.22	-0.357239	0.117266	-3.04641	0.00231593	0.0983028
ENSG00000164099	92.8875	-0.357177	0.17951	-1.98974	0.04662	0.680468
ENSG00000070759	134.632	-0.356819	0.169406	-2.10629	0.035179	0.589671
ENSG00000048392	1785.86	-0.356642	0.142139	-2.5091	0.0121038	0.31215
ENSG00000170647	75.0295	-0.356509	0.184679	-1.93043	0.0535539	0.724368
ENSG00000230207	528.342	-0.356106	0.133413	-2.6692	0.00760332	0.233244
ENSG00000177000	168.747	-0.355746	0.165182	-2.15366	0.0312667	0.560964
ENSG00000213153	5.12199	-0.35525	0.109011	-3.25884	0.0011187	0.0548741
ENSG00000242086	42.1779	-0.355227	0.187177	-1.89781	0.0577213	0.739967
ENSG00000165623	46.0121	-0.354143	0.187221	-1.89157	0.0585478	0.744244
ENSG00000137726	201.403	-0.354	0.158417	-2.23461	0.0254428	0.491212
ENSG00000189339	408.774	-0.353966	0.138899	-2.54837	0.0108226	0.297116
ENSG00000197044	21.8991	-0.353916	0.172912	-2.0468	0.0406778	0.631154
ENSG00000169548	5.44212	-0.353851	0.115893	-3.05324	0.00226383	0.0978993
ENSG00000183690	30.1858	-0.352649	0.182899	-1.92811	0.053841	0.725486
ENSG00000135929	63.3492	-0.352484	0.18658	-1.88918	0.0588677	0.746081
ENSG00000161513	345.137	-0.35233	0.173569	-2.02991	0.0423652	0.644413
ENSG00000083845	7349.39	-0.352266	0.105942	-3.32508	0.000883929	0.0460103
ENSG00000140043	89.5153	-0.352005	0.184976	-1.90297	0.0570445	0.736129
ENSG00000018610	170.508	-0.351832	0.166677	-2.11086	0.0347842	0.5862
ENSG00000246089	80.4252	-0.351337	0.182166	-1.92866	0.053773	0.725486
ENSG00000137413	336.652	-0.351258	0.14707	-2.38837	0.0169232	0.382029
ENSG00000172922	137.393	-0.350004	0.171963	-2.03534	0.0418167	0.642609
ENSG00000165495	34.1209	-0.349806	0.185563	-1.8851	0.0594157	0.749122
ENSG00000103226	88.8838	-0.349762	0.179947	-1.94369	0.0519324	0.714672
ENSG00000055118	108.672	-0.349519	0.184242	-1.89706	0.0578201	0.739967
ENSG00000144331	25.2378	-0.34915	0.179564	-1.94443	0.0518432	0.714513
ENSG00000197852	214.873	-0.349006	0.159355	-2.19011	0.0285161	0.526346
ENSG00000132535	393.779	-0.348774	0.156834	-2.22383	0.0261596	0.498056
ENSG00000037757	38.1279	-0.348571	0.186272	-1.8713	0.0613037	0.762199
ENSG00000106049	547.455	-0.348215	0.141166	-2.4667	0.0136365	0.336029
ENSG00000177096	11.9936	-0.347367	0.154794	-2.24406	0.0248283	0.483343
ENSG00000056487	233.283	-0.346956	0.163747	-2.11886	0.0341025	0.579879
ENSG00000133627	317.761	-0.346859	0.147403	-2.35314	0.0186158	0.406751
ENSG00000116991	203.289	-0.346114	0.168394	-2.05538	0.039842	0.626395
ENSG00000144134	30.0502	-0.34605	0.18308	-1.89015	0.0587377	0.745544
ENSG00000126091	88.8713	-0.345875	0.182308	-1.8972	0.0578012	0.739967
ENSG00000142733	100.262	-0.345573	0.178522	-1.93574	0.0528994	0.722136
ENSG00000258289	112.613	-0.345344	0.180767	-1.91044	0.0560766	0.733364
ENSG00000172554	51.3616	-0.344312	0.187335	-1.83795	0.0660694	0.786411
ENSG00000140526	578.193	-0.342989	0.145628	-2.35523	0.0185111	0.406027
ENSG00000166402	562.74	-0.342579	0.131356	-2.60801	0.00910695	0.262283
ENSG00000163931	12671.2	-0.342122	0.115423	-2.96408	0.0030359	0.124437
ENSG00000160191	390.753	-0.342027	0.140583	-2.43292	0.0149777	0.357051
ENSG00000165868	44.2134	-0.341925	0.185962	-1.83868	0.0659615	0.786411
ENSG00000062282	34.1357	-0.341846	0.180917	-1.88952	0.0588218	0.746055
ENSG00000145687	252.917	-0.341501	0.153956	-2.21818	0.0265428	0.500871
ENSG00000100271	91.905	-0.34148	0.18134	-1.8831	0.0596871	0.751853
ENSG00000103260	67.317	-0.341298	0.18501	-1.84475	0.0650737	0.78277
ENSG00000184898	39.1026	-0.340862	0.186838	-1.82438	0.0680952	0.801628
ENSG00000106069	24.8243	-0.340696	0.179993	-1.89282	0.0583813	0.743785
ENSG00000267100	216.571	-0.340233	0.156195	-2.17826	0.0293867	0.537203
ENSG00000129534	800.286	-0.340007	0.140249	-2.42431	0.0153376	0.363581
ENSG00000064763	347.57	-0.339745	0.145766	-2.33075	0.0197665	0.420678
ENSG00000136770	192.38	-0.339564	0.161753	-2.09928	0.0357921	0.596103
ENSG00000135097	415.45	-0.339372	0.147401	-2.30238	0.021314	0.440809
ENSG00000182667	231.611	-0.338757	0.154389	-2.19419	0.0282221	0.522707
ENSG00000162039	49.5174	-0.338753	0.176305	-1.92141	0.0546804	0.731119
ENSG00000030419	55.8697	-0.338722	0.187167	-1.80973	0.0703376	0.815053
ENSG00000099994	44.2086	-0.338561	0.186593	-1.81443	0.0696108	0.810566
ENSG00000254602	26.3836	-0.338005	0.180143	-1.87632	0.0606113	0.756353
ENSG00000223891	87.9214	-0.337835	0.181369	-1.8627	0.0625051	0.767604
ENSG00000169895	553.576	-0.337484	0.134228	-2.51427	0.011928	0.310034
ENSG00000159208	113.641	-0.337079	0.1739	-1.93835	0.052581	0.719439
ENSG00000167535	149.63	-0.336923	0.16992	-1.98284	0.0473855	0.68584
ENSG00000198792	627.155	-0.336528	0.13301	-2.53009	0.0114035	0.304012
ENSG00000236255	20.9608	-0.336317	0.174451	-1.92786	0.053873	0.725486
ENSG00000088543	118.803	-0.336218	0.180256	-1.86522	0.0621502	0.766382
ENSG00000053254	1922.56	-0.336174	0.123652	-2.71872	0.0065536	0.211267
ENSG00000021355	218.229	-0.335976	0.166064	-2.02317	0.0430558	0.650347
ENSG00000269118	5.14734	-0.335598	0.110058	-3.04928	0.0022939	0.0982469
ENSG00000008130	542.741	-0.335306	0.137057	-2.44648	0.0144259	0.349117
ENSG00000144182	56.8746	-0.334933	0.187381	-1.78745	0.0738653	0.830411
ENSG00000051382	691.975	-0.334356	0.13932	-2.39991	0.0163989	0.374163
ENSG00000215440	50.1594	-0.334275	0.187341	-1.78431	0.0743731	0.830411
ENSG00000121653	354.91	-0.333733	0.144912	-2.30301	0.0212782	0.440809
ENSG00000142102	345.696	-0.333665	0.161489	-2.06617	0.038812	0.62092
ENSG00000007384	167.941	-0.332881	0.17351	-1.91851	0.0550462	0.733016
ENSG00000182979	1373.3	-0.332714	0.14162	-2.34934	0.0188067	0.407783
ENSG00000179294	51.2656	-0.332429	0.187346	-1.77441	0.0759947	0.834422
ENSG00000150627	50.7349	-0.332257	0.187373	-1.77324	0.0761887	0.834496
ENSG00000152520	435.928	-0.332223	0.15071	-2.20439	0.027497	0.514315
ENSG00000162616	158.546	-0.331824	0.168283	-1.97182	0.0486303	0.694866
ENSG00000078596	181.935	-0.331469	0.162898	-2.03482	0.0418691	0.642609
ENSG00000054148	456.241	-0.331109	0.135548	-2.44274	0.0145761	0.35092
ENSG00000111644	7.79934	-0.330929	0.13004	-2.54482	0.0109334	0.29947
ENSG00000129991	121.264	-0.330852	0.177889	-1.85988	0.0629032	0.770824
ENSG00000128594	134.815	-0.33054	0.178397	-1.85284	0.0639056	0.779482
ENSG00000185052	73.1655	-0.330423	0.184405	-1.79183	0.0731598	0.826325
ENSG00000185834	438.494	-0.330002	0.139675	-2.36264	0.0181453	0.400066
ENSG00000139625	139.64	-0.329744	0.16836	-1.95856	0.050164	0.702562
ENSG00000105048	705.829	-0.329476	0.136195	-2.41915	0.0155567	0.365229
ENSG00000151240	214.059	-0.329374	0.165494	-1.99025	0.0465631	0.680468
ENSG00000117114	1991.61	-0.329294	0.114374	-2.87911	0.00398803	0.149516
ENSG00000176531	41.6252	-0.329282	0.185557	-1.77456	0.0759698	0.834422
ENSG00000153157	28.6986	-0.328891	0.182907	-1.79813	0.0721562	0.821934
ENSG00000261780	42.8407	-0.328068	0.187029	-1.7541	0.0794127	0.845471
ENSG00000112562	102.152	-0.327792	0.176798	-1.85405	0.0637325	0.778541
ENSG00000104983	82.2718	-0.327629	0.184697	-1.77387	0.0760839	0.834422
ENSG00000148175	360.185	-0.327445	0.145894	-2.2444	0.0248065	0.483343
ENSG00000241644	16.9886	-0.326946	0.163744	-1.99669	0.0458588	0.674061
ENSG00000178467	140.235	-0.326846	0.169929	-1.92343	0.0544267	0.729446
ENSG00000105538	71.2171	-0.326552	0.185753	-1.75799	0.0787493	0.843955
ENSG00000250510	41.5822	-0.32632	0.186581	-1.74894	0.0803011	0.845514
ENSG00000123453	163.826	-0.325722	0.17026	-1.91308	0.0557373	0.733116
ENSG00000158769	1903.3	-0.32552	0.127638	-2.55033	0.010762	0.296409
ENSG00000164253	539.921	-0.325339	0.13978	-2.32751	0.019938	0.423675
ENSG00000111266	1166.18	-0.325136	0.127408	-2.55193	0.0107128	0.29553
ENSG00000100196	99.1615	-0.324979	0.181855	-1.78702	0.0739342	0.830411
ENSG00000158427	58.855	-0.32423	0.186222	-1.74109	0.0816671	0.852272
ENSG00000120896	503.984	-0.324186	0.168477	-1.92422	0.0543275	0.728914
ENSG00000135480	86.0409	-0.323766	0.18121	-1.78669	0.0739872	0.830411
ENSG00000148908	80.1519	-0.323715	0.186051	-1.73992	0.0818722	0.852421
ENSG00000147255	416.642	-0.32328	0.137772	-2.34648	0.0189515	0.409357
ENSG00000198477	135.883	-0.323129	0.169041	-1.91154	0.0559351	0.733116
ENSG00000178425	847.433	-0.323071	0.128664	-2.51096	0.0120405	0.31146
ENSG00000225484	54.6763	-0.322851	0.186981	-1.72665	0.0842297	0.861485
ENSG00000066382	24.6575	-0.32275	0.177178	-1.82162	0.0685131	0.803276
ENSG00000153046	1340.06	-0.322614	0.120355	-2.68051	0.00735095	0.229159
ENSG00000126787	2101.52	-0.322393	0.116514	-2.76698	0.00565784	0.190697
ENSG00000197497	33.0836	-0.322392	0.184267	-1.74959	0.0801891	0.845514
ENSG00000225138	17.9284	-0.321708	0.169174	-1.90165	0.0572174	0.737313
ENSG00000189143	433.856	-0.32152	0.167666	-1.91762	0.0551596	0.733016
ENSG00000138028	37.6456	-0.321515	0.18453	-1.74235	0.0814478	0.851378
ENSG00000214748	25.2292	-0.320789	0.176945	-1.81294	0.0698418	0.811452
ENSG00000169914	207.937	-0.320479	0.159516	-2.00908	0.0445291	0.663106
ENSG00000164978	170.849	-0.320167	0.164167	-1.95025	0.0511463	0.711243
ENSG00000151651	25.7393	-0.320121	0.17611	-1.81773	0.0691057	0.806201
ENSG00000115339	235.901	-0.320117	0.170017	-1.88285	0.0597206	0.751853
ENSG00000164171	138.515	-0.319935	0.178279	-1.79457	0.0727217	0.824098
ENSG00000167543	139.339	-0.31987	0.175746	-1.82007	0.0687481	0.803276
ENSG00000166750	121.631	-0.319576	0.176197	-1.81375	0.0697166	0.810566
ENSG00000232888	385.33	-0.319101	0.144819	-2.20344	0.0275639	0.514436
ENSG00000171823	42.746	-0.318833	0.187076	-1.70429	0.0883264	0.878156
ENSG00000175730	49.9351	-0.317927	0.18731	-1.69733	0.0896346	0.880983
ENSG00000219665	148.227	-0.317885	0.16981	-1.87201	0.0612056	0.761536
ENSG00000138175	416.084	-0.31765	0.145853	-2.17788	0.029415	0.537203
ENSG00000116299	21.8877	-0.317473	0.172845	-1.83674	0.0662478	0.787983
ENSG00000105516	60.7645	-0.316981	0.187307	-1.69231	0.0905874	0.884257
ENSG00000184117	3189.37	-0.316968	0.124932	-2.53712	0.0111768	0.301969
ENSG00000162999	38.2007	-0.316912	0.184512	-1.71757	0.0858749	0.866436
ENSG00000025039	214.064	-0.316786	0.160142	-1.97816	0.0479107	0.689922
ENSG00000040933	638.577	-0.316047	0.131551	-2.40247	0.0162847	0.373009
ENSG00000148600	143.633	-0.315913	0.176193	-1.79299	0.0729745	0.826325
ENSG00000258667	14.4911	-0.315642	0.13312	-2.37111	0.0177346	0.393048
ENSG00000135541	161.654	-0.315606	0.164469	-1.91894	0.054992	0.732983
ENSG00000050438	156.029	-0.315471	0.170496	-1.85031	0.0642684	0.780121
ENSG00000169251	770.133	-0.315338	0.130588	-2.41477	0.0157453	0.368133
ENSG00000214530	114.05	-0.315213	0.18004	-1.75079	0.079982	0.845514
ENSG00000131037	127.646	-0.314932	0.174397	-1.80583	0.0709446	0.816806
ENSG00000105321	220.338	-0.314807	0.161621	-1.9478	0.0514384	0.713091
ENSG00000177600	5438.22	-0.314605	0.116405	-2.70268	0.00687837	0.21802
ENSG00000133985	792.123	-0.314589	0.127655	-2.46436	0.0137258	0.336639
ENSG00000107554	688.418	-0.314135	0.141885	-2.21401	0.0268283	0.504579
ENSG00000196605	45.0491	-0.314093	0.187379	-1.67625	0.0936898	0.891916
ENSG00000196353	21.4733	-0.313309	0.175122	-1.78909	0.0736008	0.829093
ENSG00000124762	272.681	-0.313096	0.175822	-1.78076	0.074952	0.831309
ENSG00000226210	85.8902	-0.3129	0.180972	-1.72899	0.0838102	0.860698
ENSG00000158158	271.89	-0.312558	0.153274	-2.03921	0.0414292	0.638221
ENSG00000133315	136.882	-0.312525	0.185879	-1.68134	0.0926966	0.890841
ENSG00000149926	257.002	-0.312407	0.176277	-1.77225	0.0763539	0.835231
ENSG00000177042	79.697	-0.312329	0.182136	-1.71481	0.08638	0.868956
ENSG00000105289	160.213	-0.31225	0.176312	-1.77101	0.0765585	0.836311
ENSG00000169862	144.403	-0.311675	0.17127	-1.81979	0.0687907	0.803276
ENSG00000168490	125.49	-0.311635	0.174334	-1.78758	0.0738444	0.830411
ENSG00000186603	130.155	-0.311472	0.177799	-1.75182	0.079804	0.845471
ENSG00000164296	31.1283	-0.311004	0.184474	-1.6859	0.0918152	0.889943
ENSG00000236552	3454.67	-0.311002	0.112049	-2.77558	0.00551033	0.187208
ENSG00000133111	99.5704	-0.31098	0.178929	-1.73801	0.0822088	0.853737
ENSG00000149273	15540.5	-0.310593	0.105412	-2.94647	0.00321421	0.12957
ENSG00000125746	211.388	-0.310421	0.179076	-1.73345	0.0830152	0.855962
ENSG00000229994	219.015	-0.310098	0.158349	-1.95833	0.0501918	0.702562
ENSG00000171443	22.8513	-0.309908	0.176713	-1.75374	0.0794752	0.845471
ENSG00000147257	1813.54	-0.309654	0.114436	-2.70593	0.00681137	0.21719
ENSG00000235552	986.349	-0.309576	0.125102	-2.47458	0.0133392	0.332425
ENSG00000176225	418.332	-0.309562	0.150836	-2.05231	0.0401393	0.628875
ENSG00000269994	83.8309	-0.309525	0.182373	-1.69721	0.0896564	0.880983
ENSG00000105122	9.03306	-0.309452	0.130338	-2.37422	0.0175861	0.390774
ENSG00000183379	147.814	-0.309361	0.180022	-1.71846	0.0857129	0.866249
ENSG00000231205	108.558	-0.309163	0.175613	-1.76047	0.0783274	0.842676
ENSG00000128294	478.923	-0.308724	0.133919	-2.30529	0.0211501	0.440631
ENSG00000198964	209.039	-0.308628	0.157088	-1.96468	0.0494508	0.699089
ENSG00000068903	99.2497	-0.308595	0.178129	-1.73242	0.0831981	0.856693
ENSG00000204334	21.7598	-0.308255	0.175651	-1.75493	0.0792719	0.845471
ENSG00000087253	44.0272	-0.308038	0.187001	-1.64725	0.0995061	0.912789
ENSG00000113272	145.348	-0.308021	0.168662	-1.82626	0.0678104	0.800381
ENSG00000172986	41.9687	-0.307841	0.186915	-1.64696	0.0995656	0.912789
ENSG00000197958	6449.8	-0.307789	0.110502	-2.78537	0.00534661	0.183108
ENSG00000135365	470.217	-0.307736	0.155447	-1.97969	0.0477387	0.688138
ENSG00000108830	896.015	-0.307503	0.127878	-2.40465	0.0161877	0.373009
ENSG00000106460	766.583	-0.307045	0.149825	-2.04936	0.0404272	0.629562
ENSG00000100027	126.573	-0.306916	0.182626	-1.68058	0.0928453	0.890841
ENSG00000180672	23.184	-0.306454	0.174342	-1.75778	0.0787849	0.843955
ENSG00000256612	6.94427	-0.306008	0.129472	-2.36351	0.0181026	0.399641
ENSG00000129990	11.4736	-0.305953	0.151825	-2.01518	0.0438863	0.657733
ENSG00000006453	379.495	-0.305627	0.145961	-2.0939	0.0362689	0.599935
ENSG00000132879	164.368	-0.305237	0.163481	-1.86711	0.0618859	0.764852
ENSG00000234145	174.383	-0.30505	0.163426	-1.86659	0.0619585	0.764852
ENSG00000198346	332.503	-0.305043	0.144737	-2.10756	0.035069	0.589249
ENSG00000105278	132.137	-0.304844	0.179852	-1.69498	0.0900801	0.881877
ENSG00000101017	98.0053	-0.304723	0.179422	-1.69837	0.0894389	0.880983
ENSG00000218739	465.463	-0.304578	0.143124	-2.12806	0.0333318	0.57615
ENSG00000258072	16.8849	-0.304042	0.164631	-1.84681	0.064775	0.781583
ENSG00000054282	73.9581	-0.303987	0.184115	-1.65107	0.0987243	0.910472
ENSG00000104883	28.4169	-0.303738	0.178599	-1.70067	0.0890052	0.880277
ENSG00000176857	19.3093	-0.303655	0.17318	-1.75341	0.0795312	0.845471
ENSG00000104375	202.017	-0.30301	0.162639	-1.86308	0.0624505	0.767487
ENSG00000248593	27.7395	-0.30285	0.181123	-1.67207	0.0945104	0.894198
ENSG00000105373	2115.57	-0.3026	0.130248	-2.32325	0.0201655	0.426398
ENSG00000229638	2498.13	-0.302321	0.117254	-2.57836	0.00992719	0.27929
ENSG00000135378	28.7638	-0.301722	0.182248	-1.65555	0.0978121	0.907377
ENSG00000147604	796.394	-0.301684	0.124866	-2.41607	0.015689	0.367322
ENSG00000136895	43.6838	-0.301263	0.187205	-1.60927	0.107558	0.930206
ENSG00000220008	9.68036	-0.301252	0.135623	-2.22125	0.0263342	0.499682
ENSG00000171757	5.83741	-0.300736	0.118431	-2.53935	0.0111059	0.301839
ENSG00000151131	185.505	-0.300462	0.163213	-1.84092	0.065634	0.786411
ENSG00000109762	227.663	-0.300426	0.158544	-1.89491	0.0581047	0.742457
ENSG00000004777	217.586	-0.300387	0.169874	-1.76829	0.077012	0.836767
ENSG00000163995	21.0802	-0.300044	0.175977	-1.70501	0.0881918	0.877844
ENSG00000163449	46.4057	-0.299808	0.186953	-1.60365	0.108791	0.934387
ENSG00000099282	135.386	-0.29911	0.171036	-1.74881	0.0803241	0.845514
ENSG00000231789	70.4273	-0.29906	0.184985	-1.61667	0.105949	0.925787
ENSG00000090013	177.085	-0.298645	0.166964	-1.78868	0.0736656	0.829274
ENSG00000181524	332.462	-0.298398	0.14648	-2.03712	0.0416382	0.640799
ENSG00000161888	280.97	-0.29816	0.148674	-2.00546	0.0449138	0.666039
ENSG00000101546	154.557	-0.298034	0.173647	-1.71632	0.0861027	0.86761
ENSG00000243943	382.94	-0.298028	0.139538	-2.13581	0.0326945	0.574034
ENSG00000170734	79.2129	-0.297758	0.183704	-1.62085	0.105049	0.923759
ENSG00000145103	25.4885	-0.297747	0.173332	-1.71778	0.0858366	0.866436
ENSG00000243811	82.8711	-0.29773	0.183319	-1.62411	0.104353	0.923759
ENSG00000187239	492.911	-0.297673	0.135798	-2.19203	0.0283775	0.524445
ENSG00000131459	1938.35	-0.297664	0.115191	-2.58408	0.00976383	0.276063
ENSG00000144893	196.471	-0.297643	0.174154	-1.70908	0.0874357	0.874117
ENSG00000187008	8.73921	-0.297534	0.140094	-2.12382	0.0336852	0.577843
ENSG00000116667	612.496	-0.297489	0.142714	-2.08451	0.0371138	0.606113
ENSG00000178585	417.06	-0.297455	0.139557	-2.13143	0.033054	0.575857
ENSG00000065923	169.526	-0.297435	0.175083	-1.69883	0.0893522	0.880983
ENSG00000046647	142.669	-0.297293	0.167744	-1.7723	0.0763443	0.835231
ENSG00000115183	138.46	-0.296921	0.16892	-1.75776	0.0787876	0.843955
ENSG00000095596	396.552	-0.296858	0.169307	-1.75337	0.0795389	0.845471
ENSG00000228624	471.482	-0.296669	0.14942	-1.98547	0.0470917	0.683334
ENSG00000266709	68.0163	-0.296566	0.185289	-1.60056	0.109475	0.936447
ENSG00000100982	476.764	-0.296543	0.167881	-1.76639	0.0773311	0.838378
ENSG00000183011	122.298	-0.296357	0.173247	-1.7106	0.087155	0.873939
ENSG00000167861	142.617	-0.29619	0.180157	-1.64406	0.100163	0.913173
ENSG00000152061	1159.77	-0.296161	0.120003	-2.46794	0.0135893	0.336029
ENSG00000056661	507.157	-0.29612	0.137195	-2.15839	0.0308975	0.556626
ENSG00000214541	327.978	-0.295798	0.154665	-1.91251	0.0558105	0.733116
ENSG00000007047	534.247	-0.295734	0.155267	-1.90468	0.0568215	0.736129
ENSG00000129596	224.917	-0.295658	0.160861	-1.83797	0.0660668	0.786411
ENSG00000189067	1216.3	-0.295291	0.131397	-2.24732	0.0246196	0.482469
ENSG00000224546	248.017	-0.295153	0.160509	-1.83886	0.0659356	0.786411
ENSG00000243199	726.883	-0.295048	0.128888	-2.28919	0.0220685	0.450216
ENSG00000051523	524.943	-0.295044	0.142806	-2.06604	0.0388247	0.62092
ENSG00000228502	92.0038	-0.295039	0.186002	-1.58621	0.112691	0.943029
ENSG00000073605	59.966	-0.294302	0.187365	-1.57074	0.116242	0.947038
ENSG00000133812	799.12	-0.294089	0.132672	-2.21666	0.0266465	0.502271
ENSG00000172456	93.2525	-0.293886	0.183794	-1.59899	0.109822	0.93677
ENSG00000160014	3402.01	-0.29357	0.110672	-2.65263	0.00798678	0.239758
ENSG00000182175	470.287	-0.293485	0.147021	-1.99621	0.0459108	0.674235
ENSG00000138801	1441.58	-0.293401	0.12186	-2.40768	0.0160543	0.372289
ENSG00000141013	42.2824	-0.293196	0.187095	-1.5671	0.117092	0.94928
ENSG00000081803	211.827	-0.293096	0.166424	-1.76114	0.0782148	0.842528
ENSG00000196189	134.705	-0.292919	0.174964	-1.67416	0.0940991	0.891916
ENSG00000111961	383.93	-0.292884	0.147822	-1.98134	0.0475533	0.687684
ENSG00000103316	128.677	-0.29275	0.175808	-1.66516	0.0958802	0.898666
ENSG00000197696	73.6735	-0.292589	0.183718	-1.5926	0.111249	0.940142
ENSG00000165905	1311.55	-0.292463	0.120669	-2.42368	0.0153641	0.363581
ENSG00000178235	27.225	-0.292349	0.180803	-1.61695	0.10589	0.925787
ENSG00000111912	123.278	-0.292227	0.171614	-1.70281	0.0886028	0.879876
ENSG00000225663	109.04	-0.291925	0.177419	-1.6454	0.0998884	0.913173
ENSG00000171680	206.103	-0.291862	0.16708	-1.74684	0.0806651	0.847008
ENSG00000170846	171.046	-0.291789	0.163498	-1.78467	0.074315	0.830411
ENSG00000262246	58.6181	-0.291774	0.186574	-1.56385	0.117853	0.94928
ENSG00000135638	38.122	-0.291667	0.183842	-1.58651	0.112624	0.942928
ENSG00000139832	211.122	-0.291557	0.164263	-1.77494	0.0759075	0.834422
ENSG00000196693	201.651	-0.291498	0.157978	-1.84518	0.0650115	0.78277
ENSG00000117069	64.0303	-0.291415	0.185231	-1.57325	0.115661	0.945722
ENSG00000108984	381.117	-0.290922	0.148469	-1.95947	0.0500574	0.701835
ENSG00000121297	78.0595	-0.290797	0.184986	-1.572	0.115952	0.945722
ENSG00000114416	3694.57	-0.290367	0.119847	-2.42281	0.0154011	0.363581
ENSG00000105325	273.491	-0.290338	0.159403	-1.82141	0.0685445	0.803276
ENSG00000164187	128.558	-0.290338	0.174176	-1.66692	0.0955308	0.897527
ENSG00000225093	180.452	-0.290248	0.166595	-1.74224	0.0814672	0.851378
ENSG00000115459	60.081	-0.2898	0.185886	-1.55902	0.118991	0.950019
ENSG00000168748	29.1576	-0.289662	0.180392	-1.60573	0.108332	0.932688
ENSG00000151468	23.994	-0.289449	0.176439	-1.64051	0.100899	0.9138
ENSG00000152527	76.6724	-0.289261	0.18491	-1.56433	0.11774	0.94928
ENSG00000233098	201.823	-0.289224	0.158872	-1.82049	0.0686851	0.803276
ENSG00000102781	208.141	-0.289133	0.156517	-1.84729	0.0647049	0.781583
ENSG00000106948	438.184	-0.289118	0.136599	-2.11654	0.0342989	0.581475
ENSG00000197705	30.0354	-0.288671	0.182361	-1.58296	0.113429	0.945722
ENSG00000234608	126.929	-0.288457	0.171272	-1.6842	0.0921424	0.8901
ENSG00000105205	4.25551	-0.288312	0.103473	-2.78636	0.0053303	0.182918
ENSG00000242071	2971.12	-0.288279	0.119512	-2.41214	0.0158592	0.36978
ENSG00000173041	4.07666	-0.28821	0.0996322	-2.89274	0.00381894	0.145745
ENSG00000226564	20.2032	-0.288104	0.174593	-1.65014	0.0989137	0.910472
ENSG00000180329	275.876	-0.287936	0.151444	-1.90127	0.0572662	0.737313
ENSG00000169239	62.5791	-0.287923	0.18722	-1.53789	0.124075	0.963453
ENSG00000251333	133.078	-0.287675	0.171042	-1.6819	0.0925891	0.890841
ENSG00000205133	148.495	-0.287398	0.176043	-1.63255	0.102564	0.919298
ENSG00000101160	283.912	-0.287279	0.147831	-1.94329	0.0519807	0.714672
ENSG00000155957	15.3958	-0.287129	0.162525	-1.76668	0.0772823	0.838378
ENSG00000167632	180.888	-0.286901	0.163732	-1.75226	0.07973	0.845471
ENSG00000230623	198.304	-0.286893	0.159384	-1.80001	0.0718584	0.820874
ENSG00000128617	19.8897	-0.286586	0.167217	-1.71385	0.0865556	0.870209
ENSG00000111653	151.568	-0.286538	0.17063	-1.6793	0.0930945	0.890841
ENSG00000156103	488.02	-0.286432	0.149601	-1.91464	0.0555385	0.733116
ENSG00000159307	75.1556	-0.286233	0.18412	-1.5546	0.120041	0.952772
ENSG00000234745	77.5193	-0.285732	0.18562	-1.53934	0.123722	0.963411
ENSG00000125968	242.358	-0.285647	0.176455	-1.61881	0.105487	0.924088
ENSG00000182670	534.767	-0.285554	0.162668	-1.75544	0.0791844	0.845471
ENSG00000130270	98.602	-0.285355	0.186931	-1.52652	0.12688	0.973734
ENSG00000153832	73.7914	-0.28516	0.184889	-1.54233	0.122993	0.962016
ENSG00000197712	140.488	-0.284976	0.182575	-1.56087	0.118554	0.949607
ENSG00000092330	294.342	-0.284602	0.151401	-1.87979	0.0601367	0.754857
ENSG00000132563	427.012	-0.284557	0.145896	-1.95041	0.0511275	0.711243
ENSG00000125967	97.0609	-0.284543	0.178061	-1.59801	0.110041	0.93677
ENSG00000138356	202.252	-0.284502	0.165378	-1.72031	0.0853765	0.866027
ENSG00000167658	43027.1	-0.284421	0.129316	-2.19943	0.0278474	0.5186
ENSG00000220848	30.999	-0.28435	0.1845	-1.5412	0.123269	0.962016
ENSG00000142541	12674.9	-0.28432	0.112336	-2.53098	0.0113744	0.304012
ENSG00000071889	160.111	-0.284125	0.164894	-1.72307	0.0848752	0.862999
ENSG00000021300	137.457	-0.284059	0.171402	-1.65726	0.0974662	0.905552
ENSG00000013288	74.4331	-0.283847	0.18393	-1.54323	0.122774	0.962016
ENSG00000204007	4.26696	-0.283673	0.103084	-2.75186	0.00592573	0.196229
ENSG00000230291	50.3434	-0.283586	0.187274	-1.51429	0.129953	0.978299
ENSG00000140995	491.08	-0.283465	0.13901	-2.03917	0.0414332	0.638221
ENSG00000262519	44.6949	-0.283455	0.187351	-1.51296	0.13029	0.978943
ENSG00000140905	19.6677	-0.283455	0.171853	-1.6494	0.0990655	0.910472
ENSG00000137166	182.287	-0.283277	0.163915	-1.7282	0.0839524	0.860816
ENSG00000172247	13.972	-0.283055	0.158003	-1.79145	0.0732209	0.826325
ENSG00000109065	308.003	-0.282697	0.15359	-1.84059	0.0656813	0.786411
ENSG00000105193	7381.16	-0.282459	0.106853	-2.64345	0.00820668	0.244634
ENSG00000196263	5.81325	-0.282076	0.12021	-2.34652	0.0189497	0.409357
ENSG00000152932	194.841	-0.281983	0.163216	-1.72766	0.0840491	0.861006
ENSG00000241081	126.603	-0.281892	0.173967	-1.62037	0.105153	0.923759
ENSG00000171940	1371.7	-0.280827	0.136305	-2.06029	0.0393713	0.623693
ENSG00000214078	1073.1	-0.280528	0.12693	-2.21009	0.0270986	0.507646
ENSG00000140368	11.106	-0.280434	0.149784	-1.87226	0.0611709	0.761536
ENSG00000196220	80.3581	-0.280262	0.182223	-1.53802	0.124044	0.963453
ENSG00000197410	27.5575	-0.27968	0.177649	-1.57433	0.11541	0.945722
ENSG00000155099	357.88	-0.279642	0.149786	-1.86695	0.0619087	0.764852
ENSG00000150625	49.8004	-0.279572	0.187302	-1.49262	0.135536	0.985915
ENSG00000226259	10.2161	-0.279424	0.144065	-1.93958	0.0524311	0.719122
ENSG00000185304	3.89946	-0.278304	0.098129	-2.8361	0.00456681	0.161941
ENSG00000241255	38.3869	-0.278234	0.18603	-1.49564	0.134748	0.984545
ENSG00000183077	304.414	-0.278065	0.145778	-1.90745	0.0564619	0.734178
ENSG00000233762	611.107	-0.278021	0.135729	-2.04835	0.0405261	0.630288
ENSG00000211456	973.307	-0.277148	0.121616	-2.27887	0.0226745	0.457048
ENSG00000204851	13.0808	-0.277125	0.153186	-1.80908	0.0704391	0.815053
ENSG00000187630	38.0244	-0.277083	0.186729	-1.48387	0.137843	0.9905
ENSG00000100033	260.935	-0.276796	0.172867	-1.60121	0.109331	0.936076
ENSG00000139200	116.078	-0.276522	0.175748	-1.5734	0.115625	0.945722
ENSG00000092036	228.513	-0.276458	0.157876	-1.75111	0.0799276	0.845514
ENSG00000104976	181.204	-0.275394	0.169691	-1.62292	0.104606	0.923759
ENSG00000198468	136.829	-0.27533	0.173167	-1.58997	0.111841	0.940142
ENSG00000213866	1142.04	-0.27518	0.118833	-2.31569	0.020575	0.43129
ENSG00000177764	17.5167	-0.275044	0.166338	-1.65353	0.0982227	0.909602
ENSG00000225031	416.791	-0.275017	0.143542	-1.91594	0.0553727	0.733016
ENSG00000164142	303.668	-0.27485	0.167182	-1.64402	0.100173	0.913173
ENSG00000134574	578.563	-0.274541	0.152562	-1.79953	0.0719349	0.821196
ENSG00000139239	1760.27	-0.274496	0.12046	-2.27873	0.0226829	0.457048
ENSG00000141096	141.045	-0.274492	0.175026	-1.56829	0.116813	0.94905
ENSG00000005108	16.3578	-0.274217	0.156524	-1.75192	0.079788	0.845471
ENSG00000167972	288.965	-0.274137	0.173931	-1.57613	0.114996	0.945722
ENSG00000163535	457.939	-0.273994	0.145992	-1.87678	0.0605482	0.756119
ENSG00000162244	3855.52	-0.273772	0.112489	-2.43378	0.014942	0.356702
ENSG00000105372	8867.4	-0.273626	0.113091	-2.41953	0.0155407	0.365229
ENSG00000113916	59.5243	-0.273505	0.187369	-1.45971	0.144369	0.999176
ENSG00000156671	418.112	-0.273448	0.144978	-1.88614	0.0592759	0.749122
ENSG00000135709	69.9028	-0.273161	0.186092	-1.46788	0.142137	0.997118
ENSG00000129038	84.2817	-0.273016	0.181481	-1.50438	0.132484	0.982837
ENSG00000031081	71.3817	-0.272821	0.184926	-1.4753	0.140131	0.994439
ENSG00000105290	168.519	-0.27279	0.165983	-1.64348	0.100283	0.913173
ENSG00000174444	21688.1	-0.272722	0.108324	-2.51765	0.011814	0.309363
ENSG00000270696	191.885	-0.272358	0.174008	-1.56521	0.117535	0.94928
ENSG00000183826	66.5035	-0.272027	0.185567	-1.46593	0.142668	0.998498
ENSG00000112039	194.939	-0.271813	0.165389	-1.64348	0.100283	0.913173
ENSG00000151948	86.9808	-0.271672	0.179935	-1.50983	0.131086	0.978969
ENSG00000239345	25.3164	-0.271657	0.180228	-1.5073	0.131734	0.980002
ENSG00000227081	666.054	-0.271559	0.134338	-2.02147	0.0432315	0.651766
ENSG00000135423	240.664	-0.271555	0.17245	-1.57469	0.115328	0.945722
ENSG00000164713	248.838	-0.271496	0.152992	-1.77457	0.0759682	0.834422
ENSG00000066027	671.178	-0.271341	0.1285	-2.11161	0.0347198	0.585694
ENSG00000150403	534.824	-0.271302	0.135425	-2.00333	0.0451421	0.666982
ENSG00000166260	412.903	-0.271232	0.143822	-1.88588	0.0593106	0.749122
ENSG00000130304	127.072	-0.270799	0.178574	-1.51645	0.129405	0.976386
ENSG00000197769	19.2619	-0.270721	0.167008	-1.621	0.105017	0.923759
ENSG00000134030	126.988	-0.270543	0.171444	-1.57803	0.114559	0.945722
ENSG00000133243	1227.48	-0.270405	0.138723	-1.94924	0.0512663	0.711749
ENSG00000238430	4.1873	-0.270285	0.101368	-2.66637	0.00766749	0.234306
ENSG00000116809	137.407	-0.26997	0.168603	-1.60122	0.109328	0.936076
ENSG00000173531	22.3337	-0.269274	0.176397	-1.52652	0.12688	0.973734
ENSG00000068078	189.398	-0.269125	0.164677	-1.63426	0.102204	0.918975
ENSG00000049239	349.745	-0.269051	0.177115	-1.51908	0.128742	0.976386
ENSG00000224722	32.3679	-0.268865	0.185112	-1.45244	0.146379	0.999176
ENSG00000165434	843.985	-0.268805	0.125213	-2.14679	0.03181	0.566358
ENSG00000133247	180.506	-0.268718	0.177252	-1.51603	0.129513	0.976386
ENSG00000165714	89.3881	-0.268464	0.183382	-1.46396	0.143204	0.998897
ENSG00000187109	12583.5	-0.268394	0.107437	-2.49816	0.012484	0.319053
ENSG00000171798	149.218	-0.26831	0.172395	-1.55637	0.11962	0.951428
ENSG00000147535	374.623	-0.268282	0.148618	-1.80518	0.0710461	0.816806
ENSG00000219451	299.775	-0.268208	0.152526	-1.75843	0.0786738	0.843955
ENSG00000215845	152.589	-0.267816	0.177555	-1.50835	0.131465	0.979714
ENSG00000214612	154.06	-0.267712	0.169091	-1.58324	0.113367	0.945722
ENSG00000095139	2612.36	-0.267584	0.126018	-2.12338	0.0337218	0.577843
ENSG00000104059	143.149	-0.267441	0.167865	-1.59319	0.111117	0.940142
ENSG00000137185	129.55	-0.26705	0.175406	-1.52247	0.127892	0.974098
ENSG00000135547	86.1376	-0.266741	0.18103	-1.47346	0.140627	0.994439
ENSG00000139624	485.556	-0.266706	0.135232	-1.97221	0.0485857	0.694866
ENSG00000224058	30.6548	-0.266467	0.184477	-1.44445	0.148613	0.999176
ENSG00000128487	945.978	-0.266114	0.124425	-2.13875	0.0324556	0.573503
ENSG00000157326	38.0266	-0.265283	0.186574	-1.42187	0.155065	0.999176
ENSG00000132970	728.04	-0.265232	0.127234	-2.0846	0.0371056	0.606113
ENSG00000124496	605.578	-0.265176	0.134438	-1.97247	0.0485557	0.694866
ENSG00000225912	135.917	-0.264956	0.170233	-1.55643	0.119606	0.951428
ENSG00000248175	17.1445	-0.264832	0.166612	-1.58951	0.111945	0.940142
ENSG00000171368	13.1393	-0.264743	0.157254	-1.68354	0.0922712	0.890333
ENSG00000019505	322.877	-0.264741	0.163371	-1.62049	0.105127	0.923759
ENSG00000233139	3.93657	-0.264016	0.100655	-2.62297	0.00871669	0.255261
ENSG00000258445	25.2781	-0.263512	0.180118	-1.463	0.143469	0.998897
ENSG00000132128	749.599	-0.263473	0.133425	-1.97469	0.0483031	0.693812
ENSG00000125846	162.688	-0.26336	0.165343	-1.59281	0.111203	0.940142
ENSG00000112796	156.295	-0.263245	0.169423	-1.55378	0.120237	0.952772
ENSG00000106524	190.933	-0.263204	0.162523	-1.61949	0.105341	0.923759
ENSG00000128266	136.623	-0.262966	0.169237	-1.55383	0.120225	0.952772
ENSG00000126368	77.1184	-0.262878	0.185179	-1.41959	0.155728	0.999176
ENSG00000091129	71.4183	-0.262702	0.185013	-1.41991	0.155635	0.999176
ENSG00000224861	521.266	-0.262427	0.138176	-1.89922	0.0575358	0.739614
ENSG00000166869	7.63536	-0.262318	0.12277	-2.13666	0.0326257	0.574034
ENSG00000187764	721.673	-0.262273	0.13306	-1.97109	0.0487137	0.694866
ENSG00000225674	178.744	-0.262164	0.164685	-1.59191	0.111404	0.940142
ENSG00000091136	1221.49	-0.262068	0.147069	-1.78194	0.0747593	0.831064
ENSG00000141504	264.681	-0.261854	0.153298	-1.70814	0.0876104	0.874614
ENSG00000116350	1100.97	-0.261635	0.125734	-2.08086	0.037447	0.608772
ENSG00000185043	145.533	-0.261612	0.167169	-1.56496	0.117592	0.94928
ENSG00000071894	1431.51	-0.261324	0.130734	-1.99889	0.0456199	0.672291
ENSG00000117266	531.423	-0.261158	0.145248	-1.79801	0.0721752	0.821934
ENSG00000189060	2706.54	-0.261109	0.159039	-1.64179	0.100634	0.913173
ENSG00000139835	242.148	-0.261095	0.161802	-1.61367	0.106599	0.928097
ENSG00000236088	25.7539	-0.261075	0.180485	-1.44652	0.148032	0.999176
ENSG00000158805	34.461	-0.261013	0.18519	-1.40943	0.158708	0.999176
ENSG00000138768	3467.85	-0.260854	0.116833	-2.2327	0.0255685	0.491212
ENSG00000164615	499.139	-0.260082	0.145878	-1.78287	0.0746079	0.830543
ENSG00000141337	55.8762	-0.260013	0.187214	-1.38885	0.164878	0.999176
ENSG00000175894	15.1167	-0.260011	0.157459	-1.6513	0.0986777	0.910472
ENSG00000149212	635.045	-0.259927	0.140764	-1.84655	0.0648127	0.781583
ENSG00000178999	1102.76	-0.259718	0.120553	-2.15438	0.0312102	0.56096
ENSG00000184949	22.8042	-0.259666	0.175436	-1.48012	0.138842	0.992123
ENSG00000174099	19.2504	-0.25943	0.165031	-1.57201	0.115947	0.945722
ENSG00000188206	47.8652	-0.259337	0.18634	-1.39174	0.164001	0.999176
ENSG00000185668	263.831	-0.259287	0.162247	-1.5981	0.11002	0.93677
ENSG00000185641	752.316	-0.259233	0.135704	-1.91028	0.0560973	0.733364
ENSG00000233593	10.4291	-0.259035	0.133823	-1.93566	0.0529099	0.722136
ENSG00000137872	60.1778	-0.259001	0.187034	-1.38478	0.166119	0.999176
ENSG00000088451	210.618	-0.25894	0.158538	-1.6333	0.102406	0.919298
ENSG00000173926	69.2128	-0.258864	0.185888	-1.39258	0.163746	0.999176
ENSG00000188153	349.578	-0.2588	0.143768	-1.80012	0.071842	0.820874
ENSG00000179406	32.7733	-0.258792	0.181627	-1.42485	0.154201	0.999176
ENSG00000100568	458.175	-0.258688	0.135599	-1.90774	0.0564254	0.734178
ENSG00000115268	3014.17	-0.258654	0.123439	-2.0954	0.0361353	0.59889
ENSG00000172264	19.2905	-0.258211	0.168971	-1.52814	0.126479	0.973236
ENSG00000224781	26.3156	-0.258102	0.179879	-1.43486	0.151326	0.999176
ENSG00000213465	747.124	-0.257988	0.136487	-1.8902	0.0587312	0.745544
ENSG00000136828	352.686	-0.257518	0.149402	-1.72366	0.0847687	0.862999
ENSG00000100290	23.8437	-0.257513	0.170526	-1.51011	0.131016	0.978943
ENSG00000184500	17.8748	-0.257485	0.170343	-1.51157	0.130644	0.978943
ENSG00000167110	624.111	-0.257455	0.163976	-1.57008	0.116398	0.947038
ENSG00000213983	122.213	-0.257144	0.171808	-1.4967	0.134472	0.984545
ENSG00000235065	44.7683	-0.257112	0.187336	-1.37247	0.169919	0.999176
ENSG00000197415	146.797	-0.256875	0.169054	-1.51949	0.12864	0.976386
ENSG00000175634	246.578	-0.256814	0.155604	-1.65044	0.0988537	0.910472
ENSG00000065882	1387.34	-0.256656	0.13487	-1.90298	0.0570435	0.736129
ENSG00000235162	175.499	-0.256526	0.165901	-1.54626	0.122043	0.960699
ENSG00000170340	621.993	-0.256504	0.132893	-1.93015	0.0535879	0.724368
ENSG00000135778	701.98	-0.256446	0.134518	-1.9064	0.0565977	0.735381
ENSG00000115738	343.625	-0.256222	0.151438	-1.69192	0.0906605	0.884257
ENSG00000172733	64.3628	-0.256076	0.185652	-1.37934	0.167791	0.999176
ENSG00000177410	1149.66	-0.255884	0.13631	-1.87722	0.0604876	0.755917
ENSG00000129083	1551.33	-0.255765	0.131079	-1.95122	0.0510308	0.711243
ENSG00000077782	5405.65	-0.255724	0.122921	-2.08039	0.0374899	0.608832
ENSG00000087206	482.14	-0.255558	0.137053	-1.86467	0.0622278	0.766382
ENSG00000070718	191.657	-0.255528	0.161436	-1.58284	0.113457	0.945722
ENSG00000007341	71.408	-0.255162	0.185106	-1.37846	0.16806	0.999176
ENSG00000237214	67.8338	-0.25499	0.184915	-1.37895	0.167909	0.999176
ENSG00000115944	1021.07	-0.254916	0.121819	-2.09258	0.0363866	0.601298
ENSG00000225159	826.503	-0.254772	0.124646	-2.04398	0.040956	0.633738
ENSG00000156976	6727.65	-0.254723	0.147349	-1.72871	0.0838615	0.860698
ENSG00000140262	1420.97	-0.254659	0.123276	-2.06576	0.0388508	0.62092
ENSG00000172819	717.053	-0.254621	0.12613	-2.01871	0.0435172	0.654334
ENSG00000147677	3099.55	-0.254603	0.114117	-2.23106	0.0256768	0.491615
ENSG00000248605	83.8663	-0.254497	0.186987	-1.36104	0.173502	0.999176
ENSG00000166689	179.741	-0.254451	0.16445	-1.54729	0.121794	0.960192
ENSG00000079313	335.166	-0.254289	0.15163	-1.67704	0.0935356	0.891916
ENSG00000122406	12944.6	-0.253781	0.105001	-2.41693	0.0156521	0.366963
ENSG00000236924	16.9821	-0.253625	0.167771	-1.51174	0.130601	0.978943
ENSG00000014138	426.602	-0.253518	0.142724	-1.77628	0.0756867	0.834422
ENSG00000092096	344.349	-0.253491	0.150608	-1.68312	0.0923517	0.890605
ENSG00000143437	543.499	-0.253327	0.134648	-1.8814	0.0599174	0.753216
ENSG00000106278	4001.4	-0.253168	0.13208	-1.91677	0.0552668	0.733016
ENSG00000175155	71.3225	-0.253154	0.183654	-1.37843	0.16807	0.999176
ENSG00000165698	10.3803	-0.252986	0.142451	-1.77596	0.07574	0.834422
ENSG00000240376	379.058	-0.252798	0.142071	-1.77937	0.0751788	0.832001
ENSG00000174307	217.145	-0.252582	0.164193	-1.53832	0.12397	0.963453
ENSG00000182841	43.4713	-0.252539	0.187302	-1.3483	0.177562	0.999176
ENSG00000213420	474.303	-0.252417	0.161779	-1.56026	0.118699	0.949689
ENSG00000198420	258.235	-0.25235	0.16072	-1.57012	0.116386	0.947038
ENSG00000105355	609.4	-0.252238	0.129531	-1.94732	0.0514968	0.713091
ENSG00000120784	89.7107	-0.25219	0.181259	-1.39132	0.164128	0.999176
ENSG00000070785	305.816	-0.252074	0.146102	-1.72533	0.0844677	0.862779
ENSG00000130158	410.999	-0.251904	0.150392	-1.67498	0.0939382	0.891916
ENSG00000103460	252.146	-0.251708	0.151824	-1.65789	0.0973392	0.905282
ENSG00000107404	469.219	-0.251648	0.136571	-1.84261	0.0653861	0.785417
ENSG00000226383	23.9871	-0.251428	0.177423	-1.41711	0.15645	0.999176
ENSG00000240616	81.0014	-0.251387	0.181889	-1.38209	0.166945	0.999176
ENSG00000236801	412.257	-0.25138	0.137669	-1.82597	0.0678544	0.800381
ENSG00000118620	136.994	-0.251339	0.168437	-1.49218	0.135652	0.985915
ENSG00000128512	286.024	-0.251327	0.154757	-1.62402	0.104373	0.923759
ENSG00000175216	4185.2	-0.251171	0.128612	-1.95294	0.0508271	0.709702
ENSG00000124343	17.5078	-0.25111	0.163045	-1.54013	0.123529	0.963411
ENSG00000204524	35.0197	-0.251069	0.186138	-1.34883	0.177392	0.999176
ENSG00000106012	48.5221	-0.251031	0.186857	-1.34344	0.17913	0.999176
ENSG00000164983	215.582	-0.250814	0.161068	-1.5572	0.119424	0.951199
ENSG00000213371	82.8696	-0.250759	0.182553	-1.37362	0.169558	0.999176
ENSG00000115318	250.216	-0.250718	0.152257	-1.64668	0.0996244	0.912789
ENSG00000133424	849.151	-0.250374	0.131067	-1.91028	0.0560977	0.733364
ENSG00000101473	170.005	-0.250175	0.163638	-1.52883	0.126305	0.972781
ENSG00000116514	186.346	-0.250113	0.160093	-1.5623	0.118218	0.94928
ENSG00000169220	162.419	-0.25001	0.170608	-1.4654	0.142811	0.998883
ENSG00000237978	36.7829	-0.250001	0.18581	-1.34547	0.178474	0.999176
ENSG00000246596	7.45762	-0.24997	0.133019	-1.87921	0.0602157	0.754932
ENSG00000136436	254.661	-0.249835	0.162035	-1.54186	0.123107	0.962016
ENSG00000158863	80.1577	-0.249682	0.186039	-1.34209	0.179566	0.999176
ENSG00000180211	110.957	-0.249296	0.17493	-1.42512	0.154123	0.999176
ENSG00000170222	64.3554	-0.249296	0.185649	-1.34283	0.179326	0.999176
ENSG00000161328	16.173	-0.249225	0.165899	-1.50226	0.133029	0.98341
ENSG00000166313	394.227	-0.248925	0.143844	-1.73052	0.0835366	0.859659
ENSG00000065989	93.0592	-0.248755	0.186542	-1.3335	0.182367	0.999176
ENSG00000078043	519.02	-0.248665	0.140386	-1.77129	0.0765123	0.836311
ENSG00000230508	25.0931	-0.248428	0.17995	-1.38054	0.167421	0.999176
ENSG00000138061	67.5278	-0.248085	0.186796	-1.32811	0.184142	0.999176
ENSG00000161835	26.3428	-0.248077	0.180235	-1.3764	0.168697	0.999176
ENSG00000178038	56.761	-0.248044	0.187342	-1.32402	0.185498	0.999176
ENSG00000269131	37.8174	-0.24789	0.186426	-1.3297	0.183617	0.999176
ENSG00000232320	23.3317	-0.24739	0.178826	-1.38341	0.166539	0.999176
ENSG00000089009	3268.86	-0.247353	0.111314	-2.22212	0.0262753	0.499422
ENSG00000130055	420.622	-0.247286	0.13927	-1.77559	0.0758009	0.834422
ENSG00000159685	344.847	-0.247094	0.154903	-1.59516	0.110677	0.938609
ENSG00000108509	70.0561	-0.246915	0.186064	-1.32704	0.184495	0.999176
ENSG00000197265	358.302	-0.246723	0.145611	-1.69439	0.090191	0.882265
ENSG00000174460	28.5995	-0.246614	0.18292	-1.34821	0.177592	0.999176
ENSG00000186523	13.5824	-0.246587	0.158581	-1.55496	0.119955	0.952772
ENSG00000110811	368.274	-0.246579	0.14759	-1.6707	0.0947809	0.894692
ENSG00000177105	221.26	-0.246276	0.157653	-1.56214	0.118256	0.94928
ENSG00000214389	169.905	-0.245926	0.171175	-1.43669	0.150805	0.999176
ENSG00000148737	722.035	-0.245924	0.146145	-1.68274	0.0924256	0.890813
ENSG00000131165	650.121	-0.245863	0.147219	-1.67005	0.0949093	0.894692
ENSG00000144485	230.655	-0.245723	0.153747	-1.59822	0.109993	0.93677
ENSG00000024422	230.792	-0.245625	0.172072	-1.42745	0.153449	0.999176
ENSG00000135090	63.7277	-0.2456	0.186892	-1.31413	0.188803	0.999176
ENSG00000171681	1869.44	-0.245485	0.155303	-1.58068	0.113952	0.945722
ENSG00000111801	14.5079	-0.245455	0.162409	-1.51134	0.130701	0.978943
ENSG00000071082	5996.54	-0.24517	0.106436	-2.30344	0.0212539	0.440809
ENSG00000116670	1677.31	-0.245135	0.119273	-2.05524	0.0398558	0.626395
ENSG00000230091	18.9912	-0.24507	0.173042	-1.41624	0.156704	0.999176
ENSG00000179889	1331.71	-0.245005	0.118923	-2.0602	0.0393794	0.623693
ENSG00000149541	197.913	-0.244988	0.160051	-1.53069	0.125846	0.970556
ENSG00000188985	275.905	-0.244913	0.151965	-1.61164	0.10704	0.928677
ENSG00000169495	4.54504	-0.244858	0.110069	-2.22458	0.0261092	0.497654
ENSG00000196535	434.066	-0.244611	0.145998	-1.67544	0.0938475	0.891916
ENSG00000144747	305.01	-0.244511	0.168958	-1.44717	0.147848	0.999176
ENSG00000189430	7.92108	-0.244213	0.134623	-1.81405	0.0696701	0.810566
ENSG00000165661	476.846	-0.243879	0.134462	-1.81374	0.0697179	0.810566
ENSG00000125246	117.145	-0.243838	0.178354	-1.36716	0.171575	0.999176
ENSG00000162174	107.879	-0.243585	0.175485	-1.38807	0.165117	0.999176
ENSG00000245910	338.988	-0.243331	0.143545	-1.69515	0.0900466	0.881877
ENSG00000197283	8.12474	-0.243315	0.137594	-1.76835	0.0770023	0.836767
ENSG00000178947	116.208	-0.243177	0.18307	-1.32832	0.184072	0.999176
ENSG00000070610	967.397	-0.242988	0.123331	-1.97021	0.0488139	0.694866
ENSG00000105829	311.882	-0.242923	0.14643	-1.65897	0.0971214	0.904323
ENSG00000099284	251.471	-0.242754	0.159088	-1.52591	0.127032	0.973734
ENSG00000128849	1392.89	-0.242744	0.126905	-1.9128	0.0557732	0.733116
ENSG00000084072	466.981	-0.242637	0.143593	-1.68976	0.0910743	0.886105
ENSG00000120875	299.085	-0.242384	0.151512	-1.59977	0.109649	0.936447
ENSG00000150459	1739.47	-0.242317	0.126416	-1.91682	0.0552602	0.733016
ENSG00000215492	10.1941	-0.241862	0.145235	-1.66532	0.0958484	0.898666
ENSG00000171295	78.4476	-0.241835	0.184023	-1.31416	0.188793	0.999176
ENSG00000013392	92.3924	-0.241833	0.17909	-1.35035	0.176905	0.999176
ENSG00000181690	264.822	-0.241804	0.155453	-1.55548	0.119833	0.952672
ENSG00000174021	722.283	-0.241787	0.126175	-1.91629	0.0553286	0.733016
ENSG00000219545	121.684	-0.241615	0.177476	-1.36139	0.173389	0.999176
ENSG00000073169	130.011	-0.241609	0.175234	-1.37878	0.167963	0.999176
ENSG00000196865	356.561	-0.241481	0.14601	-1.65387	0.0981546	0.909466
ENSG00000151693	206.585	-0.241451	0.16219	-1.48869	0.136568	0.987532
ENSG00000164199	614.844	-0.241445	0.151799	-1.59056	0.111709	0.940142
ENSG00000218426	1503.25	-0.241286	0.115561	-2.08795	0.0368025	0.605678
ENSG00000197329	1078.87	-0.24125	0.130423	-1.84975	0.0643494	0.780121
ENSG00000152642	88.5911	-0.241178	0.180076	-1.33931	0.18047	0.999176
ENSG00000198075	26.7954	-0.241122	0.179414	-1.34394	0.178967	0.999176
ENSG00000231767	324.935	-0.241003	0.149423	-1.61289	0.106769	0.928677
ENSG00000231848	34.463	-0.240994	0.185809	-1.297	0.194631	0.999176
ENSG00000244187	174.935	-0.240953	0.163429	-1.47436	0.140384	0.994439
ENSG00000225968	33.6207	-0.240928	0.182796	-1.31802	0.187498	0.999176
ENSG00000256053	91.2604	-0.240569	0.181342	-1.3266	0.18464	0.999176
ENSG00000003400	35.481	-0.240368	0.185744	-1.29408	0.195638	0.999176
ENSG00000063177	6544.19	-0.240349	0.120079	-2.00158	0.0453296	0.668592
ENSG00000196684	18.6129	-0.240341	0.170475	-1.40983	0.15859	0.999176
ENSG00000164970	198.574	-0.240318	0.160092	-1.50112	0.133325	0.98341
ENSG00000131914	21936.5	-0.240129	0.104916	-2.28878	0.0220919	0.450216
ENSG00000137936	103.2	-0.240039	0.17821	-1.34695	0.177998	0.999176
ENSG00000078061	417.657	-0.240022	0.139888	-1.71582	0.0861952	0.86761
ENSG00000165113	64.2765	-0.239794	0.186559	-1.28536	0.198668	0.999176
ENSG00000253336	113.216	-0.239786	0.173812	-1.37957	0.167718	0.999176
ENSG00000135749	755.067	-0.239643	0.146165	-1.63954	0.101102	0.9138
ENSG00000234616	421.2	-0.239589	0.146206	-1.63871	0.101274	0.9138
ENSG00000145214	105.572	-0.239376	0.179252	-1.33541	0.181741	0.999176
ENSG00000101144	118.588	-0.239373	0.183595	-1.30381	0.192298	0.999176
ENSG00000155367	134.088	-0.239063	0.179688	-1.33044	0.183375	0.999176
ENSG00000160949	510.494	-0.23899	0.135464	-1.76423	0.077693	0.839627
ENSG00000162927	30.6446	-0.238713	0.183018	-1.30431	0.192128	0.999176
ENSG00000112619	13.3676	-0.238262	0.159241	-1.49624	0.134591	0.984545
ENSG00000157111	8.41855	-0.238252	0.132636	-1.79628	0.0724494	0.822655
ENSG00000142937	11631.5	-0.238155	0.105737	-2.25233	0.0243011	0.478184
ENSG00000166863	92.2406	-0.23811	0.179559	-1.32609	0.184811	0.999176
ENSG00000129245	437.431	-0.238083	0.135894	-1.75197	0.0797789	0.845471
ENSG00000232346	566.921	-0.238002	0.136278	-1.74645	0.0807335	0.847204
ENSG00000084092	544.834	-0.237821	0.146653	-1.62165	0.104878	0.923759
ENSG00000254860	8.14827	-0.237741	0.13705	-1.73471	0.0827931	0.855198
ENSG00000176845	111.843	-0.237724	0.181815	-1.30751	0.191041	0.999176
ENSG00000197858	451.584	-0.237549	0.145836	-1.62887	0.10334	0.921932
ENSG00000011347	265.744	-0.237302	0.176216	-1.34666	0.178091	0.999176
ENSG00000108828	2935.82	-0.237243	0.117496	-2.01916	0.0434708	0.654215
ENSG00000143387	113.053	-0.237154	0.17467	-1.35773	0.17455	0.999176
ENSG00000111859	132.671	-0.237061	0.176491	-1.34319	0.179209	0.999176
ENSG00000198719	21.3251	-0.237033	0.170038	-1.394	0.163318	0.999176
ENSG00000157214	201.835	-0.236897	0.174043	-1.36114	0.17347	0.999176
ENSG00000198844	17.6979	-0.236821	0.166839	-1.41946	0.155765	0.999176
ENSG00000108107	5991.01	-0.236645	0.11805	-2.00462	0.0450039	0.66613
ENSG00000163820	258.663	-0.236565	0.167155	-1.41524	0.156997	0.999176
ENSG00000143761	3127.8	-0.236521	0.112304	-2.10607	0.0351981	0.589671
ENSG00000198189	126.834	-0.236303	0.176018	-1.3425	0.179435	0.999176
ENSG00000134698	244.858	-0.236123	0.157929	-1.49512	0.134883	0.984916
ENSG00000075415	4577.26	-0.236047	0.107796	-2.18975	0.0285423	0.526346
ENSG00000244313	3013.41	-0.236035	0.109117	-2.16313	0.0305309	0.553426
ENSG00000177556	250.141	-0.236023	0.150925	-1.56384	0.117855	0.94928
ENSG00000067221	34.0216	-0.23583	0.182992	-1.28875	0.197486	0.999176
ENSG00000112697	1575.4	-0.2358	0.133274	-1.76928	0.076847	0.836767
ENSG00000003436	30.8128	-0.235783	0.175593	-1.34278	0.179342	0.999176
ENSG00000115271	429.155	-0.235734	0.13788	-1.70971	0.08732	0.873939
ENSG00000117691	205.693	-0.235341	0.15917	-1.47855	0.139261	0.993314
ENSG00000150967	30.5342	-0.235241	0.182811	-1.2868	0.198164	0.999176
ENSG00000233461	23.4306	-0.235175	0.175741	-1.33819	0.180835	0.999176
ENSG00000172890	369.542	-0.235059	0.142887	-1.64507	0.0999558	0.913173
ENSG00000156603	93.6784	-0.23502	0.183407	-1.28141	0.200049	0.999176
ENSG00000185737	34.5256	-0.234903	0.184741	-1.27153	0.203541	0.999176
ENSG00000147905	348.878	-0.234799	0.142301	-1.65001	0.0989401	0.910472
ENSG00000224934	16.1974	-0.234779	0.16217	-1.44773	0.147692	0.999176
ENSG00000100300	88.068	-0.234733	0.185991	-1.26206	0.206926	0.999176
ENSG00000127948	1133.77	-0.234698	0.12053	-1.94722	0.0515078	0.713091
ENSG00000183844	16.0683	-0.234627	0.165542	-1.41732	0.156389	0.999176
ENSG00000163683	500.937	-0.234625	0.149254	-1.57199	0.115953	0.945722
ENSG00000114391	5538.2	-0.234278	0.108853	-2.15224	0.0313783	0.561609
ENSG00000139973	12.8079	-0.234194	0.154912	-1.51179	0.130588	0.978943
ENSG00000147145	95.0529	-0.234003	0.179936	-1.30048	0.193436	0.999176
ENSG00000256417	9.37174	-0.233878	0.141682	-1.65072	0.098795	0.910472
ENSG00000226243	52.6176	-0.233763	0.187045	-1.24977	0.211385	0.999176
ENSG00000171517	241.907	-0.233583	0.158517	-1.47355	0.140602	0.994439
ENSG00000123427	43.6835	-0.233489	0.186503	-1.25193	0.210594	0.999176
ENSG00000100330	395.808	-0.233433	0.143958	-1.62153	0.104905	0.923759
ENSG00000175198	607.942	-0.233288	0.140215	-1.66379	0.0961542	0.900534
ENSG00000099953	87.4956	-0.232859	0.181699	-1.28156	0.199996	0.999176
ENSG00000108599	357.062	-0.232857	0.156241	-1.49037	0.136127	0.986624
ENSG00000100316	23806.2	-0.232599	0.114505	-2.03134	0.0422208	0.64332
ENSG00000226268	59.0725	-0.232536	0.186353	-1.24783	0.212093	0.999176
ENSG00000182508	25.2968	-0.232369	0.177878	-1.30633	0.191439	0.999176
ENSG00000198961	1475.22	-0.232007	0.147448	-1.57349	0.115605	0.945722
ENSG00000243680	74.2483	-0.231469	0.184436	-1.25501	0.209474	0.999176
ENSG00000167196	609.043	-0.231283	0.129977	-1.77941	0.0751721	0.832001
ENSG00000102103	339.952	-0.231231	0.15732	-1.46981	0.141612	0.995615
ENSG00000147894	293.143	-0.231124	0.147387	-1.56815	0.116847	0.94905
ENSG00000197961	653.568	-0.231038	0.141842	-1.62885	0.103346	0.921932
ENSG00000168884	297.931	-0.230898	0.152235	-1.51672	0.129336	0.976386
ENSG00000174989	365.02	-0.230835	0.146255	-1.57831	0.114495	0.945722
ENSG00000165061	176.521	-0.230776	0.165142	-1.39744	0.16228	0.999176
ENSG00000170469	52.191	-0.230727	0.187185	-1.23261	0.21772	0.999176
ENSG00000126858	645.912	-0.230626	0.143439	-1.60784	0.107871	0.930596
ENSG00000176209	313.748	-0.23057	0.15586	-1.47934	0.13905	0.99319
ENSG00000196511	23.4627	-0.230368	0.176677	-1.30389	0.19227	0.999176
ENSG00000239467	52.1683	-0.230212	0.18731	-1.22904	0.219055	0.999176
ENSG00000151779	769.133	-0.230206	0.141939	-1.62186	0.104833	0.923759
ENSG00000127903	3.7357	-0.230164	0.0999625	-2.3025	0.0213068	NA
ENSG00000108799	210.842	-0.230109	0.158912	-1.44803	0.14761	0.999176
ENSG00000116199	862.304	-0.230104	0.123506	-1.86311	0.0624474	0.767487
ENSG00000242259	294.252	-0.230076	0.149998	-1.53386	0.125064	0.968915
ENSG00000042445	181.125	-0.230056	0.174395	-1.31917	0.187113	0.999176
ENSG00000174456	130.45	-0.230051	0.185348	-1.24119	0.214537	0.999176
ENSG00000164975	453.871	-0.229984	0.153969	-1.4937	0.135254	0.985606
ENSG00000184371	34.3334	-0.229864	0.18537	-1.24003	0.214965	0.999176
ENSG00000174939	87.2006	-0.229789	0.182354	-1.26013	0.207623	0.999176
ENSG00000114331	642.456	-0.229772	0.132623	-1.73252	0.0831806	0.856693
ENSG00000007080	474.897	-0.229765	0.138252	-1.66193	0.0965272	0.902742
ENSG00000126005	124.363	-0.229723	0.178526	-1.28677	0.198173	0.999176
ENSG00000104979	676.287	-0.229657	0.137421	-1.67119	0.0946834	0.894692
ENSG00000174233	183.852	-0.229651	0.161074	-1.42574	0.153942	0.999176
ENSG00000234773	3.46091	-0.229635	0.0943432	-2.43404	0.0149314	NA
ENSG00000188647	904.407	-0.229612	0.141535	-1.6223	0.10474	0.923759
ENSG00000136044	349.925	-0.229471	0.147669	-1.55395	0.120196	0.952772
ENSG00000149218	67.1164	-0.229453	0.184559	-1.24325	0.213775	0.999176
ENSG00000219928	54.2063	-0.229448	0.187201	-1.22567	0.220321	0.999176
ENSG00000072803	940.239	-0.229406	0.128758	-1.78168	0.0748011	0.831064
ENSG00000133027	248.959	-0.229232	0.157249	-1.45777	0.144905	0.999176
ENSG00000168005	1018.2	-0.229119	0.122019	-1.87773	0.0604177	0.755598
ENSG00000151743	54.3827	-0.228737	0.18693	-1.22365	0.221084	0.999176
ENSG00000163597	462.641	-0.228687	0.139524	-1.63905	0.101203	0.9138
ENSG00000160050	77.9972	-0.22839	0.183907	-1.24188	0.214281	0.999176
ENSG00000065978	8037.88	-0.228369	0.107042	-2.13346	0.0328867	0.574118
ENSG00000152078	50.5764	-0.22817	0.187036	-1.21993	0.222491	0.999176
ENSG00000146416	394.142	-0.227947	0.140751	-1.61951	0.105338	0.923759
ENSG00000162407	416.069	-0.227936	0.141508	-1.61076	0.107232	0.928857
ENSG00000152700	238.811	-0.227844	0.152204	-1.49697	0.134401	0.984545
ENSG00000114353	2630.59	-0.227629	0.112582	-2.0219	0.0431863	0.651662
ENSG00000106367	492.536	-0.227555	0.14454	-1.57434	0.115409	0.945722
ENSG00000163762	75.039	-0.227108	0.186803	-1.21576	0.224075	0.999176
ENSG00000230849	17.5783	-0.227068	0.169496	-1.33966	0.180354	0.999176
ENSG00000272695	10.1799	-0.22699	0.143539	-1.58138	0.113791	0.945722
ENSG00000269893	416.569	-0.226987	0.138496	-1.63894	0.101226	0.9138
ENSG00000154917	145.567	-0.226763	0.174133	-1.30225	0.192833	0.999176
ENSG00000258297	71.3457	-0.226751	0.183878	-1.23316	0.217517	0.999176
ENSG00000102977	243.578	-0.226667	0.15296	-1.48187	0.138374	0.9905
ENSG00000156508	28706.4	-0.22664	0.10992	-2.06187	0.0392205	0.622957
ENSG00000060642	156.832	-0.226554	0.180838	-1.25281	0.210276	0.999176
ENSG00000168795	343.635	-0.226537	0.146713	-1.54408	0.12257	0.962016
ENSG00000187550	10.9538	-0.226353	0.143794	-1.57414	0.115454	0.945722
ENSG00000155984	77.9061	-0.226344	0.183527	-1.2333	0.217465	0.999176
ENSG00000151665	108.737	-0.226286	0.179764	-1.2588	0.208104	0.999176
ENSG00000164597	346.324	-0.225877	0.144792	-1.56001	0.118757	0.949689
ENSG00000171097	317.558	-0.22587	0.15547	-1.45282	0.146273	0.999176
ENSG00000168487	61.4103	-0.225801	0.186595	-1.21011	0.226236	0.999176
ENSG00000084444	509.408	-0.225762	0.148037	-1.52504	0.12725	0.973734
ENSG00000095539	119.642	-0.22572	0.179801	-1.25539	0.209339	0.999176
ENSG00000235688	42.5864	-0.22569	0.184938	-1.22036	0.22233	0.999176
ENSG00000065357	159.906	-0.225678	0.172851	-1.30562	0.191681	0.999176
ENSG00000157927	35.9857	-0.225491	0.184726	-1.22068	0.222209	0.999176
ENSG00000144746	474.549	-0.22534	0.141196	-1.59593	0.110505	0.938609
ENSG00000186298	5833.82	-0.225187	0.113149	-1.99018	0.0465713	0.680468
ENSG00000177098	88.8998	-0.225133	0.181672	-1.23923	0.21526	0.999176
ENSG00000058668	446.789	-0.225044	0.167187	-1.34606	0.178283	0.999176
ENSG00000150457	444.834	-0.225034	0.143324	-1.57011	0.11639	0.947038
ENSG00000188234	3.12937	-0.224965	0.0892574	-2.5204	0.011722	NA
ENSG00000169900	11.1092	-0.224743	0.145749	-1.54199	0.123076	0.962016
ENSG00000139971	342.272	-0.224688	0.152677	-1.47166	0.141113	0.995265
ENSG00000155858	157.572	-0.224487	0.173655	-1.29272	0.196108	0.999176
ENSG00000248626	20.8499	-0.22447	0.174964	-1.28295	0.199511	0.999176
ENSG00000130962	134.621	-0.22419	0.169446	-1.32308	0.185809	0.999176
ENSG00000169855	1671.66	-0.224056	0.124684	-1.79699	0.0723375	0.821934
ENSG00000231302	29.3632	-0.223971	0.180637	-1.23989	0.215015	0.999176
ENSG00000110237	213.277	-0.22389	0.16683	-1.34203	0.179588	0.999176
ENSG00000103145	496.728	-0.223874	0.160383	-1.39587	0.162754	0.999176
ENSG00000157152	100.997	-0.223794	0.178483	-1.25387	0.209889	0.999176
ENSG00000171314	1842.44	-0.223523	0.116841	-1.91306	0.0557409	0.733116
ENSG00000142530	69.7221	-0.223468	0.187062	-1.19462	0.232236	0.999176
ENSG00000164053	124.721	-0.22331	0.173227	-1.28912	0.197357	0.999176
ENSG00000198937	83.1673	-0.223221	0.181074	-1.23276	0.217666	0.999176
ENSG00000215086	18.4941	-0.223218	0.17038	-1.31012	0.190157	0.999176
ENSG00000167074	330.758	-0.223203	0.164293	-1.35857	0.174284	0.999176
ENSG00000144895	1106.14	-0.223178	0.124651	-1.79042	0.0733859	0.82722
ENSG00000125821	694.188	-0.223138	0.130027	-1.71609	0.0861461	0.86761
ENSG00000148200	3878.99	-0.222955	0.10863	-2.05242	0.0401288	0.628875
ENSG00000100360	250.774	-0.22282	0.152819	-1.45806	0.144823	0.999176
ENSG00000237036	45.1064	-0.222792	0.185223	-1.20283	0.229042	0.999176
ENSG00000118402	184.429	-0.222759	0.162639	-1.36966	0.170794	0.999176
ENSG00000248932	16.83	-0.222554	0.16681	-1.33418	0.182146	0.999176
ENSG00000198720	227.253	-0.222518	0.159989	-1.39084	0.164275	0.999176
ENSG00000169857	197.583	-0.222501	0.163458	-1.36121	0.173448	0.999176
ENSG00000125652	228.488	-0.222474	0.170205	-1.30709	0.191182	0.999176
ENSG00000106554	1358.94	-0.222382	0.122095	-1.82139	0.0685471	0.803276
ENSG00000083807	99.0649	-0.222338	0.177622	-1.25175	0.210662	0.999176
ENSG00000133612	457.003	-0.222169	0.148336	-1.49774	0.1342	0.984545
ENSG00000153790	20.6556	-0.222096	0.174072	-1.27588	0.201997	0.999176
ENSG00000080561	20.1347	-0.222062	0.170817	-1.3	0.193601	0.999176
ENSG00000114790	210.486	-0.222056	0.162321	-1.36801	0.171309	0.999176
ENSG00000104408	5127.69	-0.221934	0.109994	-2.01769	0.0436237	0.654778
ENSG00000133103	296.153	-0.221884	0.146912	-1.51032	0.130962	0.978943
ENSG00000005206	267.92	-0.221806	0.16272	-1.36311	0.172846	0.999176
ENSG00000171105	576.033	-0.221752	0.154824	-1.43228	0.152064	0.999176
ENSG00000158715	169.88	-0.221675	0.162232	-1.36641	0.171811	0.999176
ENSG00000235174	1092.73	-0.221653	0.119703	-1.85169	0.0640699	0.780067
ENSG00000163956	564.835	-0.221532	0.136156	-1.62705	0.103726	0.923759
ENSG00000137944	586.023	-0.221375	0.134354	-1.6477	0.0994151	0.912789
ENSG00000125991	1203.66	-0.221287	0.120382	-1.83821	0.0660315	0.786411
ENSG00000174748	9865.38	-0.221008	0.108946	-2.02861	0.0424978	0.645853
ENSG00000186280	48.223	-0.220825	0.187321	-1.17886	0.238454	0.999176
ENSG00000164930	246.449	-0.220739	0.155019	-1.42394	0.154463	0.999176
ENSG00000157020	1271.4	-0.220665	0.127076	-1.73648	0.0824797	0.853955
ENSG00000212978	68.8322	-0.220509	0.184711	-1.1938	0.232554	0.999176
ENSG00000260230	14.6157	-0.220431	0.157705	-1.39774	0.16219	0.999176
ENSG00000129682	588.372	-0.220239	0.154476	-1.42572	0.15395	0.999176
ENSG00000213442	3026.04	-0.220037	0.113846	-1.93275	0.0532669	0.723841
ENSG00000167107	87.5405	-0.220026	0.180938	-1.21603	0.223973	0.999176
ENSG00000268658	56.546	-0.219995	0.187297	-1.17458	0.240164	0.999176
ENSG00000213889	96.6481	-0.219931	0.181332	-1.21286	0.225183	0.999176
ENSG00000179899	2065.91	-0.219909	0.14415	-1.52556	0.127121	0.973734
ENSG00000072952	82.8071	-0.21981	0.186965	-1.17567	0.239726	0.999176
ENSG00000235297	555.952	-0.219804	0.134416	-1.63525	0.101997	0.918079
ENSG00000178662	95.5189	-0.219673	0.180617	-1.21623	0.223896	0.999176
ENSG00000197756	10115.2	-0.219622	0.10899	-2.01507	0.0438978	0.657733
ENSG00000140939	29.77	-0.219601	0.176329	-1.24541	0.212982	0.999176
ENSG00000042317	86.0971	-0.219553	0.183548	-1.19616	0.231634	0.999176
ENSG00000182372	388.697	-0.219517	0.140452	-1.56294	0.118068	0.94928
ENSG00000268751	3.92729	-0.21945	0.101657	-2.15873	0.0308712	0.556626
ENSG00000100359	555.245	-0.219423	0.143924	-1.52457	0.127366	0.973734
ENSG00000147804	10.6936	-0.219395	0.149105	-1.47142	0.141179	0.995265
ENSG00000186063	205.095	-0.219394	0.159645	-1.37426	0.169361	0.999176
ENSG00000165985	30.29	-0.219368	0.180908	-1.2126	0.225284	0.999176
ENSG00000185156	50.3921	-0.219159	0.18719	-1.17078	0.241686	0.999176
ENSG00000270012	11.3702	-0.219095	0.14994	-1.46122	0.143956	0.999057
ENSG00000157426	251.617	-0.219026	0.157992	-1.38632	0.165651	0.999176
ENSG00000168899	5.74576	-0.21891	0.120242	-1.82058	0.0686701	0.803276
ENSG00000141560	223.586	-0.218808	0.15643	-1.39876	0.161884	0.999176
ENSG00000144026	80.6261	-0.218552	0.185632	-1.17734	0.239061	0.999176
ENSG00000143951	154.3	-0.218531	0.168684	-1.2955	0.195147	0.999176
ENSG00000102882	353.585	-0.218331	0.14698	-1.48545	0.137425	0.990306
ENSG00000078053	105.373	-0.218329	0.176676	-1.23576	0.216547	0.999176
ENSG00000126934	925.268	-0.218286	0.128597	-1.69744	0.0896131	0.880983
ENSG00000145945	21.3727	-0.218171	0.175257	-1.24486	0.213182	0.999176
ENSG00000148303	8515.27	-0.218164	0.116034	-1.88018	0.0600838	0.754751
ENSG00000131242	1235.91	-0.21816	0.118672	-1.83835	0.0660114	0.786411
ENSG00000178498	402.936	-0.218083	0.141469	-1.54157	0.123179	0.962016
ENSG00000167778	123.579	-0.218039	0.172294	-1.26551	0.20569	0.999176
ENSG00000078699	268.71	-0.217952	0.164123	-1.32798	0.184184	0.999176
ENSG00000124243	268.453	-0.21783	0.152811	-1.42549	0.154015	0.999176
ENSG00000005156	1216.99	-0.217755	0.12433	-1.75142	0.0798729	0.845471
ENSG00000137573	176.12	-0.217746	0.179006	-1.21642	0.223825	0.999176
ENSG00000203930	9.93051	-0.217734	0.142997	-1.52265	0.127847	0.974098
ENSG00000147119	124.369	-0.2177	0.175659	-1.23933	0.215223	0.999176
ENSG00000111110	656.019	-0.217698	0.129232	-1.68455	0.0920757	0.8901
ENSG00000172992	367.777	-0.217567	0.147486	-1.47517	0.140168	0.994439
ENSG00000225573	85.6294	-0.217495	0.180933	-1.20208	0.229334	0.999176
ENSG00000089351	1560.42	-0.217412	0.139981	-1.55316	0.120386	0.952887
ENSG00000104687	1085.72	-0.217116	0.126361	-1.71823	0.0857547	0.866249
ENSG00000080546	371.511	-0.217032	0.148548	-1.46102	0.144009	0.999057
ENSG00000130703	330.614	-0.217018	0.15008	-1.44601	0.148174	0.999176
ENSG00000264538	94.7874	-0.216844	0.179869	-1.20557	0.227985	0.999176
ENSG00000107874	519.621	-0.216782	0.143218	-1.51365	0.130115	0.978654
ENSG00000134597	221.042	-0.216778	0.158765	-1.3654	0.172127	0.999176
ENSG00000105605	766.524	-0.216769	0.153368	-1.41339	0.157541	0.999176
ENSG00000115540	655.979	-0.216722	0.127272	-1.70282	0.0886011	0.879876
ENSG00000101577	323.151	-0.216637	0.15288	-1.41704	0.156472	0.999176
ENSG00000139168	570.519	-0.216611	0.137669	-1.57342	0.115621	0.945722
ENSG00000174482	37.4269	-0.216576	0.186046	-1.1641	0.244384	0.999176
ENSG00000214535	105.956	-0.216537	0.17553	-1.23362	0.217344	0.999176
ENSG00000144713	5591.88	-0.216491	0.108909	-1.98782	0.0468314	0.681297
ENSG00000179542	80.445	-0.216442	0.18154	-1.19226	0.233161	0.999176
ENSG00000246705	157.526	-0.216376	0.16816	-1.28673	0.198189	0.999176
ENSG00000228121	26.2716	-0.216367	0.180797	-1.19674	0.231409	0.999176
ENSG00000159079	173.794	-0.216345	0.169884	-1.27348	0.202846	0.999176
ENSG00000184908	19.6005	-0.216309	0.171801	-1.25906	0.208007	0.999176
ENSG00000171984	35.6978	-0.2163	0.185567	-1.16561	0.243771	0.999176
ENSG00000100883	769.064	-0.216233	0.125034	-1.72939	0.0837391	0.860698
ENSG00000120885	1878.73	-0.216228	0.126768	-1.70569	0.0880651	0.877609
ENSG00000196236	225.399	-0.216154	0.157612	-1.37144	0.170239	0.999176
ENSG00000215571	10.4181	-0.216076	0.14428	-1.49762	0.134233	0.984545
ENSG00000249395	52.1968	-0.215568	0.187246	-1.15125	0.249628	0.999176
ENSG00000101347	471.374	-0.215442	0.147914	-1.45653	0.145245	0.999176
ENSG00000133884	909.52	-0.215345	0.123898	-1.73808	0.0821967	0.853737
ENSG00000184100	195.306	-0.215309	0.160647	-1.34026	0.180162	0.999176
ENSG00000087095	858.133	-0.215245	0.122834	-1.75233	0.0797168	0.845471
ENSG00000185272	24.1558	-0.215237	0.178807	-1.20374	0.22869	0.999176
ENSG00000183044	156.888	-0.215022	0.173836	-1.23693	0.216114	0.999176
ENSG00000186854	64.6473	-0.214996	0.185921	-1.15639	0.247523	0.999176
ENSG00000122696	51.3139	-0.214974	0.187113	-1.1489	0.250597	0.999176
ENSG00000132004	101.899	-0.214942	0.177729	-1.20938	0.226518	0.999176
ENSG00000084207	5920.18	-0.214926	0.108034	-1.98942	0.0466545	0.680468
ENSG00000177951	260.935	-0.214847	0.150494	-1.42761	0.153403	0.999176
ENSG00000126243	138.181	-0.214768	0.179483	-1.19659	0.231467	0.999176
ENSG00000109475	3604.35	-0.214671	0.110452	-1.94357	0.0519477	0.714672
ENSG00000198951	387.345	-0.214655	0.148169	-1.44871	0.147417	0.999176
ENSG00000115255	128.855	-0.21452	0.178936	-1.19887	0.230579	0.999176
ENSG00000065615	152.047	-0.214451	0.167346	-1.28148	0.200025	0.999176
ENSG00000215305	148.608	-0.214413	0.1694	-1.26573	0.205611	0.999176
ENSG00000141447	1053.86	-0.214319	0.121711	-1.76088	0.0782584	0.842528
ENSG00000065057	333.499	-0.21421	0.146949	-1.45771	0.144919	0.999176
ENSG00000230311	116.299	-0.214208	0.176192	-1.21576	0.224075	0.999176
ENSG00000169131	175.521	-0.21392	0.164098	-1.30361	0.192365	0.999176
ENSG00000211450	435.193	-0.213907	0.141166	-1.51528	0.129701	0.977268
ENSG00000261586	101.69	-0.213856	0.177664	-1.20371	0.228702	0.999176
ENSG00000171444	210.874	-0.213793	0.172964	-1.23605	0.216439	0.999176
ENSG00000107551	112.011	-0.213748	0.175788	-1.21595	0.224006	0.999176
ENSG00000032444	613.322	-0.213588	0.144688	-1.4762	0.139891	0.994439
ENSG00000147912	77.3186	-0.213566	0.182729	-1.16876	0.242501	0.999176
ENSG00000147394	431.736	-0.213446	0.155513	-1.37253	0.169899	0.999176
ENSG00000105499	167.407	-0.213319	0.164266	-1.29862	0.194075	0.999176
ENSG00000227097	2747.4	-0.213185	0.120527	-1.76877	0.0769315	0.836767
ENSG00000177954	46.8452	-0.213081	0.187306	-1.13761	0.255283	0.999176
ENSG00000106538	853.297	-0.212925	0.126792	-1.67932	0.0930891	0.890841
ENSG00000171100	106.455	-0.212894	0.176498	-1.20621	0.227736	0.999176
ENSG00000170837	182.027	-0.212883	0.168735	-1.26164	0.207078	0.999176
ENSG00000234925	21.8939	-0.212688	0.176427	-1.20553	0.228	0.999176
ENSG00000039987	35.8794	-0.212618	0.184271	-1.15383	0.248568	0.999176
ENSG00000220583	80.7449	-0.212555	0.182134	-1.16702	0.243201	0.999176
ENSG00000163590	327.954	-0.212501	0.153415	-1.38514	0.166011	0.999176
ENSG00000110711	213.815	-0.212474	0.161776	-1.31338	0.189054	0.999176
ENSG00000254682	97.7891	-0.212451	0.178253	-1.19185	0.23332	0.999176
ENSG00000131771	105.237	-0.212359	0.177516	-1.19628	0.231586	0.999176
ENSG00000167081	410.864	-0.211777	0.142915	-1.48184	0.138383	0.9905
ENSG00000117758	168.237	-0.211763	0.164533	-1.28705	0.198076	0.999176
ENSG00000033327	243.789	-0.211731	0.17147	-1.2348	0.216905	0.999176
ENSG00000153162	33.0719	-0.21171	0.185116	-1.14366	0.252764	0.999176
ENSG00000161800	703.202	-0.211646	0.128706	-1.64441	0.100091	0.913173
ENSG00000161016	15759.7	-0.211591	0.110184	-1.92035	0.0548143	0.732182
ENSG00000109472	133.47	-0.211558	0.175187	-1.20761	0.227196	0.999176
ENSG00000132749	394.951	-0.211442	0.147032	-1.43807	0.150414	0.999176
ENSG00000225259	282.789	-0.211279	0.148041	-1.42717	0.153532	0.999176
ENSG00000160539	37.7976	-0.211232	0.184756	-1.1433	0.252914	0.999176
ENSG00000106266	421.218	-0.211141	0.139779	-1.51053	0.130909	0.978943
ENSG00000233913	21.0181	-0.211122	0.173268	-1.21847	0.223046	0.999176
ENSG00000100564	36.2596	-0.210967	0.186437	-1.13157	0.257814	0.999176
ENSG00000254470	53.0613	-0.210871	0.187258	-1.1261	0.260124	0.999176
ENSG00000232176	153.213	-0.210816	0.167532	-1.25836	0.208261	0.999176
ENSG00000109881	253.415	-0.210792	0.155418	-1.3563	0.175005	0.999176
ENSG00000122359	785.03	-0.210653	0.127693	-1.64968	0.0990091	0.910472
ENSG00000115415	990.638	-0.210635	0.122206	-1.72361	0.0847777	0.862999
ENSG00000184897	771.219	-0.21052	0.145815	-1.44375	0.14881	0.999176
ENSG00000224905	17.5545	-0.210421	0.169991	-1.23783	0.215778	0.999176
ENSG00000176884	10.7311	-0.21023	0.145816	-1.44175	0.149374	0.999176
ENSG00000170448	449.781	-0.210184	0.148566	-1.41475	0.157141	0.999176
ENSG00000175600	48.7836	-0.210023	0.187379	-1.12085	0.262354	0.999176
ENSG00000240395	62.3736	-0.209993	0.186029	-1.12882	0.258972	0.999176
ENSG00000124098	231.808	-0.209881	0.156357	-1.34232	0.179492	0.999176
ENSG00000118816	3480.56	-0.209825	0.124575	-1.68432	0.09212	0.8901
ENSG00000228288	63.9138	-0.209711	0.187314	-1.11957	0.262897	0.999176
ENSG00000147403	5222.17	-0.2096	0.108529	-1.93128	0.0534481	0.724368
ENSG00000229007	17.1265	-0.209523	0.169311	-1.23751	0.215898	0.999176
ENSG00000124587	214.284	-0.209482	0.164335	-1.27473	0.202406	0.999176
ENSG00000180673	53.3038	-0.209155	0.187157	-1.11754	0.263765	0.999176
ENSG00000228204	7.756	-0.209092	0.134636	-1.55302	0.120418	0.952887
ENSG00000228929	365.263	-0.209046	0.143043	-1.46142	0.143901	0.999057
ENSG00000144120	293.583	-0.209042	0.149743	-1.396	0.162714	0.999176
ENSG00000183666	19.5342	-0.208974	0.165501	-1.26267	0.206707	0.999176
ENSG00000156925	633.993	-0.208734	0.148302	-1.40749	0.159281	0.999176
ENSG00000109171	501.569	-0.208666	0.138029	-1.51176	0.130596	0.978943
ENSG00000110011	143.604	-0.208555	0.178538	-1.16813	0.242756	0.999176
ENSG00000163536	76.8435	-0.208544	0.182528	-1.14253	0.253234	0.999176
ENSG00000153208	80.9108	-0.208396	0.181313	-1.14937	0.250402	0.999176
ENSG00000112667	207.339	-0.208244	0.168875	-1.23313	0.217528	0.999176
ENSG00000158467	408.808	-0.208058	0.149316	-1.39341	0.163495	0.999176
ENSG00000113761	205.531	-0.207961	0.165827	-1.25408	0.209812	0.999176
ENSG00000164867	37.1656	-0.20794	0.185569	-1.12055	0.262478	0.999176
ENSG00000175756	663.835	-0.20787	0.130823	-1.58894	0.112074	0.940142
ENSG00000150991	4075.03	-0.207813	0.129742	-1.60173	0.109215	0.936076
ENSG00000128694	143.611	-0.207704	0.167364	-1.24103	0.214595	0.999176
ENSG00000253677	19.5424	-0.207642	0.168636	-1.2313	0.218209	0.999176
ENSG00000101079	434.248	-0.207425	0.139852	-1.48318	0.138026	0.9905
ENSG00000135119	108.452	-0.207367	0.17777	-1.16649	0.243415	0.999176
ENSG00000178715	151.231	-0.207303	0.168371	-1.23123	0.218238	0.999176
ENSG00000109685	2111.27	-0.207246	0.112343	-1.84476	0.0650724	0.78277
ENSG00000242247	217.705	-0.20723	0.168496	-1.22988	0.218741	0.999176
ENSG00000173992	223.805	-0.207179	0.160461	-1.29115	0.196653	0.999176
ENSG00000177225	323.237	-0.207117	0.145253	-1.4259	0.153896	0.999176
ENSG00000154803	188.162	-0.207107	0.166998	-1.24017	0.214911	0.999176
ENSG00000095059	481.663	-0.207079	0.137878	-1.5019	0.133123	0.98341
ENSG00000160973	522.068	-0.207057	0.142772	-1.45026	0.146985	0.999176
ENSG00000251050	8.21944	-0.206994	0.138239	-1.49736	0.134299	0.984545
ENSG00000103489	548.815	-0.206964	0.139026	-1.48867	0.136574	0.987532
ENSG00000109610	43.6252	-0.206889	0.185896	-1.11293	0.265737	0.999176
ENSG00000188878	38.3508	-0.206737	0.186426	-1.10895	0.267451	0.999176
ENSG00000077549	3525.43	-0.20663	0.117243	-1.76241	0.0779996	0.841828
ENSG00000196132	25.6891	-0.206548	0.180731	-1.14285	0.253102	0.999176
ENSG00000184221	6.06766	-0.206487	0.12445	-1.6592	0.0970747	0.904323
ENSG00000090889	632.559	-0.206441	0.135373	-1.52499	0.127263	0.973734
ENSG00000144028	6234.83	-0.206249	0.108669	-1.89795	0.0577027	0.739967
ENSG00000130856	171.834	-0.206143	0.177748	-1.15974	0.246153	0.999176
ENSG00000165511	3.33308	-0.20611	0.095926	-2.14864	0.0316632	NA
ENSG00000073910	141.925	-0.205773	0.175505	-1.17246	0.241012	0.999176
ENSG00000133101	20.729	-0.20575	0.175415	-1.17293	0.240822	0.999176
ENSG00000165323	606.872	-0.205662	0.181074	-1.13579	0.256045	0.999176
ENSG00000168118	349.507	-0.205656	0.143796	-1.43019	0.152662	0.999176
ENSG00000108187	23.3475	-0.205649	0.176747	-1.16353	0.244616	0.999176
ENSG00000260948	12.1074	-0.205528	0.145928	-1.40842	0.159006	0.999176
ENSG00000108349	1818.97	-0.20552	0.113543	-1.81007	0.0702856	0.815053
ENSG00000095209	143.853	-0.205471	0.172774	-1.18925	0.234341	0.999176
ENSG00000198130	234.87	-0.20541	0.163078	-1.25958	0.20782	0.999176
ENSG00000074054	760.749	-0.20534	0.134071	-1.53157	0.125628	0.969992
ENSG00000141971	227.645	-0.205254	0.165765	-1.23822	0.215634	0.999176
ENSG00000159335	2969.68	-0.205242	0.12547	-1.63579	0.101883	0.91803
ENSG00000159110	69.5132	-0.20513	0.185097	-1.10823	0.267763	0.999176
ENSG00000088367	461.791	-0.205111	0.14244	-1.43998	0.149874	0.999176
ENSG00000205302	797.57	-0.205093	0.128156	-1.60034	0.109524	0.936447
ENSG00000155906	251.644	-0.204895	0.159737	-1.28271	0.199595	0.999176
ENSG00000081320	135.967	-0.204802	0.174231	-1.17546	0.239809	0.999176
ENSG00000134070	13.2274	-0.204611	0.157645	-1.29792	0.194313	0.999176
ENSG00000182985	360.949	-0.204566	0.147572	-1.38622	0.165681	0.999176
ENSG00000232838	19.982	-0.204544	0.17365	-1.17791	0.238834	0.999176
ENSG00000176142	480.08	-0.204515	0.137422	-1.48823	0.136692	0.987532
ENSG00000151687	14.4406	-0.204311	0.159673	-1.27955	0.200702	0.999176
ENSG00000212789	46.1194	-0.20413	0.187346	-1.08959	0.275895	0.999176
ENSG00000131116	72.8256	-0.204108	0.184687	-1.10516	0.269091	0.999176
ENSG00000100387	318.495	-0.204106	0.156165	-1.30699	0.191217	0.999176
ENSG00000110717	629.527	-0.203927	0.137354	-1.48468	0.13763	0.9905
ENSG00000171858	2574.46	-0.203827	0.111081	-1.83495	0.0665135	0.790039
ENSG00000011275	555.517	-0.203591	0.143338	-1.42036	0.155504	0.999176
ENSG00000187210	213.616	-0.203543	0.158042	-1.2879	0.19778	0.999176
ENSG00000260336	102.581	-0.20346	0.182335	-1.11586	0.264481	0.999176
ENSG00000099385	83.8954	-0.203417	0.182062	-1.1173	0.263867	0.999176
ENSG00000181085	22.255	-0.20338	0.170981	-1.18949	0.234248	0.999176
ENSG00000258649	99.179	-0.203348	0.181638	-1.11952	0.262917	0.999176
ENSG00000107679	469.389	-0.203302	0.145717	-1.39519	0.16296	0.999176
ENSG00000145626	30.8723	-0.203289	0.18265	-1.113	0.26571	0.999176
ENSG00000072134	334.062	-0.20326	0.157797	-1.28811	0.197709	0.999176
ENSG00000164181	96.9884	-0.203232	0.180769	-1.12427	0.260901	0.999176
ENSG00000072133	121.678	-0.203117	0.17568	-1.15617	0.247611	0.999176
ENSG00000188846	3940.72	-0.203058	0.111038	-1.82872	0.0674409	0.798704
ENSG00000084693	729.577	-0.203014	0.128718	-1.57719	0.114752	0.945722
ENSG00000164484	295.592	-0.202957	0.150613	-1.34754	0.177806	0.999176
ENSG00000234028	26.6642	-0.202852	0.17721	-1.1447	0.252334	0.999176
ENSG00000204628	17770.6	-0.202737	0.105052	-1.92988	0.0536222	0.724368
ENSG00000041988	110.699	-0.202702	0.174517	-1.1615	0.245437	0.999176
ENSG00000167105	132.75	-0.202689	0.171981	-1.17855	0.238577	0.999176
ENSG00000139372	599.868	-0.202454	0.155986	-1.2979	0.194322	0.999176
ENSG00000173801	1380.75	-0.202417	0.122858	-1.64757	0.0994411	0.912789
ENSG00000230626	65.8188	-0.202353	0.185136	-1.093	0.274393	0.999176
ENSG00000067606	252.564	-0.202191	0.151212	-1.33713	0.18118	0.999176
ENSG00000063046	7122.4	-0.201929	0.12111	-1.66733	0.0954498	0.897527
ENSG00000205358	210.775	-0.201848	0.0992872	-2.03297	0.0420552	0.643119
ENSG00000249026	30.2566	-0.201798	0.182872	-1.10349	0.269814	0.999176
ENSG00000055609	569.577	-0.201754	0.166128	-1.21445	0.224577	0.999176
ENSG00000135341	841.442	-0.201712	0.131063	-1.53905	0.123793	0.963411
ENSG00000120549	308.029	-0.201687	0.154927	-1.30182	0.192976	0.999176
ENSG00000268913	30.6748	-0.201684	0.18251	-1.10506	0.269134	0.999176
ENSG00000183828	83.8132	-0.201628	0.181012	-1.1139	0.265324	0.999176
ENSG00000185585	205.057	-0.201536	0.164074	-1.22833	0.219324	0.999176
ENSG00000197530	132.361	-0.201523	0.17324	-1.16326	0.244725	0.999176
ENSG00000072518	627.425	-0.201455	0.12985	-1.55145	0.120795	0.954526
ENSG00000234797	3801.22	-0.20144	0.113492	-1.77493	0.075909	0.834422
ENSG00000109790	266.634	-0.201357	0.162553	-1.23871	0.215452	0.999176
ENSG00000185686	3.78556	-0.201342	0.0993969	-2.02564	0.0428021	NA
ENSG00000246859	67.7414	-0.20116	0.185738	-1.08303	0.278795	0.999176
ENSG00000137210	459.477	-0.201118	0.154315	-1.30329	0.192475	0.999176
ENSG00000104324	20.459	-0.201111	0.172771	-1.16403	0.24441	0.999176
ENSG00000135637	32.5697	-0.20109	0.184164	-1.09191	0.274873	0.999176
ENSG00000085644	110.339	-0.200749	0.179218	-1.12014	0.262654	0.999176
ENSG00000230022	8.93527	-0.200597	0.141915	-1.41351	0.157507	0.999176
ENSG00000185485	30.5842	-0.200579	0.182234	-1.10066	0.271043	0.999176
ENSG00000237984	72.0547	-0.200448	0.185115	-1.08283	0.278884	0.999176
ENSG00000239415	23.4873	-0.20042	0.178611	-1.1221	0.261819	0.999176
ENSG00000166557	552.821	-0.200403	0.138271	-1.44935	0.14724	0.999176
ENSG00000187608	138.084	-0.200326	0.182685	-1.09657	0.272831	0.999176
ENSG00000130560	502.102	-0.200267	0.14304	-1.40008	0.161489	0.999176
ENSG00000140859	66.3339	-0.200202	0.187253	-1.06916	0.285	0.999176
ENSG00000073050	332.504	-0.20019	0.147809	-1.35439	0.175613	0.999176
ENSG00000165752	151.012	-0.200173	0.167609	-1.19429	0.232366	0.999176
ENSG00000165915	244.732	-0.200164	0.157913	-1.26756	0.204954	0.999176
ENSG00000143418	1237.1	-0.200135	0.119242	-1.6784	0.0932689	0.89137
ENSG00000169302	22.1356	-0.200032	0.173579	-1.1524	0.249157	0.999176
ENSG00000114107	303.945	-0.200017	0.156146	-1.28096	0.200207	0.999176
ENSG00000166441	6484.63	-0.200002	0.107054	-1.86823	0.0617298	0.764703
ENSG00000111879	155.493	-0.2	0.178367	-1.12129	0.262167	0.999176
ENSG00000175906	66.7071	-0.199923	0.185946	-1.07517	0.282299	0.999176
ENSG00000070756	23637.8	-0.199868	0.125484	-1.59277	0.111211	0.940142
ENSG00000184743	512.913	-0.199535	0.151168	-1.31995	0.186852	0.999176
ENSG00000185745	61.6856	-0.199476	0.186139	-1.07165	0.283876	0.999176
ENSG00000197548	170.975	-0.199348	0.165904	-1.20158	0.229526	0.999176
ENSG00000110987	189.439	-0.199232	0.167354	-1.19048	0.233857	0.999176
ENSG00000213018	13.8337	-0.199193	0.161487	-1.23349	0.217393	0.999176
ENSG00000169756	500.388	-0.199141	0.133623	-1.49032	0.136139	0.986624
ENSG00000165929	416.123	-0.199137	0.138389	-1.43896	0.150162	0.999176
ENSG00000175826	466.954	-0.199041	0.13938	-1.42805	0.153277	0.999176
ENSG00000157881	228.439	-0.198892	0.160924	-1.23594	0.216481	0.999176
ENSG00000087266	404.83	-0.198794	0.143071	-1.38948	0.164688	0.999176
ENSG00000163009	12.0281	-0.198676	0.152854	-1.29977	0.193679	0.999176
ENSG00000189229	5.73484	-0.198651	0.121126	-1.64004	0.100998	0.9138
ENSG00000117407	65.8511	-0.198481	0.185896	-1.0677	0.285656	0.999176
ENSG00000125966	215.723	-0.198426	0.16396	-1.21021	0.2262	0.999176
ENSG00000157240	28.6504	-0.198412	0.183171	-1.08321	0.278716	0.999176
ENSG00000064309	283.06	-0.198366	0.155664	-1.27433	0.202548	0.999176
ENSG00000119138	23.42	-0.198366	0.174291	-1.13813	0.255065	0.999176
ENSG00000131100	711.675	-0.198281	0.142574	-1.39072	0.164309	0.999176
ENSG00000136485	1882.75	-0.198248	0.124147	-1.59688	0.110293	0.938182
ENSG00000166575	411.598	-0.198228	0.13794	-1.43706	0.150702	0.999176
ENSG00000150471	175.376	-0.198191	0.162842	-1.21707	0.223576	0.999176
ENSG00000226525	470.609	-0.198182	0.135046	-1.46751	0.142236	0.997118
ENSG00000159733	31.2436	-0.198115	0.184069	-1.07631	0.28179	0.999176
ENSG00000154822	188.686	-0.198112	0.166704	-1.1884	0.234675	0.999176
ENSG00000197943	138.68	-0.198105	0.1774	-1.11671	0.264118	0.999176
ENSG00000183283	262.83	-0.198006	0.152063	-1.30213	0.192871	0.999176
ENSG00000218208	70.8218	-0.19795	0.184884	-1.07068	0.284315	0.999176
ENSG00000119655	758.772	-0.197903	0.136891	-1.4457	0.148262	0.999176
ENSG00000120913	141.348	-0.197794	0.179041	-1.10474	0.269272	0.999176
ENSG00000100116	363.508	-0.197746	0.149191	-1.32545	0.185022	0.999176
ENSG00000145016	166.08	-0.197659	0.164757	-1.1997	0.230256	0.999176
ENSG00000108963	103.628	-0.197493	0.177877	-1.11028	0.266878	0.999176
ENSG00000175061	3671.5	-0.19741	0.110666	-1.78383	0.0744519	0.830411
ENSG00000248835	98.1331	-0.197393	0.177768	-1.1104	0.266827	0.999176
ENSG00000153363	31.597	-0.197108	0.184487	-1.06841	0.285334	0.999176
ENSG00000164938	249.594	-0.197076	0.15671	-1.25758	0.208542	0.999176
ENSG00000139197	571.099	-0.197026	0.135622	-1.45276	0.146289	0.999176
ENSG00000185112	37.6424	-0.197013	0.186451	-1.05665	0.290672	0.999176
ENSG00000227533	29.2004	-0.196973	0.178983	-1.10051	0.271109	0.999176
ENSG00000101444	5496.29	-0.196944	0.110881	-1.77617	0.0757053	0.834422
ENSG00000232573	4992.54	-0.196811	0.117842	-1.67012	0.0948949	0.894692
ENSG00000133112	10086.9	-0.196773	0.106989	-1.83919	0.0658868	0.786411
ENSG00000250444	51.7528	-0.19674	0.187137	-1.05132	0.293113	0.999176
ENSG00000101843	572.242	-0.196566	0.133456	-1.47289	0.140782	0.995118
ENSG00000198909	319.517	-0.196148	0.14697	-1.33461	0.182003	0.999176
ENSG00000128891	32.0378	-0.195968	0.179462	-1.09197	0.274844	0.999176
ENSG00000138767	228.272	-0.195904	0.168306	-1.16398	0.244433	0.999176
ENSG00000100077	616.107	-0.195835	0.131131	-1.49343	0.135324	0.985606
ENSG00000150477	47.3774	-0.19577	0.187381	-1.04477	0.29613	0.999176
ENSG00000147003	26.4047	-0.195757	0.179787	-1.08882	0.276232	0.999176
ENSG00000229212	16.5313	-0.195644	0.161637	-1.21038	0.226131	0.999176
ENSG00000039650	406.172	-0.195505	0.147923	-1.32167	0.186279	0.999176
ENSG00000260719	23.8006	-0.195346	0.178234	-1.09601	0.273074	0.999176
ENSG00000125691	10961.9	-0.195336	0.105733	-1.84744	0.0646835	0.781583
ENSG00000181830	184.529	-0.195045	0.162059	-1.20354	0.228767	0.999176
ENSG00000234546	7.66248	-0.195009	0.135487	-1.43932	0.150059	0.999176
ENSG00000253250	68.4934	-0.194911	0.186233	-1.0466	0.295285	0.999176
ENSG00000226360	526.717	-0.19481	0.1324	-1.47137	0.14119	0.995265
ENSG00000130313	331.438	-0.194803	0.149262	-1.30511	0.191857	0.999176
ENSG00000124486	6671.43	-0.194625	0.186759	-1.04211	0.297358	0.999176
ENSG00000119522	441.757	-0.194571	0.13787	-1.41126	0.158168	0.999176
ENSG00000179262	1013.13	-0.194531	0.143659	-1.35411	0.1757	0.999176
ENSG00000087903	29.2591	-0.194504	0.183275	-1.06127	0.288569	0.999176
ENSG00000231167	493.547	-0.194388	0.140056	-1.38793	0.16516	0.999176
ENSG00000249565	459.509	-0.19435	0.137602	-1.4124	0.157831	0.999176
ENSG00000158079	121.868	-0.194312	0.174128	-1.11592	0.264458	0.999176
ENSG00000146729	718.102	-0.194212	0.13171	-1.47454	0.140335	0.994439
ENSG00000121671	270.356	-0.194174	0.163605	-1.18684	0.23529	0.999176
ENSG00000177888	149.007	-0.194132	0.167816	-1.15681	0.247349	0.999176
ENSG00000163686	58.1775	-0.19408	0.18653	-1.04048	0.298119	0.999176
ENSG00000213741	3167.29	-0.193841	0.112728	-1.71955	0.0855145	0.866249
ENSG00000173267	26.9994	-0.193799	0.181828	-1.06583	0.286499	0.999176
ENSG00000157036	73.9322	-0.193724	0.184824	-1.04815	0.294568	0.999176
ENSG00000179335	340.462	-0.193578	0.152725	-1.26749	0.204979	0.999176
ENSG00000212719	79.4818	-0.193527	0.183597	-1.05409	0.291844	0.999176
ENSG00000067365	267.687	-0.193507	0.150289	-1.28756	0.197898	0.999176
ENSG00000117280	134.54	-0.193459	0.173855	-1.11276	0.265811	0.999176
ENSG00000138771	930.491	-0.193409	0.127377	-1.5184	0.128914	0.976386
ENSG00000044446	355.053	-0.193365	0.141583	-1.36573	0.172022	0.999176
ENSG00000226948	46.0456	-0.193347	0.187378	-1.03185	0.30214	0.999176
ENSG00000184304	61.3012	-0.193225	0.187352	-1.03135	0.302378	0.999176
ENSG00000214870	9.39823	-0.193221	0.144097	-1.34091	0.179949	0.999176
ENSG00000197724	217.275	-0.19314	0.158726	-1.21681	0.223677	0.999176
ENSG00000162997	11.0264	-0.193091	0.148199	-1.30291	0.192604	0.999176
ENSG00000163155	76.94	-0.193084	0.182928	-1.05552	0.291187	0.999176
ENSG00000095321	139.323	-0.192984	0.179409	-1.07567	0.282076	0.999176
ENSG00000179277	28.2813	-0.192931	0.18261	-1.05652	0.290733	0.999176
ENSG00000235954	128.266	-0.192863	0.174698	-1.10398	0.269602	0.999176
ENSG00000171219	152.263	-0.192852	0.180908	-1.06602	0.286415	0.999176
ENSG00000100503	287.783	-0.192834	0.156239	-1.23422	0.21712	0.999176
ENSG00000109846	12.6933	-0.192807	0.157971	-1.22052	0.222267	0.999176
ENSG00000087460	9915.49	-0.192804	0.111055	-1.73611	0.0825437	0.854081
ENSG00000089486	1011.9	-0.192468	0.129487	-1.48639	0.137176	0.989629
ENSG00000168209	916.828	-0.192421	0.130721	-1.47199	0.141023	0.995265
ENSG00000159128	293.457	-0.192268	0.164261	-1.1705	0.241798	0.999176
ENSG00000113100	7.44944	-0.192218	0.128819	-1.49216	0.135657	0.985915
ENSG00000177565	1390.05	-0.192217	0.120469	-1.59557	0.110584	0.938609
ENSG00000101224	410.696	-0.192092	0.139453	-1.37746	0.168369	0.999176
ENSG00000154429	160.166	-0.192052	0.171372	-1.12067	0.262427	0.999176
ENSG00000229852	22.5028	-0.19204	0.177905	-1.07945	0.280386	0.999176
ENSG00000171714	139.953	-0.191972	0.170735	-1.12438	0.26085	0.999176
ENSG00000088970	248.609	-0.191971	0.152637	-1.2577	0.208502	0.999176
ENSG00000272275	9.45595	-0.191903	0.139595	-1.37471	0.169222	0.999176
ENSG00000054983	216.879	-0.191872	0.164209	-1.16847	0.242619	0.999176
ENSG00000088038	720.931	-0.191852	0.126677	-1.5145	0.129899	0.978299
ENSG00000234009	382.768	-0.191606	0.145032	-1.32113	0.18646	0.999176
ENSG00000260668	22.5386	-0.19152	0.177452	-1.07928	0.280464	0.999176
ENSG00000124067	423.03	-0.191516	0.158702	-1.20677	0.227522	0.999176
ENSG00000174165	68.5276	-0.191441	0.186714	-1.02532	0.305213	0.999176
ENSG00000036054	255.467	-0.191428	0.153494	-1.24714	0.212345	0.999176
ENSG00000172809	4428.19	-0.191307	0.109622	-1.74515	0.0809585	0.848519
ENSG00000164889	557.562	-0.191204	0.132067	-1.44778	0.147679	0.999176
ENSG00000249592	14.2614	-0.191048	0.161039	-1.18635	0.235486	0.999176
ENSG00000212802	1983.69	-0.191047	0.112598	-1.69672	0.0897494	0.880983
ENSG00000176920	35.4127	-0.190912	0.185064	-1.0316	0.302258	0.999176
ENSG00000128596	249.642	-0.190888	0.155093	-1.23079	0.2184	0.999176
ENSG00000176407	1354.75	-0.19086	0.119948	-1.59119	0.111566	0.940142
ENSG00000139636	312.812	-0.190837	0.160962	-1.1856	0.23578	0.999176
ENSG00000135108	962.807	-0.190708	0.121032	-1.57568	0.115099	0.945722
ENSG00000257951	13.9153	-0.190601	0.153998	-1.23769	0.215832	0.999176
ENSG00000196981	38.9952	-0.19044	0.186812	-1.01942	0.308003	0.999176
ENSG00000116584	684.746	-0.190381	0.145416	-1.30922	0.190461	0.999176
ENSG00000197582	67.88	-0.190348	0.184972	-1.02907	0.303449	0.999176
ENSG00000197358	289.342	-0.19034	0.16484	-1.15469	0.248216	0.999176
ENSG00000142945	1184.05	-0.190335	0.133828	-1.42224	0.154956	0.999176
ENSG00000239528	3.33436	-0.190259	0.0914438	-2.08062	0.037469	NA
ENSG00000103510	462.137	-0.190224	0.135599	-1.40284	0.160665	0.999176
ENSG00000239282	4.19098	-0.190024	0.106716	-1.78065	0.0749697	0.831309
ENSG00000167601	657.925	-0.189994	0.152873	-1.24282	0.213934	0.999176
ENSG00000151846	551.214	-0.1899	0.138883	-1.36734	0.17152	0.999176
ENSG00000184428	580.429	-0.189854	0.130761	-1.45192	0.146525	0.999176
ENSG00000177770	7.67314	-0.18974	0.135045	-1.40501	0.160018	0.999176
ENSG00000205704	7.67314	-0.18974	0.135045	-1.40501	0.160018	0.999176
ENSG00000130733	444.314	-0.189683	0.14386	-1.31852	0.18733	0.999176
ENSG00000189343	1856.1	-0.189632	0.119124	-1.59189	0.111409	0.940142
ENSG00000233859	154.843	-0.189599	0.166864	-1.13625	0.255854	0.999176
ENSG00000254934	1926.15	-0.189598	0.115258	-1.64498	0.0999733	0.913173
ENSG00000148680	806.723	-0.189557	0.131242	-1.44433	0.148645	0.999176
ENSG00000166405	73.9014	-0.189499	0.184256	-1.02846	0.303735	0.999176
ENSG00000115266	35.4518	-0.189447	0.186034	-1.01835	0.308514	0.999176
ENSG00000235007	4.17952	-0.189436	0.106059	-1.78613	0.0740775	0.830411
ENSG00000132549	289.539	-0.189326	0.153703	-1.23177	0.218037	0.999176
ENSG00000168067	255.545	-0.189318	0.162504	-1.16501	0.244016	0.999176
ENSG00000224631	2664.5	-0.189176	0.112228	-1.68564	0.0918647	0.889943
ENSG00000197157	4409.49	-0.189152	0.11602	-1.63033	0.103032	0.920578
ENSG00000234975	111.643	-0.189148	0.174333	-1.08499	0.277928	0.999176
ENSG00000182319	450.013	-0.189101	0.152606	-1.23915	0.215292	0.999176
ENSG00000243302	35.5607	-0.18905	0.182821	-1.03407	0.301103	0.999176
ENSG00000006740	243.448	-0.189002	0.161988	-1.16677	0.243304	0.999176
ENSG00000178974	236.962	-0.188998	0.157755	-1.19804	0.2309	0.999176
ENSG00000254013	60.9802	-0.188956	0.185992	-1.01593	0.309661	0.999176
ENSG00000109674	149.404	-0.188953	0.168179	-1.12352	0.261216	0.999176
ENSG00000163517	107.916	-0.188912	0.176579	-1.06985	0.284688	0.999176
ENSG00000104763	559.142	-0.188868	0.134611	-1.40306	0.160598	0.999176
ENSG00000140988	11471.4	-0.188803	0.117152	-1.6116	0.107048	0.928677
ENSG00000123685	12.9679	-0.188767	0.154257	-1.22372	0.221058	0.999176
ENSG00000172478	4.46458	-0.188581	0.099173	-1.90154	0.0572313	0.737313
ENSG00000169607	246.148	-0.188423	0.155146	-1.21449	0.224562	0.999176
ENSG00000104886	751.882	-0.188353	0.125038	-1.50637	0.131973	0.980234
ENSG00000118513	49.4001	-0.188338	0.187244	-1.00584	0.314491	0.999176
ENSG00000118181	4225.42	-0.188294	0.114116	-1.65002	0.0989384	0.910472
ENSG00000132510	171.787	-0.188216	0.186548	-1.00894	0.313003	0.999176
ENSG00000148660	412.709	-0.188173	0.142328	-1.32211	0.186133	0.999176
ENSG00000262001	154.032	-0.188169	0.171555	-1.09685	0.272709	0.999176
ENSG00000136231	2634.33	-0.188144	0.123973	-1.51762	0.129109	0.976386
ENSG00000105640	1525.3	-0.188068	0.11666	-1.61211	0.106939	0.928677
ENSG00000171863	2790.44	-0.187873	0.117779	-1.59513	0.110682	0.938609
ENSG00000160469	181.15	-0.187852	0.167115	-1.12409	0.260976	0.999176
ENSG00000169727	1156.73	-0.187707	0.128463	-1.46118	0.143966	0.999057
ENSG00000142534	12531.9	-0.187641	0.105444	-1.77953	0.0751527	0.832001
ENSG00000132517	9.13743	-0.187565	0.134833	-1.3911	0.164196	0.999176
ENSG00000153944	1107.48	-0.187552	0.127095	-1.47568	0.14003	0.994439
ENSG00000174951	153.616	-0.187467	0.166882	-1.12335	0.26129	0.999176
ENSG00000251364	5.12965	-0.187459	0.11715	-1.60017	0.109561	0.936447
ENSG00000089220	4225.17	-0.187301	0.11589	-1.6162	0.106052	0.926171
ENSG00000142632	603.875	-0.18727	0.131804	-1.42082	0.155368	0.999176
ENSG00000170604	163.728	-0.187224	0.168101	-1.11376	0.265382	0.999176
ENSG00000183780	18.4119	-0.187213	0.170642	-1.09711	0.272593	0.999176
ENSG00000234741	1726.58	-0.187163	0.123408	-1.51661	0.129364	0.976386
ENSG00000108474	116.356	-0.186708	0.175571	-1.06343	0.287586	0.999176
ENSG00000254667	15.8565	-0.186629	0.164354	-1.13553	0.256153	0.999176
ENSG00000242028	8.88927	-0.186519	0.135181	-1.37977	0.167657	0.999176
ENSG00000090661	551.111	-0.186497	0.1408	-1.32455	0.18532	0.999176
[truncated: 62,052 more rows]

## Sheet: MEL1vMEL2 at 20% O2
Gene ID	Base Mean	Log2(FC)	StdErr	Wald Stats	P value	Padj value
[truncated: 63,677 more rows]
